# Supplementary material for: Time-restricted feeding promotes skeletal muscle function in diet- and genetic-induced obesity through shared and unique pathways
Source: Research Square preprint supplement (doi:10.21203/rs.3.rs-828135/v1), 2021-09-08
Supplement: Supplementary file 1 [file 0af704e46f83dea08c527f8f.xlsx]

## Sheet: Table 1
Supplementary Table 1: FPKM values of Drosophila skeletal muscle transcripts under ALF and TRF in WT, DIO and GIO models
Gene	ALF_WT_4AM	ALF_WT_4PM	ALF_WT_8AM	ALF_WT_8PM	ALF_WT_12AM	ALF_WT_12PM	ALF_DIO_4AM	ALF_DIO_4PM	ALF_DIO_8AM	ALF_DIO_8PM	ALF_DIO_12AM	ALF_DIO_12PM	ALF_GIO_4AM	ALF_GIO_4PM	ALF_GIO_8PM	ALF_GIO_12AM	ALF_GIO_12PM	TRF_WT_4AM	TRF_WT_4PM	TRF_WT_8AM	TRF_WT_12AM	TRF_WT_12PM	TRF_DIO_4AM	TRF_DIO_4PM	TRF_DIO_8AM	TRF_DIO_8PM	TRF_DIO_12AM	TRF_DIO_12PM	TRF_GIO_4AM	TRF_GIO_4PM	TRF_GIO_8AM	TRF_GIO_8PM	TRF_GIO_12AM	TRF_GIO_12PM
CG11023	0.0615465	0	0	0	0	0	0	0	0	0	0	0	0.092778	0.0976539	0.118179	0.0806046	0.276404	0	0	0	0	0	0	0	0	0	0.0183833	0	0.216061	0.0587239	0.107577	0.117235	0.044018	0.0585185
l(2)gl	50.7404	45.8045	51.9094	56.6175	54.9991	57.4366	34.6309	48.766	68.1396	42.6593	45.2222	45.7004	37.8362	49.9509	50.6632	33.2388	37.7881	63.7938	39.9269	50.862	64.461	47.625	50.2169	91.0777	48.5331	50.738	43.0072	44.9925	40.5245	34.4611	43.4155	39.94	48.0196	34.4417
Ir21a	0.308084	0	0.0403389	0.136802	0.330417	0.0679366	0	0.149442	0.10629	0.143315	0.0791292	0	0	0.0465549	0.112679	0.134494	0.118594	0.121347	0.0391179	0.0597566	0.162224	0	0.045599	0.0781901	0.0695879	0.03424	0.0920212	0.0715016	0.139055	0.0419935	0.173089	0.0419174	0.0786932	0.06277
CR43609	0.259434	0	0.285339	0.107519	0.454459	0.0800921	0.278949	0.234908	0.501231	0.126718	0.186575	0.248975	0.117325	0.0823271	0.13284	0.0453024	0.139814	0.143059	0.230585	0.140897	0.143437	0.285485	0.161273	0.368721	0.205097	0.161465	0.185976	0.252885	0.0910752	0.0990143	0.113366	0.0741262	0.166992	0.024667
Cda5	9.68071	7.63771	12.8916	8.38622	10.4495	10.3096	7.91763	5.65441	9.82976	6.93819	5.45953	6.08487	5.40576	8.03441	6.10693	4.98898	5.52235	14.8974	9.37604	10.1599	10.837	5.68621	5.82571	8.06782	6.20811	4.6956	4.21079	8.65607	6.25495	5.75378	8.30586	5.45236	7.71719	6.80903
CR45339	0.948422	0	0.434636	0.491328	0.593351	2.19597	0.318676	1.07345	0.381744	0	0.213146	0.325067	0	0.250805	0.607038	0	0	1.30747	0.842959	0	0.873948	0	0.736966	0.168493	0.937226	0	0	0.963001	0.166474	0.226231	0.207218	0	0.169577	0.22544
CR45340	0	0.86011	0.512324	0	1.39882	0	0	0	0	0.910083	0	1.14951	0	0.59127	1.07331	0	0.502068	0	0	0	1.54524	0	0	0.794442	0.22095	0	0.333918	0	0	0	0	0	1.19933	0.531473
dbr	40.7124	29.1263	43.1135	31.9229	32.6948	45.4949	21.7077	25.9652	47.8253	27.0082	28.495	21.3321	30.5695	39.7049	32.1156	26.3283	22.3842	45.1694	28.8705	33.0682	38.3449	25.6124	28.5111	31.2432	36.4144	19.6681	23.5371	27.9418	31.3923	26.7598	37.7608	36.4724	42.5449	26.0182
CR44987	1.03384	0.763586	1.17498	0.599849	1.1901	0.702166	0.750336	0.842497	1.59792	0.639628	1.09666	0.992164	0.280522	0.656145	0.476431	0.270795	0.538584	0.912143	0.551328	0.673768	0.762128	0.910123	0.53556	1.74852	0.964425	0.450407	0.568186	0.722216	0.49359	0.434028	0.650538	0.374163	0.591521	0.393191
galectin	283.107	299.003	213.104	157.536	183.09	254.242	201.049	190.991	385.042	213.588	218.996	163.275	117.581	204.611	122.273	105.578	130.713	196.562	204.747	230.653	165.455	164.307	120.054	266.999	215.798	150.552	122.928	172.962	159.983	140.66	190.152	183.168	249.81	141.088
CG11374	0.587774	0.258407	0.692641	1.04398	1.36583	0.777672	1.01569	1.5206	2.09543	1.09368	0.754828	1.32386	0.949325	1.02142	0.859896	0.366562	0.603356	0.926044	1.26872	1.82409	1.54748	1.38599	1.21794	1.10389	1.32762	0.391946	1.30417	0.647964	0.530589	0.680993	1.21083	0.759731	1.02091	0.399183
net	14.873	15.9238	14.2514	11.3149	12.7534	18.2218	8.49212	10.7712	16.7452	9.9062	8.53159	7.73558	11.0925	13.7795	11.0505	9.01274	8.36096	11.4705	13.1729	14.3332	10.5424	11.3878	7.51606	9.70067	10.7712	5.09759	4.79964	11.2998	11.1909	8.65841	22.7469	10.9706	15.5837	9.12258
Zir	36.2345	33.0737	36.0272	35.7098	29.1523	45.2305	27.676	26.0669	54.167	36.5662	33.2637	28.3536	37.3032	50.0363	40.1398	28.6491	27.5949	46.5528	29.4263	38.0136	34.2783	24.026	27.9337	32.3452	33.4408	28.8566	22.1046	37.1761	37.2137	35.4337	53.4813	46.005	58.6471	34.1375
CG11377	16.373	14.059	12.1259	13.7833	14.6332	16.8112	13.0659	16.7114	13.2981	14.9353	14.7185	16.9856	15.4259	13.6078	13.6608	15.3483	13.1305	16.727	14.4224	11.3136	13.5382	13.2715	12.1546	12.1805	14.1284	14.1593	14.191	15.3778	16.9355	17.7492	17.8226	18.0303	18.8457	15.3242
Nhe1	14.3784	15.7035	11.9728	14.0515	18.8421	18.8337	12.4972	14.3744	18.6583	13.145	17.166	17.7848	15.9312	17.4881	14.2543	14.5933	17.3349	15.5071	12.6183	13.3021	13.7509	10.4317	13.7455	18.0018	16.7994	13.2679	16.9619	14.9402	15.4612	13.3078	13.2201	13.1973	14.387	14.9432
Sam-S	99.2243	120.012	95.145	87.412	93.8065	120.241	82.214	80.2548	101.363	96.3638	95.0283	76.1295	88.216	113.28	96.1575	102.884	86.7868	95.5542	113.446	86.5618	82.1157	92.8741	71.1902	99.0555	106.393	96.5425	74.9572	89.1429	102.502	115.054	108.851	115.945	123.631	104.018
CG11455	189.21	215.691	168	188.329	153.324	171.996	153.801	115.385	165.446	191.541	125.735	91.8953	199.088	229.958	202.666	223.322	204.514	173.424	189.554	171.772	157.725	170.404	103.72	85.7745	147.888	96.2032	113.334	103.843	229.903	271.723	324.929	277.444	297.33	231.855
CG13694	2.16179	0.792005	4.34017	1.38656	0.90164	1.43011	1.72947	0.699082	2.56896	1.67604	1.61946	1.76416	3.1036	2.8856	3.75564	2.02229	1.20202	2.55445	1.82991	1.67723	0.853732	2.15231	1.65315	0.987575	1.3428	1.12121	0.676452	1.54697	2.89107	0.933104	1.8893	1.47065	2.90816	1.95756
CG4822	49.5263	44.4264	75.0944	60.0556	50.2129	66.681	25.7165	25.8574	50.7625	31.6655	32.7018	36.1093	38.733	70.1934	51.8796	32.0485	30.4477	62.4601	50.8118	40.614	58.0311	42.9244	27.3305	27.9338	32.6675	22.078	25.8386	32.6313	42.1678	38.4992	37.921	38.4947	65.5134	40.0314
CG3164	301.619	272.55	462.879	329.872	303.72	391.139	333.036	275.443	382.346	317.2	325.213	381.641	316.349	400.149	354.366	260.408	224.743	394.217	305.126	289.797	303.811	294.654	283.591	245.76	309.623	311.142	302.624	300.896	265.511	243.036	257.561	263.775	377.518	266.999
CR44969	0.326857	0.670594	0.19972	0.564426	0.817953	0.504535	0.512523	0.246632	1.1402	0.709556	0.538686	1.12029	0.656959	0.345743	0.627615	0.523196	0.489304	1.20159	0.484186	0.295857	0.401588	0.359679	0.282203	1.12265	0.301465	0.254285	0.618314	0.398258	0.611971	0.207911	0.476095	0.259418	0.701303	0.725145
Gs1	101.268	127.439	127.297	115.031	87.4346	117.033	123.483	115.657	132.176	149.035	116.258	88.4531	110.397	129.774	128.706	110.005	120.845	131.816	154.519	137.495	135.636	112.128	82.5549	61.6685	94.8901	126.685	103.364	124.41	122.876	127.012	173.715	119.745	182.431	132.33
CR44185	0.318315	0.489801	0.87525	0.989415	0.398288	0.245675	0.213912	0.540419	1.15311	1.03652	0.214612	0.218202	0	0.0841767	0	0.138961	0.142955	0.87764	0.282919	0	1.4666	0	0.659586	0.565507	0.754937	0.371459	0.618001	0.517133	0	0	0.139096	0	0.170744	0
CR44186	0	0	0	0.238813	0.288402	0	0.309789	0	0	0	0	0.316002	0	0	0.147527	0.100622	0	0	0	0	0	0	0	0	0.273326	0	0	0.187229	0	0	0	0	0	0
CG31975	0	0	0	0	0	0	0	0	0	0	0	0	0	0	0	0	0	0	0	0	0	0	0	0	0	0	0	0	0	0	0	0	0	0
CG31976	0	0	0	0	0	0	0	0	0	0	0	0	0	0	0	0	0	0	0	0	0	0	0	0	0	0	0	0	0	0	0	0	0	0
CG31974	25.8947	22.6753	9.33783	10.7443	38.2432	49.7998	12.4297	25.1902	11.9605	12.8356	14.0922	26.7714	30.2131	32.4264	27.5973	31.3981	54.8237	26.418	16.6012	22.9722	20.732	13.9472	10.3355	14.3936	19.9199	7.45424	14.5995	19.3593	36.085	30.6959	29.1496	20.2728	20.8619	31.1939
CG11454	43.7259	41.117	41.8345	31.7925	36.9543	24.2745	44.764	33.4277	30.0535	34.0346	31.2046	28.6591	24.0915	21.5709	23.1586	25.5631	27.8481	25.7333	31.25	41.3147	27.6863	30.5302	26.2941	27.3022	28.8065	29.9394	28.4886	31.2085	25.808	28.1187	33.0185	30.9293	28.6666	28.0811
CG42399	0.872441	1.30889	1.17946	1.3559	1.22809	1.01002	1.93477	1.11089	1.80848	1.79332	1.35289	2.03337	0.624699	0.542174	0.781768	0.504646	0.548537	1.08245	1.60901	1.80643	1.88924	1.15206	1.26546	1.65069	1.05181	1.78168	1.31597	1.62997	0.543636	0.530674	0.581383	0.44662	0.530373	0.528818
CG3709	8.78532	9.01217	8.17698	5.99773	9.45869	9.35602	6.95649	5.70403	9.70379	7.59536	7.25475	8.2631	3.43917	5.07869	4.18459	4.22174	3.79255	7.88636	5.93197	7.58223	7.53066	8.84314	5.96224	9.534	7.75288	5.77508	5.61431	7.30226	4.37515	3.44394	4.76151	4.44306	5.04121	4.53269
CG3436	28.0681	26.6871	22.5771	28.1263	25.1605	28.0647	23.7607	20.5783	29.0026	24.6226	22.0684	21.9973	19.9557	28.4934	23.6494	23.3358	21.034	26.3349	21.3725	23.4342	23.9339	26.922	21.6148	27.5075	25.5675	20.728	19.3949	21.4044	23.2952	22.304	23.7979	29.4454	26.3062	21.1107
CG33635	8.42603	6.25117	8.96401	11.0686	10.1664	10.9161	6.57244	8.00415	11.1435	9.67658	9.87402	11.1394	7.25816	7.87835	8.95637	8.40776	6.62221	8.29706	6.01801	7.35449	11.092	6.78852	12.1595	15.2367	11.3003	8.66224	9.84233	6.96667	6.18009	4.59406	4.86546	5.73217	7.47905	4.64952
spen	9.05166	8.49442	10.635	10.3152	10.5276	11.173	9.46857	8.67012	14.2579	12.5619	10.9366	11.2286	10.741	11.9338	13.2974	8.71437	9.66867	11.9244	9.96042	9.63675	13.3676	7.70535	10.1457	11.6689	8.95473	10.6371	8.32693	9.35605	9.02323	8.30344	12.2677	10.3097	14.1635	9.51854
mRpL10	50.614	55.4042	50.7354	40.8907	40.0824	43.9096	42.7965	35.0971	35.5871	46.7317	37.3787	22.8375	67.992	66.4825	52.2429	76.076	64.7968	50.1674	58.5385	46.6255	43.8058	43.2881	39.3625	23.4928	39.3548	39.5756	37.7755	35.8053	67.2944	88.4552	91.2679	82.6812	77.4843	66.2769
CG11617	85.9493	74.1298	93.078	97.5329	75.9629	89.2369	83.8882	49.3156	87.5855	107.521	93.4375	49.5655	96.7229	103.091	119.356	108.209	73.8295	81.3424	71.6174	73.6298	121.472	52.5444	55.9203	50.2316	69.3296	91.3437	63.1869	43.2889	95.9364	96.6517	145.201	116.17	169.227	80.6667
Tbc1d15-17	19.8721	18.2403	19.164	16.6148	19.0269	19.2049	12.7969	17.6806	17.9725	12.998	13.7009	13.3852	15.9418	18.1323	17.3423	14.1519	14.6673	18.581	16.7716	17.0333	18.7257	17.8744	17.5272	24.7313	15.6963	14.8684	14.1834	15.2718	16.7914	16.5865	15.3285	18.877	16.1775	14.4748
kis	21.6384	21.2311	24.8238	22.912	22.0754	22.9979	18.306	19.0425	32.2562	25.7221	20.6419	19.7043	18.7766	20.6067	23.9172	17.7708	16.6872	28.4032	22.2219	23.652	26.3879	21.8247	23.3507	24.8697	21.7992	21.5668	18.9545	21.58	16.2909	17.115	22.9917	22.4998	25.559	18.2795
CR44220	0	0.445107	0	0.29971	0	0	0.194393	0	0	0	0	0.198291	0	0	0.185146	0	0	0	0	0	0.266554	0	0	0.102781	0.114342	0	0	0	0	0.138001	0	0	0	0
CR44222	0	0.149616	0.0891186	0.100743	0	0	0	0	0	0	0.0437039	0.26661	0.146574	0.0514256	0	0	0	0	0	0	0	0	0.100739	0.103645	0.0384341	0.0756445	0.0290425	0	0.0341341	0	0	0	0.0347705	0.0462247
CR44221	0.209615	0	0	0.217181	0	0.32356	0	0.237249	0.168742	0.170641	0	0	0	0.110863	0	0	0	0	0	0	0	0	0	0.0744789	0	0	0.0626096	0	0.0735861	0	0.0915965	0	0	0
snoRNA:kis-a	0	0	0	0	1.6452	0	0	0	0	0	0	0	0	0	0	0	0	0	0	0	1.21161	0	0	0	0	0	0	0.534028	0	0	0	0	0	0
CG13693	0	0	0	0.0722194	0	0	0	0	0	0	0	0.047781	0.0525369	0	0	0	0.0626073	0	0	0.0946386	0	0	0	0	0	0	0	0	0	0	0	0.0331931	0.0249258	0
mir-965	0	0	0	0	0	0	0	0	0	0	0	0	0	0	0.692136	0.944154	0.485645	0	0	0	0	0	0	0	0	0	0	0	0	0	0	0	0	0
CR44218	0.127995	0.19695	0.234626	0.397846	0.480457	0.197572	0.344058	0.289738	0.206074	0.312589	0.345184	0.175479	0.192945	0.0676952	0.163846	0.111753	0.0574823	0	0.227524	0.347567	0.117944	0.56339	0.397831	0.27287	0.708311	0.199153	0.496999	0.155955	0.0449331	0.366375	0.167792	0.121904	0.0457709	0.0608489
Rpp30	6.70161	7.89511	6.91012	5.31613	6.15796	7.11189	6.05168	7.34806	5.90061	3.92118	4.33005	5.31169	5.36685	4.59666	3.08298	7.17685	4.23237	5.19674	5.77027	6.1134	4.82451	7.37455	5.6414	7.32953	5.87747	4.39902	4.91041	5.86899	4.88905	4.99552	4.80447	5.88403	5.31721	4.3309
CG3645	12.5717	12.9269	10.8126	9.50677	9.31885	8.92107	11.9318	8.22724	6.71491	10.5252	10.3908	8.29106	7.23018	5.231	5.30079	7.59504	7.73306	9.69223	10.1146	12.2153	9.059	11.9983	9.29037	9.03964	9.11435	9.59502	9.66342	13.1159	7.71813	8.44209	8.0971	9.41985	6.81802	8.24261
CG17075	0.428716	0.28272	0.224536	0.412464	0.536426	0.496323	0.535049	0.346596	1.26955	0.498577	0.757026	1.51139	0.542402	0.526369	0.5586	0.267367	0.660123	0.295508	0.626001	0.498929	0.606687	0.151639	0.674195	0.739881	0.587065	0.285882	0.224092	0.453963	0.333256	0.467491	0.454965	0.379148	0.333994	0.720621
CR44219	0	0	0	0	0.192013	0	0	0	0	0	0	0	0	0	0	0.0669923	0	0	0	0	0	0	0	0.0545257	0	0	0.0458362	0	0	0.0732102	0	0	0	0
CG3345	0.0478724	0.0736627	0	0	0.0598997	0.0738955	0.160854	0.0541835	0.0385376	0	0.0430349	0.0656322	0.0360824	0.0759575	0	0	0.0429988	0	0	0.064998	0	0.0526795	0.0247993	0.0680387	0.0567687	0.0372433	0.0428968	0.0194433	0	0.411092	0	0.0227971	0.0342382	0
mbm	9.29086	10.5447	9.66297	9.76277	9.97614	10.0694	8.72331	8.12916	9.12358	8.42163	7.75969	9.75647	5.76111	3.97289	4.17528	11.161	5.14906	7.81204	8.72626	8.94648	6.37544	9.93377	8.90906	12.1511	8.93375	8.04822	6.79008	10.8387	6.2456	5.12396	5.61472	4.61262	3.7701	5.95183
CG11555	18.2696	21.9924	20.504	18.1565	16.6393	19.3761	15.8688	14.0667	19.5095	14.7715	14.58	14.2275	13.6765	18.9965	13.364	17.0363	15.7399	17.476	17.1218	14.3432	16.4914	16.0013	13.5203	17.0897	17.489	11.6026	11.5449	18.4242	16.9284	15.2379	20.2571	14.7369	19.8218	16.1891
CG17078	4.61796	5.34356	5.21452	4.8612	5.17723	5.53152	4.44397	4.22321	6.24538	3.90969	4.78231	4.58374	4.31601	4.76754	4.58728	5.32217	3.88237	4.99109	5.58205	5.7182	5.78725	5.16297	5.0524	5.25062	4.52693	4.3399	5.0649	4.65143	4.33171	4.95253	4.84304	4.97875	5.04661	4.53126
smo	6.38008	5.2862	7.54106	6.16171	6.10465	7.93208	4.4039	4.7052	6.66984	4.88829	4.54159	5.1057	5.85325	6.39753	5.61722	4.62525	4.3822	5.33295	5.67063	5.17396	6.30472	6.19476	5.05481	5.32368	6.16212	4.35711	4.98403	5.19425	5.98956	5.15094	5.75248	4.41299	6.349	4.80354
CG11601	10.7579	11.4036	9.56797	9.82521	13.1616	12.7927	10.4961	13.2585	11.1621	7.78459	11.7483	10.652	17.4182	15.3413	10.4559	15.098	16.4982	16.039	8.21595	12.5507	10.2803	12.5397	11.022	8.89069	10.9302	10.9731	13.3529	12.0399	15.0225	10.1505	11.3519	9.56289	11.826	13.4488
CG3625	66.06	63.2259	62.481	55.873	76.3493	78.6262	44.4326	51.615	45.7234	49.8167	44.6834	57.1368	62.6472	67.8307	65.4672	62.3342	61.0459	49.7765	62.1527	53.8788	50.3401	60.6315	35.8303	31.6153	42.7941	41.9532	39.2351	58.1836	64.4686	65.7987	69.9764	67.2706	74.4323	69.7485
Amnionless	11.3079	12.6031	5.21012	7.40964	5.27716	9.24634	4.43622	2.62891	7.03634	8.25997	2.80231	6.03358	12.8536	9.3104	15.336	11.8209	7.21952	7.92078	7.4428	1.49382	5.68874	7.26425	9.81583	6.90636	7.65901	3.75665	4.27214	5.58571	8.36853	11.0809	9.7223	14.2627	14.0327	9.29866
CG11562	25.6784	20.9462	25.2368	16.8287	15.4842	16.2369	15.8009	16.6328	12.5771	19.3928	13.28	11.6642	28.5652	25.1167	18.1186	34.035	27.2325	18.3395	20.3482	24.7832	18.673	16.1711	11.9399	10.9376	16.6315	14.8023	13.5377	12.9423	27.6408	35.1276	48.3982	29.6865	33.2453	36.6226
U2af38	14.8217	13.5549	16.6606	13.4009	11.8971	12.3027	16.585	12.4235	13.2824	13.7164	14.2039	12.221	9.37982	12.2023	10.0236	11.2012	10.487	10.2164	13.6086	11.3909	11.854	15.3099	12.4588	12.5449	12.6294	12.8363	12.2998	12.7496	12.4436	10.7066	11.8536	13.2175	11.0755	10.935
Hop	22.9356	26.7548	20.4448	35.8526	29.9861	24.6322	34.516	27.0598	22.1468	38.32	37.6368	39.6778	18.3648	16.6074	30.092	25.2936	17.0045	23.8123	23.232	20.4238	20.1859	29.4556	21.8071	29.2034	27.1978	42.5389	34.2872	35.3794	20.2596	17.1359	15.7957	26.665	18.2238	14.7103
Pi3K21B	4.66298	6.7424	5.77719	7.16197	7.41773	10.5615	5.02319	6.81594	7.50747	5.87518	6.89855	6.95505	5.84588	7.758	7.24388	7.79472	5.94566	6.84819	6.24794	4.99488	6.58558	6.11104	5.0132	9.94923	6.89106	6.23447	6.15902	6.45246	5.88153	5.09749	5.66229	5.25563	7.18104	5.85944
Plc21C	8.70709	8.35935	11.8956	9.93123	9.01369	11.0508	10.4623	8.96212	13.0001	9.26911	9.43283	13.4575	12.6206	11.0443	13.88	7.30978	11.35	12.188	9.80257	11.6602	10.6704	9.58141	10.6094	9.76776	10.1604	9.46024	7.69988	13.1783	10.8995	8.87582	12.4094	7.47053	10.9004	12.3473
CR43719	0	0	0	0	0	0	0	0	0	0	0	0	0	0	0	0	0	0	0	0	0	0	0	0	0	0	0	0	0.0500241	0.0679809	0	0	0.0509567	0
CG11912	31.826	0.793063	3.8972	2.80353	15.3161	0.596677	0.259767	0.43751	0.518627	0	0.81081	0.176651	1.16541	1.77184	0.0824706	0.168749	0.520798	6.03939	5.03898	25.0171	1.06859	0	0.400489	0.274693	0.407453	0	0.230917	0.732653	0.768967	5.71675	0.0563043	0.184077	0.230384	0.183766
CG11911	148.511	1.83549	16.2903	7.16833	72.0903	0.736517	0.0801619	0	0	0	0	0.163539	0	2.3343	0.458094	0.104149	0.964281	20.72	12.6166	52.1508	3.4075	0.131264	0	0	0	0	0.0712588	0	0.753765	11.1539	0	0	0	0.170126
CG33127	42.2665	6.64741	2.03327	1.81459	26.1506	20.7262	0.706169	21.2763	0.657939	0.760392	1.15456	18.4885	27.633	5.80471	6.87527	18.1966	7.34103	10.3014	3.83967	20.6085	13.2336	2.05572	1.02823	1.12011	2.81527	1.81669	4.28955	5.40602	27.9131	8.96799	6.07144	5.17088	1.83712	8.38155
CG43755	0	0	0	0	0	0	0	0	0	0	0	0.0276075	0	0	0.0257774	0	0	0	0	0	0	0	0	0.0286198	0.0159195	0.0313321	0	0.0163573	0.0141384	0	0	0	0	0
CG31921	0	0	0	0.0494164	0	0	0	0	0	0	0	0.0326943	0	0	0.030527	0	0	0	0	0	0	0	0.0247073	0.0169466	0	0	0.0427377	0	0	0	0	0	0	0
Ent1	49.2285	42.073	59.6403	44.9869	45.812	66.4789	26.8128	40.8424	49.3123	31.4775	29.6697	32.0162	37.0604	39.7529	27.7156	32.8637	28.8543	55.9745	42.0334	45.3296	52.8242	42.2914	39.7877	38.0269	37.3639	31.4968	36.0327	36.6519	37.3032	31.7151	39.4337	31.0429	57.5541	29.9863
CR45367	0	0	0.0862905	0.0975461	0	0	0.0632685	0.106559	0.227369	0	0.126951	0	0.0709612	0.199175	0	0.246602	0.0845631	0	0	0	0	0	0	0.100356	0.148858	0.0732441	0.140604	0.0764759	0.0991527	0.134745	0.164561	0.134501	0.0673342	0.223789
CR45366	1.09416	0.631357	1.37891	0.991949	0.513396	1.47782	0.367646	0.619203	0.550505	0.668039	0.245899	0.562528	0.412346	0.434017	0.175079	0.537364	0.245693	1.13128	0.85093	0.74279	0.756182	1.80605	0.141702	0.242981	0.324373	0.532015	0.408517	0.611039	0.336096	0.0652488	0.717181	0.521045	1.22272	0.845267
al	0	0.197168	0.117443	0	0.0801648	0.0988956	0.0430548	0	0	0.0521559	0.0287972	0	0.0482897	0.101655	0.123021	0.167815	0.028773	0.176646	0.227776	0	0.177112	0	0.0663786	0.068293	0.0759745	0	0.172229	0.130106	0.0674743	0.0916951	0.0279963	0.122039	0.0916431	0.0913744
CR43718	0	0	0	0	0	0	0	0	0	0	0	0	0	0	0	0	0	0	0	0	0	0	0	0	0	0	0	0	0	0	0	0.121904	0	0
CG4213	100.709	101.223	117.407	112.939	99.0532	77.0226	119.002	91.549	122.584	133.816	112.175	103.455	65.1136	89.146	88.3494	57.2988	65.3065	109.169	91.4117	103.27	114.121	95.0354	94.6256	134.496	113.259	122.404	92.8522	79.0939	74.866	91.2251	101.134	115.169	98.0695	78.5306
RpI135	9.60983	10.7905	10.3254	9.95671	10.1556	7.91797	7.72334	6.57747	9.14728	7.29445	6.28937	8.61265	4.96742	4.99668	4.25982	7.61085	4.30118	8.32465	6.52134	7.97843	6.07301	11.7537	8.64453	12.1584	9.95837	6.46587	6.7395	9.45427	4.76402	4.21283	4.86603	4.52986	4.53938	4.8309
AP-2alpha	37.4529	38.8098	39.8998	42.5451	38.75	45.0546	32.8616	29.8642	43.5711	40.272	32.0031	33.2927	57.568	77.6512	53.6742	50.6159	48.9029	37.7169	41.6683	41.3387	41.1649	31.4134	26.8819	35.467	31.9743	32.0566	26.7362	32.4389	56.8273	73.0568	88.6587	75.9102	93.0895	62.3462
ebi	10.5378	9.9537	8.0646	8.14362	10.3133	12.8841	9.46547	10.6674	8.03509	9.65435	9.16035	9.96522	10.5901	10.8156	8.81491	12.2523	9.91799	10.9313	9.36604	8.78287	10.2231	7.92201	9.40445	11.418	9.22431	10.8226	9.98277	8.78586	11.3666	10.8509	9.9998	11.2122	11.0562	10.5981
CG13690	0.18984	0.584225	0.0869984	0.393385	0.118768	0.73259	0.382725	0	0.229234	0.154542	0.170657	0.1952	0.0715433	0.0502022	0.182261	1.11881	0.127885	0.261708	0.253095	0	0.0874665	0.208903	0.295028	0.26981	0.0750396	0.073845	0.113406	0.501171	1.43285	0.13585	0.0829553	0.135604	0.0339433	0
RpLP1	1250.94	1150.79	1269.44	1160.6	1335.42	1138.61	1323.59	1346.45	1036	1310.62	1091.96	1125.51	891.644	765.354	803.458	1055.82	944.555	1060.5	1180.8	1154.73	1003.6	1505.2	1147.29	960.948	1103.69	1062.62	1276.58	1302.2	861.684	844.179	764.608	848.963	797.906	855.336
CG11885	21.0188	21.4548	20.9813	22.2088	17.4462	16.3829	20.8378	19.7855	16.5852	20.6684	18.3336	19.8291	17.8814	21.793	22.5106	21.1679	20.4678	17.7872	17.2018	13.5626	18.026	17.1753	19.405	22.7745	21.4699	17.8091	17.5911	16.7354	18.5564	17.1757	23.371	20.8113	17.4884	18.006
CG13692	0.521989	0	0.159475	0.360554	0.217711	0.26858	0.701567	0	0.420205	0.141644	0.234621	0.596364	0	0.184049	0.445465	0.0759582	0	0	0.618593	0.236241	0.320667	0.191468	0.0901352	0.123646	0.275107	0.135364	0	0.0706683	0.244328	0.166016	0.532224	0.248574	0	0.248154
BBS8	0	0	0.0938921	0.106139	0.0640893	0.0790639	0.413052	0	0.0824661	0.083394	0.161157	0.632004	0	0	0.0327838	0.0447209	0.0460062	0	0.045525	0	0	0	0.0265338	0.0909968	0.161971	0.0796963	0.0611961	0.187229	0.0359624	0.0977432	0.0895286	0.0731746	0.0549494	0
ex	4.9252	6.99149	8.55148	7.90603	6.87867	8.1379	8.21623	6.20261	7.48291	8.34358	7.0466	9.51037	9.00608	11.8229	8.83553	7.89632	8.86317	8.03293	10.1423	8.94755	6.67983	7.80522	7.80692	8.86085	8.34255	8.97202	8.2879	10.1286	7.4457	7.33028	8.44204	6.0452	6.94576	8.86285
CR43717	0	0	0	0.211809	0	0	0	0	0	0.16642	0	0	0	0.216242	0	0	0	0	0	0	0	0	0.105901	0	0.0808068	0	0.122122	0.166058	0.071766	0	0.0893309	0	0	0.194372
crq	64.1104	59.1392	70.9366	167.072	124.393	83.9094	67.1637	74.9534	135.924	72.9603	86.1742	116.969	73.5233	106.213	96.0057	65.6056	62.8933	95.2137	66.695	72.5926	122.046	101.083	96.2237	101.453	102.329	126.049	103.924	82.0753	99.3524	59.891	73.0014	64.9094	88.4634	63.3899
CG4164	19.1291	20.6999	21.5238	23.2839	25.1999	19.2049	35.3774	31.0681	21.3458	26.7135	32.0854	34.9142	20.9823	19.165	22.3967	18.6366	26.5059	19.2957	20.8723	22.8049	15.6206	27.4676	24.4513	15.9974	24.9277	30.5501	32.7024	34.7405	18.0986	25.4486	18.5867	27.3281	16.0447	22.2543
CG4133	0.525545	0.741283	0.280983	0.408387	0.657582	0.405614	0.470898	0.396552	0.881391	0.427828	0.984248	1.80128	0.396115	0.347444	0.280313	0.248546	0.550717	0.12075	0.233553	0.297313	0.56499	0.289159	0.680619	0.560199	0.900191	0.204429	0.261624	0.480261	0.261367	0.522336	0.344475	0.145989	0.250579	0.728713
CG4297	2.67184	2.64662	3.44371	2.8548	3.3849	4.48511	2.41272	2.41926	2.99775	2.36537	2.7246	3.57147	3.5242	3.71824	3.50573	2.87225	3.24728	3.91353	2.84969	2.9248	3.84694	2.33373	2.79414	2.12415	2.69971	2.00067	2.10486	2.69257	3.11286	2.59711	2.59775	2.3936	3.97705	2.65153
MED15	9.15125	10.166	8.55119	10.4529	9.43959	10.0603	9.95962	9.95347	9.5589	7.95848	9.28995	8.84354	8.31064	7.93287	8.37159	8.49666	7.83871	11.3233	8.92717	8.97022	9.62557	11.0526	10.9844	11.3884	9.95195	10.4881	10.2535	10.5701	8.49375	8.36952	8.60244	9.67234	8.06147	7.80969
ush	7.16054	4.77896	3.35264	6.81119	7.27558	10.0409	5.68162	10.5847	4.08362	4.50882	3.89321	5.91384	2.82208	3.91489	3.92049	2.88491	2.7586	4.85241	4.29399	4.00598	4.05436	4.86065	3.18202	4.73902	3.74432	5.1143	4.48885	5.29791	3.92506	3.81119	3.76231	3.44275	3.35038	4.2408
cbt	19.1597	41.8892	32.5053	37.004	31.7859	42.2419	30.4267	40.5443	41.9341	34.8252	29.7805	38.5943	27.9678	64.2534	58.4841	26.8526	40.7156	22.8224	40.4958	39.1903	19.8909	32.1555	21.9207	29.2464	24.8075	27.7573	21.1541	29.3878	43.6381	49.3111	61.9582	58.0908	57.0575	57.857
lwr	14.5255	15.8557	13.8253	14.6639	12.4273	13.4146	19.8981	15.3163	14.9912	16.8275	15.4293	14.0421	14.0361	14.4783	15.8129	17.0452	15.8345	12.1516	14.8413	15.3392	11.4973	19.058	16.7214	12.0426	15.5809	18.6409	17.6325	17.3708	15.2541	18.2126	16.4921	18.15	16.0935	13.9879
Spp	22.4617	28.9217	25.4743	27.2778	30.6068	26.0295	39.1025	50.3176	21.4621	25.556	35.2909	39.7953	26.5753	21.3976	26.9188	23.8304	37.4464	26.6464	25.2363	32.0354	16.3372	39.8261	34.5276	26.3346	29.4021	39.5639	43.778	54.3306	22.322	40.2238	18.4362	35.1678	14.4914	30.8941
Ets21C	1.66917	0.625636	2.47132	5.43215	1.95465	0.264258	11.8929	11.1658	3.54872	3.18798	5.85772	11.5593	0.548397	0.39613	0.465691	0.289602	0.912999	1.18003	0.779819	0.987868	4.73261	2.09581	11.9392	16.5149	5.80272	8.5239	8.37327	2.33799	0.495818	0.163345	0.589118	0.458576	0.168354	0.213641
nAChRbeta3	20.3923	17.1999	22.0824	27.3104	22.3026	14.2231	28.0169	25.9016	14.896	20.6586	17.6188	26.6114	48.4444	50.7707	49.598	44.0828	29.34	22.0733	33.9671	26.7644	19.5566	36.7351	26.1748	14.384	15.3451	26.0297	27.7928	46.0128	56.1303	43.238	32.4424	38.7358	24.9018	49.0471
rempA	0.982271	0.956224	0.826802	1.20466	0.953145	0.433208	1.30673	1.99664	1.17803	0.718038	1.32452	1.18178	0.543937	0.519513	0.500396	0.42006	0.6482	1.05014	0.552334	1.3881	0.868194	1.38974	2.03538	2.59979	1.52931	1.69991	1.4011	1.40039	0.626324	0.468611	0.376669	0.496401	0.329753	0.571803
CG2789	153.689	112.712	152.674	147.431	128.484	76.2161	192.342	221.698	105.376	152.278	189.313	142.825	142.115	102.018	138.046	151.892	180.93	109.582	116.585	102.032	103.497	166.584	171.387	117.505	172.384	173.702	225.555	135.694	151.573	132.468	125.84	171.18	93.959	121.88
CG11835	4.87452	3.23017	4.30466	10.5802	8.45872	0.933669	5.54724	2.61762	5.61393	4.05507	5.85326	4.70728	1.60906	2.1829	2.02682	1.69306	1.90151	5.59172	2.02393	1.20772	8.45891	10.6497	10.5245	5.0063	8.88854	5.56378	10.925	3.17921	2.77292	2.68194	2.0834	3.60898	2.45564	2.67256
CG2794	3.4562	4.31619	3.30549	2.95818	3.44709	3.47933	2.99583	3.74176	2.94356	2.89513	2.76924	3.43361	4.79473	4.55662	4.03956	5.77283	5.37637	3.03831	3.60611	3.26442	2.72324	3.63789	3.97004	3.89767	3.12831	3.27335	4.50334	4.23153	4.65982	3.91899	3.74285	3.9596	2.59725	5.66743
Nle	16.801	13.0385	13.5911	10.9742	10.7852	9.35874	14.334	11.2442	8.70298	9.39557	10.8021	12.1679	9.91037	6.10419	7.57417	11.6395	10.8915	7.65331	12.4007	15.6703	8.14471	15.5139	12.5253	11.9652	11.2032	11.7068	11.3456	17.5339	10.9498	9.86221	11.2358	9.56605	7.60143	9.27208
CG2807	28.9668	24.867	24.9144	22.0128	22.9859	19.9729	23.4917	16.3325	19.7393	22.5189	20.3675	17.1919	28.7159	31.9359	28.6964	27.8015	27.9429	22.7558	21.0841	22.195	19.0624	22.5004	19.5294	20.3575	22.4895	21.1062	18.0914	19.3666	26.8803	32.7443	31.7375	35.9434	31.5801	30.5794
Ipk2	11.1763	9.82703	10.2436	10.1201	11.2814	8.84329	10.9188	29.1262	9.29942	10.0157	10.7646	11.3309	6.86647	8.44432	7.2135	9.67604	11.0508	6.47366	7.76316	8.03353	11.4237	10.3349	23.3045	35.5729	9.54084	16.7321	23.2274	9.19291	10.5176	6.31759	8.29008	8.40819	6.88495	6.96522
cold	11.0911	13.0688	17.5836	20.7054	17.6284	15.7321	11.6166	12.4402	20.5113	14.8855	13.5184	17.3291	17.7736	21.033	17.9071	17.2736	14.4045	19.5601	13.0549	12.3455	18.8752	17.7025	16.719	18.3905	18.1288	14.4587	16.1462	17.491	21.8532	14.8727	15.0636	14.7981	20.4026	16.8157
Ptth	2.61165	3.49446	2.60184	2.11768	2.13117	2.97968	3.66275	3.47003	2.74226	2.77312	3.82785	2.4908	0.855852	1.02094	0.799455	1.3384	1.63184	3.44381	2.42216	4.7793	2.92974	2.37409	2.94111	5.32564	3.27652	4.32859	1.86539	3.92005	1.156	0.920911	1.48856	1.73034	1.46179	1.7814
Pph13	0.0615465	0	0	0	0	0	0.0827203	0	0	0.050103	0	0.0421896	0.231945	0	0.157571	0	0.0829213	0	0	0.167128	0	0.20318	0.0637658	0.0218683	0.024328	0	0.0183833	0.0749911	0	0.029362	0.0806829	0	0.022009	0.0292593
Gsc	0	0	0	0	0	0	0	0	0	0	0	0	0	0	0	0	0	0	0	0	0	0	0	0	0	0	0	0	0	0	0.0214061	0	0	0
CG13689	1.86505	3.32897	2.11965	2.16425	3.92048	3.22434	1.70454	2.70198	2.4022	2.30777	1.64305	1.841	1.23704	1.73607	0.90723	1.49811	1.37365	3.4967	2.05549	1.62063	2.40603	2.05232	2.39605	2.20008	2.5655	1.16076	2.20599	1.63617	1.49279	1.13889	1.66256	1.06577	2.05417	1.31223
CR43648	0	0	0	0	0	0	0	0	0	0	0	0	0	0	0	0	0	0	0	0	0	0	0	0	0	0	0	0	0	0	0	0	0	0
CR43649	0	0	0	0	0	0	0	0	0	0	0.0654184	0	0	0	0	0	0	0	0	0	0	0	0	0	0	0	0	0	0	0	0	0	0	0
lectin-21Cb	0	0	0	0	0	0	0	0	0	0	0	0	0	0	0	0	0	0	0	0	0	0	0	0	0	0	0	0	0	0	0	0	0	0
CR44797	0	0	0.189716	0	0	0	0.1391	0	0	0	0	0	0	0	0	0	0.0929589	0	0	0	0	0	0	0	0	0	0	0	0	0	0	0	0	0
CR44798	0	0	0	0	0	0	0	0	0	0	0	0	0	0	0	0	0	0	0	0	0	0	0	0	0	0	0	0	0	0	0	0	0	0
lectin-21Ca	0	0	0	0	0	0	0	0.278641	0.0990909	0	0.110655	0.0843792	0	0	0.0787857	0	0	0	0	0	0	0	0	0.0874731	0	0.0957628	0.0367665	0	0.0432123	0.0587239	0.107577	0	0.0880359	0
CG2839	0	0	0	0	0	0	0.0915148	0	0	0	0.0204032	0.0622334	0	0	0.029054	0.0198165	0	0	0	0	0	0	0	0.0322576	0	0	0.0271169	0	0	0.0433115	0.0198357	0.043233	0.0162326	0.02158
CR45369	0	0	0	0	0	0	0	0	0	0	0	0.489608	0	0	0.228576	0	0	0	0	0	0	0	0	0	0	0	0	0	0	0	0	0	0	0
ds	0.642457	0.472794	1.18622	1.21553	0.559212	1.04918	0.694539	0.526923	1.1468	0.629119	0.456171	0.791441	0.76495	1.25574	1.26341	0.57719	1.29628	1.51463	0.902042	0.986063	0.609169	0.860659	0.54504	0.559104	0.798652	0.391158	0.417163	1.53156	0.604701	0.87507	1.04565	1.41886	0.898991	1.20842
CR44988	0	0	0	0	0	0	0	0	0	0	0	0	0	0.111469	0.134897	0	0	0	0	0	0	0	0	0	0	0	0	0	0.0739882	0	0	0	0	0
Hsp60B	0	0	0	0	0	0	0	0	0	0	0	0	0	0	0.0336171	0	0.0471757	0	0	0	0	0	0	0	0	0	0	0	0	0	0	0	0	0
Eaat2	20.3067	8.45703	31.3381	51.4003	20.9204	7.54608	16.154	11.852	21.4467	12.6455	25.1847	26.3926	3.79369	5.1558	7.22071	3.85156	4.74172	14.4357	10.5412	6.95168	27.9882	31.4814	25.4595	20.772	17.1284	16.113	23.9936	13.6636	4.08226	3.76743	4.67692	7.13551	3.83771	6.42211
GABA-B-R3	0.296053	0.253081	0.256271	0.647562	0.432172	0.203105	0.176846	0.26062	0.609053	0.200839	0.46574	0.834317	0.247935	0.139182	0.263179	0.0574411	0.280687	0.272087	0.306988	0.401962	0.59108	0.271485	0.400451	0.157787	0.468093	0.20473	0.284934	0.153642	0.196313	0.196164	0.150929	0.0783233	0.0941052	0.211116
CR44614	0	0	0	0	0	0	0	0.225796	0	0	0	0	0	0	0	0	0	0	0	0	0	0	0.103345	0	0	0	0	0	0	0	0	0	0	0
CG12506	0.73699	0.37801	0	0.509062	1.53692	0	0.495268	0.5561	0.197761	0.399973	0	0.5052	0	0	0	0.107245	0.110327	0.677329	0	2.00128	0	17.3012	11.3262	0.785587	0.291316	0.191119	11.0799	2.4944	0	0	0	0.116986	0	0
CG13946	0	0	0	0	0	0	0	0	0	0	0	0.195361	0.859224	0.602921	0	0.995315	0.12799	0	0	0	0	0	0	0.101262	0	0	0	0	0.200096	0.543847	0.498141	0.407146	0	0.135486
CG13947	197.397	577.625	82.3378	57.8323	291.654	138.669	122.19	124.454	10.2209	77.6171	41.3477	73.8973	107.795	41.9379	3.5266	20.8115	55.622	119.551	36.4096	226.055	31.3463	926.081	188.134	106.228	21.6847	71.9391	616.15	374.399	31.3687	153.258	23.5534	55.1005	6.59631	16.7414
Gr21a	0	0	0.0477708	0	0	0	0	0	0	0	0	0	0.0392844	0	0	0	0.0234072	0	0	0	0	0	0	0.0185191	0	0	0	0.0211687	0	0.0248651	0.0227754	0.02482	0.0186382	0.0247781
CG3544	0	0	0	0	0	0	0	0.0300439	0	0	0.0119311	0.036392	0.0200072	0	0.0509694	0	0.0119211	0.073187	0.0235928	0	0.0489202	0	0	0.0094316	0	0	0.00792854	0.010781	0.00931855	0	0	0.0126406	0	0
Pkg21D	0.806324	3.58429	0.697975	0.928255	1.68151	1.45208	1.38476	1.77455	0.540914	0.547001	0.765115	1.22828	1.24925	1.06614	0.573431	2.56179	3.92295	0.74105	2.86665	0.973133	0.784286	1.38023	0.788988	0.73216	0.885339	0.906095	0.8697	0.709556	0.912092	1.11128	0.880859	0.383975	0.624738	1.5546
CR45259	0	0	0	0	0	0	0.166148	0	0	0	0	0	0	0	0	0	0	0	0	0	0	0	0	0	0	0	0	0	0	0	0	0	0	0
Nnf1b	0.147775	0.454771	0.270884	1.37798	0.924506	0.684312	0.595839	0.167256	0.475839	0.601491	0.464947	0.303894	0.111381	0.234469	0.283749	0.709623	0.199096	0	0.394027	0.401277	0.953195	0.650453	0.306206	0.262531	0.642532	0.574821	0.838633	0.360111	0.518768	0.422992	0.129148	0.351855	0.211376	0.281008
Dbp21E2	9.75363	10.588	8.75595	7.82154	8.94412	7.63095	9.15845	8.01496	6.66861	10.0611	9.45867	5.95331	7.09976	6.92523	7.35455	8.95338	7.20056	8.47287	8.25341	8.52622	8.1259	8.60114	9.06712	6.57513	9.63849	7.89988	10.5358	7.57012	8.30215	8.60515	9.72108	7.79424	7.31023	8.92441
Saf6	3.97505	2.94773	4.78459	2.92763	2.99623	3.84416	3.28279	3.19815	2.93007	3.23595	3.46574	3.05316	3.89852	3.21687	3.1573	3.9724	3.91451	6.33819	3.36277	3.83647	3.48639	4.3742	4.34167	4.47539	4.10797	2.75714	3.93383	3.26783	3.14398	4.31825	4.4576	4.17359	4.29867	4.00716
Pex12	2.03478	1.26932	2.01618	1.76635	2.13313	2.63154	2.10654	1.86732	1.63801	1.96983	1.95276	2.45037	2.86007	2.12326	1.40796	2.78489	1.77824	2.2744	1.90627	1.79202	2.02703	1.63394	2.30757	1.58275	2.17379	1.54022	3.20309	1.96555	2.04642	1.78405	1.68217	1.75463	2.55656	1.33335
CG15880	0	0	0	0	0	0	0	0	0	0	0.0580443	0.0885228	0	0	0	0	0	0	0	0	0	0	0	0.0458843	0	0	0	0	0	0	0	0	0	0
CG3876	3.6317	3.119	3.79307	4.72536	5.38953	4.95402	3.51893	4.9708	5.23518	4.53779	3.75822	5.03688	3.88313	4.77958	3.6759	4.90374	5.53777	3.95867	4.12865	2.52278	3.58	3.62462	4.63768	4.59138	5.3415	4.07376	5.82736	3.29304	4.2695	3.50543	3.28464	3.21755	4.53032	3.81438
Clp	1.57867	3.14361	1.10647	1.53944	1.16194	0.430029	1.24811	1.997	0.448533	1.20955	1.08523	1.01851	1.0499	0.982287	0.832119	1.98644	1.58478	2.56037	2.31103	1.38692	1.54028	1.12407	1.53939	0.890878	1.24803	1.30041	2.32992	1.81038	1.8582	1.59488	1.25795	1.85732	1.16227	1.85418
CG3662	107.559	98.1563	89.6562	249.095	191.969	106.433	130.117	140.096	173.141	89.2659	109.806	208.585	102.536	100.537	80.317	88.8961	103.266	138.435	115.877	155.625	157.43	227.753	155.759	135.042	161.857	247.864	204.385	182.509	131.707	86.651	87.5921	87.8799	82.8786	95.9955
CG3862	22.3414	22.415	22.6906	17.6737	18.9826	17.7091	21.4555	14.0102	13.7318	23.8403	19.3036	10.71	24.5193	21.3968	23.7683	27.7438	23.8635	22.267	22.943	18.7536	22.1868	24.0034	14.6624	10.4055	15.2157	13.0945	16.7505	15.0517	24.642	30.4269	32.1244	31.5938	31.8761	26.3375
dock	4.43003	4.38552	4.85535	4.94301	4.5352	5.16449	5.7459	6.76722	7.45662	5.77519	6.58625	9.04654	8.45261	9.01153	8.50633	7.77631	7.56852	3.92905	5.72716	5.13152	5.10985	4.46579	6.01806	7.17678	6.51456	8.09792	6.34766	6.10236	8.74381	9.23703	9.93627	9.20554	14.0803	8.55671
drongo	51.9023	50.116	50.8077	49.9269	47.0372	54.5144	58.8056	60.61	55.007	52.2398	51.0905	55.8246	45.0746	53.8496	36.7028	34.5237	41.778	52.5813	58.2448	71.0023	51.4426	61.7488	47.2011	65.2146	48.5803	72.3922	53.4465	63.3995	43.8706	50.9322	51.1672	51.8739	48.945	53.1419
CR44060	0	0	0.459096	0.778468	0	0	0.673221	0	0.806454	0.815529	0.450283	0.515042	0.377538	0.13246	0.3206	0.328001	0.112476	0.690524	0.445199	0.680087	0.230783	0.275598	0.25948	0.444939	0.197994	0.584526	0.299225	0.813757	0.175842	0	0.32832	0.119265	0.447802	0.595318
CG4291	5.12293	5.30051	4.37157	3.66058	4.19966	3.54484	4.57045	3.79888	3.19965	4.38611	4.64496	2.54297	3.46182	4.43791	3.7312	5.35969	5.98975	4.38351	4.39626	5.63642	3.90675	4.471	4.62132	4.01709	3.66591	3.09219	4.72239	6.529	6.23246	5.98356	6.25262	6.94014	4.86415	4.61894
kraken	30.5047	23.4693	34.2256	28.7904	28.0781	15.0191	58.4356	75.7989	20.0404	45.6696	46.4917	43.0232	37.4612	27.7702	69.7385	44.0451	44.7599	28.5186	28.1255	32.8482	23.0206	50.0624	52.4928	44.8499	27.338	57.4199	59.4336	47.1369	29.1722	37.8876	42.6324	41.9098	18.024	32.9211
CG13949	0	0.301002	0	0.202678	0	0	0.0657287	0	0	0	0.263775	0.0670469	0	0.10346	0.375614	0	0.0439256	0	0	0.132798	0	0.10763	0	0.312774	0.154646	0.0760921	0.0876429	0.198624	0.137344	0.139984	0.0854798	0	0.0349762	0
CR45345	0.294421	0	0	0	0.368391	2.27233	0	0	0	0.239678	0	0	0.443823	1.24573	0	0.25706	1.58669	0	0	0.799492	0	0	0.457556	0	0.116378	0	0	0.119579	0.516788	0.702296	0.900583	1.12164	0.315854	0.979776
mir-375	0	0	0	0	0	0	0	0	0	0	0	0	0	0	0	0	0	0	0	0	0	0	0	0	0	0	0	0	0	0	0	0	0	0
CG13950	0.862684	0.497789	0.0988361	0.223456	1.48421	1.99745	0.72467	0.976413	0.173617	0	1.64796	1.18272	3.00729	1.59693	0.552161	1.7418	4.5523	1.78391	0.766755	2.63542	0	0.474655	1.00552	0.421469	0.980375	0.251679	0.86965	1.31392	1.93066	2.21213	1.17804	1.07839	0.655552	4.30626
aru	6.85176	9.71612	11.0207	8.66506	7.2704	8.60624	10.7889	8.47733	7.21911	9.351	10.16	11.2816	12.5058	9.36155	8.85693	9.20803	9.00509	9.07523	15.2545	14.0455	7.95407	19.0712	13.3277	8.49695	11.9353	15.4427	13.9948	17.6519	10.8594	10.8158	8.79135	9.08478	7.95109	11.7679
snoRNA:Me28S-U1230	0	0	0.828524	1.87319	1.13108	0	0	0	0	0	0.81262	1.23932	0	0	0.578583	0.394627	2.02985	2.49236	0	1.22734	2.49894	1.98947	1.40484	1.28476	0.357317	0.703258	0.270004	1.46858	0.952021	0.431254	0.79002	0.860945	2.58606	0.859491
dbe	30.2695	30.9509	30.4282	22.864	24.6794	18.5388	30.5779	15.9143	16.1924	24.1644	19.662	16.7334	15.2344	13.3754	14.4992	16.8374	16.3566	16.9607	22.4775	27.5754	18.895	24.7131	21.2445	21.2674	21.1122	23.3209	16.3032	25.8965	16.0079	17.2356	17.8778	17.9018	14.8398	18.0109
PNUTS	46.8756	48.8732	51.2085	36.6632	40.4887	49.7186	33.1485	40.4128	47.0017	35.7998	33.9947	41.3679	38.0625	45.39	33.7957	36.4697	35.4213	50.9565	50.4164	49.1444	38.559	43.2318	42.2715	42.5969	46.2843	26.02	35.3309	40.4751	38.5392	49.2004	48.9778	45.4975	51.4924	44.8329
CG15824	0.0327227	0	0.0149959	0.0678078	0.0614159	0	0.0219901	0.0185183	0.013171	0	0.0220621	0.0560778	0.0246638	0	0.0314163	0.00714257	0.0146957	0.0451106	0.029084	0	0.0150766	0	0.0169513	0.0348804	0	0.0636432	0.00488695	0.00664514	0.0172311	0.031222	0.028598	0	0.0058508	0
ninaA	0	0.817647	0.365274	0.412919	0	0.615174	0.80346	0.300715	0.213882	0.108144	0.537393	0.182127	1.30166	0	0.425135	0.0579934	0.238641	0	0.236145	0.541103	0.244826	0.438552	0.137635	0.188805	0.210042	0.516745	0.277754	0.269773	0.139907	0	0.232199	0.442828	0.047505	0.189463
CR45348	0	0	0	0	0	0	0	0	0	0	0	0	0	0	0	0	0	0	0	0	0	0	0	0	0	0	0	0	0	0	0	0	0	0
Lsp1beta	13.9741	14.6372	46.7952	45.7906	12.5344	14.7484	11.9082	3.76353	4.91309	22.9231	17.7458	7.70371	2.06211	1.6696	4.36431	2.62759	1.19088	35.2793	7.5943	3.54318	3.72342	10.6993	2.92177	0.38884	1.26445	4.74808	5.45626	3.21388	1.07866	1.26505	3.32906	3.48763	1.77609	0.800399
snRNA:U1:95Ca	0	0	0	0	0	0	0	0	0	0	0	0	0	0	0	0	0	0	0	0	0	0	0	0	0	0	0	0	0	0	0	0	0	0
snRNA:U1:95Cb	0	0	0	0	0	0	0	0	0	0	0	0	0	0	0	0	0	0	0	0	0	0	0	0	0	0	0	0	0	0	0	0	0	0
snRNA:U1:21D	0	0	0	0	0	0	0	0	0	0	0	0	0	0	0	0	0	0	0	0	0	0	0	0	0	0	0	0	0	0	0	0	0	0
CR45261	0	0	0	0	0	0	0	0	0	0	0	0	0	0	0	0	0	0	0	0	0	0	0	0	0	0	0	0	0	0	0	0	0	0
CR44061	1.78012	4.38259	0.652622	0.368874	1.78188	2.19822	0	1.20887	1.71961	0	0.640094	3.41671	0	0	0	0	0	0.981606	0.949302	2.41693	2.9526	0.391773	0.553291	4.17449	0.140728	0.830926	4.46628	2.74737	0	0	0	0	0	0
GluRIIC	5.31546	9.18662	3.1773	0.798163	5.63881	7.31307	1.21657	3.92361	2.26352	1.12882	2.06022	4.3566	1.45159	1.34453	1.38059	1.27794	1.08979	3.18597	2.15679	8.94278	4.33017	1.99212	3.33221	5.74807	1.53775	2.51712	4.72849	9.51153	1.01414	0.84528	0.824735	1.10054	0.909079	1.20855
CG4341	0.3894	0.470786	0.229437	0.662821	0.348023	0.515208	0.57944	0.472217	0.806066	0.475496	1.41271	2.11638	0.796641	0.573717	0.605286	0.279274	0.911869	0.153376	0.642756	1.09517	0.640755	0.122429	0.73484	0.415077	0.87955	0.281303	0.299081	0.677805	0.400337	0.756353	0.376779	0.331133	0.397855	0.833045
CR44801	0	0	0	0	0	0	0	0	0	0	0	0	0	0	0	0	0	0	0	0	0	0	0	0	0	0	0	0	0	0	0	0	0	0
IA-2	5.53889	7.03006	2.61586	6.82581	7.18454	9.97766	10.2569	11.0826	34.3813	11.8373	26.3005	54.5093	11.9292	8.19771	11.3214	4.37802	14.9909	5.97175	9.76574	8.17895	14.3971	3.93511	12.3129	8.63372	20.2977	4.31787	5.72471	10.3088	6.02739	11.2963	5.2745	3.79799	6.27289	13.3483
CG4375	0	0	0	0	0	0	0	0	0	0	0	0.100021	0.109976	0	0	0	0.131057	0	0	0	0	0	0	0	0	0	0	0	0	0	0	0	0	0
CG4415	0	0	0	0.0859384	0	0	0	0	0	0	0.0372815	0	0	0	0	0	0.0745004	0	0	0	0	0	0	0	0	0	0.0247746	0	0.029118	0	0.0362446	0	0	0.0394318
S	3.84506	5.36932	4.31864	6.60906	4.64423	5.83229	5.92961	4.40228	6.51266	5.17468	6.80315	10.0555	4.40579	5.13693	5.54799	5.80221	5.29023	4.28958	4.583	4.01351	6.12368	4.81815	6.25189	5.7333	5.94769	5.72333	5.35071	4.94678	4.40838	4.42155	4.64239	4.36062	5.1741	4.79703
ast	6.91294	7.52384	7.14734	7.20615	7.01473	7.28736	6.71345	7.58574	7.29554	7.27469	7.38907	6.2124	5.62346	5.64033	5.80058	5.15243	4.41079	8.94889	7.5679	7.95516	6.99158	9.69442	6.65999	9.54046	8.58082	6.32906	6.58476	8.16625	5.31236	4.52463	4.56801	5.74089	4.35625	5.73119
Atg4a	11.9169	9.43041	13.705	12.4059	10.2246	8.75946	11.4595	13.5201	7.37763	12.9118	11.1208	9.43317	11.3559	10.5646	12.1312	12.0025	11.5192	10.9522	12.8614	13.0211	11.2426	12.3642	12.1702	11.2106	9.38733	13.0898	13.8818	12.1231	12.6799	13.3602	13.998	14.6736	12.0539	12.9493
CG4629	7.72621	8.05908	9.43055	11.8152	10.9222	9.80466	11.6573	8.8709	10.6751	10.9464	10.2513	14.4119	12.1508	9.74428	13.1475	10.7349	11.8608	12.6994	10.8949	10.4902	10.7135	12.1399	10.8527	9.56869	11.6581	14.9402	10.5845	9.68553	12.4662	13.202	14.5597	12.0284	11.6094	13.562
mtRNApol	14.6167	15.6231	15.4199	11.6632	11.047	12.4168	19.6453	12.5743	10.503	20.7034	18.5521	13.0793	17.9487	17.4717	15.0691	18.3934	15.9152	13.456	20.9039	15.4836	14.1695	11.9014	11.8787	10.9273	14.8707	17.992	13.31	10.8771	16.8143	26.2664	25.0556	20.6014	23.4773	21.5809
CG14339	0.106284	0	0	0.0367067	0	0.0546863	0.11904	0.0801968	0.0570394	0.0576813	0.0477719	0.0242855	0	0	0	0	0.0477318	0	0	0.0481017	0.0326459	0.0389854	0.128469	0.176232	0.0980271	0.165371	0.0846553	0.014389	0.0124371	0	0.0309622	0.0337419	0	0
CG14340	0.112337	0	0.102962	0.232785	0	0	0.0754923	0.127147	0.0904324	0.3658	0.252464	0.154013	0.508027	0.118828	0.215705	0	0.302703	0	0	0.152524	0.103516	0.123618	0.0581941	0.319319	0.0444045	0.0873952	0.100662	0.136877	0.118309	0.107185	0.0981773	0.106991	0.160687	0.10681
Pino	237.3	228.311	237.925	207.841	220.037	240.835	233.427	203.339	312.524	293.671	238.086	206.852	173.724	233.39	235.315	163.209	176.744	248.625	231.094	215.737	217.855	204.783	209.778	296.332	304.276	254.586	199.405	278.541	223.562	191.621	291.077	261.689	258.436	205.16
CG4552	46.0517	36.9796	44.1323	37.5498	30.0168	25.9213	44.7945	35.2495	27.2781	40.2441	39.1453	30.2466	39.1337	33.7815	39.2639	38.6369	33.0523	32.9534	33.6204	37.0503	34.58	34.931	34.5303	30.0466	29.6162	47.0248	40.8303	30.9875	30.1075	41.3033	40.7897	45.5329	33.2578	37.9411
Iris	89.1216	76.5775	112.173	88.9463	78.3291	135.344	35.8202	42.0974	50.658	56.772	26.8132	37.167	94.6146	185.079	153.524	94.1351	128.925	108.327	110.931	76.3718	101.312	96.7737	46.8461	35.7377	36.8326	39.3793	38.4527	72.1273	115.698	132.487	116.546	116.874	151.809	126.887
CG4577	5.5567	4.66976	2.82072	6.51015	6.52489	6.86182	14.3622	10.8852	40.7404	12.4919	30.9894	48.9025	11.9847	7.39241	12.147	5.54198	12.4199	2.35702	11.4352	6.8481	13.6674	3.48066	13.9941	9.4162	33.5379	4.95476	6.11544	10.694	8.88318	13.4789	7.09763	4.51877	7.85656	11.8265
CR45717	0.332493	0	0	0	0	0	0.22344	0.376326	0.802978	0.270671	0.448342	0.683763	0.250607	0.351704	0.212812	0	0	0	0.29552	0.451437	0.612768	0.73176	0.172241	0.118139	0.394281	0	0.198624	0.270083	0	0	0	0	0.118899	0
MFS3	0.684322	0.87749	0.470409	1.35896	0.85625	1.40842	0.459874	0.968172	3.2594	0.742778	3.5885	2.93186	2.9228	0.99531	0.4015	2.78825	1.6903	8.01879	1.01371	5.11021	1.68156	2.38462	2.03837	1.33732	4.77879	1.33096	2.74236	1.66762	1.62158	0.571321	0.548225	0.135782	0.713746	1.51819
CG4749	8.10237	8.09285	6.0582	6.25931	5.69151	5.26601	8.7405	5.63102	5.20653	8.56305	6.64471	3.84889	11.571	7.4804	8.27928	12.2557	9.25649	8.03434	7.32774	8.6849	4.51898	6.33503	6.88499	3.99002	7.30437	6.69045	8.59767	5.22481	11.0032	12.9185	12.982	11.609	10.4459	11.3529
Tfb4	2.31647	2.67331	2.54777	2.16007	2.75353	1.96663	2.95773	3.80168	1.58506	2.82864	3.2277	3.57281	2.35706	1.96025	2.14985	3.38771	3.12096	1.59671	3.19126	2.35886	2.02784	3.69616	3.47999	2.59267	2.74694	3.33396	4.28979	2.30503	1.95169	2.43125	2.42937	2.31654	2.52652	1.98225
Vps29	33.3571	27.0896	29.6179	28.921	21.5935	18.5936	36.2711	28.4471	18.9274	31.3036	29.674	18.9756	32.4751	25.9733	38.3266	37.0625	35.8911	27.4634	29.6479	28.9354	31.5916	29.5693	26.7599	16.1733	22.2045	35.5022	34.7335	29.3539	30.6985	38.1817	41.5018	38.6641	26.5905	32.4869
capt	44.379	25.773	75.0197	165.865	89.7863	18.8936	96.9979	93.0057	52.2628	93.7274	109.919	87.7559	33.8001	20.5376	162.801	45.7157	29.7351	64.1399	52.3907	49.5645	149.594	102.357	188.812	90.6812	77.2416	175.802	182.359	67.3156	28.7968	28.36	41.0214	45.6586	19.6454	22.0506
CR43767	0.296686	0	0	0	0	0	0.299066	0.167899	0	0.120761	0.0666765	0.101688	0	0	0.0949469	0.0647593	0	0	0	0	0.136694	0	0.076846	0.0527082	0.0586367	0	0.0886167	0	0.104153	0.0707698	0.259289	0	0.0530473	0.0705223
Tango14	4.82115	7.55842	4.83566	4.80667	5.46331	3.08909	7.45783	8.23657	4.17397	6.51654	8.34085	6.23557	7.74754	4.42616	7.45244	8.97466	7.96619	7.0225	6.38714	7.41038	6.20283	7.30724	7.63385	3.71692	5.5373	10.4737	10.2703	9.12549	6.16319	8.41894	6.51891	6.62765	5.13958	5.31911
CG5080	31.3918	30.2067	34.8911	47.2757	35.2401	18.154	41.003	26.4225	20.5012	24.5472	29.1338	32.1267	41.0563	28.3884	24.2806	29.2998	25.0984	33.2797	50.8114	45.8634	32.4713	60.4277	33.6002	15.6312	23.1916	48.4998	43.5275	53.6925	37.3135	37.4612	24.7493	32.7824	20.6331	31.634
IntS14	0.961725	1.66481	1.04674	0.311387	1.72981	1.48451	0.727079	1.63277	0.677421	0.929703	1.78312	1.35971	1.9481	0.953711	1.07722	1.99425	1.07977	1.16008	1.60272	1.46899	1.05237	1.58744	1.4946	0.854283	1.25924	1.54315	1.5081	1.3427	1.60368	1.63451	1.26075	1.14494	1.05323	1.62879
CG14341	19.5234	17.6389	18.8791	16.1454	18.3774	12.4416	15.407	26.1517	12.1118	12.2481	14.2498	17.3121	12.8252	10.1363	10.6617	11.807	13.7552	11.3584	14.9645	18.9687	15.5146	17.1477	20.8769	22.9746	18.1247	17.9755	17.6548	17.0955	14.3992	11.7066	17.5321	13.1354	10.2481	12.432
Plap	10.9371	10.2466	10.9121	8.90663	8.23117	7.16415	11.3367	10.2778	4.41848	7.29368	10.3217	9.37854	10.4033	7.68424	8.60185	10.9763	11.9805	9.01318	9.18287	10.6852	8.25602	11.5024	10.3907	8.37448	7.22661	12.7474	11.9823	10.3922	9.91757	10.4163	9.69958	10.3782	7.49027	10.3223
CG31922	2.09531	2.86588	4.26765	1.92972	3.78694	4.3124	2.6597	5.53358	7.3092	3.60096	4.70894	4.9473	4.56236	7.7573	4.0233	4.06537	5.64599	6.41896	2.89693	2.84487	5.14873	1.53714	4.46233	8.10666	5.88963	4.52802	3.40738	3.68769	4.65858	2.55455	4.78145	5.09984	6.07749	3.76308
CG5118	15.8688	13.2469	14.2501	17.307	18.3283	12.0988	19.9466	64.8626	24.3595	20.5019	19.5209	25.5874	18.6432	30.4113	22.6576	18.006	26.6024	13.9937	13.8187	29.2218	15.57	15.9776	36.2768	63.5518	26.03	43.734	24.3133	40.0275	25.4859	14.8959	25.7158	22.3339	16.9092	21.7769
CG4887	16.8627	15.2875	14.8979	14.3553	15.6025	13.9275	14.8747	18.4738	16.3222	15.9007	15.174	16.4239	16.7596	16.0319	14.2753	15.077	14.8881	14.7212	16.8198	19.2246	15.6009	14.6143	15.0375	19.1874	15.8422	15.9843	15.9176	17.0739	14.912	17.3952	18.4732	18.5224	16.4347	16.7882
CG4896	8.3651	8.86613	8.55164	7.30336	7.64877	8.08149	7.11528	9.73273	7.81706	7.76216	7.30947	8.01986	8.26699	6.7446	6.15907	7.63557	6.56775	9.59647	9.30664	9.96768	6.98054	7.75673	8.01522	9.34277	7.36457	7.41798	7.74904	7.75717	6.46873	8.55356	8.32037	8.07843	8.21053	7.75888
CG5126	5.55285	5.55382	5.08943	5.17796	5.55835	7.71421	3.6383	6.75626	1.89979	3.5033	4.39897	4.56771	7.42892	4.99263	6.44181	8.57526	7.76188	4.97575	7.27969	5.74872	6.84374	5.49939	5.14181	3.97066	4.47215	5.29194	6.03306	5.94831	9.30814	7.15255	7.09739	7.70151	6.57761	6.76456
Tgt	1.92107	2.61493	1.96391	2.60285	3.14332	1.14052	4.86602	7.44289	1.36804	1.92477	3.38747	2.83635	2.39469	1.21142	2.41187	2.77398	2.55506	1.42602	3.94027	3.6115	2.45107	3.08965	4.40172	3.43916	2.8914	4.88598	5.05387	4.11126	1.97132	2.29121	2.55067	2.35743	1.90239	2.24807
CG5001	42.4518	28.2014	43.5133	52.3921	38.3357	27.6088	47.04	29.1789	32.352	38.019	36.6237	34.2468	21.5948	29.9267	39.5733	21.1592	23.9739	36.9859	31.8434	31.6299	43.9509	45.8034	44.7833	37.464	41.0451	41.2721	43.5634	33.4073	21.2981	28.3113	26.728	29.1801	19.8791	23.7771
CG5139	0.144274	0.221998	0	0	0	0	0	0	0	0	0	0	0	0	0	0	0	0	0	0	0	0	0	0	0	0	0	0	0	0	0	0	0	0
CG43348	22.104	0.694124	0	0.233692	0.846653	0.348159	10.307	7.91385	1.45256	17.9941	51.5008	5.10223	1.19002	0	0.866182	0.787715	4.55825	0	0	0.306238	2.49407	0.744598	46.1525	2.16381	6.95411	73.8736	80.3044	0.458036	1.10853	0.107603	0.68992	1.07408	0.564597	0.214454
CG43349	28.7378	4.65471	1.38629	0.783556	11.3551	4.66942	6.94562	22.2549	2.43517	15.3911	9.63105	3.80166	4.75007	1.19993	0.806738	5.72252	6.11342	1.39007	1.56838	9.58345	7.20103	0.277399	48.3176	6.62814	5.18149	45.3027	70.7023	1.12623	5.48674	1.80394	1.32186	1.92071	0.63102	1.19842
CG5011	30.2943	7.44542	0.57846	1.08986	18.4262	17.5358	6.50332	33.5738	3.0484	12.3308	12.5764	9.37376	9.35539	2.89292	2.69304	12.4903	25.5096	5.22036	1.49587	12.568	7.17273	0.926009	21.9053	7.99822	7.73365	35.8431	62.5231	1.96522	14.8446	2.30838	2.75789	5.10932	2.10646	2.40032
CG14342	0.144274	0	0	0	0.180521	0.2227	0	0.816468	0	0.234897	0.194542	0.395593	0	0.0763048	0	0	0	0	0	0.195885	0	0.158761	0.448428	0.358836	0.171085	0.224481	0.474022	0	0.202591	0	0	0	0	0.0685878
CR45346	0	0	0	0	0	0	0	0.203041	0	0	0	0	0	0	0	0	0	0	0	0	0	0	0	0	0	0	0	0	0	0	0	0	0	0
CR43263	0	0	0	0	0	0	0	0	0	0	0	0	0	0	0	0	0.0624568	0	0	0	0	0	0	0	0	0	0	0	0	0	0	0	0	0
CG42329	0.980968	2.08447	1.75539	3.19433	0.642937	0.432633	1.06732	0.52871	0.601666	0.608436	1.15479	1.2168	12.2173	11.9082	2.33208	3.60947	6.23065	5.15175	1.5777	3.86884	0.731759	0.668244	1.28252	0.331953	1.80952	0.617799	1.78593	0.626087	3.32893	2.78565	2.26577	0.867549	1.15261	2.55384
CG5397	16.5809	20.7297	22.6861	26.1821	22.542	22.3334	22.6602	20.4359	21.3692	13.2384	20.065	25.7102	18.5057	15.4309	12.679	14.7552	10.4358	23.1876	35.9926	14.882	24.0936	40.7023	44.7846	21.3847	31.951	26.233	34.6201	34.4486	28.6422	13.3105	14.1251	22.8336	14.4242	13.5671
robo3	0.202913	0.120088	0.100143	0.22641	0.429665	0.216842	0.272721	0.282663	0.841865	0.381196	0.813826	1.78684	0.529409	0.255914	0.319692	0.115838	0.595837	0.215177	0.443938	0.466235	0.546556	0.154585	0.444718	0.349397	0.57379	0.133574	0.219121	0.374028	0.142467	0.469126	0.259184	0.148659	0.245593	0.638154
a5	0	0	0	0	0	0	0	0	0	0	0	0	0	0.236584	0	0.260372	0.736604	0	0	0.202449	0	0	0.154484	0.10596	0	0	0	0.18168	0	0	0	0	0	0
CG5440	0	0	0	0	0	0	0	0	0	0	0	0	0	0	0	0	0	0	0	0	0	0	0	0	0	0	0	0	0	0	0	0	0	0
CG33923	0	0	0	0.223248	0	0	0	0	0.34691	0	0	0	0	0	0	0	0	0	0	0	0	0	0	0	0	0	0	0	0	0	0	0.102608	0	0
CG33922	0	0	0	0	0	0	0	0	0	0	0	0.147703	0	0	0	0	0	0	0	0	0	0	0.11162	0.0765593	0.0851706	0	0	0	0	0	0	0	0	0
Cdlc2	0	0	0	0.162886	0	0	0	0	0	0	0	0.107767	0.118494	0	0	0	0	0	0	0	0	0	0	0.0558592	0	0	0	0	0.0551896	0.150001	0.137395	0.14973	0.112437	0
CR45005	0	0	0	0	0	0	0	0	0	0	0	0	0	0	0	0	0	0	0	0	0	0	0	0.120919	0	0	0	0	0	0	0	0	0	0
CR45006	0	0	0	0	0	0	0.211872	0	0	0	0	0	0	0	0	0	0	0	0	0	0	0	0	0	0	0	0	0	0	0	0	0	0.112744	0
CG5556	0	0	0	0.110492	0	0	0.143331	0	0	0	0	0	0	0	0	0	0	0	0	0	0	0	0	0	0	0	0	0	0	0	0	0	0	0
CG5561	0	0	0	0	0	0	0.641442	0	0	0	0.0476697	1.01781	0	0	0	0	0	0	0	0	0	0	0	0	0	0.247526	0	0	0	0	0	0	0	0
CG31924	0	0	0	0	0.176774	0	0.854473	0	0.113731	0.230021	0.190504	1.0653	0	0	0	0	0	0	0	0	0	0	0	0.100396	0	0	0	0	0	0	0	0	0	0
CG5565	0	0	0	0	0	0.189602	0.660357	0	0.0988805	0	0.331259	1.5998	0	0.0649644	0.0786184	0	0.110327	0	0	0	0.113186	0	0	0.130931	0.145658	0.0955595	0	0	0.0431205	0.0585992	0	0	0	0
CG31659	0.832428	1.53706	0.457774	0	2.08313	3.08383	2.01385	0.753735	0.402067	0.948712	1.1973	3.30961	1.25484	0.968577	0.213118	1.16287	1.57014	0.918049	0.295945	0.904173	0.920475	0.916016	1.89738	1.71548	0.526465	1.55425	1.19346	1.41998	1.98714	0.794251	0.800251	0.158563	0.416746	0.395737
NLaz	284.586	281.242	177.675	127.501	447.311	464.467	140.558	292.811	151.757	230.114	168.38	314.85	369.415	184.388	89.6566	306.898	379.215	199.076	129.692	327.463	221.316	301.86	440.446	259.448	167.422	221.713	404.62	335.096	343.764	215.565	153.488	132.836	114.552	154.873
CG14346	0	0	0	0	0	0	0	0	0	0	0.0545726	0.0832282	0	0	0	0	0	0	0	0	0	0	0	0	0	0	0	0	0	0	0	0.0578179	0	0
CR44898	0	0	0	0	0	0	0	0	0	0	0	0	0	0	0	0	0	0	0	0	0	0	0	0	0	0	0	0	0	0	0	0	0	0
lea	0.932223	0.71722	1.0424	1.58403	1.09645	0.949722	1.3657	1.30835	0.720429	1.10798	0.988866	1.23972	0.969639	0.887477	1.59907	0.529052	1.11363	0.822487	0.927989	1.18977	0.635675	1.00532	2.19245	0.596215	0.913848	1.17489	1.21402	0.893546	0.765789	1.0051	0.888041	1.30515	0.846739	1.0459
CR44897	0	0	0	0	0	0.112614	0	0	0	0	0.0327917	0	0	0	0	0	0	0	0	0	0	0	0.0377931	0.025922	0.0288377	0	0	0	0	0	0	0	0	0
CG43401	0	0	0	0	0	0	0	0	0	0	0	0	0	0	0	0	0	0	0	0	0	0	0	0	0	0	0	0	0	0	0	0	0	0
snRNA:U3:22A	0	0	0	0	0.68615	0	0	0	0	0	0	0	0	0	0	0	0	0	0	0	0	0	0	0	0	0	0	0	0	0	0	0	0	0
CG43402	27.5357	17.7157	43.8802	35.5875	32.0528	43.3925	22.3084	44.0882	57.6945	42.02	23.1145	30.648	23.2853	61.5009	41.0822	18.0102	22.3195	37.0341	9.63602	17.7161	30.5896	16.7868	34.9898	21.6811	26.8504	17.7646	25.3043	17.0676	19.6025	23.4808	25.1129	26.0425	39.7643	24.8582
CG31928	0.0739345	6.14333	0	40.3699	0.185019	0	0	0	0.0595178	0	0	0	0	0	0	0	0.0664077	0	0.131426	0	0	0	0.0383002	0.0262699	0	0	0.0662502	0	0.05191	0	0	0	0.0528778	0.0351485
CG33128	0	0	0	0.172868	0	0	0	0	0	0	0	0	0	0	0	0	0	0	0	0	0	0	0	0	0	0	0.0498349	0	0	0	0	0	0.0298319	0
CG31926	0	0	0.0657885	14.7996	0	0	0	0	0	0	0	0	0	0	0	0	0	0	0	0	0	0	0	0	0	0	0	0	0	0	0	0	0	0
CG31661	0	20.8447	0	1.25159	0.323887	0.133188	0	0	0	0	0	0	0	0.0456349	0	0	0.0387502	0.237899	0	0	0.159018	0.474744	0	0.030658	0.0682127	0	0.103089	0.0700887	0.060581	0	0	0	0	0
CG18131	0	0.0973975	0.0580148	0	0	0	0	0.0716419	0	0	0.0853517	0.0867795	0	0.0334773	0	0.055265	0.0568534	0	0	0.085941	0.0583269	0	0.0327899	0	0.0750601	0	0.0378124	0.0257081	0.088883	0.0603944	0.082978	0.0301425	0.0679052	0
CG7420	7.93423	7.23475	7.33941	6.54605	8.18109	4.87621	7.50417	7.56666	4.31722	6.93743	6.90133	7.45323	7.9736	6.64419	6.48894	7.31225	9.17207	6.88683	7.83551	6.98223	6.22806	8.08421	7.38307	4.90738	6.76612	8.17297	8.00926	8.65295	8.71708	7.57035	8.60344	8.01143	6.8042	8.59163
CR44064	0.0992346	0	0.0909529	0.102817	0	0	0	0	0	0	0	0	0	0	0	0	0	0	0	0	0	0	0	0.0705186	0	0	0	0.040304	0	0	0	0	0	0
CG18132	0	0	0	0	0	0	0	0	0	0	0	0	0	0	0	0	0	0	0	0	0	0.186149	0	0	0	0	0	0	0	0	0	0	0	0
halo	0	0	0	0	0	0	0	0	0	0	0.084428	0	0	0	0	0	0	0	0	0	0	0	0.19461	0.133482	0.0742478	0.146132	0	0.0762897	0	0	0	0	0	0
CG44072	0	0	0	0	0.817953	0	0.219653	0	0.526245	0.266084	0.146914	0.224058	0	0	0	0	0	0	0.290511	0	0.301191	0	0.338643	0.232273	0	0.508571	0.0976286	0.132753	0	0	0	0	0.116884	0.155388
Or22a	0	0.125294	0	0.168732	0	0	0	0.0921615	0	0	0.0365993	0	0	0	0	0.035547	0	0	0	0	0	0	0	0.231456	0	0	0	0	0	0	0	0.0387758	0	0
Or22b	0	0	0	0.0923607	0	0	0	0	0	0	0	0	0	0	0	0	0.0400339	0	0	0	0	0	0	0.0633472	0	0	0	0	0	0	0	0	0	0
haf	0.114392	0.146682	0.192216	0.158028	0.381684	0.35315	0.358741	0.215788	0.644605	0.139684	0.505594	0.352866	0.344879	0.32267	0.256258	0.307951	0.522295	0.998751	0.169453	0.905998	0.333797	0.0839191	0.424685	0.155806	0.44463	0.192819	0.290425	0.526548	0.234253	0.218292	0.274925	0.254212	0.299981	0.471311
CG10869	0.363697	0.319789	0.285724	0.107664	0.195031	0.401	0.244409	0.411644	0.334604	0.211481	0.140119	0.213695	0.234965	0.164876	0.133019	0.0907269	0.0933346	0.429756	0.230896	0.775977	0.430891	0.285869	0.10766	0.4246	0.205373	0.282945	0.13967	0.422043	0.0729583	0.198295	0.136223	0.12371	0.167217	0.0988009
CG31935	13.7729	12.5177	13.8373	10.4281	11.5519	12.2652	10.7304	10.4923	11.3005	11.2429	9.93214	9.67464	12.8621	14.4086	11.4309	10.9019	11.6401	10.954	11.636	13.7681	11.4711	10.8673	9.85931	12.7585	9.93104	10.5677	9.40299	9.11305	13.0971	12.8705	14.302	16.3788	15.3709	13.2932
CG14352	5.72921	5.18571	4.11849	4.5393	4.21683	3.98828	3.32166	3.94156	4.88335	6.95021	2.92859	2.84923	7.0277	9.56566	9.85051	8.48409	6.60902	3.0973	2.79568	4.27068	6.10745	3.95577	3.54984	5.18894	3.952	4.36976	3.32184	4.92757	8.47884	7.66376	8.98322	11.662	11.2883	7.20971
RFeSP	543.763	673.154	515.173	457.554	350.16	358.808	830.15	648.716	345.505	695.078	530.218	230.145	866.496	601.072	662.751	896.027	917.133	471.685	964.388	813.885	454.906	818.623	422.957	187.065	333.575	599.603	588.858	506.725	794.479	1245.27	1167.3	1110.14	751.15	938.521
CR44603	0	0.0243361	0	0.0163866	0.0197892	0.024413	0.0318851	0.0179007	0.0254635	0	0.0426525	0.0108415	0.0119206	0	0	0	0.00710279	0	0.014057	0.0214735	0	0.0174038	0.00819299	0.0168585	0.0187548	0	0	0.0192706	0.00555215	0.00754517	0	0.0075315	0.00565567	0.0150376
CR45695	0	0	0	0	0	0	0.33516	0	0.401489	0	0.224171	0.341881	0	0	0	0	0	0	0.44328	0	0	0	0	0	0	0	0.148968	0.607687	0	0	0	0	0	0
chinmo	0.247591	0.225763	0.168095	0.342037	0.332743	0.38218	0.215684	0.311368	0.900598	0.335926	0.610012	1.06233	0.352494	0.300696	0.340418	0.116092	0.518899	0.151699	0.374916	0.435767	0.566148	0.100908	0.418031	0.361664	0.37697	0.14268	0.219119	0.346369	0.212466	0.209988	0.204361	0.0873363	0.209868	0.370552
cpb	52.5069	36.6994	66.0204	104.447	81.3341	37.5572	63.1019	53.6493	47.2498	64.9965	72.2329	50.2832	33.3268	37.8427	145.733	51.9285	46.9997	62.6118	43.9984	48.8593	114.704	48.2597	82.9697	68.5633	52.1958	89.9703	91.2104	57.0717	30.9603	31.9853	48.5924	41.5113	30.893	29.3316
CG17660	18.36	15.8629	15.208	18.565	16.1547	17.8075	18.8042	23.9476	15.2937	16.5049	21.4253	18.1045	29.3788	23.3673	22.9057	24.5168	27.4702	19.2198	16.6239	18.5961	16.0136	17.6647	17.8014	20.216	17.8522	18.0645	24.7364	18.0042	25.1783	25.1529	23.9828	25.2943	25.5775	23.8513
CR44976	0	0	0.146682	0.33163	0.200246	0	0.215096	1.26795	0	0.130282	0.0719331	0.329114	0.844369	0.33857	0.409729	0.419189	0.431237	0	0.142242	0.217289	0.294942	0.352216	0.497426	2.502	0.506076	0	0.573619	0.129998	0.449456	0.0763492	0.209798	0.228633	0.457835	0.304329
mRpL48	16.4041	15.7759	17.8542	13.5059	9.34641	7.00857	16.7325	9.11757	6.60271	16.931	11.4549	6.12444	30.0272	22.0772	17.9053	32.9289	33.678	10.4995	19.9173	15.1134	8.90763	12.7326	9.40829	5.4643	11.2315	10.7109	12.5555	12.6707	27.8681	41.3654	35.2009	36.9661	26.345	32.9348
frtz	2.92402	3.26321	3.0923	2.29714	2.61332	2.28155	3.34694	3.01855	2.25039	2.72039	2.85963	2.37883	4.57732	2.49816	3.41397	3.3946	4.06939	2.21482	3.65555	3.88279	1.95419	3.64193	3.36236	2.42039	2.41321	3.59968	3.73342	3.54971	3.58706	4.07757	3.38386	4.2844	3.67692	4.01748
Rim2	175.356	175.244	166.294	170.328	138.788	150.377	140.136	146.946	123.128	184.49	125.167	76.363	295.371	362.874	328.867	317.577	316.858	200.098	224.872	208.319	210.817	150.979	100.71	127.93	118.457	177.613	109.144	147.905	293.882	384.165	435.806	433.987	447.904	305.306
Eno	576.795	643.741	553.845	407.858	341.228	325.938	601.143	499.647	324.13	574.713	394.016	257.618	468.333	350.357	319.002	460.955	486.265	431.684	688.852	742.064	354.249	558.516	268.408	213.435	377.629	484.901	391.023	397.393	455.621	689.1	610.149	679.493	465.24	625.424
Rrp40	6.06033	5.69875	2.67442	3.83722	3.37019	2.07882	6.3352	6.09714	2.80069	4.20262	3.98507	3.61578	4.90616	1.78069	2.44228	5.1933	4.73775	3.40373	4.2892	5.02842	2.17173	5.5574	4.0115	2.67171	3.72636	6.02442	4.32426	7.20187	3.86102	4.17618	3.87424	4.43583	2.28757	3.62803
CG31937	88.7351	80.7508	88.137	75.5351	68.965	47.6683	97.065	69.6839	41.8525	68.4972	79.1096	60.2242	82.6445	65.228	78.6247	77.0055	133.026	65.475	86.3378	85.8478	48.1779	88.2896	57.8136	34.758	53.4624	79.7532	76.7687	69.3406	94.3101	95.9947	89.2509	84.6518	61.4712	93.6148
CG17652	15.6466	15.1589	13.6326	15.3107	15.8313	15.0577	11.4883	9.83851	17.2607	11.7152	11.0701	12.116	7.71652	8.83722	9.3346	8.68574	10.1065	11.717	14.2501	13.6381	11.481	16.0486	11.5077	19.0119	14.1638	10.0687	9.00074	18.1623	10.2397	9.81444	11.3531	10.8085	10.9832	8.63221
CG17646	78.9625	56.8413	130.683	58.0858	45.8952	87.0902	72.35	49.8479	76.5198	48.5288	52.7983	51.1806	81.9815	49.2569	47.1415	27.9296	42.5573	79.3963	57.6454	80.4961	35.2404	71.7285	62.1505	48.4158	43.3674	26.5844	45.5066	66.4961	78.2201	44.12	69.7638	38.0677	43.6834	49.8505
CG17712	5.96264	8.55498	6.35125	5.59348	6.65413	4.60195	6.22706	6.38391	4.28106	5.96909	5.61364	5.41296	8.44176	6.86116	6.13717	10.1306	7.8525	5.77617	6.01577	4.70425	4.82619	6.20671	6.26113	5.32514	4.7138	6.51934	6.97949	6.70882	6.42106	6.26579	7.49969	7.36719	7.89503	6.93338
CG17648	0	0	0	0	0	0.330139	0	0	0	0	0	0	0	0	0	0	0.0960518	0	0	0	0	0	0	0	0	0	0	0	0	0	0	0	0	0
Gr22f	0	0	0	0	0	0	0	0	0	0	0	0	0	0	0	0	0	0	0	0	0	0	0	0	0	0	0	0.041332	0	0	0	0	0	0
CG17650	0.216681	0	0.397195	0.673506	0.271119	0	0.145612	0.490492	0.17443	0.529177	0.292178	0.445598	1.14322	0.802201	1.66424	0.378369	0.778487	1.19484	0.385172	0.294195	0.199666	0.476877	0.224494	0.230968	0.0856491	0.168571	0.12944	0.440023	0.912799	0.516858	1.04152	1.03184	1.16227	0.927091
Gr22e	0	0	0	0	0	0	0	0	0	0	0	0	0	0	0	0	0	0	0	0	0	0	0	0.0351388	0	0	0	0	0	0	0	0	0	0
Gr22d	0	0	0	0	0	0	0	0	0	0	0	0	0	0	0	0	0	0	0	0	0	0	0	0.0353503	0	0	0	0	0	0	0	0	0	0
Gr22c	0	0	0.0920582	0	0.125675	0.155039	0.0674974	0	0	0.16353	0	0	0	0	0	0	0	0	0	0.136372	0	0	0	0	0.0794039	0	0	0.0815876	0	0	0	0	0	0
Gr22b	0.0996619	0	0	0	0	0	0	0	0	0	0	0	0	0	0	0	0	0	0	0	0	0	0	0	0	0	0	0.0404776	0	0	0	0	0	0
Gr22a	0	0	0	0	0.122175	0	0	0	0	0	0.0877766	0	0	0	0	0	0	0	0	0	0.0899761	0	0	0	0	0	0	0	0	0	0.0426678	0	0	0
CG31933	0	0	0	0	0	0.0860334	0	0	0.0448677	0.0453726	0.0250519	0	0	0	0	0	0.0250308	0	0	0	0	0.0613325	0	0	0	0	0	0	0	0	0.0243551	0	0.0199311	0
CG31664	8.92202	7.97975	18.7059	10.6307	14.4429	22.1212	11.0546	12.8121	11.2672	15.071	7.89514	10.2825	14.5842	17.5479	21.0576	10.6623	12.9973	10.1472	18.5362	11.5081	13.7709	12.7019	8.8971	10.5406	10.5139	9.89103	7.67827	15.1741	13.331	13.5407	17.5198	14.5784	17.2686	17.1252
c-cup	0	0	0	0	0	0	0.0881599	0	0	0	0	0	0.395516	0.416302	0.671733	0.0572701	0.471329	0	0	0	0	0	0	0.0466127	0	0	0	0	0.276323	0	0.229303	0.0624722	0.18765	0.1871
mir-2280	0	0	0	0	0	0	0	0	0	0	0	0	0	0	0	0	0	0	0	0	0	0	0	0	0	0	0	0	0	0	0	0	0	0
wry	1.47034	1.94823	0.598947	1.67152	1.63533	1.63916	1.64681	1.68729	6.78946	2.56015	5.50734	9.39311	2.24724	1.92251	2.73178	0.508153	3.41169	1.06979	2.54108	2.16269	3.5942	0.966295	2.67645	1.90107	3.68089	0.905572	0.872248	1.84129	1.26891	2.26024	1.26716	1.06	1.31448	3.99012
CR44073	0	0	0	0	0	0	0	0	0	0	0	0	0	0	0	0	0	0	0	0	0	0	0	0	0	0	0	0	0	0	0	0	0	0
CR44074	0	0	0	0	0	0	0	0	0	0	0	0	0	0	0	0	0	0	0	0	0	0	0	0	0	0	0	0	0	0	0	0	0	0
CG31663	6.22601	20.0859	5.1275	3.98887	9.18267	5.43198	3.15313	4.83403	6.80371	4.18692	6.92174	7.87598	6.34758	6.34712	4.69724	12.1718	18.2624	3.23417	16.0397	5.513	7.3169	3.17736	4.56522	3.36636	4.19678	2.78451	2.78497	3.7747	9.883	5.79698	5.02064	3.3659	9.12077	7.66415
CG7295	0	0	0	0	0	0	0	0	0	0	0	0	0	0	0	0	0	0	0	0	0	0	0	0	0	0	0	0	0	0	0	0	0	0
CR44075	0	0	0	0	0	0	0	0	0	0.11501	0	0	0	0	0	0	0	0	0	0	0	0	0	0	0	0	0	0	0	0	0	0	0	0
CG15358	0	2.04021	0.405084	0.824261	1.21662	1.09155	0.891028	0	0	0.503709	0.0794617	0.908898	4.53046	2.71153	1.98018	2.89413	4.40642	0.243714	0.785646	0.360046	2.60649	0.583619	0.183162	0.12563	0.174701	0.0687678	0.0264022	1.07703	3.56856	4.217	1.73816	1.55746	1.01151	4.20225
CG7337	24.0344	27.2887	31.7341	25.169	23.1964	25.8311	25.4709	24.7755	27.59	26.7925	22.0368	22.4054	38.5231	39.9342	43.6155	31.0851	30.4505	32.1524	31.2959	35.5302	30.7266	25.7784	21.1675	27.0956	23.9484	27.3211	22.0538	32.6139	34.1223	34.5409	50.4306	41.0774	42.2102	32.126
CG15357	0	0	0	0	0	0	0	0	0	0	0	0	0	0	0	0	0	0	0	0	0	0	0	0	0	0	0	0	0	0	0.090288	0	0	0
CG33673	0	0	0	0	0	0	0	0	0	0	0	0	0	0	0	0	0	0	0	0	0	0	0	0.0515193	0	0	0	0	0	0	0	0	0	0
erm	0.0351588	0	0.0322246	0	0	0	0	0	0	0	0.047409	0	0	0	0	0	0.0315795	0	0	0.0477363	0	0	0	0	0	0	0.0105015	0.0142797	0	0	0.030727	0	0	0.0167145
Der-1	36.6764	29.5067	44.5363	46.2948	37.0389	23.8524	56.9259	50.467	35.7445	42.0575	50.7943	53.1541	28.2051	27.1765	36.8803	28.5274	33.1098	32.5952	30.3642	34.8831	35.6835	49.4759	48.0773	35.9196	40.3277	50.9831	57.3599	44.2345	26.0449	32.6407	28.3111	35.0196	23.002	29.9155
CG15356	3.50302	4.68533	2.939	3.15485	2.96703	3.95145	3.65788	3.41585	3.01519	3.07105	3.42761	2.82613	4.87441	4.40375	3.94956	4.96417	4.16293	3.26897	5.36479	3.6586	3.45142	3.29139	3.50371	3.73401	3.47232	3.60571	3.67819	3.65537	3.77438	5.99055	4.88657	4.70933	4.35546	4.29145
CG15362	5.12358	5.69386	5.08732	5.16106	6.76698	3.2953	7.9383	8.05421	5.38479	7.87843	5.82128	5.85361	4.61265	4.3658	5.1923	4.47341	5.43289	4.70881	7.84273	4.44441	7.73761	7.98725	5.08715	6.01768	5.90694	7.41838	9.73476	6.1272	5.44592	5.97496	5.28624	6.37078	4.83494	6.49534
CG7289	14.3412	11.4516	12.1984	12.8327	12.5066	11.0685	11.9008	12.0509	10.9763	12.6034	14.0152	12.1395	19.7351	17.0948	18.2191	14.4659	19.7854	13.4798	11.0083	12.4648	10.7122	12.4935	12.2975	11.0212	12.2179	12.7207	13.5646	12.6863	15.2562	16.3269	18.0169	16.7371	14.9773	19.188
Got2	80.408	106.271	83.5443	107.509	88.5866	113.611	79.0126	145.84	62.1507	72.7366	73.0327	69.0703	155.311	106.088	168.063	168.607	149.689	112.78	119.863	124.394	99.6734	115.651	133.361	76.7004	101.549	134.299	160.665	141.552	223.946	122.53	166.438	136.734	184.955	145.925
Npc2a	26.483	35.2804	27.5309	109.203	64.9387	17.2844	66.41	57.3333	36.9148	39.0665	46.2557	85.4083	46.218	25.005	34.5834	45.3136	47.6537	38.7139	40.9152	55.2626	53.3927	112.853	65.8326	37.7653	50.3735	114.353	99.9123	72.3325	69.4463	36.8851	46.2119	39.1036	26.6948	38.277
CR42874	0.336849	0.38874	0.154368	2.96657	1.26443	0	0.282959	0.095314	0.610123	0.616988	0.30281	1.32771	0.317363	0.356311	0.539	0.514681	0.226917	0.232185	0.0748479	0.114338	0.775995	0.648678	0.69799	0.987415	1.13177	1.31029	1.33312	0.410432	0.946016	0.361575	0.220792	0.120307	0.331256	0.320276
Obp22a	0	0	0	0	0	0	0	0	0	0	0	0	0	0	0	0	0	0	0	0	0	0	0.0824483	0	0	0	0	0	0	0	0.0695478	0	0	0
CG33543	0.583329	0.705247	0.572836	0.906578	0.782018	1.73653	1.12002	0.70739	3.22001	1.66204	2.92157	3.65593	1.22479	0.903513	1.4401	0.436548	1.75896	0.689281	1.33319	1.35773	1.88133	0.733605	1.662	1.00671	2.09166	0.421398	0.560037	1.04921	0.643594	1.59022	0.873944	0.515885	0.685393	1.42619
CR43464	0	0.145519	0.0866785	0.440931	0.118331	0.0729895	0.0317765	0.321115	0.304521	0.0384935	0.0425073	0.129655	0.10692	0.0750263	0.151325	0.0619275	0.0637074	0.130373	0.0420274	0.256804	0.0435724	0.104067	0.195962	0.268818	0.2056	0.0735734	0.240102	0.0576148	0.149398	0.0451169	0.0206626	0.0225176	0.186002	0.0674386
CG15353	0.661186	0.508693	1.81802	2.74021	3.3092	4.08241	0.888652	5.98681	2.12904	2.96037	2.37749	2.03957	2.24258	0.524541	0.423192	1.29889	1.33622	0	0.881494	1.79543	4.26487	4.00168	2.22634	1.17464	1.30676	2.82911	7.8008	1.3427	2.08901	0.788578	0.722304	0.15743	0.472879	1.41448
CR45712	0	0	0	0	0	0.651844	0.283785	0	0.226631	0	0.126539	0.289476	0.106096	0.0744482	0.180191	0	0	0	0.250221	0	0.12971	0.154898	0.291678	0.350105	0.111281	0.219019	0.126133	0.114342	0	0.0671539	0.12302	0	0.0503368	0
Nplp4	0.657429	0.674404	0.401709	0.68116	0.8226	1.69134	0.589069	1.4882	0.882059	0.891985	0.590996	0.150221	0.660692	0.115902	0	0.287001	0.393667	0	0.584324	0.297538	0.80774	1.20574	0.90818	0.778643	0.519734	0.51146	1.70184	0.267014	0.538517	0.104546	0	0.208714	0.548557	0.833446
CG4238	1.90863	3.24199	1.72662	2.36275	2.01597	1.95134	2.66519	1.93581	2.9532	2.66357	3.60979	4.63869	3.19476	3.6183	3.60139	2.92166	3.67355	2.59701	2.77591	2.82699	3.60887	2.12756	2.87629	2.31631	2.67483	2.91186	2.30255	2.90947	2.5409	2.70799	2.55623	2.30175	2.42872	3.57053
CG42296	0.144364	0	0.0661579	0.0747874	0.0451583	0.111419	0.121268	0	0.145267	0.0293804	0.0648879	0.09896	0.054405	0.0190881	0	0.0787776	0.0972502	0.0995078	0	0.196008	0	0	2.65485	0.0641178	0.185457	0.084233	0.204819	0.0293166	0.0506794	0.137743	0.0788542	0.10312	0.0645304	0.0857882
lectin-22C	0.135015	0.207751	0	0	0	0	0	0	0	0	0.0606857	0.0925513	0.203527	0.0714078	0.0864161	0.0589408	0.181904	0	0.240002	0.366628	0.124413	0.297144	0.0699415	0.239862	0.0533683	0	0.0403273	0.054836	0	0.128823	0.235992	0.321473	0.0482811	0.192558
Su(dx)	23.2717	21.374	25.9049	39.1035	27.7003	25.8714	28.1663	35.3197	29.256	31.0772	29.6784	34.4674	30.2458	33.8506	42.6632	31.1517	30.1409	27.7931	25.0994	22.3306	37.0442	26.9885	35.7166	36.4682	29.7317	50.1679	39.7828	29.1095	30.5366	36.5971	37.9895	38.1615	38.3499	31.9749
CR45298	0.267532	0.411659	0.245205	0.277189	0.836865	0.825921	0.449463	0.454202	0.215365	0.435577	0.120249	0.183391	0.504111	0.990463	0.941785	0.759143	0.841036	0	0.832239	1.08971	0.246524	0.588792	0.207884	0.665402	0.475872	0.104066	0.239726	0.325973	0.422631	0.57434	0.876785	1.1466	1.2437	1.01748
Kebab	0.774827	1.82812	0.473442	0.535197	1.09876	1.43522	1.49266	1.40316	0.997987	0.841014	1.0448	0.81441	0.272535	0.273198	0.264495	0.225501	0.162388	0	1.46916	0.631206	1.18997	0.511579	0.749249	1.96385	0.632962	0.964468	1.06459	1.32172	0.181337	0.0246431	0.180576	0.172189	0.20319	0.294683
Or22c	0	0	0	0	0	0	0	0	0	0	0	0.065605	0.360675	0.151852	0.183768	0.0835603	0.343848	0	0	0.129942	0	0	0	0	0	0	0	0	0.302379	0.045658	0.627311	0.0911505	0	0.0909965
dpr3	0.952024	0.957825	1.00681	1.17608	1.05376	0.79129	0.910446	0.704539	1.03167	1.01348	1.30019	1.83231	0.827955	0.735907	0.984323	0.799244	0.72355	0.504782	1.17161	0.646298	0.877267	1.41026	0.739764	0.702553	0.969732	1.02551	0.601528	0.8923	1.07976	1.15292	0.944024	0.749785	0.733261	1.14889
CG12674	0	0	0	0	0.118768	0	0	0	0	0	0	0.130134	0	0	0	0	0	0	0	0	0	0.104451	0	0	0	0.073845	0	0	0	0.0452834	0	0	0	0
CR44808	0	0	0	0	0	0	0	0	0	0	0	0	0	0	0	0	0	0	0	0	0	0	0	0	0	0	0	0	0	0	0	0	0	0
CR44055	0	0	0	0	0	0	0	0	0	0	0	0	0	0	0	0	0	0	0	0	0	0	0	0	0	0	0	0	0	0	0	0	0	0
CG4259	16.1755	20.503	24.8229	39.5547	30.2428	30.3256	18.2419	17.1155	31.7303	20.9375	11.7275	24.1306	20.6934	50.937	28.124	18.7493	20.9025	19.8214	23.741	19.0169	32.3234	28.6433	14.7362	25.5218	19.6469	18.6591	15.1052	23.5853	28.7404	26.2254	24.6984	21.3378	25.7303	26.2515
GlyP	236.494	232.35	206.3	286.174	180.327	172.3	184.104	211.521	163.923	287.284	182.705	134.843	221.301	206.869	201.989	229.747	254.68	260.88	368.481	275.175	210.937	360.393	210.724	129.13	225.483	208.751	258.105	151.551	225.32	405.418	300.473	327.869	278.136	299.794
tho2	11.8405	12.2561	12.2065	13.0666	12.5917	12.7245	10.7053	11.487	13.0652	12.393	12.0395	11.008	12.3296	15.4124	15.6093	12.787	12.1833	11.7479	11.3803	12.0064	12.9232	10.1786	12.2453	11.9518	11.1041	13.326	11.7994	11.766	11.2824	14.842	15.5875	16.0897	15.2828	12.225
CG11723	11.1642	9.14955	9.50956	12.0701	10.7805	10.0214	7.91026	8.65293	10.1107	8.14994	8.99975	9.31667	8.55192	10.0764	9.82529	8.92639	8.66521	9.36824	8.79029	11.4509	12.0767	10.5493	9.46088	10.1326	9.92919	8.1662	9.55081	9.90654	8.7757	9.32069	8.64341	10.2573	9.72042	8.10544
CG7261	4.8828	4.28031	5.01776	7.91051	5.29494	4.88767	5.28987	7.97157	5.62208	6.57669	7.87431	8.2765	5.42004	5.36838	8.7696	5.33543	5.88749	7.09845	4.26093	4.50005	6.89905	5.92669	9.62717	9.32651	6.36336	9.76144	9.7671	5.19223	4.86188	4.08004	4.90095	4.12901	4.43399	5.97907
AIF	10.2447	7.55477	8.2559	8.61179	8.99721	7.39962	8.78112	7.4385	6.90888	9.0952	9.93932	9.32823	10.1402	7.27896	8.36345	10.3623	6.9621	7.67444	7.79984	6.92857	8.94154	8.29556	10.9746	8.72247	9.68828	7.8498	10.6349	7.44249	9.54078	9.42447	8.68309	8.45009	9.56659	8.89528
CG15382	0.445886	0.34305	0.510843	0.346486	0.278955	0.344134	0.599284	0.504668	0.807619	0.272236	0.601245	1.06978	0.168037	0.176868	0.356737	0.145989	0.350432	0.307343	0.495381	0.302698	0.61631	0.24533	0.346473	0.396073	0.484685	0.0867216	0.266362	0.407466	0.31306	0.265898	0.146131	0.265417	0.119586	0.635924
aop	8.21027	8.42226	9.04176	11.0564	10.4854	10.5447	11.8047	10.013	12.6551	10.086	12.3392	15.7644	8.55483	11.4	12.2616	9.56713	8.12712	10.1778	8.97549	8.2093	10.2634	9.92183	11.0121	14.1112	11.9918	13.996	11.1653	10.1675	8.92975	7.90458	8.76062	9.84009	10.6515	8.38122
CR43751	0.339816	0.104577	0.21802	0.140833	0.255115	0.157362	0.342542	0.076923	0.355621	0.16598	0.213835	0.163059	0.128064	0.161753	0.0434999	0.118678	0.122089	0.281077	0.241624	0.0922761	0.344446	0.261757	0.176035	0.422594	0.174619	0.15862	0.111649	0.179421	0.131223	0.129693	0.222737	0.258916	0.109366	0.129239
CR44066	0	0	0.106477	0.120366	0	0.179323	0	0.262975	0	0	0.0522165	0.079635	0	0	0	0	0.0521727	0	0	0.315462	0	0	0.120361	0	0.0459203	0	0	0	0.0407827	0.0554222	0	0	0	0
CR45290	0.193491	0	0.354686	0	0.484206	0.298671	0.520114	0.437998	0.623046	0.157514	0.260908	0.132636	1.45838	0.716346	0.866906	1.09809	0.868964	0	0	0	0.356594	0.851681	0.300702	0.274999	0.229448	0.15053	0.346761	0.157172	0.950959	0.738468	0.591855	0.552848	0.484345	0.367943
CG10874	20.2816	20.4311	22.8017	19.502	16.5225	15.8785	20.1011	19.2396	16.3269	18.5893	17.9043	14.403	15.8916	15.8586	17.8376	17.0391	16.808	16.8965	24.1216	22.2872	17.0084	20.3915	18.3297	15.8902	18.2543	20.8299	19.3068	22.4898	16.1351	20.4652	20.3393	20.1502	19.984	17.9658
CR44065	1.49714	1.48095	2.64638	1.32958	1.07044	1.32056	0.646778	0.847255	0.860863	1.04466	0.817126	0.366527	1.04782	1.01806	2.12183	1.58726	0.864466	2.35876	2.09104	1.45194	1.28104	2.0005	0.553973	0.531953	0.676327	0.66556	0.894357	1.43329	1.05115	1.07136	0.88786	1.42589	1.52964	1.22013
CG34172	556.451	660.061	518.559	793.803	506.645	632.032	405.524	288.587	696.566	763.737	353.961	192.866	679.656	1144.5	966.767	816.498	728.874	639.397	685.316	458.806	556.4	521.862	255.332	266.206	428.799	262.796	275.238	189.323	750.32	1030.9	1218.08	1050.94	1344.9	707.455
CG31668	0	0	0.10805	0.183216	0.0737533	0	0.118834	0	0.0474505	0.143953	0.0529879	0.0808115	0.0888551	0.031175	0.0377272	0.0257322	0.0794152	0	0.209559	0.0800306	0	0.0648631	0.0610697	0.0418873	0	0.0917137	0.0880299	0.0239401	0.103463	0.0562409	0.0257572	0	0.105392	0.0280221
CG33124	0	0.17005	0.0506452	0	0	0	0.0742665	0.0625413	0.0444821	0.0449826	0.049673	0.151512	0.0832963	0	0	0.0482447	0	0	0	0.225072	0	0	0.0286246	0.0392668	0	0.0429881	0.132036	0.0448849	0.0387961	0.0527225	0.0241458	0.0263135	0.0395195	0
CG15385	5.75244	7.02711	6.27855	7.91645	8.46139	10.4384	10.4463	11.8785	8.87268	8.04309	9.15809	12.6726	8.07573	9.01109	9.55595	6.4602	8.51934	7.62747	7.22034	7.39295	6.75743	11.5004	9.8497	8.12886	9.65069	10.5561	11.3715	12.627	8.09308	11.3753	7.56021	9.78635	8.82497	9.83244
Uch	76.7191	59.5461	68.4544	107.254	73.3572	52.2675	77.367	74.2407	68.5351	74.583	82.0991	63.7317	19.6152	18.0622	19.1339	27.6212	27.0248	58.9497	59.7613	61.868	69.0901	87.2973	72.2185	68.5779	70.7847	81.8884	79.5817	59.4896	26.5589	25.0156	22.4059	25.6613	23.3869	20.3748
CG34174	8.67806	11.375	8.10112	10.9894	9.24968	10.1706	7.01973	9.82211	12.1607	11.3817	7.29552	8.37229	7.26761	11.1344	8.33159	10.0323	8.44416	9.7479	6.28473	11.1279	7.84854	6.72	7.15949	14.6748	9.46494	9.62682	6.09609	6.91863	8.34957	7.20673	8.84822	13.0098	12.9877	6.49393
CG10880	1.80089	4.43375	1.48554	1.9592	2.02801	3.19683	1.81534	1.93639	1.30476	1.61265	1.37608	1.54312	1.49311	1.71445	1.49846	2.86957	1.81975	2.2344	1.84073	1.46708	2.15733	1.98173	0.932916	1.88765	2.02878	1.4711	1.90957	1.68229	2.11791	1.50351	1.45585	1.58655	1.80319	1.11299
CG15386	0	0	0	0	0	0	0	0	0	0	0	0	0	0	0	0	0	0	0	0	0	0	0	0	0	0	0	0	0	0	0	0	0	0
CG42371	0	0	0	0	0	0	0	0	0	0	0	0	0	0	0	0	0	0	0	0	0	0	0	0	0	0	0	0	0	0	0	0	0	0
mio	8.4158	7.89026	9.25615	6.16454	6.46504	7.25056	6.12902	7.84174	6.71176	8.18936	5.99953	6.35927	8.93945	7.49429	6.58911	7.98011	8.20947	8.20219	9.56742	9.35373	8.40421	8.31325	7.74595	8.17797	6.63769	9.34886	10.1367	7.59924	8.45095	8.55271	7.85103	8.5745	9.68633	7.6668
papi	17.4507	13.0291	17.3732	21.1534	18.2854	11.1462	15.511	14.108	21.0719	14.276	17.1169	19.3577	15.6475	16.8449	17.9094	17.9007	15.0178	20.6203	13.9057	13.7725	17.5854	26.818	20.6405	22.2972	22.3416	19.0935	22.1845	17.0556	12.4484	17.5321	19.1389	17.091	15.3242	13.5679
CG15387	3.17236	3.59682	2.75457	3.28687	4.59612	5.67001	2.91729	4.72444	5.37636	2.99027	4.20264	2.86134	2.01354	4.85686	3.63347	2.40534	3.59924	5.98454	2.6712	3.17374	4.4618	2.57225	3.02727	4.98332	3.4319	3.50716	3.64057	2.23783	3.51684	2.70825	2.48064	2.46481	3.82124	3.33378
rti	59.1742	57.8553	54.2358	63.258	66.9282	82.4279	57.3026	58.5147	72.6786	58.7025	70.2355	60.5996	51.8207	65.5998	64.1459	52.564	60.2059	70.5921	47.7405	54.5141	55.27	54.6247	50.9199	73.9386	63.7305	59.7908	54.3743	58.0113	52.5304	53.9619	59.0892	57.7436	68.732	58.9228
CR44114	1.31155	0.896941	0.534262	1.2079	1.09404	1.79955	1.07724	1.15457	1.52505	1.06769	1.89952	1.09884	0.988541	0.770736	1.026	0.763409	1.37436	2.00896	1.03618	0.593577	1.74569	1.92433	0.452946	2.53716	0.806439	1.24709	0.827015	1.00618	0.409265	0.764742	1.14623	0.832753	1.61547	1.52413
Sec24CD	23.6593	21.2456	22.7394	25.6309	26.3941	22.0158	30.6067	30.1426	19.6634	26.4218	30.6314	32.6008	24.3187	22.9598	26.558	20.7721	29.2923	24.7842	21.7102	25.386	18.8857	26.8263	26.6358	21.7869	25.9809	33.12	36.1786	33.4812	20.7095	27.3544	22.95	27.1907	18.5069	30.3128
CR44115	0	0	0	0	0	0	0.115025	0	0	0	0.153869	0	0	0.0905273	0	0.0747222	0	0	0	0	0	0	0	0.182451	0	0	0.051125	0.208555	0	0	0	0	0	0.0813719
Tengl3	0	0	0	0	0	0	0.348999	0	0	0	0	0.213599	0	0	0	0	0	0	0	0	0	0	0	0.0369052	0	0	0.0310238	0	0	0	0	0	0	0
Tengl2	0	0	0	0	0	0	0.458293	0	0	0	0	0.077914	0	0	0	0	0	0	0	0	0	0	0	0.0403854	0.0898558	0	0.0339494	0.0461635	0	0	0	0	0	0
Tengl1	0.208858	0	0	0	0	0.161196	0.421067	0.590981	0.420331	0.340049	0.187753	0.286341	0	0.220926	0	0.0455887	0.046899	0	0	0	0.0962289	0.114915	0.973753	1.63262	0.825571	0.324971	0.436685	0.254483	0.0733205	0	0	0.0497297	0.112031	0
CG4267	6.99972	12.0762	10.6926	8.571	14.6635	16.4526	23.8759	65.6608	20.7464	21.5842	22.5001	27.1537	31.6151	24.8488	19.6177	16.7834	36.4844	10.5269	11.6886	16.9916	13.6331	12.4875	61.4507	87.896	28.947	46.6999	46.5981	38.3364	18.7088	15.5836	21.8512	13.7625	12.8947	20.5206
CR42859	0	0	0	0.113958	0	0	0.221741	0.062244	0	0.0895376	0.0494369	0.263886	0.0414502	0.0290858	0	0.0240077	0	0	0	0	0.0506757	0.0605163	0	0.0977005	0.0217379	0.0427838	0.0328522	0.0446715	0.0193059	0	0.024031	0.0261884	0	0.0261442
Ser12	0	0	0	0	0	0	0	0	0	0	0	0	0	0	0	0	0	0	0	0	0	0	0	0	0	0	0	0	0	0	0	0	0	0
CG17239	0	0	0	0	0	0	0	0	0	0	0	0	0	0	0	0	0	0	0	0	0.640755	0	0	0	0	0	0	0	0	0.132693	0.0607708	0	0	0
CG17234	0	0	0	0	0	0	0.096234	0	0	0	0.0643659	0.294492	0	0.0757382	0	0	0	0	0	0	0.395872	0	0	0	0	0	0	0	0	0.0683174	0	0	0	0.272314
Send1	0	0	0	0	0	0	0	0	0.106452	0	0	0	0	0	0.253915	0	0	0.364597	0	0	1.34039	0.145516	0	0	0	0	0	0	0.0928447	0.0630863	0.115569	0.062972	0.0472879	0.0628656
CR44787	0	0	0	0	0	0	0	0	0	0	0	0	0	0	0.404692	0	0	0	0	0	0	0	0	0	0	0	0	0	0	0	0	0	0	0
CR44788	0	0	0	0	0	0	0	0	0	0	0	0	0	0	0	0	0	0	0	0	0	0	0	0	0	0	0	0	0	0	0	0	0	0
CG4270	0	0	0	0	0	0	0	0	0	0	0	0	0	0	0	0	0	0	0	0	0	0	0	0.0563956	0	0	0	0	0	0	0	0	0	0
CG34049	0	0	0	0	0	0	0	0	0.0963241	0	0	0	0	0	0	0	0	0	0	0	0	0	0	0	0	0	0	0	0	0	0	0	0	0
CG17242	0	0	0	0	0	0	0	0	0	0	0.050249	0	0	0	0	0	0	0	0	0	0	0	0	0	0	0	0	0	0	0	0	0	0.0399777	0
CR43753	0	0.0619279	0	0	0	0	0	0	0	0	0	0	0	0.0212857	0	0	0	0	0	0	0	0	0	0.0143	0	0	0	0	0	0	0	0	0	0
CR43754	0	0	0	0	0	0	0	0	0.0824296	0	0	0.0701916	0	0	0	0	0	0	0	0	0	0	0	0.0363826	0	0	0	0	0	0	0	0	0	0
CG4271	0	0	0	0	0	0	0	0	0	0	0	0	0	0	0	0	0	0	0	0	0	0	0	0	0	0	0	0	0	0	0	0	0	0
CG31681	0	0	0	0	0	0	0	0	0	0	0	0	0	0	0.0780385	0	0	0	0	0	0.224703	0	0	0	0	0	0	0.0990399	0	0	0	0	0	0.0579635
CG42658	0	0	0	0	0	0	0	0	0	0	0	0	0	0	0	0	0	0	0	0	0	0	0	0	0	0	0	0	0	0	0	0	0	0
CG17237	0	0	0	0	0	0	0	0	0	0	0	0.0867795	0	0	0	0	0	0	0	0	0	0	0	0	0	0	0	0	0	0	0	0	0	0
robl22E	0	0	0	0	0	0	0	0	0	0	0	0	0	0	0	0	0	0	0	0	0	0	0	0	0	0	0	0	0.0796462	0	0	0	0	0
CG31949	0	0	0	0	0	0	0	0	0	0	0	0	0	0	0	0	0	0	0	0	0	0	0	0	0	0	0	0	0	0	0	0	0	0
CG16995	0.80241	1.23469	0	1.16392	0	0	0	0.544916	0	0	0.504929	0.220018	0.120959	0	0	0	5.83785	0	0.285273	0	0.443641	0.353193	0.665075	0.513192	0.444045	0.2497	0.239671	0.456257	0	0	0	0	0	0
CG9967	2.466	1.69755	2.5576	2.08436	1.86757	1.50257	1.35192	1.6159	1.61947	1.74335	1.42926	1.73491	3.61954	5.21697	4.15359	4.70276	3.99275	1.43139	2.53786	1.40976	1.67437	1.57105	1.41193	2.21357	2.10342	1.1107	1.2793	1.26513	4.0779	5.07733	6.69235	4.04832	5.96403	4.38085
eys	0.313792	0.419863	0.250091	0.45234	0.358487	0.168476	0.559271	0.602228	1.01042	0.633066	0.9505	1.57118	0.52444	0.317491	0.759709	0.208457	1.04774	0.225697	0.630555	0.759475	0.641163	0.315275	0.989457	1.03254	0.787354	0.350261	0.236353	0.637232	0.349632	0.50768	0.375588	0.428797	0.35615	0.91452
Rab5	72.9332	68.0252	72.4424	94.6574	81.5007	76.0748	70.6635	81.5075	89.9182	78.325	80.4251	88.5188	59.2405	77.1667	79.9202	61.7835	63.6254	77.2711	65.2808	64.6178	82.3895	74.2264	76.2681	100.206	79.5811	93.7653	80.1286	70.2527	64.5574	57.6569	63.6757	70.0753	75.862	56.2139
Axud1	4.50182	5.07162	5.57517	4.85867	5.06286	6.16309	5.56436	6.1265	5.91057	5.45354	5.64882	6.08007	6.84683	6.13665	6.17441	5.61507	5.42746	5.17173	5.12062	5.93037	6.12371	5.89746	6.69083	6.84571	5.16894	6.77525	5.73074	5.88791	5.76651	5.71436	5.5971	5.27015	6.44897	6.54789
CG3597	38.0357	43.4604	56.5203	49.3583	28.2723	50.5734	33.4691	22.9103	19.4779	30.1971	20.016	20.2002	42.8605	48.4493	69.0571	43.443	58.5177	45.1667	70.6248	52.665	35.0489	59.8817	35.3592	20.8071	26.9061	32.1542	28.5427	70.8932	60.1526	94.7705	48.8745	77.9208	41.5789	76.5807
CG3609	74.0562	64.8733	45.5615	44.2095	39.9094	75.9466	77.586	67.785	21.6474	48.8232	69.28	51.8116	80.5617	39.2573	77.3163	119.985	78.6699	46.5435	78.1863	55.5149	37.7553	57.7822	40.1211	25.8911	38.7286	94.1087	80.599	76.5899	94.3422	80.5344	61.237	95.7795	54.5726	75.615
CG15390	3.98562	3.25805	3.53884	2.70997	3.27269	6.34443	2.25989	3.66523	4.01057	6.59051	4.19868	3.41513	3.84894	3.82066	2.86987	3.53422	2.90864	3.43404	4.09593	2.70571	2.52495	3.01526	3.41961	3.85014	4.67705	4.26345	3.31097	3.89513	3.23557	3.86225	4.73502	3.97388	5.30016	3.19742
CR44982	0	0.324304	0	0.218368	0.527423	0.650657	0.566536	0.238545	0	0.686292	0.284195	0.144474	0.476564	0.334407	0	0	0	0	0	0.286157	0.194211	0	0	0.224658	0.083309	0.163965	0.188855	0.2568	0	0.100547	0.184194	0	0	0.200391
Atxn7	2.35501	2.61956	2.21048	2.32242	1.6686	1.75189	2.3453	3.24353	2.23841	1.87094	2.42311	2.83968	2.90847	2.86624	3.32337	2.92322	2.87981	2.58159	2.21923	2.11881	2.09165	3.12227	2.95437	3.24624	2.42254	3.13448	3.34757	2.77726	2.32083	2.70723	2.87646	3.21577	2.26264	2.69776
Eogt	3.83834	2.95309	4.42589	3.33546	3.71821	3.44023	4.53479	5.95598	3.28924	3.22546	4.84181	4.75305	5.59944	5.33709	4.51722	4.94582	5.47722	5.29143	4.18187	3.95062	4.10742	3.67877	5.16336	4.72935	5.53048	5.20163	6.12067	4.7271	4.19453	4.01673	3.73326	3.7736	3.89638	5.38596
CG9870	1.55	1.90803	1.70477	1.36506	3.10307	3.3496	1.97908	2.89466	3.30657	1.13562	3.23959	2.39065	1.51875	1.4756	1.38891	1.92846	0.904933	1.92311	1.79094	1.47314	2.92799	2.64375	1.80663	2.42323	2.6958	1.80878	2.12965	1.22758	1.49637	1.2201	0.677311	1.21789	1.93997	1.17899
CG3557	0.118431	0	0	0	0.148186	0	0	0	0	0	0	0	0	0	0	0	0.106375	0	0.105262	0	0	0	0	0	0	0	0.0353741	0	0.0415758	0	0.0517516	0	0	0
CG43750	0.104054	0	0	0	0.130196	0	0	0	0	0	0	0	0	0	0	0	0	0	0	0	0	0	0.0539028	0.0369715	0.0411301	0	0.0310796	0	0.0365284	0	0.0454688	0	0.0372094	0.0494671
VGlut	1.51803	2.10514	0.687082	2.29127	2.53255	1.85143	1.9773	1.59088	6.72868	3.9972	7.01691	10.74	2.41547	2.39869	3.69453	0.523612	4.40188	1.18845	2.18208	2.16286	4.05832	0.989903	3.06787	1.91778	4.49662	1.0935	0.862054	2.0247	1.61189	1.93121	2.02278	1.1602	1.77598	5.08734
CG18641	0	0	0	0.0669744	0.0808814	0	0.130319	0.438977	0.364256	0.0526221	0.377709	0.0886217	0.243607	0.444444	0	0.0846574	0.551574	1.24757	0	0.702124	0	0.071132	0.267888	0.344517	0.383268	0.201155	0.772302	0.105016	0.0907699	0.0616765	0.112986	0.0615648	0.184925	0.399495
CG31948	0	0	0	0	0	0	0	0	0	0	0	0	0	0	0	0	0	0	0	0	0	0	0	0	0	0	0	0	0	0	0	0	0	0
CG34448	0	0	0	0	0	0	0	0	0	0	0	0	0	0	0	0	0	0	0	0	0.101351	0	0	0	0	0	0	0	0	0	0	0	0	0
CG34447	0	0	0.0720456	0	0.0983544	0	0	0	0	0.0639902	0.0353313	0	0	0	0	0	0	0	0	0	0	0	0.04072	0.0558592	0	0	0.0469572	0	0	0	0	0	0	0
CG9886	6.30517	3.5495	7.49856	4.11086	4.57962	6.64666	2.76966	4.21221	2.99591	3.33008	2.41928	3.16254	7.88193	4.9777	5.00023	9.11691	5.56659	7.3777	5.85007	4.13421	7.68061	4.50143	5.87927	3.31128	3.84178	3.68491	5.36506	4.47209	9.09135	7.46864	7.29792	6.31268	11.3836	5.27849
CG44139	0	0	0	0	0	0	0	0	0	0	0	0	0.355964	0	0	0	0.212098	0	0	0	0	0	0.244653	0	0.18668	0	0	0	0	0	0	0	0	0
CR44912	1.39072	0.641981	1.65705	0.432275	0.870058	0.42934	1.02804	0.787028	0.783675	0.679281	0.687601	0.857991	0.83857	1.54462	0.801114	1.57851	1.12422	0.38344	1.11246	0.944111	1.40966	1.07125	0.648388	2.02597	0.87955	0.432774	0.91386	0.903739	1.26936	0.995201	0.668479	1.19208	1.49195	0.859491
dpp	4.12766	2.18541	4.71881	3.63285	3.69302	4.28187	2.74402	2.96384	3.48357	2.92661	2.34404	3.05765	4.66666	4.60088	2.40044	3.54574	3.36859	4.40537	4.24066	3.25409	5.09183	4.07815	2.91997	2.71244	3.22805	2.36523	3.07558	3.93874	3.31874	2.74203	2.61825	2.12413	2.46008	3.38653
CR45286	0	0	0	0	0	0	0	0	0	0	0	0	0	0	0	0	0	0	0	0	0	0	0	0	0	0	0	0.0352018	0	0	0	0	0	0
Slh	9.62401	8.90214	8.26796	8.35212	8.40534	6.89874	10.0605	8.90662	5.98161	9.12919	9.52652	8.87141	8.28714	6.56919	7.58135	8.31896	8.6812	6.2746	8.52947	9.26965	6.24065	10.9223	9.09041	6.47861	8.95224	11.0708	11.9078	9.65502	8.18166	9.50966	8.90214	10.0408	6.85366	8.96803
oaf	5.88769	7.67854	5.72538	4.166	6.06422	7.53656	7.43071	8.24858	8.26546	6.37114	6.80957	7.25981	6.03417	7.13927	6.2041	6.59809	5.44953	4.85016	5.39253	5.89796	6.58322	4.50363	5.65365	8.35513	6.44258	7.68063	5.86553	5.65741	5.73438	5.77181	5.97699	5.62459	6.67576	5.00067
CR44607	0	0	0	0	0	0	0	0	0	0	0	0	0	0	0	0	0	0	0	0	0	0	0	0	0	0	0	0	0	0	0	0	0	0
CG3528	0	0.201634	0	0	0	0	0	0	0	0	0.0588988	0	0	0	0	0	0	0	0	0	0	0	0	0.0465599	0	0	0	0	0	0	0	0	0	0
CR44112	0	0	0	0	0	0	0	0	0	0	0	0	0	0	0	0	0	0	0	0	0	0	0	0	0	0	0	0	0	0	0	0	0	0
CG3515	0	0	0	0	0	0	0	0	0	0	0.0344194	0.104985	0	0	0	0	0	0	0	0	0	0	0	0.0272087	0	0	0	0	0	0	0	0	0	0
CR44113	0	0	0	0	0	0	0	0	0	0	0	0	0	0	0.435639	0	0	0	0	0	0.313593	0	0	0	0.134519	0	0	0	0	0	0	0	0	0
Cyp309a1	9.50227	9.62875	4.56705	7.80417	11.9621	18.6923	4.71137	40.5279	2.42542	10.4712	9.8963	5.60021	29.0413	27.1201	51.1401	62.021	32.9947	3.99377	13.2349	3.9334	10.6782	4.90942	4.68233	9.26418	2.97735	24.3411	16.4409	8.07166	30.246	19.0451	31.471	27.5088	54.8653	25.9199
Cyp309a2	3.51389	6.46901	4.19833	5.26606	4.63226	6.00517	2.95173	5.6106	2.72769	5.31244	3.63828	1.67752	17.1679	20.1444	33.2139	21.6951	17.3026	5.88219	12.3811	3.5782	8.3262	5.04057	4.2257	5.30626	3.19958	11.4718	6.22239	4.89313	18.5035	16.2548	16.8355	16.8827	30.2024	15.7207
Rad1	0	0	0	0	0	0	0	0	0	0	0	0	0	0	0	0	0	0	0	0	0	0	0	0	0	0	0	0	0	0	0	0	0	0
CG34314	0	0	0	0	0	0	0	0	0	0	0	0	0	0	0	0	0	0	0	0	0	0	0	0	0	0	0	0	0	0	0	0	0	0
insv	19.4478	11.5179	14.5548	10.3648	5.95216	11.8782	16.7361	9.2639	10.5873	15.8888	9.84184	6.28202	11.1782	11.9507	13.2088	13.529	12.8182	13.1158	15.4199	15.672	9.47605	11.3932	4.09505	6.58693	10.2313	11.2113	5.34915	16.3657	14.293	17.6548	21.6124	22.2867	18.7872	23.014
Elba2	0.31	1.07326	0.142064	0.32119	0.290913	0.598143	0.729135	0.087717	0.499105	0.252361	0.313509	0.159377	0.525721	0.0819778	0.446435	1.52247	0.452467	0.641036	0.551057	0.315673	0.714144	0.596975	0.401473	0.16522	0.336974	0.0602927	0.416671	0.377718	0.788993	0.332756	0.30479	0.147623	0.249425	0.147374
CG3214	859.045	987.129	672.911	791.759	613.478	734.158	756.248	601.565	582.381	950.288	606.425	345.075	1236.43	1266.42	1357.61	1395.6	1188.93	726.395	1025.88	909.166	739.224	870.092	479.601	346.286	579.351	550.541	564.897	472.317	1306.59	1731.92	1999.21	1780.28	1687.7	1330.46
Arpc5	15.8963	13.6444	14.5696	22.5203	20.7019	12.0183	21.2924	28.7626	14.9729	20.5113	20.9489	21.2005	10.5143	7.77824	9.75912	14.6344	13.0153	9.54085	13.7442	15.1227	19.9293	18.9204	26.2727	17.1366	17.0551	27.5099	29.2311	22.0039	11.5785	9.54401	9.87599	9.11475	8.15937	9.45922
Drp1	18.5584	15.7681	18.5626	20.1479	18.8797	14.0119	23.967	23.3794	13.738	21.3151	21.8149	24.8348	19.3701	14.1682	18.0757	19.2503	18.2816	17.019	18.4669	17.912	22.7891	21.221	27.9009	19.5957	17.5579	31.7947	31.1382	21.2851	18.5536	19.3048	18.2112	18.7703	15.74	20.3497
CG15394	11.9392	4.30931	17.0222	18.3262	9.7748	20.022	37.3432	28.5279	49.4798	29.758	53.3327	39.8098	12.4429	7.79573	9.81158	5.79121	37.5333	22.3519	10.2186	11.4073	11.6808	22.5457	39.7054	41.1647	53.5439	43.9191	31.0825	29.7532	21.0083	9.2118	10.9496	15.021	8.06454	12.1227
CR44790	0	0	0	0	0	0	0	0	0	0	0	0	0	0	0	0	0	0	0	0	0	0	0	0	0	0	0	0	0	0	0	0	0	0
CR44789	0	0	0	0	0	0	0	0	0	0	0	0	0	0	0.107487	0	0	0	0	0	0	0	0	0.0596696	0	0	0	0	0	0	0	0	0	0
CG15395	0.0937662	0	0	0.0971508	0	0	0	0	0	0	0.0842912	0	0	0	0	0	0	0	0	0	0	0	0	0	0	0	0	0.038083	0	0	0	0	0	0
CG43403	0	0	0	0	0	0	0	0	0	0	0	0	0	0	0	0	0	0	0	0	0	0	0	0	0	0	0	0	0	0	0	0	0	0
CR45705	0	0	0	0	0	0	0	0	0	0	0	0	0	0	0	0	0	0	0	0	0	0	0.024975	0	0	0	0	0	0	0	0	0	0	0
CR43852	0	0	0	0	0	0	0	0	0	0	0	0	0	0	0	0	0	0	0	0	0	0	0	0	0	0	0	0	0	0	0	0	0	0
CG9962	0	0	0	0	0	0	0	0	0	0	0	0	0	0	0	0	0	0	0	0	0	0	0	0	0	0	0	0	0	0	0	0	0	0
CG43851	0	0	0	0	0	0	0	0	0	0	0	0	0	0	0	0	0	0	0	0	0	0	0	0	0	0	0	0	0	0	0	0	0	0
CG33125	0.0289631	0.133699	0	0	0	0	0	0	0.0233155	0.0235779	0	0	0	0	0	0	0	0	0	0	0	0	0	0	0	0	0	0	0	0	0	0	0	0
Prosbeta4R1	0	0	0.127772	0	0	0	0	0	0	0	0	0	0	0	0	0	0	0	0	0	0	0	0	0	0	0	0.0416392	0	0	0	0	0	0	0
Or23a	0	0	0	0	0	0	0	0	0	0	0.0381568	0.0581926	0	0	0	0	0	0	0	0	0.0782257	0	0.0439764	0	0	0	0	0	0	0	0	0	0	0
Prosbeta4R2	0	0	0	0	0	0	0	0	0	0	0	0	0	0	0	0	0	0	0	0	0.0647369	0.077308	0	0	0	0	0	0	0	0	0	0	0	0
CG9879	0	0	0	0	0.126333	0	0	0	0	0	0	0	0	0	0	0	0	0	0	0	0	0	0	0	0	0	0.0301575	0	0.0354446	0	0	0	0	0
Gr23a	0	0	0	0	0	0	0	0	0	0	0	0	0	0	0	0	0	0	0	0	0	0	0	0	0	0	0	0	0	0	0	0	0	0
CG31690	1.67434	1.64448	1.99172	1.51332	1.42638	1.31974	1.7955	1.29026	1.49124	1.50803	1.313	1.70941	1.93325	1.78992	2.50814	1.43077	1.72787	1.76798	1.64647	2.07984	2.26505	2.11688	1.19954	1.02528	1.32366	1.57973	1.38327	2.02562	1.71332	2.73623	2.05483	2.10359	1.87266	2.13391
CG15398	0	0	0	0	0	0	0	0	0	0	0	0	0	0	0	0	0	0	0	0	0	0	0	0.0827211	0	0	0	0	0	0	0	0	0	0
CG31689	88.9977	74.3777	108.718	112.439	90.1735	101.937	93.2802	91.7246	98.2245	100.899	93.5539	120.188	100.421	109.787	116.685	82.1417	87.8241	116.746	108.231	86.4741	120.543	108.002	100.215	86.2724	83.16	128.058	111.44	91.4975	76.5631	86.5549	129.061	78.3358	128.104	86.9854
mir-4914	0	0	1.1282	0	0	0	0	0	0	1.00206	0	3.37517	0	0.651026	2.36357	0.537364	0.552809	0	0	0	0	0	0.637658	0.437366	0.48656	0	0.367665	0	0.432123	1.76172	0.537886	1.17235	1.32054	0.585185
Hrs	15.7969	15.2788	14.0273	18.5353	14.4264	11.4637	24.044	23.1272	13.4103	21.8449	21.8727	18.1697	11.8447	8.61525	18.3045	12.4848	11.2773	13.9148	13.311	13.4259	17.8081	17.022	29.056	19.2003	16.8674	34.9534	28.8617	17.2646	9.79478	13.2325	11.5645	14.5176	8.71556	10.3188
CG9961	3.69621	2.34917	3.46139	6.90999	5.22808	2.97676	5.77778	4.91105	4.65727	5.42921	8.37901	3.13961	0.969014	0.127493	1.44003	0.456013	0.793895	3.32315	2.92811	2.94563	5.7013	3.62526	7.24274	2.82647	5.49475	7.81398	5.73609	4.66681	1.0437	0.766673	0.983136	0.535699	0.862018	0.687593
Cwc25	10.5006	10.7031	11.3407	7.3455	10.1261	10.0143	9.34882	12.5662	10.3375	12.7406	8.41743	7.97749	6.95674	7.81758	7.23462	8.40897	7.95981	10.5111	10.6408	10.8063	9.42954	8.39028	9.87449	9.60081	9.75538	9.41796	9.24944	9.64337	7.95955	9.38089	8.7094	8.5358	8.41888	7.5039
Pgk	230.812	238.065	221.793	224.329	158.213	166.851	204.149	207.294	143.335	221.97	162.327	111.276	224.016	185.27	164.668	237.087	241.219	188.06	313.977	262.28	164.93	273.04	148.601	101.418	154.989	159.576	186.63	173.359	209.541	373.544	294.677	313.253	243.148	261.311
Bacc	280.712	248.461	313.627	296.535	239.379	308.452	236.418	204.441	333.034	265.114	251.581	223.533	200.381	299.16	264.328	216.582	212.273	225.24	231.109	210.218	259.179	233.338	212.171	318.598	286.115	246.371	175.358	213.948	219.627	222.203	283.091	290.909	317.527	235.168
CR44772	0.976435	0.751235	2.23736	1.51752	1.83263	2.26083	1.64044	1.10516	2.35811	1.19232	0.877766	2.00801	0.36798	1.80749	0.93745	0.213132	0.87703	1.34608	1.73571	0.66287	0.44988	2.68621	1.01164	2.60205	1.73683	1.89909	1.1666	1.58631	0.514171	1.16457	0.853355	3.02239	1.2221	0.928395
CG9960	0	0	0	0	0	0	0	0	0	0	0	0	0	0	0	0	0	0	0	0	0	0	0	0	0	0	0	0	0	0	0	0	0	0
Snapin	0	0	0	0	0	0	0	0	0	0	0	0	0	0	0	0	0	0	0	0	0	0	0	0	0	0	0	0	0	0	0	0	0	0
Trn-SR	4.00104	2.97896	3.10523	3.24282	2.5435	2.78915	3.51273	3.94418	2.90917	3.57232	3.9013	4.04766	3.35615	3.75438	3.86195	2.97214	2.86918	3.64749	3.81424	2.75999	3.92472	4.11875	4.22889	3.92092	3.44364	3.28841	3.8165	3.76113	2.97907	3.2326	3.60951	3.93355	3.01154	3.25197
CG3077	6.94017	5.68966	10.4278	24.637	16.5847	5.70764	12.8448	14.6157	12.456	13.2908	19.0235	19.2247	5.61685	7.91282	31.2036	10.0329	6.94898	12.3907	7.3819	9.19121	24.3752	17.2773	19.6558	14.6339	15.0881	25.1817	23.5671	10.3046	7.24921	6.51333	7.85515	7.99146	6.28587	5.13835
aph-1	15.6614	18.3438	17.7823	26.2776	20.0349	14.4328	20.0283	15.345	17.6882	17.6018	20.1727	19.3083	14.6233	15.3918	19.3001	15.5618	15.0118	20.9459	15.582	16.3448	19.7089	22.5072	21.6752	16.8187	18.4332	24.9138	22.9705	20.0794	16.5761	15.1104	12.3084	17.1424	14.1267	12.7795
Taf10b	26.2408	18.1222	24.8084	23.1205	17.8387	19.4552	24.1602	17.7733	14.9698	25.9032	22.1961	17.2797	29.2781	21.7466	28.1687	30.1269	28.9514	18.7995	20.3846	24.6872	21.8955	26.1474	18.196	14.8298	17.968	20.8968	21.2918	20.5601	27.2731	30.3603	35.4832	37.98	32.5104	28.3877
Taf10	82.4242	68.643	84.4895	70.2333	54.2916	52.9898	78.5768	43.1936	46.9935	73.1986	57.2554	41.6889	81.0382	80.3664	80.0814	89.6896	84.6763	51.8891	72.6392	68.8496	53.632	62.7043	51.2739	36.3448	46.2188	54.905	57.0977	53.1519	79.465	110.9	118.789	117.171	92.9734	80.9371
colt	94.286	85.4124	93.7979	72.8215	67.302	71.6835	82.9584	60.9679	77.4743	92.4752	64.1311	55.5751	102.768	94.0689	86.3183	101.639	89.4273	87.9466	77.9646	94.2601	62.3881	70.5456	57.8339	33.4177	69.9029	63.1336	62.1389	57.7905	101.165	116.406	127.462	101.415	131.595	100.277
CG2862	93.023	75.8377	94.5335	79.9791	88.6227	67.7642	76.77	81.089	59.3818	75.0626	70.7862	60.634	85.7352	67.67	77.0878	93.615	86.7777	86.8424	88.1909	79.5472	71.8831	95.0008	69.8312	48.9405	69.7338	65.3861	85.6945	84.9082	88.3432	94.9853	80.8695	83.8553	80.8279	69.7485
CG15399	0.702109	0.216071	1.02962	0.872943	0.527103	0.216754	1.03802	0.794669	0.565203	0.571563	0.31558	0.866321	0.423356	0.816943	0.808892	0.551711	0.693695	0.774325	0.374421	0.953278	1.29395	0.772611	0.581941	0.199575	0.555056	0.218488	0.629136	0.798449	0.690138	0.535927	0.674969	0.468087	0.803435	0.534052
Syt1	3.34125	4.87762	2.4903	5.61759	5.22204	5.64872	5.79024	4.55747	21.3306	7.16365	16.2008	24.6322	6.25442	7.02976	8.95377	2.01963	9.97068	4.01562	6.50507	5.73298	11.0749	2.30302	7.24046	5.96638	10.411	2.13283	2.4566	5.38343	4.31803	5.23745	4.84006	2.78009	5.32201	10.2055
CR43821	0	0	0	0	0	0	0	0	0	0	0	0	0	0	0	0	0	0	0	0	0	0	0.122326	0	0	0	0	0	0	0	0	0	0	0
daw	16.9752	20.1218	31.5068	18.2488	19.954	18.1614	25.9825	16.8064	20.3123	23.7143	17.1554	24.3172	12.1802	19.999	19.5751	10.1798	14.6104	20.0305	22.3636	26.4159	14.6299	25.7382	20.4512	16.936	12.7054	18.3067	17.6666	22.6984	13.0132	17.7352	18.5985	9.87252	11.4563	22.3568
CG2964	0	0	0.0549487	0.124232	0	0.0925416	0.161154	0	0.0965237	0	0.107788	0	0	0.063416	0.0767446	0	0.0269244	0.165296	0	0.081399	0	0.0659721	0.0310569	0	0.0236977	0.0932819	0.017907	0.0486989	0	0.0572026	0	0	0.0214388	0.0570025
G6P	0.193815	0.447343	0.26646	0	0.242509	0.149586	0.260493	0.329049	1.4042	0.315556	0.52269	1.79359	0.219124	0.256267	0.124051	0.042305	0.43521	0	0.258395	0	0.892979	0	0.251005	0.27546	0.49797	0.0753911	0.115781	0.236153	0.306177	0.231158	0.0846923	0.138443	0.242578	0.184279
Duox	0.672214	2.50247	1.6496	2.35904	1.35661	1.50623	1.87981	1.12898	1.44885	1.32394	1.07212	1.36753	1.2258	2.22491	3.23382	4.05158	2.11323	1.61424	2.33204	1.44264	1.99816	1.45557	0.808784	0.708834	1.25141	1.07966	1.37957	3.09128	2.19236	2.92761	2.21727	3.00492	2.32629	2.84521
CG3123	0	0	0	0	0	0	0	0	0.0474989	0	0	0	0	0	0	0	0	0	0	0	0	0	0	0.020965	0	0	0	0	0	0	0.0257834	0	0	0
CG3119	0	0	0.0820194	0	0	0	0	0	0.144076	0.0728489	0.0402225	0.122686	0	0.047329	0	0	0	0	0.0795368	0	0	0	0	0	0.070745	0.0696187	0.0801868	0	0	0.0853836	0.0391039	0	0	0.0425425
Cpr23B	0	0	0	0	0	0	0	0	0	0	0	0	0	0	0	0	0	0	0	0	0	0	0	0	0	0	0	0	0	0	0	0	0	0
CR45342	0	0	0	0	0	0	0	0	0	0	0	0	0	0	0	0	0	0	0	0	0	0	0	0.407053	0	0	0.171092	0.232646	0	0	0	0	0	0
CG2975	0.307079	0.189005	0.112581	0.127266	0.307384	0	0.206362	0.486587	0.494402	0.199986	0.469284	0.5473	0.416614	0.58468	0.196546	0.134056	0.275818	0.169332	0	0.166773	0.226373	0.202749	0.795381	0.851052	0.509803	0.812255	0.935556	0.548767	0.215603	0.117198	0.0536744	0.146233	0.131774	0.554746
CG18558	0	0	0.11699	0	0	0	0	0.0722347	0	0.0519545	0	0	0	0	0	0	0	0	0	0	0	0	0	0.0680293	0.0504541	0	0.0381252	0	0.0448092	0	0	0	0	0
CG18557	0.539178	0	0.296508	1.00555	1.34928	0.166454	0.507269	1.46462	0.434042	0.0877852	0.82398	1.70017	0.243834	0.114066	0.27608	0.188303	0.339001	0	0.191689	0.73206	0.496839	0.830646	2.56965	1.72419	1.91812	2.43289	1.67488	0.78835	0.719265	0.154335	0.141364	0.154055	0.269933	0.20506
CG3117	0.190152	0	0.0871414	0.394032	0.951702	0.146759	0.191677	2.47503	0.765369	0.0773982	0.341875	0.977606	0.143322	0.100569	0.18256	0.0830111	0.256191	2.0971	0.253511	0.387264	0.438051	0.418492	2.21635	4.08759	1.616	1.10949	1.81748	0.656455	0.367145	0.0453578	0.0830917	0.0452757	0.135996	0
CG2983	0.708233	0.272445	0.811408	0.275174	0.553855	1.09322	0.713913	0	0.356333	0.288274	0.23875	0.121372	0.467084	0.187288	0.339978	0.231885	0.119275	1.22044	0.314739	0.240398	0.163155	0.681931	0.0458607	0.346011	0.48991	0.68873	0.317312	0.323604	0.652648	0.0422345	0.23211	0.21079	0.791448	0.378781
CG3104	1.81891	1.65384	1.43978	1.62758	2.79314	4.40292	2.97249	3.13484	5.05827	4.98058	4.255	4.25061	3.39622	1.48673	2.80465	1.64223	2.74765	2.5075	1.65339	3.7044	1.71417	2.82037	6.42442	4.39178	4.33019	5.11351	4.72908	4.0799	3.61353	1.89326	3.10702	0.964603	2.32089	2.3583
RpS21	190.189	182.483	195.351	150.923	186.904	139.363	264.577	247.614	137.063	195.547	178.815	173.328	175.251	118.25	133.692	215.547	194.526	145.113	229.255	205.051	145.37	264.179	184.732	129.099	147.693	196.712	226.573	242.73	196.489	199.036	163.874	180.614	133.713	182.726
CG2991	21.7293	20.4182	27.0755	27.4263	25.6946	32.2248	25.1931	25.173	25.95	21.6878	28.227	27.4989	27.0993	39.4926	34.322	28.3238	29.3983	29.4381	23.3454	26.0753	32.282	23.7235	27.8494	29.7919	22.6256	28.953	25.3804	24.1068	26.9919	33.1984	32.6591	29.4508	32.6794	30.52
CG31694	96.4156	64.3625	96.2859	96.5342	83.6079	65.3781	74.7222	70.2696	91.9807	80.2376	89.5304	80.0678	48.1496	49.4163	75.0127	42.9517	42.8669	95.622	69.5999	72.5078	92.5617	121.247	141.957	75.6661	108.943	80.5344	91.4368	70.8211	53.4565	49.3437	56.3857	55.7686	54.9079	48.8376
CG8813	0.347818	0.356799	0.318791	0	0.145068	0.178963	0.311651	0.524896	0.186664	0.0943823	0.364783	0.238426	0.349544	0.245276	0.074207	0.253067	0.156205	0	0.618283	0.157415	0.534177	0.127581	0.12012	0.0411948	0.229141	0.180395	0.277038	0.423798	0.407009	0.719044	0.405301	0.331265	0.207299	0.440941
CG8814	28.781	22.6418	29.3497	32.1034	26.6845	28.7169	29.4039	26.7792	37.1016	26.0681	31.6708	25.6834	37.5228	31.4382	24.9351	30.845	29.5482	50.0427	25.7535	30.892	29.1492	31.3144	31.6657	21.3278	29.1587	34.2418	39.4203	26.696	26.4198	23.1626	22.6888	22.318	29.5086	26.533
Prx6005	8.60079	9.51215	9.36107	7.93658	9.92088	10.5794	6.41202	7.9094	6.05824	6.78281	7.24846	8.38304	9.11616	8.67127	8.51545	12.9654	10.6825	7.4105	10.0333	6.56865	8.79226	10.6475	6.54396	7.54443	6.95877	6.16841	7.54632	11.08	9.62414	9.23213	8.16262	10.1114	8.21771	9.13596
CG31950	3.16525	3.78814	4.35164	5.46584	3.3004	0.81431	5.55407	7.36409	1.6987	3.72193	4.58426	3.85734	2.51826	1.30205	2.81378	3.99185	1.34254	1.93934	4.37621	4.77508	3.88894	4.25711	5.83002	1.56202	2.22427	3.83051	6.6705	4.57089	2.16061	2.76841	1.53682	2.59592	0.943242	2.59153
betaggt-II	7.83226	9.19411	10.0649	13.4692	11.0124	6.23187	14.5964	14.7137	6.37003	12.4233	12.4122	11.8449	10.1026	6.27765	12.2483	9.6583	11.3501	9.12764	12.6309	9.53783	11.5327	16.7932	15.0163	7.8036	9.79842	19.0964	21.1029	12.2651	9.4675	11.903	9.49127	10.1511	7.21858	10.134
NTPase	144.655	140.935	148.403	130.88	103.752	118.369	142.333	103.292	116.182	130.802	127.643	87.667	150.301	131.282	121.475	140.684	140.277	137.879	154.959	142.074	121.842	124.827	93.0972	90.4267	124.168	135.572	113.29	91.0203	134.732	168.793	185.752	176.215	167.398	162.784
lilli	6.87879	6.24005	8.76265	9.10369	8.90709	6.84873	8.78375	7.26741	6.78363	9.44243	9.43233	6.68817	9.30944	7.282	12.8176	7.18612	6.87371	8.11532	8.27456	8.5551	10.0454	6.56185	9.47608	7.26652	6.13614	10.6097	9.7	8.54968	7.7458	9.21568	10.1561	9.73888	8.78294	6.93423
Rbp9	46.1451	42.2006	49.2728	78.1167	52.7951	41.7796	49.6626	35.2038	52.8988	64.6163	58.2907	39.7863	56.9786	72.8218	97.5157	56.0125	52.1576	52.8799	39.0729	37.4707	75.1938	38.9061	47.6453	49.9076	48.8031	60.9912	44.2927	31.882	44.2205	56.5712	64.3536	70.0899	65.0502	54.14
Ts	0.257892	1.85186	0.236369	0.801603	0.322684	1.19424	0.346614	0.389187	0.0692016	0.0699804	0.115916	0.589275	0.323965	0.0454654	0.0550212	1.65122	0.30885	0.711045	0.611239	0.466865	0.0792137	0.378384	0.400787	0.366529	0.0339797	0.26751	0.308118	0.872854	1.14676	0.656172	0.225385	0.736856	0.153703	0.204337
Rrp1	1.13394	2.72194	1.12245	1.73881	1.41883	1.26025	1.31068	3.18291	1.89869	1.14465	2.07949	2.67394	1.91448	0.959568	0.958029	2.29691	1.2222	2.62621	1.33036	1.41643	1.79723	1.49737	2.34966	3.65837	2.4204	2.08193	2.65538	2.21064	1.56045	0.930467	0.713527	0.583188	0.924532	1.03503
gammaTub23C	9.50678	8.37282	8.48409	11.3404	8.06059	9.75089	11.6005	10.3353	10.8754	11.2014	13.8593	9.73234	7.91973	8.99753	7.0856	7.91813	6.9379	9.82933	8.17169	9.17125	9.45187	9.49785	11.1132	12.0448	11.2735	11.9698	11.2649	8.53521	7.59695	7.96677	8.19913	8.51823	8.43194	8.08758
CG9641	1.97535	4.23692	2.57858	2.79089	3.81979	2.58714	2.85605	4.53927	4.09589	1.85171	3.06719	4.39051	2.88749	2.91261	2.52864	4.25944	3.14526	2.80568	3.08576	2.682	2.86825	3.95219	4.83736	5.21083	4.68487	4.28431	3.95131	2.82015	4.98025	2.59868	2.98189	3.13557	2.99677	3.50021
CG3165	3.67325	3.90267	3.68734	5.52754	5.79986	5.94001	8.81599	18.0159	7.95573	8.47244	9.98484	8.63308	4.54843	5.87449	3.30269	6.07063	5.18462	5.78725	3.42026	4.39358	5.88313	5.87067	19.6628	25.9788	13.3096	18.0306	16.3529	5.61234	6.53965	3.3379	4.2421	3.70668	4.40978	4.61513
CG9643	14.8917	11.5586	10.3877	10.5138	8.07985	8.34034	15.144	10.4411	11.1393	12.7666	10.7806	11.4729	8.14502	8.22458	6.57924	11.6213	10.2389	10.9005	9.95614	11.9883	7.77197	12.3266	13.1759	11.1912	12.502	14.0459	13.8163	12.9529	11.5197	10.7509	11.2294	10.5431	8.67124	9.27232
Chd1	11.0861	12.0684	11.4047	8.92968	9.54893	10.1205	10.8966	10.832	7.30691	10.56	10.8769	9.0492	12.6599	9.95549	10.2655	11.6413	11.3031	9.42731	13.2213	11.3907	10.1506	11.2295	9.44065	10.0573	8.40885	11.9291	11.3605	11.6108	11.0629	13.9241	12.777	13.1939	11.9498	11.9567
Bem46	5.81921	6.24711	6.01576	4.97765	3.72527	7.10244	6.09324	6.05027	5.39263	5.34314	5.90028	6.9112	8.46612	6.87118	6.92946	7.65068	8.41757	5.97	4.69099	4.77731	4.48933	4.54205	4.87231	4.85655	5.91099	5.84321	6.89189	5.55139	7.67258	6.94041	6.44582	5.60671	7.04133	7.43082
okr	0.884491	1.79404	1.06862	1.83284	1.30793	1.24118	1.51299	1.41063	1.52114	1.37461	2.27692	2.81108	1.45453	1.48845	1.51823	1.64981	1.58889	1.55188	1.25067	0.927972	1.70417	1.45996	1.74946	1.92848	1.82756	2.18943	1.93337	1.17568	1.65132	1.16999	1.21221	1.20616	1.39456	1.33791
CG3558	22.6448	17.2989	22.9333	30.3515	24.2911	17.3123	35.5138	28.3503	22.2706	34.4992	35.3119	28.3365	18.8793	17.5836	37.8241	19.9461	21.3229	21.7933	22.3815	21.1376	30.168	23.038	37.5852	30.8366	24.2141	56.0503	42.09	25.4223	19.4895	23.7465	26.7218	29.019	20.9224	18.9663
CG17265	1.17091	1.91092	1.07319	1.02936	1.06552	1.86218	1.62143	2.16863	1.82806	1.18428	0.972851	1.28911	1.01626	1.1635	1.0901	1.3631	1.03578	1.76093	1.35608	1.63797	1.14436	1.48372	1.61751	5.48417	1.61291	1.79427	1.52613	1.51316	1.2207	0.863301	0.651203	1.0814	0.621732	0.809677
CG17224	111.966	90.3197	100.133	108.633	133.118	111.105	100.34	134.615	119.784	114.92	99.7611	119.452	99.1012	172.84	150.137	83.8881	122.842	91.4382	101.145	97.1291	101.213	121.513	116.041	140.908	110.412	123.809	106.859	129.928	137.339	83.7633	118.179	109.921	77.926	127.944
CG17264	5.21802	6.11743	4.09933	4.54822	8.03169	6.39246	4.56412	15.046	6.43417	6.50657	7.33394	8.97065	11.4867	16.4928	14.7375	7.44847	16.3108	4.56725	7.28795	10.1772	7.5177	6.1977	8.58123	12.4338	8.18479	9.60096	8.53499	14.4482	12.6482	9.08812	13.4456	11.3593	5.67192	14.1751
alpha4GT1	10.8012	11.8418	12.1891	13.2894	13.6838	12.4003	8.16585	13.3712	13.0425	11.101	9.95246	12.9109	13.2292	17.9233	16.7647	11.2872	13.9763	12.4705	13.0201	9.8073	15.365	12.5543	11.0857	11.9691	12.3014	10.2937	11.3118	13.2155	12.8921	13.7196	13.2156	11.7981	13.1325	13.1902
CG3542	6.37068	4.84011	5.87551	5.89932	6.97484	5.28564	5.56554	5.90363	6.3144	5.63995	5.74482	6.35951	5.76207	6.14913	6.1673	6.86591	5.32873	7.13573	7.11323	6.10885	5.72367	5.78357	6.37351	6.81905	6.40565	6.10232	6.25562	5.75706	5.85671	6.42043	6.19402	5.74516	5.79504	6.43583
CG3605	25.4781	27.33	23.3518	19.7425	21.1449	17.6343	21.3513	18.6879	16.9355	22.0393	18.4468	15.7214	19.2684	18.4684	17.7972	21.6239	20.2125	19.4932	19.7712	21.4227	19.2666	22.2489	16.5259	19.5759	17.7221	17.5406	16.894	19.8728	20.2644	23.8983	24.6025	25.6615	20.1643	20.5151
CG17219	11.4507	12.22	11.1722	10.2375	10.5146	12.2586	11.3564	8.46598	14.1242	10.0734	8.38432	9.30528	5.01134	5.22587	3.84183	5.60351	4.89366	8.14741	7.7972	8.14965	9.53043	9.95848	6.69719	11.7136	11.3885	6.1065	6.86797	8.02619	4.92751	4.84601	4.43874	5.4089	6.04307	3.90715
CR44147	0	0	0	0	0	0	0.316086	0	0	0	0	0	0	0	0	0.102667	0	0	0	0	0	0	0	0	0	0	0.070245	0	0	0	0	0	0	0
GABPI	12.033	10.4608	11.5273	13.3831	11.2283	9.02471	14.7565	14.4658	11.438	13.1163	14.0256	14.2136	12.1952	10.4271	10.443	10.6841	12.6094	9.55942	11.1784	9.04572	12.529	12.9421	14.58	12.5608	12.3881	16.1311	14.4781	13.6952	11.2408	11.319	12.269	12.0755	10.6724	12.0874
CG17258	0.161659	0.0621875	0.18521	0.251242	0.404548	0.062384	0.325911	0.731884	0.162671	0.197402	0.563129	0.360152	0.0913845	0.213749	0.155205	0.105859	0.0181502	0.111429	0.0718414	0.274363	0.186206	0.133419	0.355913	0.215398	0.287551	0.471622	0.410429	0.279045	0.0709388	0.0578419	0.0883012	0.192457	0.101166	0.153706
CG17259	16.348	18.2608	13.5408	12.9859	13.1065	10.6546	22.257	35.4987	8.33483	18.4345	18.9144	20.7526	18.2089	9.28675	12.4787	17.181	19.6599	15.1915	15.6064	19.0723	10.1544	26.2515	22.1128	17.5981	15.0301	24.9655	29.0808	27.8622	16.0268	19.5845	14.0757	18.0208	7.72975	18.2207
CG17260	13.5601	7.49654	10.3446	12.2829	10.0582	7.39489	13.2051	10.385	9.60869	10.1134	10.511	10.3529	9.54734	8.63192	11.3297	10.4924	9.48116	9.17888	9.23765	9.92211	8.60455	10.2755	10.011	11.2518	11.6829	12.4445	10.8653	9.66272	9.97673	11.2338	12.7734	13.1854	11.0629	9.30301
cnir	5.71231	7.97206	6.08789	8.6713	7.14746	7.38208	6.87404	6.76609	8.02056	7.13751	6.389	5.28169	4.90626	7.51782	6.12195	5.56736	4.59384	7.69169	5.66747	5.59139	7.09995	6.43209	5.91829	8.73225	6.66883	4.96075	4.95989	4.80196	6.34243	6.52773	6.61767	7.6546	7.93334	4.92604
CG17221	150.305	133.558	131.369	112.098	101.15	97.7156	149.281	99.9261	97.1241	148.593	123.37	68.2242	128.495	133.565	152.234	144.65	121.837	113.87	145.446	134.487	118.413	117.79	91.681	75.8257	106.219	125.729	101.437	89.5892	138.639	165.924	212.718	191.256	178.364	161.128
CG17261	0.2663	1.02441	0.61019	1.10365	0.66641	0.822119	1.34218	0.452111	0.857495	1.95108	1.19695	0.821459	0.501791	0.352108	0.426114	0.174381	0.298988	0.734228	0.59172	0.361565	0.245389	0.879122	0.413854	1.08813	0.473682	0.932282	0.755639	0.86526	0.373943	0.69874	0.6982	0.19022	0.523758	0.506397
v(2)k05816	1.09171	10.5154	1.5074	2.33569	5.92522	5.71205	4.49716	5.10302	1.76909	4.73219	1.66328	3.21698	4.95847	4.23674	2.30497	1.54737	13.3587	1.64182	5.17923	2.25226	22.6282	2.6211	1.29266	1.64732	0.655702	2.13985	1.80828	6.89858	4.02662	7.71765	3.71729	1.14779	1.02416	6.03255
CR43708	0.72772	0	0	0	0	0	0	0	0.58582	0	0	0	0.548499	0	0	0	0	0	0.646799	0	1.34115	0	0	0.258568	0	0	0.217362	0	0	0	0	0.346544	0	0.345959
snRNA:U5:23D	0	0	0	0	0	0	0	3.99882	0	0	0	0	0.665735	0	0	0	0	0	0	0	1.62781	0	0	0	0	0	0	0	0.310073	0	0	0	0	0
CG3523	185.444	294.064	258.918	244.402	200.708	341.401	138.173	190.975	111.99	175.687	151.348	166.996	233.069	271.619	344.249	159.416	290.871	217.376	422.196	212.581	94.9767	460.276	124.617	129.68	147.849	171.407	102.539	445.071	271.441	338.949	496.893	477.699	186.551	492.45
toc	7.85763	8.85077	8.66107	8.97136	9.40766	8.98972	8.86976	8.30062	9.11196	9.34828	9.81521	8.23793	8.26049	8.06174	9.59836	7.69005	7.2745	9.1756	10.1426	9.30189	13.071	9.58479	9.25836	10.6823	8.91996	11.331	10.2592	9.59913	7.5001	8.02649	9.29089	7.9239	7.86399	8.70645
PpD6	0	0	0	0	0	0	0	0	0	0	0	0	0	0	0.055809	0	0	0	0	0	0.0803479	0	0	0	0	0	0	0	0	0	0	0	0	0
CG15403	0	0	0	0	0	0	0	0	0	0	0	0	0	0	0	0	0	0	0	0	0	0	0	0	0	0	0	0	0	0	0	0	0	0
CG12400	320.094	385.292	308.968	249.208	212.797	162.667	352.254	258.314	137.885	330.172	213.764	109.815	461.922	288.073	268.73	500.416	491.067	250.361	457.521	418.728	243.467	391.336	171.56	91.7744	177.184	211.575	222.693	202.656	503.16	708.841	788.278	708.641	427.235	550.724
Mad	12.4118	11.219	11.3449	13.4922	13.8752	14.4476	13.6052	16.5429	14.6052	14.8799	15.6846	12.646	10.0196	11.9451	14.1736	12.6873	12.4884	12.342	12.2674	11.9252	14.6245	13.7327	19.043	22.701	14.9462	17.9401	20.4507	13.4703	11.9525	11.8587	11.3066	12.7093	13.2304	11.6399
gkt	3.80308	3.20653	3.0082	3.99434	3.91115	2.4125	2.66075	2.77136	4.40354	3.05355	4.33202	3.42836	1.57067	1.68077	1.50051	2.22881	1.82494	3.16006	2.87084	2.19275	3.26442	3.32504	3.42745	3.23938	3.7273	2.99922	3.82796	2.39098	2.01177	2.01316	1.57079	2.40646	1.95613	2.00612
Hydr2	11.1374	13.8346	10.839	18.9666	17.5841	17.5042	26.9169	33.7832	22.6914	21.2982	26.2678	36.2296	18.8037	19.5349	18.7674	18.0868	21.0803	11.8363	14.1105	14.5718	17.4655	18.4059	31.5539	43.6018	27.4388	36.0446	35.1896	21.5809	14.8573	16.4616	19.7502	17.3768	16.6261	17.8288
CG44002	0.999829	1.25875	1.083	0.376698	1.1373	0.841816	0.732981	1.64602	0.87804	0.739934	0.980506	1.12152	0.616576	0.817235	0.465411	1.38879	1.10214	1.25303	0.88865	0.493637	1.00507	1.00021	0.612112	1.64708	1.25749	0.84855	1.03166	1.29207	0.797713	0.823888	0.595773	0.865679	0.9426	0.907428
CG31698	0.203352	0	0	0	0	0	0	0	0	0	0	0.139396	0.153271	0	0.130156	0.0887737	0	0	0	0	0	0	0	0.0722537	0	0	0.0607391	0	0.0713876	0.194026	0.0888599	0	0.218156	0.0966738
CG15404	0	0	0	0	0	0	0.166148	0.279832	0	0	0.222255	0.16948	0	0.130762	0.31649	0	0.222069	0	0	0	0	0	0.128077	0.0878469	0.195456	0	0.0738473	0	0.173588	0	0	0.117736	0	0.117537
CG34393	0.116406	0.179117	0.106691	0.281418	0.194202	0.239578	0.391132	0.395256	0.843369	0.315874	0.802264	0.691559	0.380197	0.184698	0.298022	0.101634	0.470499	0.213965	0.310385	0.36878	0.286041	0.170793	0.321609	0.165442	0.368102	0.0905604	0.104307	0.220631	0.204324	0.388736	0.237377	0.0923884	0.152631	0.498055
CR45336	0	0	0	0	0	0	0	0	0	0	0	0	0	0	0	0	0	0	0	0	0	0	0	0	0	0	0	0	0	0	0	0	0	0
CR45337	0	0	0	0	0	0	0	0	0	0	0	0	0	0	0	0	0	0	0	0	0	0.412059	0	0	0	0	0	0	0	0	0	0	0	0
CR45338	0	0	0	0	0	0	0	0	0	0	0	0.214369	0	0	0	0	0	0	0	0	0	0	0	0	0	0	0	0	0	0	0	0	0	0
CR45706	0	0.115089	0	0.0774946	0	0	0.0502631	0.0846551	0.120421	0.121776	0.100855	0.102542	0	0	0.0478724	0	0.0335902	0	0.0664777	0.101551	0.206765	0	0.0387459	0.132878	0.0591294	0	0	0	0	0	0.0653669	0	0	0.0355575
CR44484	0	0	0	0	0	0	0	0	0	0	0	0	0	0	0	0	0	0	0	0	0	0	0	0.76134	0	0	0	0	0	0	0	0.145768	0	0
CG3347	0.0527863	0	0.048381	0.0546917	0.198145	0	0	0	0	0	0.0474522	0.0361845	0	0	0	0.0691317	0	0	0	0	0	0.116174	0.0546897	0.356357	0.083461	0	0	0	0	0	0	0	0	0
CG3332	10.1139	3.95239	1.91282	1.87124	9.79245	6.00927	2.1307	2.3167	1.26003	4.54142	2.27297	4.78705	10.0733	4.37269	7.65503	6.4301	15.5189	0.774594	2.31865	5.17673	6.17614	1.23661	7.81734	1.55437	2.03062	4.21516	5.40645	3.37421	5.72027	3.31241	16.4679	5.61899	7.69268	9.74984
CR44485	0.300539	0	0.137729	0	0.188023	0	0	0	0	0	0	0	0	0.0794759	0	0	0	0	0	0	0	0	0	0.0533927	0	0	0	0	0	0	0	0	0	0
CG9664	13.5453	10.3361	14.7152	17.9348	18.4262	16.9775	8.78022	10.1929	8.8243	9.16397	9.27346	11.3092	7.81702	12.7078	18.2134	12.5999	9.23253	9.7691	17.091	8.1682	15.3726	18.3577	8.04934	8.30116	7.81972	11.7726	10.9249	13.7311	6.62092	9.52582	8.77363	13.7619	13.3567	11.5454
CG9663	11.412	8.37301	9.69768	8.22197	10.1184	9.97437	6.88183	7.82689	6.6011	7.99815	7.32048	8.10779	10.3104	11.272	12.7946	9.20504	8.50228	10.4187	10.5797	9.90213	9.1579	8.6492	7.12545	6.65961	7.03525	9.14281	8.04757	8.4105	8.87475	10.0233	8.1902	11.3548	11.932	9.73678
CG3277	3.29641	2.04941	0.36622	0.379489	4.87453	5.70509	1.16356	4.78622	1.2062	0.975818	2.15514	1.94011	2.13323	1.07424	1.8115	3.83748	3.02064	3.85581	0.384729	2.57689	1.59549	0.403047	1.70764	2.62646	3.48783	0.984359	2.25762	1.44702	2.01052	1.11195	0.829351	1.0148	2.16708	1.80456
CG15406	9.56028	39.9136	9.40672	3.93302	16.9758	10.6339	1.60616	6.84246	1.47131	0.457806	0.695121	0.770998	16.8488	13.8305	1.21481	48.8858	90.8897	2.51962	56.4189	7.63549	10.7529	4.25452	0.473401	3.79652	0.861382	0.164065	1.21781	3.19768	49.8737	7.78038	10.3826	1.67377	10.1808	9.99223
CG3326	0	0.150628	0.0897217	0.101425	0.306213	0.0755522	0.0328922	0.332389	0.0788032	0.07969	0.197999	0.100655	0.184457	0.181208	0.187966	0.213673	0.241795	0.13495	0.130509	0.0664552	0.225511	0.0538605	0.228198	0.295647	0.0386943	0.0380783	0.102337	0.139154	0.257738	0.163453	0.10694	0.279698	0.157526	0.18615
CG8837	13.0313	16.2738	7.61629	8.15316	23.2369	3.98412	3.29981	3.13509	2.33117	2.30615	2.77299	2.07138	10.1066	5.82665	3.4652	16.7366	30.7035	1.04142	13.5965	3.24799	4.00266	3.25589	3.52204	1.09603	2.9363	2.2039	3.3658	3.57956	9.28194	9.16004	4.31889	5.1563	6.48343	7.06297
CG33281	2.46804	3.46256	1.53022	2.48192	2.36149	1.56868	1.56099	0.985908	0.876525	1.47731	1.2072	0.84591	1.20367	1.57406	1.62613	1.64783	3.29258	1.20084	2.64522	0.985572	1.13712	1.99696	0.714465	0.980094	0.946869	0.451779	0.737176	1.85737	1.98766	2.32022	2.18866	1.65924	1.24598	1.72545
CG33282	0	0.337415	0	0	0.274373	0	0	0.0827299	0	0	0.0985616	0	0.0550924	0.0386585	0	0.0319092	0.0656526	0	0	0	0.0673542	0	0	0.155827	0	0	0	0	0.0256599	0	0	0	0.0522765	0
CG3285	1.13508	12.7719	1.49551	0.514524	5.94733	1.75211	0	2.24827	0	0.057752	0.031887	0.0972611	1.60413	4.31489	0.454069	3.74738	9.87667	0.391198	5.99013	0.770571	2.15727	1.01486	0.0735008	1.28555	0.0560841	0	0.0423796	0.691519	3.28742	1.45532	1.36401	0.608098	3.09502	3.30517
CG15408	6.28443	30.8304	4.40468	2.52791	15.0791	9.58649	0.59622	5.27193	1.19036	0.120375	0.465244	0.405452	5.51688	13.5297	1.5143	18.5911	34.3992	0.815392	25.3653	2.20844	4.76902	1.95261	0.0766005	2.49564	0.584494	0	0.618335	2.16204	10.927	5.53768	4.58767	1.30269	10.8399	9.70099
E23	6.31459	6.36237	7.82665	5.28524	5.67976	8.08216	7.27887	4.67992	8.61084	7.59183	7.06028	6.33114	5.62326	7.65401	7.1484	7.29872	6.64058	8.36434	6.31147	7.32259	5.9844	6.55301	5.76233	4.32762	6.42214	9.40555	4.91996	6.00551	5.53795	5.68193	7.43346	7.57645	7.19214	5.66206
CG8838	0	0.365967	0.217988	0	0	0.183562	0.159829	0.134596	0.0957301	0.290422	0.160353	0.32607	0	0.314473	0.228341	0.363397	0.053406	0	0	0.322919	0.328741	0.261719	0.123206	0.211266	0.235029	0.277545	0.81695	0.33809	0.292227	0.170197	0.259822	0.396406	0.1701	0.282669
CG34394	9.55294	9.37462	10.6915	9.54427	10.3064	13.9434	10.5576	11.1985	11.1822	9.668	11.7569	13.2751	10.3718	12.3819	15.1299	8.02862	12.0243	11.4672	9.76138	10.3895	9.01239	8.15231	8.43299	12.261	9.98602	11.5523	9.2637	10.9931	11.5893	10.9517	9.20071	11.017	12.1656	11.5854
CG15412	137.697	150.898	123.736	89.5482	82.2374	112.231	99.3677	69.3284	89.9896	119.973	72.1885	44.004	137.257	144.649	108.834	119.181	116.087	104.877	149.443	133.647	91.3819	103.6	62.8274	59.1766	85.0328	103.693	69.8163	75.1563	130.675	176.735	185.623	183.095	165.464	156.024
CG9662	5.4708	7.36583	7.64671	8.0773	6.50302	8.02246	6.80144	9.59765	7.81717	6.90307	8.91384	8.62543	8.55619	9.33137	6.65302	8.77695	8.16929	10.5587	7.05057	6.68511	7.68785	6.62217	9.70658	8.01837	8.10933	6.38419	7.43501	8.99894	8.88252	7.63411	6.27534	7.0341	8.60796	6.69712
Ptpa	62.0485	50.7415	51.3126	38.6418	32.7387	40.7728	49.6238	34.2211	36.643	53.3516	43.1219	25.5657	44.5134	45.7765	49.2838	52.5429	42.6754	33.8947	42.672	43.6452	36.8928	36.7445	29.0448	22.1056	35.2957	39.8711	33.9651	32.6566	42.0775	50.683	58.728	60.124	56.7039	48.6498
CR45301	0	0	0	0	0	0	0	0	0	0	0	0	0	0	0	0	0	0	0	0	0	0	0	0	0	0	0	0	0	0	0	0	0	0
Sfp23F	0	0	0	0	0	0	0	0	0	0	0	0	0	0	0	0	0	0	0	0	0	0	0	0	0	0	0	0	0	0	0	0	0	0
CG42460	0	0	0	0	0.261804	0.322975	0	0	0	0.170332	0.188093	0	0	0	0	0	0	0	0	0	0.192806	0	0	0	0	0	0	0	0	0	0	0	0	0
CR44791	0	0	0	0	0	0	0	0	0	0	0	0	0	0	0	0	0	0	0	0	0	0	0	0	0	0	0	0	0	0	0	0	0	0
CR44792	0	0	0	0.226624	0.273682	0	0	0	0	0	0.0983132	0	0	0	0	0	0	0	0	0	0	0	0	0	0.0864586	0	0	0	0	0	0	0	0	0
CG34175	0	0	0	0	0	0	0	0	0	0	0	0	0	0	0	0	0	0	0	0	0	0	0	0	0	0	0	0	0	0	0	0	0	0
pgant2	3.36604	2.14149	0.919604	1.24076	4.57619	3.49717	1.08751	3.1504	1.98015	1.18565	2.54583	4.10449	1.4149	1.04419	1.38795	1.48358	2.81987	1.51703	1.78354	1.8896	2.05787	1.1397	1.27425	1.2765	1.72712	1.28416	2.22347	1.34082	1.65887	1.00364	0.876867	0.601096	0.752307	1.63099
CG8840	0	0	0	0	0	0	0	0	0	0	0	0	0	0	0	0	0	0	0	0	0	0	0	0	0	0	0	0	0	0	0	0	0	0
CG31952	0	0	0	0	0	0	0	0	0	0	0	0	0	0	0	0	0	0	0	0	0	0	0	0	0	0	0	0	0	0	0	0	0	0
CG2772	15.739	0.133066	1.03039	0.0895995	2.81332	0	0	0	0	0.0703988	0	0	0	0.274424	0.166051	0.0755041	0.0776742	2.62275	0.538032	3.99208	2.23125	0.0951616	0	0	0	0.0672773	0.05166	0.0702458	0.364301	1.19642	0.0755774	0.0411812	0	0
Snx1	12.1527	13.8712	13.8578	18.0299	16.2054	14.4434	14.2631	18.7918	15.2946	16.0705	17.2846	20.2984	13.0731	13.8507	14.242	14.8448	13.3241	13.8432	15.1625	13.6339	15.0364	18.7097	19.3002	21.3063	17.3429	25.9664	22.1542	21.1336	14.1808	13.2285	13.0392	12.5525	13.5271	13.9146
CG12795	5.28887	7.97206	6.23248	9.17024	5.67226	6.9976	12.3309	13.6825	6.77737	10.8955	12.5653	14.2799	5.85747	5.65154	8.0138	7.53914	7.85277	8.03507	6.5235	4.98265	7.95684	8.90809	11.1269	10.7383	7.33834	12.6796	14.8623	9.33752	7.69195	6.53961	5.75418	6.73336	5.48089	5.5931
Cog3	9.57418	8.0248	8.38278	7.33902	8.27857	8.05016	9.62482	7.75285	6.57939	8.68114	9.9537	9.47102	8.71233	8.13071	8.22043	8.24031	9.40352	9.22835	7.95608	8.2434	8.8941	9.29357	9.4557	8.57372	7.96891	11.7782	11.3342	9.53167	8.3753	10.4719	9.09865	11.2684	8.36445	9.43618
Sec5	8.98387	7.59073	7.31514	5.44361	6.12231	5.57175	5.92948	7.21763	3.77747	5.7463	5.94888	5.85595	7.92005	7.21206	6.82828	7.65125	8.64566	6.96651	7.2363	7.62358	5.91316	6.84075	7.4795	5.47215	6.07179	7.42601	8.38557	7.39531	7.57481	8.53359	7.6762	7.86877	5.77986	8.29401
CG3246	42.9596	44.5401	60.0091	43.0028	40.5301	35.3428	38.3382	51.3965	18.925	46.0059	32.8017	33.4378	68.7416	68.8106	74.2546	56.095	85.0821	43.2823	74.5955	52.9212	36.1286	78.0305	38.3599	29.984	27.333	46.1106	44.0298	87.3021	76.9916	87.6778	76.461	80.955	52.4947	98.2197
msl-2	2.83021	3.33569	2.48363	2.714	1.959	3.76452	3.48015	2.14691	3.29632	3.25989	2.85548	2.66246	3.13171	4.44283	3.06409	3.52258	3.40748	3.23754	3.63944	2.57541	2.9409	2.08732	2.90107	2.96334	2.773	2.43606	2.70693	2.72697	2.57902	3.90698	4.38119	3.45543	4.68357	3.93626
mir-4971	0	0	0	0	0	0	0	0	0	0	0	0	0	0	0	0	0	0	0	0	0	0	0	0	0	0	0	0	0	0	0	0	0	0
Pdsw	285.663	295.049	268.145	309.782	232.861	130.445	291.536	202.476	161.805	359.416	219.095	131.549	287.986	200.174	184.544	298.761	287.422	252.451	316.327	320.374	218.444	301.925	196.957	93.9234	210.277	200.038	271.848	153.528	242.121	383.561	373.523	370.547	246.411	262.217
CG3238	2.17145	2.11387	1.909	2.20392	1.82982	0.95767	2.94828	1.60504	2.81826	1.44303	1.89227	2.55174	1.10225	0.960955	1.02111	1.23814	1.015	1.34402	1.61489	1.62455	1.22507	1.80432	2.43341	3.41685	2.64505	1.93066	1.93253	3.05977	1.44681	1.18392	1.06506	1.47722	0.808204	1.11658
CG31776	0	0.0906531	0	0.122082	0	0.0909396	0.0791823	0.133362	0.379411	0.19184	0.105922	1.05001	0.0444049	0.0623182	0.113124	0	0	0	0.052363	0	0.054288	0.0648301	0.0915579	0.041866	0.0698625	0.137501	0.087985	0.215351	0.020682	0.140531	0.102976	0.140276	0.0842706	0.0280078
pgant4	4.50454	8.1915	4.79586	4.24285	21.1217	85.6856	45.4373	61.0776	27.874	21.113	76.9992	36.087	47.018	25.4845	50.3528	33.8271	78.6102	98.4791	8.24993	66.0401	3.43806	3.7552	37.3829	78.3123	50.7185	14.0176	38.2979	35.4075	20.4775	20.4261	14.4944	3.70514	33.6645	143.283
CR45372	0	0.256546	0	0	0	0	0	0.566116	0.134215	0	0	0	0	0	0	0	0	0	0.148186	0	0	0	0.0863687	0.177719	0.131806	0	0.049799	0	0.0585296	0	0	0	0	0.0792614
CR43928	38.88	30.8454	30.5933	14.104	21.6991	19.861	94.3611	67.9607	106.13	37.723	72.5006	75.929	10.0493	20.3659	4.89348	7.04159	24.328	16.9665	20.0544	21.394	8.84934	20.9303	32.2642	169.286	82.0753	37.356	36.0922	29.9538	37.7392	11.2536	20.9823	17.8932	10.9027	14.6716
Thor	2844.72	2746.1	2820.26	1506.57	1696.68	1746.55	7133.36	3619.91	3866.95	4575.31	4181.21	3167.83	1919.11	1767.89	638.964	1207.48	2124.26	2125.41	2421.46	3140.55	1508.94	2316.16	2961.98	4747.53	3615.74	6897.57	3686.67	3212.55	2846.76	1791.13	2479.91	1601.34	1515.71	1943.91
CG15414	0.247591	0.63496	0.907713	0.513056	0.309795	0.127393	0.554615	1.12093	0.132875	0.335926	0.185477	0.961754	0.684254	0.872988	1.05647	1.15292	1.22312	0.227548	0.733531	0.672326	0.304199	0.544905	0.0855063	0.410537	0.195734	0.513649	0.640923	0.268157	1.1589	0.826826	0.432764	0.943232	1.03295	0.941639
tim	23.4747	41.3926	10.4833	30.3735	50.9216	26.3241	14.9702	44.4307	11.3776	28.2992	32.6888	22.572	45.9831	72.5823	73.5913	84.8599	44.549	27.2518	49.6319	11.6662	55.8379	16.9329	21.6059	40.527	20.8445	38.4913	49.5847	20.3458	48.6633	55.5666	37.2032	67.2153	111.184	48.1726
CR45299	1.05428	0.811129	1.44945	0.819254	0.659579	0.813692	0	1.49159	0	0	0.829279	0.722701	1.19195	2.091	0.506095	0.805434	1.77554	0	0.937048	0.715718	0.971496	0	0.682687	0.65555	0.208367	0.20505	1.10216	0.321147	0.277582	0.377224	0.691043	0.502054	0.754021	0.626508
CG31954	0	0	0	0	0	0	0	0	0	0	0	0.0811007	0	0.0625731	0.0757245	0	0.106266	0	0	0	0	0	0	0.0840744	0.0467655	0	0.035338	0	0	0	0	0.0563399	0	0
CR45300	0.338326	0.520593	0.930273	0.701077	0.423326	0	0.909439	1.14878	0.54471	0.27542	0.608277	0.927678	1.27502	0.894685	0.216546	0.590786	1.21553	0	1.80423	0.459357	1.24704	0.372299	0.525788	0.961693	0.133733	0.526415	0.909488	0.274821	0.593853	0.64562	0	0.161112	0.604925	0.16084
CG33123	25.7062	22.9908	24.5044	23.1906	23.8843	20.5664	22.0186	33.8889	23.8428	21.8604	26.5194	27.1982	14.9638	16.4269	17.5075	18.1171	18.6643	24.3281	16.3908	19.328	19.541	26.5074	33.1391	60.9788	29.8555	24.7123	27.2865	27.3676	14.951	16.403	13.8677	17.6198	12.6739	16.5554
CG17593	32.7796	28.378	31.3754	27.8115	25.5258	24.178	28.4798	29.2376	22.0661	23.4456	29.9498	25.977	30.4192	27.2244	25.5082	32.3146	29.9247	27.8622	27.6189	28.4701	22.465	30.372	30.1008	23.2267	27.2622	27.7127	30.448	28.1659	29.5334	31.457	29.7793	30.4677	27.4641	29.5154
CG3213	0	0	0	0	0.0608565	0	0	0	0	0.0395938	0.0218611	0	0	0	0.0311301	0	0	0	0	0	0	0	0.0503908	0	0	0	0.0290547	0	0	0	0	0	0	0
CG8851	0	0	0	0	0	0	0	0	0.0731413	0	0.183773	0.217988	0.0684816	0	0	0	0.0408041	0	0	0	0	0	0.047067	0.0484245	0.0179571	0	0.0542764	0	0.015948	0	0	0.0216335	0.0649814	0.0431939
Sr-CIV	0.915671	2.1775	0.686662	1.98369	1.14572	0.642465	0.111881	1.22482	0.737122	0.609886	0.523818	1.25537	2.63516	5.85549	0.532796	6.97723	19.8136	0.229512	1.92364	0.791152	0.767062	0.54961	0.646833	1.86337	1.31616	1.35997	1.094	1.01427	7.71479	2.77988	2.83725	1.30814	4.01862	2.80973
CG8852	5.40419	1.41068	0.796047	1.74977	4.2262	3.79853	2.30223	2.89448	3.84545	0.707041	3.31825	3.14223	7.85556	5.00188	2.22361	3.07539	5.74248	3.59199	1.20081	1.5068	2.13421	2.44245	3.14947	1.80017	2.44132	1.57661	2.14742	1.90094	5.31882	1.12795	2.55126	0.758263	3.36468	5.23006
Spindly	3.36703	4.41081	3.54477	3.25285	3.58671	4.77592	2.32384	2.62644	3.33316	2.74098	2.59732	2.58878	2.40063	4.09099	2.9705	2.72126	2.92208	4.39079	2.95218	3.58309	3.56384	2.95409	2.99346	2.5382	3.09347	2.69024	2.33756	2.79047	3.38629	3.51651	3.55897	3.14179	4.49077	3.65562
Che-13	0.15594	0	0.071463	0	0	0	0.104794	0	0.125533	0.253891	0.0700912	0.267239	0.0587677	0.0412375	0.149714	0.0340379	0.0700324	0	0	0.105863	0.0718475	0.257398	0.121172	0.0554075	0.0924595	0.303292	0.0232888	0.0633348	0.0273717	0.0743942	0.0340709	0.0742594	0.13941	0.074134
CR44308	0	0	0	0	0	0	0	0	0	0	0	0	0	0	0	0	0	0	0	0	0	0	0	0	0	0.210813	0	0	0	0	0	0	0	0
drm	0.944719	1.39046	1.27999	0.766033	6.83544	8.49596	2.48425	8.69357	14.5157	1.37094	10.8372	2.11173	9.62822	6.47375	4.60073	5.0566	12.599	20.1583	1.93489	11.6556	1.21118	0.994383	9.31973	7.42854	11.6736	1.82143	3.97501	6.90653	2.1485	2.56701	1.22051	0.782399	5.34653	9.64631
CR44309	0	0	0	0	0	0	0	0	0	0	0	0	0	0	0	0	0	0	0	0	0	0	0	0	0	0	0	0	0	0	0	0	0	0
CR44747	0	0	0	0	0.74245	1.83185	0	0.671597	1.91068	0	0.533412	0	3.5779	1.56914	0.759575	1.03615	1.06593	0	0	0	0	0	0.307384	0	0.469094	0	0.5317	0.240997	0	0.283079	0	0	0.636567	3.38507
CR43822	0	0	0	0	0	0	0	0	0	0	0	0	0	0	0	0	0	0	0	0	0	0	0	0.0899614	0	0	0	0	0	0	0	0	0	0
CG43815	0	0	0	0	0	0	0	0	0	0	0	0	0	0	0	0	0	0	0	0	0	0	0	0	0	0	0	0	0	0	0	0	0	0
sob	0.177262	0.204568	0.0812341	0.321405	0.166347	0.95767	0.387147	0.601891	0.570788	0.25253	0.89634	0.334156	0.601227	0.492197	0.425461	0.483648	0.696569	1.34402	0.472651	0.722023	0.163342	0.341357	0.573917	0.440883	0.683159	0.379237	0.410332	0.521961	0.404484	0.380547	0.154918	0.126619	0.412026	0.969108
CR43823	0	0	0	0	0	0	0	0	0	0	0	0	0	0	0	0	0	0	0	0	0	0	0	0	0	0	0	0	0	0	0	0	0	0
odd	1.3311	1.21376	0.54223	0.204319	2.77588	6.24015	0.82826	3.23637	2.30185	0.321069	1.61762	0.540717	4.19892	1.30372	0.978192	1.50654	2.70116	3.12633	0.481999	2.27584	0.454289	0.488256	1.35356	1.17364	2.00719	0.383541	0.809897	1.24144	1.92108	1.05838	0.301601	0.281724	1.25171	2.62498
CR44310	0.786531	0.134473	0	0	1.64023	0.269797	0	0.197827	0	0	0	0	0.131739	0.0924418	0	0.267059	0.0392478	0.240953	0.0776745	0.355967	0.32212	0.0961679	0.0905436	0	0	0	0	0.141977	0.337474	0.0833844	0	0	0.0312514	0.0830928
Dot	9.89769	7.26705	8.24279	8.69329	9.93264	9.84928	7.59676	10.4633	9.46419	8.30278	9.16852	9.02341	13.254	13.6051	11.448	12.3265	9.79262	10.6664	6.92156	6.95797	11.5279	8.01663	11.5299	14.6205	11.0221	9.69354	8.94402	6.91755	13.0166	9.01232	13.3484	10.1205	20.8591	8.59864
CG15418	0.455541	1.05143	2.08762	1.88794	4.27493	9.14122	2.14291	2.32018	3.11707	2.03962	3.27607	4.37177	2.91849	1.56605	3.64462	1.29264	6.23978	7.53595	2.22687	2.78327	1.04943	1.7545	6.72554	4.53207	9.0933	1.94919	1.76885	1.38763	1.67915	4.78114	1.49295	0.759258	1.54756	19.2742
for	33.5149	32.7872	36.5493	24.7416	27.1001	36.68	28.9302	28.4641	28.6736	29.2545	22.5849	26.4655	40.0248	37.6152	36.1903	33.4464	29.608	37.0635	36.3483	38.2718	28.8828	29.53	27.3791	35.6774	27.1423	32.2835	24.8742	34.7999	43.2048	38.869	42.7097	40.4367	43.7834	35.2479
mir-4972	0	0	0	0	0	0	0	1.22394	0	0	0	0	0.815059	0	0	0.944154	0	0	0	0	0	1.18996	0	0	0	0	0	0	0	0	0	0.514958	0.3867	0.514088
CG34340	1.08391	1.31045	1.20634	1.28347	0.871863	0.956068	0.962533	0.744846	1.62046	0.913889	1.14838	1.77792	1.19627	1.14654	1.26363	0.608377	1.1648	1.70771	1.47948	1.15631	1.10581	1.32055	1.26337	0.894046	0.9334	1.08418	0.751567	1.27352	1.08717	1.18194	1.62392	1.03233	1.10744	1.23302
Sfp24Ba	0	0	0	0	0	0	0	0	0	0	0	0	0	0	0	0	0	0	0	0	0	0	0	0.0787593	0	0	0	0	0	0	0	0	0	0.105378
CG42463	0	0	0	0	0	0	0	0	0	0	0	0	0	0	0	0	0	0	0	0	0	0	0	0	0	0	0	0	0	0	0	0	0	0
Sfp24Bb	0	0	0	0	0	0	0	0	0	0	0	0	0	0	0	0	0	0	0	0	0	0	0	0.0901587	0	0	0	0	0	0	0	0	0	0
Sfp24Bc	0	0	0	0	0	0	0	0	0	0.244025	0.134735	0.205483	0	0	0	0	0	0	0	0	0.276222	0	0	0	0.118489	0	0	0	0	0	0	0	0	0
CG16704	63.8044	67.6562	102.718	88.0292	94.726	111.756	39.7672	36.295	59.3469	57.3235	43.0921	33.9928	150.003	280.28	278.46	295.569	192.267	117.582	109.599	44.8858	123.986	74.9406	142.657	73.18	95.6549	140.427	130.639	125.542	165.96	161.501	182.021	290.773	494.986	151.82
CG3513	6.8385	5.89267	14.0399	11.9034	13.6906	9.28917	6.06615	7.12083	7.04646	6.45772	4.79503	5.43777	5.56668	5.7869	5.77762	7.5231	3.56255	9.05027	8.75243	3.34256	7.0577	11.7393	9.49402	2.527	3.13561	7.23541	6.20946	8.55455	3.74506	4.30642	7.5304	5.34071	11.249	2.86091
Acp24A4	0	1.09061	0.324812	0.36718	0.886846	0	0.476307	0	0.427927	0.865485	1.27431	1.45758	0	0.0937159	0	0.232062	0	0.488548	0.15749	0	0.326559	0.389973	0.275375	0.440714	0.280163	1.37851	0.793886	0.503769	0.124409	0	0.232288	0	0.0633643	0
CG43165	2.39245	4.35067	4.38557	5.859	3.80994	12.0861	4.53096	3.93869	4.20205	9.561	5.08346	5.21819	0.491793	1.26534	1.39208	1.04443	0.781414	3.59799	1.9331	1.47651	4.60958	3.59003	5.40811	10.819	6.70575	17.9357	7.73064	6.89016	1.14529	0.726322	1.4256	0	0.855537	1.75776
CG16713	90.0738	117.782	147.493	135.377	167.942	236.858	111.252	176.899	231.287	226.065	135.38	176.693	166.641	328.766	287.119	258.778	202.9	137.425	131.953	52.689	190.607	128.502	395.419	208.851	382.921	327.939	247.879	251.601	166.228	176.642	203.334	301.442	431.465	178.055
CG16712	1209.61	1221.06	2077.88	1375.36	1551.51	1946.85	1073.7	3112.48	1665.13	1479.65	1086.02	1244.91	1089.34	1658.09	1532.29	1311.99	1365.39	1176.45	1284.03	810.241	1528.24	1473.44	2500.33	3678.64	2093.2	2409.2	1744.17	2204.92	1094.81	1230.06	1378.96	1496.39	1775.3	1516.67
CG3604	0	0.846479	0.504205	1.51993	0	0.566103	3.82008	11.6226	8.85693	2.38843	4.698	2.89109	2.21138	1.64872	1.64314	5.52352	3.21172	0	0.162981	0	0.67589	0.40357	23.558	3.7138	16.0912	9.13009	20.9773	4.17066	7.08106	2.79939	2.80451	8.81957	1.90163	5.05615
CG10031	46.3231	53.382	82.1574	66.9024	58.714	83.2666	39.3502	64.6863	56.985	48.8109	29.5641	45.7754	32.043	76.0448	47.7466	30.3774	37.1944	58.0543	61.4907	52.0037	78.5341	66.8628	47.0585	59.9229	50.017	45.0865	43.8445	58.5598	47.2369	46.3033	43.9016	46.4104	68.9854	42.0421
CG42464	0	0	0	0	0	0	0	1.30961	0.310485	0	0.173359	0.264388	0	0.203988	0.740586	0.168374	0	0	0	1.04733	0.710811	0	0	0.274082	0.304911	0	0.115202	0	0	0.736006	0.168538	0.367336	0.965461	0.183358
CG42465	0	0	0	0	0.361042	0	0	0	0	0	0	0	0	0	0	0	0	0	0	0	0	0	0	0.102525	0	0	0	0.234386	0	0	0	0	0	0
Sfp24C1	0	0	0.292152	0.330259	0	0	0	0	0	0.259486	0	0.218503	0	0	0	0	0	0	0	0	0	0	0	0.113257	0	0	0.190416	0	0	0	0	0	0	0
CG42467	0	0	0	0	0	0.494752	0.430787	0	0	0	0	0	0	0	0	0	0	0	0	0	0	0	0	0.113885	0	0	0	0	0	0	0	0	0	0
CG43145	0	0	0	0	0	0	0	0	0.258021	0	0.144066	0	0	0	0	0.139923	0	0	0	0	0	0	0	0	0	0	0.191471	0	0	0	0	0	0	0
CR44311	0	0	0	0	0	0	0	0	0	0	0	0	0	0	0	0	0	0	0	0	0	0	0	0	0	0	0	0	0	0	0	0	0	0
CG2816	7.68537	8.54079	8.41365	7.29922	4.27388	6.5906	7.89048	10.3899	6.8742	7.64671	9.01978	7.17068	7.4017	5.41961	5.32894	4.93939	6.99885	8.82902	12.1436	6.95646	7.2786	7.51742	9.73194	8.64725	10.8857	7.97199	10.4574	8.23703	9.0682	5.70337	7.55621	7.42128	8.85557	5.58193
CG31778	66.7582	55.4328	98.8691	78.6575	73.7258	93.6225	31.5268	38.0099	70.3711	40.2622	34.8547	38.2282	59.8283	65.0179	53.8016	36.8291	37.4763	87.5417	62.9528	58.5844	80.271	63.1592	36.217	41.7632	38.8178	20.9802	30.0315	37.4468	63.6623	49.1804	62.6124	40.029	92.0335	46.5894
CG31777	68.8807	54.8539	121.834	85.7657	91.8563	68.5509	77.351	61.5485	70.7711	71.0756	54.5877	78.4881	89.0329	64.7117	62.07	47.8745	58.6122	107.451	74.3785	89.8301	57.9042	103.058	62.2874	46.9089	59.3501	62.2833	58.1122	74.9703	107.753	63.1274	107.459	47.4756	68.3853	68.077
cutlet	0.607858	0.990349	0.589901	1.03732	0.715835	0.938285	3.91669	0.687993	0.863524	1.01878	1.94466	5.02468	1.69787	1.47507	0.961205	1.43607	1.28465	0.887268	0.762727	0.436929	0.46128	0.826283	0.574208	1.79136	0.862155	3.31027	1.335	1.71364	1.5565	1.05761	0.81248	1.10678	1.02291	0.849929
CG31955	5.53014	9.00032	9.74734	10.9086	8.78247	11.6553	15.5085	15.2869	12.3281	17.7479	12.9063	18.8814	9.37842	15.4679	11.5036	9.09963	9.88654	5.57116	5.7659	4.90938	8.13382	8.54303	8.37395	19.9138	7.39857	15.8026	10.2602	8.72507	10.5656	9.18317	8.27198	9.62232	14.2233	7.98821
CG2818	13.7043	11.8039	10.7296	13.3297	14.4978	16.9601	14.2572	15.1492	12.5759	15.0267	16.1806	14.7349	14.5453	14.7497	15.8295	15.1572	12.345	11.8972	13.4588	12.5311	13.7695	12.0907	14.1778	16.3541	14.9244	17.1579	15.5498	12.3003	13.9279	13.438	13.3561	15.4685	18.1595	13.0871
lectin-24A	0.118796	0	0.326646	0.246169	0.743212	0	0.159665	0.403372	0.478159	0.290124	0.106792	0.325735	4.11881	1.63358	2.50917	0.518606	0.586863	0	0.316759	0	0.328403	0.5229	0.923099	1.43513	0.469575	0.0924199	0.46128	0.627236	1.58475	0.510066	2.18026	0.678856	6.75454	0.847137
Shaw	21.591	10.9318	45.2414	74.52	38.7425	11.6808	24.2135	33.8142	38.1151	21.0994	36.551	51.6985	7.95367	5.56888	15.5375	4.74815	3.19059	39.8778	10.3047	14.8931	44.8237	68.7307	75.6681	50.5189	31.0643	25.4028	43.2629	27.8207	5.96295	4.2394	4.79321	7.4055	2.52399	4.33458
CG10019	0.218076	0.16778	0.18322	0.357751	0.113694	0.0561035	0.183188	0	0.48277	0.236704	0.334901	0.622871	0.342435	0.240288	0.325686	0.285604	0.310136	0.300633	0.0969132	0.172719	0.351666	0.159983	0.367152	0.225999	0.158035	0.212071	0.265975	0.206666	0.146733	0.277433	0.182646	0.147119	0.207957	0.31102
CG43707	8.51437	9.29836	9.12025	11.9589	9.06682	10.3864	9.46963	7.45464	13.0312	9.52259	10.3527	10.0143	18.5209	29.599	36.1514	16.4608	19.5199	10.3106	9.17772	8.52086	10.3736	11.434	8.35887	13.3149	11.3907	8.09368	6.84485	6.86365	19.1878	24.884	23.5674	32.4429	31.891	23.659
CG43703	0	0	0	0	0	0	0	0	0	0	0	0	0	0	0.232889	0	0	0	0	0	0	0	0	0	0	0.283072	0	0	0	0.173586	0	0	0	0
mir-1004	0	0	0	0	0	0	0	0	0	1.3852	0	0	0	0	0	0	0	0	0	0	0	0	0	0	0	0	0	0	0	0	0	0	0	0
CR43704	0	0	0	0.226624	0.547364	0.337628	0	0	0.176078	0	0.0983132	0.299873	0	0.231367	0.139997	0	0.196461	1.20613	0	0	0.403106	0	0	0.155434	0	0.340329	0.195995	0.266509	0.537499	0.208697	0.573474	0.416639	0.469303	0.103984
bowl	4.7851	5.28304	4.13797	3.47328	5.9873	6.55165	3.88785	3.9166	4.39612	3.89539	5.72327	5.63369	8.00795	6.80596	5.38136	7.76566	7.41823	5.88849	4.63746	6.01972	4.78303	4.16488	5.34977	4.25532	5.19346	3.99608	6.04002	5.21551	6.67186	5.49425	4.93799	5.71603	6.00351	6.4261
CG31960	0	0	0	0	0	0	0	0	0	0.278679	0.0769344	0	0	0	0	0	0	0	0	0	0	0	0	0	0	0	0	0	0	0	0	0	0	0
CG31958	0	0	0	0	0	0	0	0	0.153705	0	0	0	0	0	0	0	0	0	0	0	0	0	0	0	0	0	0	0	0	0	0	0	0	0
CG3921	3.88219	3.30902	3.06026	5.41783	4.58847	4.01832	4.79944	7.44288	5.57615	5.13214	6.18618	7.18449	4.10336	5.78861	5.48394	3.53778	5.22538	4.4625	3.10847	3.62669	5.96572	3.42509	5.38245	9.49891	5.10919	6.71848	6.74104	5.37841	4.10844	2.83481	3.65497	3.7729	5.04715	4.03556
Reph	4.42481	6.99063	5.29171	6.93808	6.18784	7.59712	5.32691	6.18652	10.2098	5.0853	6.63656	9.92672	5.26121	9.14818	7.48158	5.99123	6.22718	5.28441	6.37236	4.49775	5.34198	6.66575	5.11144	6.70073	8.64226	4.51005	4.2971	7.53449	5.58207	6.28766	6.42097	6.91855	7.10769	7.12059
CG3407	2.44048	2.87166	3.11399	2.57815	2.75425	2.58527	3.11929	2.9247	3.00469	3.07746	2.27991	3.14904	2.45259	2.40433	2.78715	2.23524	2.0416	2.37485	3.1048	2.79376	3.26303	2.68554	3.07384	2.94146	3.10207	2.45704	2.78714	2.74037	2.58702	2.30573	3.01109	2.09646	2.7037	2.18392
CR44076	0	0	0	0	0	0	0	0	0	0	0.101776	0	0	0	0	0	0	0	0	0	0	0	0	0	0	0.176159	0	0	0	0	0	0	0	0
CR44077	0	0	0	0	0	0	0	0	0	0	0	0	0	0	0	0	0	0	0	0	0	0	0	0	0	0	0	0	0	0	0	0	0	0
slp1	1.29917	1.37436	2.08381	1.68258	1.42238	1.37871	2.34635	1.83806	2.48388	1.78472	2.66425	2.00378	1.77483	2.23313	2.54658	1.63057	2.44322	1.56713	2.38158	2.31516	1.72091	1.87639	2.3976	1.9907	2.63186	2.27411	1.91599	2.11063	1.28272	2.20802	2.1289	2.16535	1.53893	2.04589
slp2	0.641175	0.607136	0.406846	0.357711	0.431988	0.761319	0.729179	0.558233	1.38964	0.521959	1.08626	1.04809	0.520442	0.886905	0.599792	0.452155	1.17395	0.543942	0.789062	0.937511	0.636276	0.651285	1.09864	0.7886	0.818814	0.575556	0.545072	1.10175	0.657947	0.6353	0.689668	0.422766	0.652577	1.03168
CR44983	0	0	0	0	0	0	0	0	0	0	0	0	0	0	0.139208	0	0	0	0	0	0	0	0	0	0	0	0	0	0	0	0	0	0	0
CR45451	0	0	0	0	0	0	0	0	0	0	0	0	0	0	0.278416	0	0	0	0	0	0	0	0	0	0	0	0	0	0	0	0	0	0	0
CR45449	0	0	0	0.184721	0	0	0.119811	0	0	0	0	0.122213	0	0	0	0	0	0	0	0	0	0	0.0923573	0	0.140945	0.138701	0	0.0724106	0	0	0	0	0	0
CR45450	0	0	0	0.34499	0	0	0.111881	0	0.134022	0	0.0748312	0	0	0.0880525	0	0	0	0	0	0	0.153412	0	0.0862444	0.0591545	0.0658081	0	0	0	0	0	0	0	0	0
CR44078	0	0	0.187369	0	0	0.315557	0	0	0	0.16642	0	0	0	0	0	0	0.0918093	0	0	0	0	0	0.211802	0	0	0.159041	0.061061	0	0.071766	0	0	0	0	0
CG3964	2.00133	1.51606	1.43922	3.1582	2.88939	1.18817	2.17256	1.4288	2.08202	2.75713	3.40444	1.70959	3.27216	2.39379	3.62607	3.60226	2.86231	2.54674	1.34093	0.961496	3.12091	4.13353	4.97638	2.00201	3.78502	1.58093	4.15683	1.13797	2.51846	4.40664	2.93304	3.62156	2.59844	2.07851
Cep97	0.81621	1.79418	1.42494	1.40945	1.50759	1.31989	1.72387	1.67166	2.56564	1.20234	2.23614	3.67675	1.37687	1.1306	1.36823	1.93429	1.5186	1.07162	1.31272	1.4776	2.3638	0.98371	1.73155	2.54104	1.96651	1.6933	1.67172	1.2313	1.43267	1.37213	1.18888	1.18456	1.1675	1.57058
CG31957	16.3429	17.9049	17.3756	13.2753	14.0688	19.7778	15.9029	10.3585	17.4713	15.7521	12.7522	12.2784	11.3325	14.7978	14.5607	14.8397	11.3323	12.6167	13.0149	11.5384	13.0115	13.38	10.8366	11.0562	14.1086	11.7988	10.7782	12.4788	13.3563	12.5371	15.654	12.203	15.8962	12.5554
capu	3.09666	4.27987	2.09043	2.74734	5.12754	5.92489	2.49221	5.20488	2.59732	2.7926	3.05878	4.30902	4.37454	4.50147	6.20715	6.01452	6.52049	3.4254	3.42803	3.07151	2.92184	2.85668	4.32259	7.50432	3.04911	4.29889	4.58038	3.80324	4.94074	4.83889	4.70771	6.22529	3.31546	5.61534
fred	0.16923	0.236727	0.0282013	0.0956395	0.192498	0.142485	0.144741	0.121889	0.507773	0.162813	0.31809	0.812042	0.150744	0.138325	0.177244	0.0402969	0.193457	0.127253	0.232455	0.187994	0.382766	0.0677177	0.23909	0.158524	0.243248	0.0598438	0.0597376	0.0999749	0.0702106	0.124772	0.114286	0.0439573	0.154042	0.226729
CG31773	0	0	0.0425395	0	0.0580737	0	0	0.0525317	0.112088	0	0.041723	0.127263	0	0	0.0297066	0	0.041688	0	0	0	0	0	0	0.0164911	0.018346	0	0.013863	0.0377011	0.0325869	0	0.0202813	0	0.0165972	0.154453
CG43797	0.733254	0.451312	0	0.455833	0	0	0	0	0.118055	0	0.0659159	0.100528	1.21587	3.10248	0.0938638	2.36876	0	0	0	0.199113	0.405406	0.161377	0	0	0	0	0	0.059562	0.0514823	0	0	0	0.104884	0
CR45344	0	0	0	0	0	0	0	0	0	0	0	0	0	0.22792	0	0	0	0	0	0	0	0	0	0	0	0	0.0643585	0	0	0	0	0	0	0
CG34176	19.3327	3.55197	0	0.298963	17.691	13.362	7.3685	42.7829	1.16141	10.3355	8.68956	9.29644	11.9616	1.98392	2.77027	12.4706	8.29351	3.18227	1.28231	14.1038	5.58368	1.27009	18.2361	11.6878	4.67631	31.4274	42.662	3.04702	8.40754	3.8544	2.39567	6.32075	1.03184	2.33198
CG15422	31.6638	8.03395	0.771842	2.44305	30.9786	29.8976	3.3955	44.607	3.66074	8.36362	4.99637	13.8544	21.7076	5.70098	5.6056	22.6459	13.6907	6.03681	2.24544	8.91835	13.0367	1.29736	11.1678	18.0727	5.9917	12.9719	30.4857	3.07824	23	3.13365	4.12144	4.81227	2.7705	3.20276
CG15423	52.743	3.14563	0.187369	1.69448	7.16215	2.2089	1.51118	49.5155	0.164568	4.82617	4.77809	3.08297	8.78276	2.37866	1.17761	2.14186	13.955	0	0	9.15955	18.461	0	17.8972	16.7791	2.4242	13.3594	20.6386	0.581203	6.746	1.0728	1.69729	2.23907	0.146208	0.194372
CG43773	18.827	0.603535	0	2.43832	5.88926	3.63265	0.527166	9.32268	0.947242	9.57901	2.46816	3.22643	2.66068	0.207446	0.502092	0.342456	1.58534	0	0	2.66271	4.69858	0.431614	5.48602	13.3789	1.55039	7.01828	17.9246	0.47791	0.275387	0	0.342788	0.186781	0	0
CG43774	68.949	6.91033	0	2.73708	11.569	13.8643	1.42022	14.6509	0.212661	6.45161	2.731	7.06242	19.1148	3.9121	3.38167	18.106	27.2871	2.18508	0	5.38014	20.6914	1.1628	4.24232	8.44775	2.81938	6.98762	24.4606	1.6094	19.1042	1.89043	2.88592	5.66101	2.73957	1.63264
ed	5.65481	10.9735	8.64915	9.47878	8.22472	11.3696	7.60022	7.70481	10.5251	7.46218	9.13068	9.36984	10.2482	14.811	12.345	9.7408	10.1421	10.3279	14.4378	8.26457	9.82413	11.7517	7.74321	8.80476	8.10802	7.94391	8.46128	13.6631	10.2861	9.91461	10.3326	10.6942	13.4531	11.6179
CR44984	0	0	0	0	0.1516	0	0	0	0	0	0	0	0	0	0	0.105785	0	0	0.107687	0	0	0	0	0	0	0	0	0	0.0425336	0	0	0	0	0
snoRNA:Me28S-C437	0	0	0	0	0	0	0	0	0	0	0	0.683763	0	0.527556	0	0	0.447966	0	0	0	0	0	0	0	0	0	0	0	0	0	0	0	0	0
Sr-CIII	0	0	0.0907972	0	0	0	0.133146	0	0.0797478	0	0.0445271	0.0679079	0.0746672	0.0523942	0.0634063	0	0.355918	0	0.264146	0.269007	0	0	0	0	0	0.0770694	0	0.040235	0.139108	0.0945214	0.0432888	0	0.0708508	0
Sr-CI	46.8715	41.4786	61.5501	50.9589	45.695	64.8884	39.2316	27.7148	54.4406	43.7175	38.3326	32.3461	31.7636	35.2116	30.7064	26.5866	20.5072	43.1737	55.437	41.7364	45.0794	44.5815	36.884	26.9415	34.8113	28.7793	27.7646	47.8481	35.4729	30.8341	31.3195	26.0238	36.9235	26.6793
CG2955	0	0	0	0	0	0	0	0	0	0	0.027017	0	0	0	0	0	0	0	0	0	0	0	0	0.0213571	0	0	0	0	0	0	0	0	0	0
Or24a	0	0	0	0	0	0	0	0	0	0	0	0	0	0	0	0	0	0	0	0	0	0	0	0	0	0	0.0288726	0	0	0	0	0	0	0
CR44057	0	0.371697	0	0.25028	0	0	0	0	0	0	0	0	0	0	0	0	0	0	0	0	0	0	0	0	0	0	0	0	0	0	0	0	0.0863818	0
CG31961	15.8246	15.4296	19.4583	27.9216	23.3291	12.6971	18.2153	23.7628	21.8832	21.3641	17.2537	20.836	14.5254	19.1006	32.6419	16.5182	16.1134	17.2795	12.4635	14.3592	26.8539	15.4309	30.6801	33.3742	20.8091	24.0736	21.925	15.4951	18.7559	14.314	19.5125	20.2943	18.5734	17.3923
lectin-24Db	56.5593	48.4178	74.9294	69.9496	41.8634	53.9505	31.3839	27.0488	47.0537	21.8866	18.798	28.9416	62.7441	97.2718	80.7506	59.5975	52.0535	60.4	60.0938	53.944	49.9158	59.3897	30.5889	27.1724	28.4968	15.0287	20.6114	48.7739	79.9457	63.9888	59.6118	61.9762	72.3561	68.0728
CG3714	60.2115	89.0214	59.7666	50.7539	49.9324	83.5447	51.4833	65.879	74.9866	77.5206	49.3345	41.6122	64.374	100.114	63.1345	51.9102	72.1143	65.1046	83.2612	75.1577	49.5492	64.9023	42.6397	68.7582	65.3082	61.1064	42.2336	58.5858	76.8535	97.7257	95.7712	82.5502	74.725	91.2775
ft	0.130456	0.169041	0.352413	0.170735	0.257734	0.190772	0.267619	0.155425	0.143709	0.167684	0.12036	0.254159	0.165604	0.225147	0.514174	0.194831	0.342274	0.283962	0.274617	0.288993	0.246751	0.196444	0.13516	0.148816	0.119417	0.0961492	0.0963888	0.412721	0.178367	0.212914	0.297031	0.271383	0.223433	0.251339
CG3702	46.0095	39.231	39.2152	42.5085	48.7685	41.0136	39.8796	34.8272	34.9541	34.9101	41.1188	45.7685	39.3905	34.7185	38.4204	40.6614	43.0146	39.5916	38.4623	33.4891	30.7848	37.0853	36.89	30.6477	37.7631	42.1397	45.4728	36.8576	33.8296	36.2799	33.1455	35.6792	31.9278	38.7536
RpL40	993.434	903.452	1029.29	874.481	1046.4	766.729	954.205	1105.12	532.583	889.908	740.34	944.456	755.655	531.638	621.687	970.233	815.339	845.239	931.343	881.573	772.724	1135.89	861.443	692.484	764.475	846.351	1017.04	1075.67	792.174	749.269	635.584	741.473	623.353	757.917
CR44608	0.21507	0.330934	0.197121	0	0	0	0.14453	0	0	0.175081	0.193337	0.737142	0.324205	0.113748	0.275311	0	0.0965874	0	0	0.292008	0.396363	0	0.557062	0.382085	0.0850123	0.167318	0.192717	0	0.226503	0.205206	0.28194	0	0.153817	0.204488
CR45720	0	0	0	0	0	0	0	0	0	0	0	0	0	0	0	0	0	0	0	0	0	0	0	0	0	0	0	0	0	0	0	0	0	0
CR44058	0	0	0	0	0	0	0	0	0	0	0	0	0	0	0	0	0	0	0	0	0	0	0	0	0	0	0	0	0	0	0	0	0	0
CR44059	0	0	0	0	0	0	0	0	0	0	0	0	0	0	0	0	0	0	0	0	0	0	0	0	0	0	0	0	0	0	0	0	0	0
CR45294	0	0	0	0	0	0	0	0	0	0	0	0	0	0	0	0	0	0	0	0	0	0	0	0	0	0	0	0	0	0	0	0	0	0
CR45295	0	0	0	0	0	0	0	0	0	0	0	0	0	0	0	0	0	0	0	0	0	0	0	0	0	0	0	0	0	0	0	0	0	0
CR45296	0	0	0	0	0	0	0	0	0	0	0	0	0	0	0	0	0	0	0	0	0	0	0	0	0	0	0	0	0	0	0	0	0.0830861	0
CG15425	0.145544	0	0	0	0	0	0	0	0	0	0.0654184	0	0	0	0	0	0	0	0	0	0	0	0	0	0	0	0	0	0	0	0.0635991	0	0	0
CR44080	0	0	0	0	0	0	0	0	0	0	0	0	0	0	0	0	0	0	0	0	0	0	0	0.0375799	0	0	0	0	0	0	0	0	0	0
Art2	0	0	0	0.0751625	0.0907697	0	0	0	0.116797	0	0	0	0	0.0383677	0.0464317	0.0316691	0.0651587	0	0	0	0	0	0	0	0.086025	0	0.0433361	0.0589272	0.0764004	0.0692169	0.0316999	0	0.0259416	0.0344874
tutl	1.31003	2.52427	1.27642	1.72416	1.65393	2.44116	2.07796	1.52281	5.56744	2.3827	5.02359	7.97695	2.41957	2.6466	3.10466	0.999528	3.7314	1.39922	2.81124	2.37156	3.4366	1.09092	3.00189	1.74027	3.11162	0.899803	1.15272	2.24331	1.64898	2.39292	2.15571	1.46687	2.10176	3.43375
CG16857	4.32314	5.15215	5.63275	4.56701	3.65922	3.79455	5.26925	4.07755	6.9262	4.69243	7.33441	8.54177	9.2642	6.63522	7.86703	6.23539	8.39419	4.79117	7.60948	7.42341	6.28794	8.39514	7.44308	3.93052	5.2773	5.86924	5.63349	6.66185	8.57028	10.4739	11.1124	9.0825	6.85068	9.89327
Atet	20.8732	18.8092	23.5602	18.1747	16.5373	18.8346	28.0097	22.701	28.9703	29.44	24.0997	21.0543	20.3726	28.3226	26.6069	13.0326	20.1356	17.7032	15.1398	20.1917	17.6483	15.8308	21.603	23.6137	23.4091	27.551	20.391	19.124	19.4035	19.9896	23.979	23.568	17.1299	17.6015
mir-1005	0	0	0	0	0	0	0	0	0	0	0	0	0	0	0	0	0	0	0	0	0	0	0	0	0	0	0	0	0	0	0	0	0	0
CR44697	2.05051	0.450741	1.34242	1.82102	2.19915	0.904331	0.59056	0.663096	3.53717	0.238465	1.05332	1.40561	0	0.154928	0.18749	0	0.263109	0	0.781071	1.19317	1.07971	0.64469	0.910479	1.87347	0.926311	0.683673	0.17499	0.118973	0.102834	0.279496	0.256007	0.27899	0.62851	0.139259
CR44698	2.56416	0.493193	2.05639	1.32836	1.20314	1.48426	1.29236	0.362774	1.03208	0.521848	1.00846	1.31828	0.241582	0.169519	0.205148	0	0.143945	0.883718	1.42439	0.43518	1.1814	2.46893	0.830192	0.797193	0.633471	0.997418	0.765884	0	0.225039	0.30582	0.140059	0.763164	0.229235	0.152375
CR44699	1.62968	0.835881	1.74262	1.12567	1.01956	0	0.365057	0.922264	0.655954	0.221112	1.09875	0.558567	0.204721	0.143654	0.347693	0	0.121981	0.748878	0	0	1.00114	0.896664	0.562816	1.06159	1.18099	0.633923	0.730152	0.441262	0	0	0.118688	0.258688	0.291386	0
CR44700	0	0	0	0	0.321015	0	0	0	0	0	0	0	0	0	0	0	0	0	0	0	0	0	0	0	0	0	0	0	0	0	0	0	0	0
CG15429	0	0	0	0	0	0	0	0	0	0	0.0551513	0	0	0	0	0	0	0	0	0	0	0	0	0	0	0	0	0	0	0	0	0	0	0
Traf4	1.86567	2.48432	3.78167	2.71366	2.46908	2.60293	3.03795	2.59892	1.64629	1.72323	1.67715	3.36941	2.21747	3.56742	3.76608	3.16387	3.02922	2.07735	3.76287	2.72794	2.61182	2.84263	1.39395	1.86121	2.02801	1.73056	1.72535	2.73952	3.13621	4.41604	2.82203	4.27135	2.3479	4.17886
CR45363	0	0	0	0	0	0	0	0	0	0	0	0	0	0	0	0	0	0	0	0	0	0	0	0	0	0	0.0495847	0	0	0	0.0725413	0.0790538	0.0593642	0
CG17612	3.56653	4.7682	3.21529	3.3318	3.29206	2.07576	2.04314	2.4485	3.95362	2.04665	2.3389	2.28451	1.93901	3.24691	2.32018	2.57794	2.33694	3.06287	3.2219	1.27014	3.4481	2.57355	2.90764	2.67989	2.56532	2.31979	1.97339	2.35091	2.09358	2.67774	2.81038	2.06035	3.03166	2.41821
CG3338	6.29355	7.2781	6.3774	8.54579	7.18997	7.72348	6.25209	9.55665	6.70269	7.54185	7.29162	7.77087	6.89441	8.72463	11.1338	8.05465	6.89928	7.00555	7.95628	6.15663	9.00521	6.79647	9.13273	8.22247	8.18933	8.66718	9.15387	7.14443	6.60068	7.90709	7.41338	7.72523	8.13559	7.4706
Psf2	11.7307	17.0248	12.5844	11.8779	14.6779	13.1691	13.8852	13.7298	6.76055	11.3944	9.58667	9.3206	10.0474	10.9279	12.1156	13.4428	17.6606	9.55596	15.1655	6.87766	9.94972	10.7083	7.94134	7.67304	7.42957	10.8892	9.27719	12.9397	11.8396	12.0831	10.9511	13.4577	13.4904	13.7519
Tps1	206.688	207.371	267.924	187.381	180.873	214.204	165.66	224.249	73.5913	172.645	144.873	152.766	353.743	351.754	378.916	402.022	348.141	196.985	257.56	176.738	182.644	192.734	120.352	95.3891	88.137	176.55	177.324	243.373	399.671	390.373	357.946	418.16	429.058	466.112
CG3652	23.7554	22.589	22.7514	30.2822	28.5548	20.8064	26.0087	23.2619	19.7679	21.9459	23.3345	22.4135	20.3191	19.2695	28.8717	25.5765	27.5703	21.3417	21.2325	21.5628	32.2202	23.2036	34.8439	25.796	24.53	27.2024	31.0527	25.0962	22.2072	24.576	25.4848	24.2773	23.0031	21.7619
l(2)k05819	7.4771	7.87379	6.71158	8.43257	7.89295	6.33256	6.44764	6.84015	6.60505	6.49982	7.14783	7.63531	10.2073	10.5571	9.6279	9.27245	10.4106	6.38531	7.3906	6.97757	7.4184	7.32987	8.37513	7.43722	7.75936	7.73879	9.44057	7.22923	8.64888	9.33336	8.9634	8.00354	8.36056	9.41606
CG33003	0	0.0875763	0	0.0589691	0	0.175706	0.229485	0.257671	0.0916335	0.0926646	0.255817	0.429159	0.171591	0.0301016	0.145713	0.149077	0.0766808	0	0	0	0.104891	0.0626297	0.0884504	0.24267	0.0224971	0.309945	0.135998	0.161811	0.0999005	0.24437	0.0497406	0.162618	0.101763	0.0541145
Dim1	23.2942	23.504	18.5502	19.585	17.4402	22.6941	17.5787	14.4792	21.6724	19.7402	16.9068	16.6224	14.6791	19.5909	16.0094	18.1711	17.6643	15.2667	11.0308	16.3322	18.1222	16.8087	14.9355	17.5711	17.7361	15.0028	15.5693	14.2689	18.2989	17.9447	19.1065	16.2756	23.2148	16.7927
CG15431	1.0834	0.833533	0.297896	0.449004	1.51375	2.36914	0.315494	1.14448	0.595968	0.293987	0.592472	1.63386	1.674	0.840401	0.78589	1.20605	0.413571	0.69699	0.401221	0.710971	0.732109	0.317918	0.589297	0.320789	0.635231	0.168571	1.47778	0.696703	1.3375	0.792516	0.46553	0.911462	0.387424	0.78116
CG43055	171.546	142.021	5.80379	11.1335	242.977	428.89	2.06321	143.992	17.1462	10.7784	15.4384	197.042	281.448	18.8765	43.9684	155.139	19.7343	34.3888	14.1556	33.348	42.6133	6.9681	10.6361	12.6814	42.8544	4.03061	105.401	21.7437	421.352	12.6329	15.4283	35.1802	51.6696	31.928
CG34177	0	0	0	0	0	0	0	0	0	0	0	0	0	0	0	0	0	0	0	0	0	0	0	0	0	0	0	0	0	0	0	0	0	0
CG34178	0	0	0	0	0	0	0	0	0	0	0	0	0	0	0	0	0	0	0	0	0	0	0	0	0	0	0	0	0	0	0	0	0	0
CG43056	0	0	0	0	0	0	0	0	0	0	0	0	0	0	0	0	0	0	0	0	0	0	0	0	0	0	0	0	0	0	0	0	0	0
Sfp24F	0	0	0	0	0	0	0	0	0	0	0	0	0	0	0	0	0	0	0	0	0	0	0	0	0	0	0	0	0.070276	0	0.0874763	0	0	0
CG15432	18.2504	14.8837	12.5455	14.371	14.3864	10.9868	14.5948	8.88224	9.25577	14.5599	10.0898	7.7565	13.6182	15.4439	12.2652	16.1735	17.7038	11.0702	10.2192	17.3454	13.2857	12.0498	9.26516	8.0409	9.95529	8.66094	10.9569	10.155	14.2232	14.8014	19.4589	16.7735	16.5116	14.0555
morgue	11.9081	12.2156	12.4909	11.5155	9.10551	6.94406	15.7381	9.88388	6.87007	12.4407	11.5969	8.88852	9.27461	6.89291	9.31554	10.1949	9.29945	11.6738	11.9952	12.3057	9.69288	13.4679	10.3841	9.52002	9.85861	11.4258	12.7255	9.91478	7.91953	10.1943	11.39	12.7276	8.37474	9.81264
Elp3	21.3031	19.687	18.6714	14.9936	16.0864	12.5589	18.6149	13.8483	13.1994	15.3197	15.4934	14.3051	14.9331	10.4129	12.84	14.9395	13.1653	15.5829	17.223	21.3346	13.8499	20.7768	17.4704	14.7634	16.7431	16.9114	16.566	19.3981	12.6677	15.6446	14.6554	14.6402	11.2604	14.3202
MFS18	4.01153	4.34015	3.90654	4.35116	6.35265	4.64413	4.8019	6.66868	3.58252	4.79642	8.31108	5.84347	6.85029	5.83455	7.10096	5.80097	8.67006	5.18454	4.3454	5.6168	3.23446	4.2764	5.97451	4.81055	5.54984	5.7053	6.87092	5.88067	6.29317	8.88112	5.09447	5.43244	4.97598	7.50914
CG15439	1.52658	2.24222	1.55817	1.33005	1.56282	1.23176	1.49219	1.92417	1.00547	1.158	1.20078	1.35563	1.56902	0.990887	1.59887	1.68122	1.66721	1.14791	1.97356	1.93137	1.24685	1.7944	1.88716	1.51629	1.24799	1.75445	1.93788	1.35276	1.48593	1.93657	1.4706	1.55306	1.04218	1.84733
CG15440	17.2994	14.4005	15.1625	14.0061	12.6562	10.2144	16.0723	12.3044	10.3495	14.1598	14.4891	10.8218	17.1715	14.7491	16.0944	17.085	15.4109	11.9894	16.384	16.0437	12.2824	17.4761	13.271	12.5957	12.1441	15.5912	14.7673	16.6631	14.5022	17.2276	20.0345	20.3025	17.7136	15.6843
CG15434	126.272	193.525	119.192	148.291	69.5562	136.672	114.945	93.3812	135.061	167.501	92.3701	31.0369	241.917	299.464	230.065	255.965	229.658	142.866	246.595	157.1	181.72	151.131	56.6823	54.9654	66.0198	87.6687	75.958	84.6922	303.145	333.723	505.283	358.752	445.161	313.303
Gs1l	38.0484	37.7581	36.8104	31.7088	30.0135	24.9679	45.6413	36.3031	29.8894	38.5303	38.4997	26.7748	39.4841	27.9491	32.294	40.2012	45.1125	30.4072	44.028	39.0567	29.6406	45.5098	28.9463	19.201	30.8786	40.2538	43.5644	36.095	39.942	53.9728	46.0634	48.5794	36.4471	41.7252
RpL27A	954.907	960.812	1083.46	726.312	889.022	495.75	1215	1304.03	326.083	814.41	810.925	726.504	800.608	362.732	429.376	990.854	903.419	670.803	1152.7	1063.71	671.902	1426.94	973.526	485.944	616.324	1044.94	1315.59	1306.42	781.91	849.023	687.33	825.463	427.234	779.489
snoRNA:Me18S-C1831	9.64229	7.41845	13.2564	11.6554	14.0756	2.48063	12.9595	10.9135	5.17475	3.92473	6.50096	2.20323	2.42254	3.3998	6.17155	7.71715	3.60861	8.86172	5.71339	10.9097	4.44257	8.8421	9.98998	3.42603	8.89323	2.50047	10.0802	7.83241	3.38496	6.90006	4.21344	6.12227	1.72404	3.81996
mRpL27	31.9065	35.9142	32.316	27.2698	22.3691	18.5888	35.7082	25.574	24.0859	38.0008	25.39	15.8292	39.0205	38.6746	29.8777	40.3231	38.973	24.9878	39.1723	38.2637	22.9946	31.0119	19.7441	11.9102	22.4266	17.675	23.918	19.2112	41.927	54.3713	54.5758	58.7068	46.66	45.5641
CG15435	1.18796	1.27957	0.598851	1.53855	1.70939	1.65036	1.23741	2.42023	0.956318	1.06379	1.3349	1.87298	1.16401	1.8849	1.55873	1.81512	1.78726	1.80146	1.95335	1.12906	1.47782	1.96088	1.60004	1.54066	0.986108	1.3863	2.0935	1.47159	1.06345	2.23862	1.73902	1.83857	1.97538	1.41189
CG15443	8.22185	8.43414	7.59696	7.06423	7.36016	5.2622	7.14233	8.09525	7.21056	8.21677	7.36099	7.10228	8.91762	5.9747	5.69023	8.22903	7.56496	8.29347	7.42642	8.80342	7.82262	8.09121	8.76071	8.12272	8.79855	7.38441	8.4255	8.60615	7.62643	8.22745	9.69749	8.14889	7.19494	6.38734
CG15436	0.656031	2.27127	1.20256	1.10453	1.43649	2.02529	1.81856	1.76348	1.71636	1.60216	1.51121	1.79881	1.91605	1.73484	0.997245	1.96894	1.39946	0.904386	1.89502	1.22474	1.81355	1.26334	2.29394	2.65147	1.68555	1.02075	1.51861	1.19901	1.32424	1.01716	0.967509	0.702912	1.08501	0.66274
CG17840	4.28232	3.91446	4.23583	3.73402	3.87276	3.79594	4.18845	4.75089	3.27664	4.45254	4.44038	3.95274	5.20903	3.58792	3.98923	4.05356	4.68419	5.14363	4.3714	4.20239	3.94606	5.64547	4.81013	3.81144	4.08931	5.24467	5.10366	5.0628	4.36113	5.11752	4.42805	5.41111	4.19985	3.9507
ine	11.4686	15.6264	13.5339	9.46374	13.2911	18.0182	10.9232	10.2721	9.2793	11.8544	7.71261	12.3426	34.6206	14.6779	11.6738	12.1535	42.1217	8.77009	16.1848	17.4336	10.7294	15.7673	15.3894	10.0059	9.41263	12.0098	11.6451	18.7978	19.567	16.8455	17.3043	13.1463	9.38154	22.4608
dp	1.72224	1.28165	3.12306	1.72265	2.18719	1.35782	3.00765	2.06964	2.91679	3.16733	2.13114	2.1955	2.25739	2.3935	3.05742	1.30676	2.42528	2.6563	2.12068	2.22898	2.5401	1.59734	2.36688	1.70758	2.0563	3.51069	3.12835	4.04184	1.48124	1.56178	2.02259	1.92951	1.75255	1.90098
HP6	0	0	0	0	0.289555	0	0.155514	0	0	0.376774	0.104015	0.317266	0	0	0	0.101024	0	0	0	0	0.213243	0	0.479519	0.0822247	0	0	0.276484	0	0	0.110401	0.101123	0	0	0.110015
CR43716	0	0	0.163912	0	0	0	0	0.202413	0.28793	0	0	0	0	0.0945849	0	0	0	0.493079	0	0	0.164794	0	0	0.0635431	0.0706903	0	0	0.0726344	0.0627814	0	0	0	0.0639519	0.170038
CR44609	0.0921972	0	0.0845029	0	0	0	0	0	0	0	0	0	0	0	0	0	0	0	0	0	0	0	0	0	0	0	0	0	0	0	0	0	0	0
CR45452	0	0	0	0	0	0	0	0	0	0	0	0	0	0	0	0	0	0	0	0	0	0	0	0	0	0	0	0	0	0	0	0	0	0
BG642163	0	0	0.0698164	0	0	0	0	0	0	0	0	0.0522162	0	0	0	0	0	0	0	0	0	0	0	0.0270654	0.0301097	0	0.0455043	0	0	0	0	0	0	0
CG15635	0	0	0	0	0	0	0	0	0	0.0266686	0	0	0	0	0	0	0	0	0	0	0	0	0	0	0	0	0	0	0	0	0	0	0	0
CG43798	0	0	0	0	0	0	0.104092	0	0	0	0.069622	0	0	0.081923	0	0	0	0	0	0	0	0	0	0	0	0	0	0	0.0543769	0	0	0	0	0
CG3355	0	0	0	0	0	0	0	0	0	0	0	0	0	0	0	0	0.0367497	0	0	0	0	0	0	0	0	0	0.0244417	0	0	0	0	0	0	0
CG11929	0	0	0	0	0	0.058868	0	0	0	0	0.0342832	0	0	0	0	0	0	0	0	0	0	0	0	0.0135505	0	0	0	0	0	0	0	0	0	0.0181303
Bsg25A	0.0855825	0	0	0	0	0	0	0	0	0	0	0	0	0	0	0	0	0	0	0	0	0	0	0	0	0	0	0	0	0	0	0	0	0
Elba3	0.080019	0.123128	0	0	0	0	0	0	0	0	0	0	0	0	0	0	0	0	0	0	0	0	0	0.0284318	0	0	0	0.0324996	0.028091	0	0	0	0	0
CG3251	0	0	0	0	0	0	0	0	0.0552792	0	0	0	0	0	0	0	0	0	0	0	0.0632769	0	0	0	0	0	0	0	0	0	0	0.0327006	0	0.0326453
CG34351	0.287204	0.718137	0.559376	0.818322	0.943323	1.66248	0.796147	1.0971	2.60102	0.935214	1.5491	2.28868	2.00237	3.39875	2.82631	2.14712	2.35394	1.88068	1.05298	0.438691	0.926282	1.34319	2.13872	1.8241	2.55433	0.921676	1.30822	2.08508	1.68881	1.84972	1.85114	2.87213	2.06692	3.4817
Taf12L	9.006	6.32639	6.28052	9.53393	10.7787	0.302209	3.42078	0.443186	4.72819	5.10016	3.87198	1.74469	0	0	0.125311	0.0854691	0	10.2562	6.61245	1.59493	3.42777	6.24782	3.44832	7.58248	2.78599	8.68184	3.27477	0.477101	0.206191	0	0	0.0932326	0	0.0930751
CG15631	0	0	0	0	0.145141	0	0	0	0.0466894	0	0	0	0	0	0	0	0	0	0	0	0	0	0.0300451	0	0.0229256	0	0	0.0235561	0	0	0	0	0	0
CG15630	2.12188	2.06562	2.06387	3.14068	1.73386	2.94111	4.045	3.23483	5.64729	2.92592	4.34046	6.41181	3.13334	4.48896	4.29606	2.45756	3.13107	1.67152	2.96361	2.46939	3.71101	2.43025	4.37436	3.47732	4.31348	4.24481	2.57393	2.47987	3.1924	3.9665	4.14406	3.29943	3.25193	4.05556
CG42523	0	0	0	0	0	0	0	0	0	0	0	0	0	0	0	0	0	0	0	0	0	0.127966	0	0	0	0	0	0	0	0	0	0	0	0
CG3294	2.32767	1.03983	1.58285	1.86711	1.78506	1.50673	2.37156	2.46456	1.93423	1.7115	1.68746	2.31618	1.24507	1.15165	1.48982	1.90117	1.78721	2.07023	3.00314	2.44672	2.49084	1.81777	2.3338	1.60074	1.48399	1.75244	2.1306	2.01274	1.68699	2.04181	1.41086	1.46601	1.77214	1.57062
Clect27	4.76278	4.84983	8.79479	6.45865	8.23795	5.94631	18.1684	9.03729	16.1257	13.9124	12.1204	11.0909	21.2221	10.6316	6.9486	9.69272	10.7891	22.5942	8.21732	12.1724	6.38955	7.78447	10.9575	7.16729	12.4308	16.2379	23.3053	18.2061	14.0644	9.0887	8.41668	8.07162	7.53901	14.5177
CR45297	1.47712	1.51526	0.451281	0	0	0.760023	0.330881	0	0	0	0.885237	0	0	0	0	0	0	0	0.875243	0	0	0	0.255063	0.874731	0.389248	0.383051	0.294132	1.39983	0	0.234896	0.215154	0.23447	0.352144	0
CG15629	10.585	24.8663	21.4768	22.7713	12.6377	24.1965	12.3803	22.0403	21.9204	20.8515	23.9337	31.1284	16.6262	28.8034	20.1696	10.9702	17.4907	14.4808	37.7754	10.3124	13.9234	50.6815	23.7332	23.2262	28.2021	22.1899	22.9519	38.9542	23.4016	26.598	20.4081	27.2424	19.4171	25.5831
CG3225	1.74506	1.79012	1.37729	2.00895	2.06219	1.64613	1.36816	1.81053	1.2487	1.46006	1.45979	1.69465	1.38837	1.30751	1.52026	1.43897	1.34972	2.27205	1.8526	1.38211	2.05471	1.33354	2.03399	1.41232	2.03104	1.35761	1.70848	1.61439	1.37838	1.59566	1.37683	1.75435	1.85477	1.38267
mir-4910	0	0	0	0	0	0	0	0	0	0	0	0	0	0	0	0	0.787334	0	0	0	0	0	0	0	0	0	0	0	0	0	0	0	0	0
CG15628	5.65001	10.2334	6.39219	7.62234	13.0712	20.3497	17.4815	8.89285	26.5554	7.83349	17.4197	29.4713	4.63559	15.0501	15.162	8.74843	15.7531	13.3872	24.8733	13.2648	10.5212	13.6005	20.4424	22.2919	14.726	15.5446	11.5934	24.2502	13.7499	7.59498	8.31972	6.53022	8.48163	26.4545
CG2976	45.7866	36.8728	42.3577	38.5722	50.972	29.9877	48.0805	35.2588	22.3907	34.9046	42.8909	31.2103	19.9967	13.4433	21.856	24.5463	33.669	44.597	38.4893	45.4335	32.3335	40.5899	40.9648	28.3408	32.5434	40.5476	46.7027	36.6362	21.5416	22.17	19.484	18.5842	17.8116	25.0625
mir-4912	0	0	0	0	0	0	0	0	0	0	0	0	0	0	0	0	0	0	0	0	0	0	0	0	0	0	0	0	0	0	0	0	0	0
Ir25a	4.96765	4.41756	4.6122	4.91301	4.31871	3.38588	5.83124	5.76858	5.73882	4.93682	5.3646	4.20132	0.875273	0.81891	1.1562	0.718183	0.869206	6.13675	3.58381	5.21185	3.38859	5.04051	4.74573	10.132	7.44639	5.69664	5.58826	3.62907	1.14373	0.892564	1.40957	1.59756	1.13045	1.07346
tank	25.9389	21.9241	23.2958	21.8463	18.6115	20.8655	20.3424	26.0505	20.4189	22.3906	19.0484	17.9956	22.265	25.0086	20.6442	18.25	20.3215	21.4408	25.9306	24.0221	21.8822	20.7329	20.4666	24.7193	22.8167	22.8595	21.8868	23.2958	22.5725	26.8159	25.4517	23.9092	22.9561	22.1568
CG12194	1.04465	1.83707	0.683906	1.08236	0.933648	1.45894	1.23689	2.19583	2.16245	1.66033	2.07941	3.44409	2.81206	2.07847	2.13324	1.43328	4.15534	0.822929	1.19377	2.29639	2.42947	0.711626	2.1131	3.11082	2.04497	1.35451	1.04008	1.85877	1.93842	1.94602	1.97811	1.58716	1.47648	2.41219
mxt	73.3341	61.2891	83.5774	93.1034	66.5214	53.3287	80.8514	69.4454	74.6573	78.533	88.4105	66.8845	48.013	54.5927	94.0197	48.1198	48.8305	76.9516	68.0167	76.057	85.0943	77.3097	71.9396	75.6905	69.8332	102.192	82.4694	62.1047	48.444	60.0386	60.4118	73.5166	52.8727	51.4486
CG11927	8.34108	9.44633	9.17397	7.05201	7.5979	4.32608	10.2241	8.98755	6.55348	8.90873	6.56844	8.1878	5.58273	5.7879	3.88658	5.82609	5.45413	7.72718	7.47288	8.06339	5.96442	6.31491	8.08877	9.05705	7.51726	8.72137	7.87278	7.20907	5.57523	6.65334	6.32745	7.91235	6.51435	6.31285
mRpS2	41.1989	45.8595	39.0231	33.0849	31.6505	22.229	42.1605	26.0789	20.1613	40.0628	34.2215	17.3397	56.6307	34.572	39.7544	56.7989	53.7637	34.8715	46.5233	33.8343	31.7326	45.4737	30.7484	15.8398	30.1446	30.9799	41.3679	29.6513	50.2029	74.7954	71.7379	74.7792	47.5565	52.2689
Mon1	22.6251	19.3936	20.6242	19.9382	17.5395	18.1263	17.1049	14.8219	16.6791	19.8697	19.344	15.7621	14.458	15.7706	17.6292	15.0302	13.0048	19.6634	15.9016	17.4463	19.3188	19.2816	15.5105	16.9518	18.5911	19.0844	16.5641	16.4555	15.173	15.3986	16.8448	17.5666	18.4239	15.111
pog	0.567101	0.698093	0.398493	0.646328	0.54401	0.291791	0.597056	0.684654	1.88695	0.892538	1.29998	2.4102	0.655403	0.389914	0.725946	0.132037	0.679158	0.260596	0.705656	0.821304	0.592246	0.374428	0.66589	0.758977	0.769625	0.529425	0.400882	0.629561	0.311897	0.559129	0.479097	0.315066	0.39883	0.691974
Cf2	27.4319	25.417	30.525	30.9226	26.3385	36.135	26.7239	25.3728	31.7105	28.2472	28.9507	25.7342	28.7403	38.9019	37.4841	25.6834	25.9399	31.7913	28.9337	26.4321	33.0614	26.8226	21.2811	32.08	25.4175	28.8513	23.6918	23.8947	29.5021	30.5234	31.4968	39.56	38.1166	26.656
CG3008	87.228	62.4684	79.8078	79.6226	72.6127	52.8003	77.757	78.1833	78.5747	76.8783	66.3942	55.8685	43.3551	46.3233	53.114	45.1775	44.7538	78.663	63.1225	69.6294	72.9814	94.6366	86.7182	77.9191	89.3713	69.4121	79.3227	68.4046	47.4762	44.4433	59.8111	68.6625	46.021	43.4614
CG15625	0.189374	0.291396	1.30177	0.392419	0.236952	0.292317	1.20899	0.321509	0.457342	1.07914	1.19166	1.10342	0.214103	0.100158	0.121209	0.0413357	0.127571	0.783197	0.504948	0.771359	1.04702	0.729365	0.490506	0.706514	0.523987	2.06258	1.21612	0.999882	0.0664804	0.180689	0.0827517	0.180362	0	0.180057
CG3036	197.182	118.326	218.432	133.097	120.445	154.669	188.2	212.77	207.71	234.742	150.558	159.737	161.33	131.804	87.048	95.0688	121.776	205.945	127.13	172.747	129.851	150.311	164.017	230.943	142.335	190.977	168.652	193.037	155.859	116.02	138.743	76.2852	131.585	107.98
CG2837	0.268255	0.275182	0.655648	0.277938	0.559419	0.138026	0.360543	0.101207	0.503878	0.145585	0.482297	0.245182	3.03285	0.709387	0.915717	1.75661	0.803154	1.47924	0.0794753	0.607033	0.164794	0.196795	0.277928	0.127086	0.494832	0.13913	0.186958	0.290538	2.51125	0.725199	2.0709	1.27745	3.35747	1.10525
hoe1	9.04668	13.805	12.6666	12.0402	13.0081	10.2997	10.5635	11.0879	14.8671	9.39901	14.2544	20.6771	12.3188	10.4946	10.6049	9.2733	12.5365	10.3355	16.6367	12.1812	17.7089	14.3001	21.9693	14.8377	16.5067	12.2485	13.4211	19.8534	12.5807	13.1265	12.6349	10.2227	8.80264	16.6329
hoe2	1.08175	0.801439	0.257049	0.622667	1.00262	0.61844	0.484635	1.04298	2.12867	0.717541	1.45866	1.62038	1.20791	0.741647	0.461584	0.944481	1.11557	1.10465	0.676586	0.543976	0.738377	0.352704	1.26604	1.55168	1.02939	0.90391	0.658182	0.976339	0.928286	0.344047	0.437684	0.324345	0.386834	0.838063
Sgs1	0.0878791	0.0450741	0.0805451	0	0.0366526	0.0904331	0.0196853	0.0663096	0.0707434	0	0.0394995	0.140561	0.0441576	0.0774639	0.018749	0.0383637	0.0394664	0	0.104143	0.0795444	0	0	0.045524	0.052041	0	0	0.0437475	0.0118973	0.0102834	0.0978236	0.038401	0.0557979	0	0.0278519
CG14044	0.17558	0.405257	0.321855	0	0.109846	0.135512	0.0589962	0.298091	0	0.071467	0.315676	0.842512	0.330847	0.0928626	0.280951	0.114975	0.236559	0.4841	0	0.357588	0.323586	0.193211	0.22739	0.124772	0.242911	0	0.0786658	0.213935	0.215734	0.251292	0.383621	0.292643	0.25115	0.500826
mRpL24	69.2923	65.7232	74.5388	68.6422	56.7528	77.7699	63.3609	45.2004	58.0163	83.5362	58.6646	42.423	73.3571	88.6125	77.698	84.2255	71.9776	64.8982	78.3942	65.5332	64.7041	57.1877	45.0748	34.2995	61.47	50.9239	50.5176	48.6594	74.7864	93.1784	107.883	81.6746	103.466	78.1419
betaggt-I	15.8903	17.3652	14.802	15.1199	33.841	26.2302	17.6087	23.4908	15.1414	15.6285	22.0974	20.8072	28.989	18.9009	26.319	25.9073	30.4968	31.8307	20.9256	26.7704	16.4355	14.5597	18.4456	20.3949	22.7145	17.5089	19.8181	17.3332	28.0284	21.5666	18.3653	17.9756	22.1032	34.9038
jet	9.87456	9.43516	9.12346	6.76566	6.8752	5.03979	10.8635	10.5454	5.83361	7.64958	8.0177	4.69457	11.164	7.96017	6.52409	9.59489	11.7304	7.02595	10.1213	11.569	6.89775	12.7063	7.21919	7.15859	6.70468	8.73531	9.58561	10.0263	10.5393	13.7146	11.4485	15.0171	8.08743	9.46445
Jon25Biii	405.186	16.3618	14.4907	11.8869	13.3048	2.37565	0.376092	1.26686	0	0	0.0628871	0.191817	21.7237	0.813979	0.0895509	0.0610789	13.2581	11.5727	22.3838	64.3978	32.3604	1.07773	0.0724787	0.0497127	0	0	0.125371	0	9.0866	3.2039	0	0.199881	0.500325	0.0665144
Jon25Bii	3.75338	1.19492	0.118625	0.134099	4.69637	2.39739	0.0869766	33.2531	0.312569	0	0.407219	0.798488	2.14614	1.16369	0.662717	2.59906	2.90627	0.356848	0	2.46018	0	8.11812	0.0670468	0.229935	0.409276	0.805521	0.657191	8.25294	11.7224	4.44568	0.791787	1.29431	2.03645	3.63024
Jon25Bi	6.94779	2.6727	0.244922	0.276869	9.36207	7.21846	0.269366	91.3403	0.537791	0.652611	1.14105	2.65609	19.1341	3.17995	3.84831	14.3487	7.7406	0.368386	0.356262	4.53522	2.58551	6.46923	0.346073	0.142422	2.48224	8.6275	5.3477	11.3959	68.9031	9.94373	2.6857	3.43583	7.40579	8.44802
Marcal1	4.22325	4.79999	3.95877	3.67956	3.78307	4.51884	4.45063	3.04183	4.28832	4.57099	3.30036	2.8621	4.26832	5.60946	5.22188	3.89684	5.02183	4.1019	4.13753	4.3657	4.59919	3.69674	3.45568	3.42745	3.90782	3.65892	3.08192	3.5085	5.32384	5.72382	6.50104	5.50776	6.48713	5.01934
CG34124	0.0371214	0.0571199	0.0510352	0.0192307	0.0232239	0.0286502	0.0498922	0.0210076	0.029883	0.045329	0.0500555	0.0763392	0.0139896	0.0294497	0	0.0486162	0.0166712	0.0511745	0.0164968	0.0252005	0.0171032	0.040849	0.01923	0.0329743	0.0366832	0.0288794	0.0166316	0.0603073	0.0130316	0.035419	0.0405528	0.0088387	0.0265492	0.00882377
CR43824	0.0827664	0.127355	0	0.257262	0.517803	0	0.166861	0.187355	0.133255	0.134755	0.148806	0.226943	0.124766	0	0.0529747	0.0361318	0.0371703	0	0.147126	0	0.228802	0.546465	0.47163	0.44112	0.359873	0.257559	0.296657	0.168077	0.0290555	0	0	0	0.0591944	0
CG34125	29.2733	20.5229	30.6405	33.9193	25.7912	11.4971	38.0637	31.7601	14.7806	27.6376	25.7703	19.2354	28.3306	15.3907	31.8186	32.5154	37.5728	21.491	27.8656	24.2235	31.2842	40.7901	40.5581	14.2785	18.9656	36.9231	42.1659	26.7334	25.9649	36.1943	30.6547	41.2429	21.7414	22.5629
Trip1	124.653	122.679	131.01	106.643	106.523	93.324	130.938	135.19	69.0875	108.839	107.108	109.574	95.9546	71.4392	72.6114	107.247	102.515	91.3428	114.025	122.931	83.4312	133.168	108.421	85.5431	99.4781	110.514	125.117	127.807	96.2514	95.3463	91.2852	91.8497	71.3988	97.5832
Scox	95.8116	90.6461	83.6388	82.917	70.7895	78.4079	91.1274	60.3857	66.3024	108.58	77.437	39.163	69.6182	68.2508	76.4063	81.3242	66.49	72.0175	78.2422	73.4945	77.124	59.3211	51.5333	50.9067	66.8256	78.0839	60.622	56.3843	70.8598	89.8797	103.502	93.6337	97.7385	79.6313
CG3756	16.8594	12.1989	13.6128	11.5413	12.0543	8.67468	13.2855	11.1312	10.5021	12.0908	9.51745	11.8321	8.47152	5.62604	6.03773	9.72568	7.70672	10.7909	14.8954	12.9441	9.70969	17.1167	12.6326	11.4459	12.0589	9.99322	11.2404	14.8361	8.4903	10.1017	8.41957	9.07987	7.0696	9.39849
l(2)05714	8.19407	10.253	7.4277	7.18372	8.33739	8.89552	6.59573	9.37623	7.1037	6.45061	6.31377	6.35766	5.90458	9.52474	6.10911	7.19357	7.07681	9.93065	10.1641	9.29153	9.21012	9.41322	5.78408	11.2619	7.65243	6.02448	5.97077	9.72803	8.53485	8.11898	9.04988	8.83323	8.43638	7.53409
CG14043	7.69053	7.8891	8.4371	9.11506	8.82079	6.83485	6.14696	10.0232	6.05023	7.58861	7.17528	7.62812	7.94826	5.66976	5.96645	7.98632	7.61407	8.67432	8.38884	6.56561	8.96567	11.3478	10.0805	8.28044	7.34642	7.79604	10.1802	7.28816	7.05627	6.53178	6.23742	5.60438	5.97944	7.42295
mRpL28	79.5118	74.5649	70.7914	62.2988	52.7139	54.9555	70.2472	64.6972	47.4484	73.4227	57.164	38.7769	77.8193	69.356	55.3857	81.8125	88.4277	61.8957	85.1735	73.0448	55.7713	70.7368	54.868	39.1797	56.3694	56.5491	63.3905	58.241	80.0587	123.658	119.446	98.239	84.8403	93.5596
Gmd	6.22641	6.38718	7.06554	8.75515	8.16171	6.40737	9.91265	13.3394	6.80242	9.65469	10.8946	12.3471	7.43056	6.54696	8.91929	10.7108	7.42343	6.33548	6.32462	7.14549	9.56248	6.4438	10.406	12.4838	8.29178	13.0326	17.3135	8.09834	7.3901	7.42607	6.47806	6.21248	6.57365	6.16675
CG3792	25.099	23.7092	26.9125	29.0172	21.2195	25.8783	30.152	28.0788	28.1621	29.0312	28.8786	33.6132	31.6999	34.0835	31.509	36.5093	34.5121	27.7875	19.1212	22.2361	23.5746	23.7804	21.5362	27.9592	27.1585	25.9345	26.1664	24.5599	32.761	35.3209	38.7044	35.1646	40.7878	34.1838
CG8891	31.8986	24.7732	29.926	29.3085	25.4161	13.9354	31.4466	28.4403	21.5603	25.7226	22.1151	27.539	13.609	12.4144	12.5197	18.4577	12.6362	23.6466	19.3913	24.3107	17.3312	29.9689	22.2144	22.1868	29.3809	20.2509	26.6058	23.0389	14.6315	14.9307	16.9633	17.5548	12.2678	14.8785
CG8892	4.95095	4.70786	4.28283	5.12966	3.27142	2.66191	5.75701	4.47032	3.04514	3.44169	4.0756	3.27943	2.43185	2.17718	2.99083	3.32701	3.4726	5.82829	4.25208	4.15409	3.69075	5.01959	4.66839	3.18226	3.97997	5.40968	6.23086	4.78982	2.98788	3.92773	2.6253	4.07955	2.16831	3.06772
CG34126	13.329	12.1831	14.5833	15.0495	14.1119	14.1853	14.3035	16.7194	16.2171	15.5186	14.696	14.8897	14.8548	17.7343	21.2915	12.8311	15.3914	16.3856	14.1757	14.4881	19.5257	11.408	16.5636	17.0548	14.3124	21.9799	17.836	13.5493	17.7502	13.4786	15.1833	14.5663	18.346	14.6229
Rtnl1	100.673	90.8786	111.418	119.636	102.55	103.784	101.144	85.4861	109.943	94.5243	100.148	112.052	75.2672	98.9686	75.16	66.1323	74.0979	93.1167	84.5077	81.0975	91.5788	121.724	76.94	85.299	96.7734	98.3474	98.9626	90.8922	65.7498	86.8772	85.456	82.3491	91.0103	86.9824
Tfb5	0	0	0	0	0	0	0	0	0	0	0	0	0	0	0	0	0	0	0	0	0	0	0	0	0	0	0	0	0	0	0	0	0	0
CG31917	0	0	0	0	0	0	0	0	0	0	0	0	0	0	0	0	0	0	0	0	0	0	0	0	0	0	0	0	0	0	0	0	0	0
CG3887	100.86	80.198	90.0026	89.5418	78.7949	84.2448	93.5837	67.335	82.4296	93.6934	88.9193	66.7522	79.4935	86.8123	76.3524	85.6473	79.1417	70.0155	76.9032	80.9135	71.5214	82.8184	56.7042	61.05	78.8451	70.1814	67.6224	65.8754	82.4253	83.8266	99.3775	98.5469	90.6996	85.8213
vkg	15.0528	16.9199	20.173	16.9051	12.6232	10.6564	16.8954	14.0568	8.88054	11.5877	12.9879	13.9533	21.4977	12.2807	15.6932	17.2128	16.2852	13.589	26.3942	21.7906	14.2643	24.6116	17.4022	7.61176	10.7256	10.3403	14.1739	34.4202	20.8376	27.613	17.4861	22.674	11.1921	24.4628
Cg25C	19.8946	24.1722	28.3663	25.4936	20.6423	16.7452	20.7857	22.9634	13.7036	15.4621	18.1457	20.868	33.3567	20.647	23.1726	26.4237	23.5334	17.3871	37.283	31.5729	19.9581	35.3168	23.0815	11.6302	17.2486	15.3022	20.4672	54.2361	33.0293	41.1698	27.3679	34.0434	15.685	33.2454
SP555	0	0	0	0	0	0	0	0	0	0	0	0	0	0	0	0	0	0	0	0	0	0	0	0	0	0	0	0	0	0	0	0	0	0
CG14042	0	0	0	0	0	0	0	0	0	0	0	0	0	0	0	0	0	0	0	0	0	0	0	0	0	0	0	0	0	0	0	0	0	0
CG31650	18.9694	16.1376	15.1802	18.8228	15.0586	20.2579	20.4117	17.5134	19.4226	29.9982	23.2605	16.1461	18.0988	30.7649	23.329	22.8919	23.7042	15.0109	21.5971	14.7841	18.9057	15.5137	18.0799	14.9055	19.4137	21.2224	17.9393	16.6191	23.5791	38.2494	40.0183	31.0571	42.9344	28.0077
CG33995	0	0	0	0	0	0	0	0	0	0	0	0	0	0	0	0	0	0	0	0	0	0	0	0	0	0	0	0	0	0	0	0	0	0
CG44001	0	0	0	0	0	0	0	0	0	0	0	0	0	0	0	0	0	0	0	0	0	0	0	0	0	0	0	0	0	0	0	0	0	0
CG44000	0	0	0	0	0	0	0	0	0	0	0	0	0	0	0	0	0	0	0	0	0	0	0	0	0	0	0	0	0	0	0	0	0	0
CG9121	0.425865	0.524233	0.0780648	0.264742	0.479573	0.52589	0.858561	0.723011	0.994191	0.520023	1.22506	1.28448	0.577771	0.225235	0.54515	0.148729	0.631142	0.117417	0.529913	0.289106	0.588636	0.281177	0.485343	0.847366	0.791175	0.364441	0.394323	0.674561	0.179402	0.528234	0.204702	0.243359	0.319807	0.688352
eIF-3p40	112.614	103.541	114.983	104.017	102.002	64.4699	126.615	115.292	64.3799	94.3195	95.1504	98.6154	83.6552	61.4828	72.623	90.7937	97.1547	82.9543	104.697	107.744	83.6011	124.773	102.691	78.1025	82.6072	111.438	116.549	121.727	84.3073	90.1436	75.166	93.2583	58.2485	81.8493
CG14040	16.509	15.863	14.933	20.018	16.5976	16.247	13.0322	11.5866	16.2497	14.085	14.6464	15.4679	12.6606	18.4543	13.8427	13.407	13.7276	17.8891	12.6229	12.3331	14.6148	12.217	13.1083	16.0095	15.616	13.5727	12.2738	14.0837	14.2485	13.5508	15.5622	15.5517	18.046	13.7433
CG14036	0.792517	4.0649	0	1.36854	0	1.6311	0	0.298999	0.212661	0	0	0.181088	0	0	0	5.42026	0.355918	0	0	0	0.730285	0.290699	0.273698	0.187728	0.626529	0.205518	0	0.107293	2.8749	0	0	0.1258	0	0.251175
His3.3A	101.619	87.2445	90.916	80.4013	75.2786	52.7617	115.316	92.1435	51.1277	94.0996	77.181	52.7193	93.478	67.4871	75.4629	93.8156	99.7793	65.9058	99.2488	111.005	75.5503	99.4974	62.6318	41.5637	62.2602	76.7211	82.9177	79.2152	94.9816	122.3	108.036	119.659	84.4055	82.566
CG31918	0.969758	1.41366	1.12273	1.16341	1.02181	0.866634	0.445894	1.67529	1.15045	0.498599	0.802941	0.94466	0.615519	0.620873	0.555358	1.09179	0.9398	0.844346	0.952652	1.31668	0.752513	0.505486	1.48065	2.15808	1.25085	0.595613	1.09764	0.808462	1.03923	0.438292	0.669095	0.291665	0.40154	0.60661
Rpn11	49.7121	45.395	43.8075	60.339	45.6625	35.7802	42.0326	64.7218	37.5512	38.2856	63.4597	52.4618	37.3969	30.1423	32.6765	42.0656	43.2747	36.9728	43.9288	41.876	42.631	72.9385	64.8522	63.4723	47.1375	46.8714	69.1783	52.752	39.0728	37.0593	33.3169	45.4305	33.3961	31.7841
CR45291	1.73215	0.533062	0.635036	0.358935	2.16733	2.13899	0	0.3921	0.557757	0.282017	0.311423	0.474949	1.82778	1.28256	1.55213	1.81481	1.86697	0	0.615814	0	0.638453	0	0	0.615455	0.273872	0.269512	0.310424	0.140702	1.09454	2.47906	0.756905	2.80451	2.84931	1.48224
qtc	4.02348	4.99278	2.76577	2.72311	5.60272	5.96019	4.36102	5.54548	3.89194	4.46402	5.68788	8.20745	4.98909	3.29493	4.71433	4.61777	6.30971	4.47311	4.90268	5.63904	3.91684	4.10615	4.21899	3.49328	3.86055	3.83696	6.37712	6.10163	3.86148	4.90705	3.40289	2.73494	3.00522	5.83085
CR43820	0	0	0	0	0	0	0.0963532	0.162282	0	0	0.0644457	0	0	0	0	0	0	0	0	0	0	0	0	0.101889	0	0	0.0428259	0.0582335	0.100668	0	0	0	0	0
mir-2495	0	0	0	0	0	0	0	0	0	0	0	0	0	0	0	0	0	0	0	0	0	0	0	0	0	0	0	0	0	0	0	0	0	0
CR45305	1.5566	0	0.475565	3.22558	0	0	0.697373	1.17454	0.835385	1.26718	0.466436	0	0.782164	1.09769	0.996304	1.13256	0.699068	0	0	0	0.478124	0.57097	0.537577	1.8436	0	0.403664	0.92988	0.632212	0.910752	0.495072	0.680197	0.494175	0.742186	0.49334
RpL37A	622.319	535.732	604.505	560.539	746.62	686.148	550.504	612.333	653.217	610.622	482.661	611.768	440.995	479.412	504.018	587.684	444.202	547.716	564.104	531.755	538.872	650.396	494.099	584.674	580.979	490.054	579.745	591.15	484.559	410.274	399.935	461.014	529.273	434.962
pgant5	7.58654	9.79333	8.42342	10.3135	15.3856	23.6569	14.2341	13.9174	17.092	10.5489	15.7568	20.9765	13.3935	12.145	12.7586	14.7591	17.5729	29.4806	10.137	20.048	9.57132	10.9257	16.4324	18.9596	19.623	16.5972	13.9763	14.8583	12.101	11.6109	9.92314	7.46796	14.3294	18.8441
CG5828	11.9594	12.6056	9.15273	9.60312	9.27774	4.79973	10.6489	8.79844	5.00627	9.2003	7.74068	6.64045	5.99437	5.31318	5.20515	7.90967	9.82886	5.77043	11.2673	8.28125	8.04484	10.9889	8.08491	6.39526	6.50004	10.3741	9.75196	8.74315	7.28423	8.30147	7.2641	8.11557	6.5647	7.07847
CG4230	68.4361	72.7379	62.7705	60.6661	50.8408	66.7266	59.9447	44.2941	56.3373	84.3597	50.8634	33.6701	70.5817	83.7953	79.7136	74.3083	65.9751	56.8404	67.6142	62.6232	56.6226	43.4491	41.3477	38.7002	55.0497	56.1927	38.765	44.0953	65.9586	83.3484	101.493	87.7852	90.1081	79.5211
CG8680	256.062	304.896	255.836	241.404	192.328	168.672	257.912	197.335	161.074	289.401	166.719	109.695	335.85	288.516	248.831	385.653	372.691	224.621	320.07	321.948	211.901	250.644	145.919	93.096	165.093	162.937	172.549	161.152	364.638	493.85	563.496	490.18	361.972	393.883
Msp300	15.7695	9.84832	22.1625	24.119	16.0975	8.78685	13.6273	10.837	17.596	14.5458	15.7213	11.3894	11.4248	12.7073	19.4247	8.66439	12.8122	22.8614	13.269	15.2867	24.4493	19.5091	21.1865	16.6833	13.9855	15.509	19.2293	13.8187	10.0034	12.2768	14.8176	15.6134	11.4342	10.5781
snoRNA:Psi28S-2263	0	0	0	0	0	0	0	0	0	0	0	0	0	0	0.510749	0	0	0	0	0	0	0	0	0	0	0	0	0.3241	0	0	0	0	0	0.758723
snmRNA:765	0	0	0	0	0	0	0	0	0	0	0	0	0	0	0	0	0	0	0	0	0	0	0	0	0	0	0	0	0	0	0	0	0	0
snmRNA:128	0	0	0	0	0	0	0	0	0	0	0	0	0	0	0	0	0	0	0	0	0	0	0	0	0	0	0	0	0	0	0	0	0	0
snoRNA:Psi18S-525k	0	0	0.757508	0.856315	0	0	0	0	1.33065	0	0.742967	0	0.622938	0.437118	0	0.360802	0.742343	0	0.734579	0	1.52317	0.909473	0.428142	0	0.65338	0	0.493722	0.335675	0.29014	0	0.361152	0.78715	0	0
snmRNA:158	0	0	0	0	0	0	0	0	0	0	0	0	0	0	0	0	0	0	0	0	0	0	0	0	0	0	0	0	0	0	0	0	0	0
Cyp28d2	3.52725	1.91558	4.75423	4.72944	3.98074	2.24191	3.85764	2.58322	5.34487	3.26553	4.41428	5.73658	2.03302	2.23131	2.70028	1.50963	1.8015	4.00446	2.27443	1.97197	5.09847	4.18586	3.40364	4.64449	3.33525	4.19685	3.61512	2.16292	1.79668	1.71573	2.38753	2.27252	1.92911	1.80837
Cyp28d1	82.362	113.52	76.0787	98.1612	182.293	200.144	54.0981	86.5787	62.0393	46.4269	66.867	71.5172	189.416	268.856	358.11	261.62	238.225	109.695	167.268	61.2078	128.513	79.6084	61.3114	103.506	55.1272	75.7657	85.6426	68.8496	217.793	145.324	205.778	177.092	363.487	208.77
CG7742	0	0	0	0.0546418	0	0.162813	0.177204	0.0596907	0.0849092	0.0429323	0.142227	0.0723031	0.0794998	0.0836779	0.13502	0.0690687	0.0947384	0	0.0468738	0	0.194388	0	0.0273199	0.112431	0.16677	0.164115	0.0787615	0.128517	0.0370278	0.0503195	0.0460905	0.0502283	0.0377182	0.0501435
CG14034	0.101587	0.156315	0	0.315762	0.127109	0.313618	0.136536	0	0.327113	0.0826985	0.273965	0.0696369	0.0765683	0.107456	0.0650207	0.0886957	0.228113	0.28009	0.0902906	0.137928	0.28083	0.447151	0.6315	0.216571	0.321241	0.158063	0.151714	0.371335	0.0356625	0.096928	0.0443909	0.0967524	0.108982	0.0965889
TpnC25D	8.05324	4.84276	1.78166	10.4539	20.1531	19.0036	13.2498	35.3072	15.1268	4.672	19.8877	10.3429	20.9307	10.7706	8.82778	10.0216	22.3238	21.6935	10.9423	10.3058	5.88552	26.4839	28.5793	5.65706	16.4286	8.71365	15.2343	16.8052	10.1711	4.50436	8.2516	1.58689	9.66564	17.8664
tkv	33.4359	29.9616	30.1192	33.1825	38.5377	39.0007	34.5197	29.3651	33.6189	32.6373	40.0998	34.5321	33.3264	33.0624	38.3574	35.0953	28.1447	37.278	34.4505	28.5637	35.0194	31.5946	35.9937	39.8511	40.2272	33.2411	33.7185	38.4394	32.5103	28.5777	32.8939	37.0651	34.4138	28.3909
CR44744	0	0.169403	0.20181	0	0.275505	0.169939	0.147968	0	0.0886255	0	0.148452	0.30187	0.0829793	0	0.0704649	0.0961222	0.0494425	0	0.0978506	0.149477	0.101448	0	0.171094	0.117352	0.0870345	0.0856489	0.0328835	0.044714	0.115945	0.157566	0	0.0524267	0.0393691	0
Cyp4ac1	48.061	35.3734	66.5206	51.3789	45.2756	45.8842	21.9363	19.8093	25.4948	18.0359	14.4535	21.3288	40.6218	65.4942	63.8344	35.5041	28.1966	45.1916	34.3215	27.8179	34.1112	28.0485	11.8369	20.4328	12.9578	7.78058	8.73348	19.6327	32.7687	41.9139	41.3049	50.5694	62.4379	29.98
Cyp4ac2	40.2844	33.4416	49.2712	44.1235	41.7644	42.7441	17.5169	19.1576	24.6898	21.1646	15.0332	15.4085	28.5771	42.8268	40.2577	29.1724	20.6457	48.7213	43.8684	23.2571	32.8786	33.3775	12.7315	11.932	13.1402	8.3749	12.2752	21.0086	21.5338	24.4833	24.7333	21.6017	53.0225	28.7751
Cyp4ac3	6.34014	3.65841	4.8205	4.77745	6.13006	4.8933	1.88825	6.11588	7.3078	3.22581	3.91839	3.80284	7.33096	10.7075	6.82483	9.05823	6.14768	5.56203	5.25091	4.40193	8.69703	3.96408	5.03853	2.73912	4.7844	2.07387	3.31402	3.24806	7.41066	4.88074	5.478	4.59742	8.86279	5.58294
Bsg25D	14.3904	14.8818	15.6732	11.7149	11.8967	11.2147	13.7052	14.3309	13.5214	13.2742	12.8208	10.9374	13.4523	12.7385	10.4217	13.3802	11.9078	15.5872	14.0983	14.1463	13.4757	13.419	13.2877	17.182	13.2417	14.4485	14.0601	13.5869	13.1544	13.5633	14.2915	14.8292	15.5633	12.3164
Bub1	5.7056	5.49232	5.55163	5.21114	5.61652	5.34272	5.23347	4.25418	4.46245	5.32714	5.32352	4.54137	4.76921	5.20577	4.51724	5.06421	4.27468	5.44254	5.91234	4.73613	5.50675	4.99902	5.28099	5.39966	5.38707	5.65893	6.00104	4.70054	4.18631	5.79224	5.65993	6.02641	6.52708	4.5636
CR44743	0	0.153353	0.182689	0.309778	0.374102	0.153838	0.133948	0.225601	0.240686	0.0811314	0.179182	0	0.0751174	0	0.0637886	0.087015	0	0	0	0.135314	0.091836	0.109669	0.258139	0.177056	0.0393942	0	0.178607	0.0404776	0	0	0.0435498	0	0.106917	0.0947587
CR44742	0	0	0	0	0	0	0	0	0	0	0	0	0	0	0	0	0	0	0	0	0	0	0	0.0799851	0	0	0	0	0	0	0	0	0	0
vri	77.3988	83.2544	78.3019	53.6557	64.4916	63.1281	127.178	104.625	97.0371	164.834	117.382	85.3083	93.5051	122.509	95.9995	112.515	82.6117	63.9525	101.409	81.1192	88.0602	71.0652	71.3106	118.193	100.632	185.543	89.147	71.8552	91.5161	106.173	113.477	148.489	146.57	87.4384
CR45730	0	0.401902	0.239393	0.270619	0.326812	0.806345	0	0	0.420521	0	0	0.358088	0	0.828846	0.6687	0.684138	0.351901	0	0.464294	0.709256	0.722043	0	0.135304	0.464022	0	0	0.624118	0.530411	0.45846	0.373818	0.228268	0.497521	1.40102	0.620851
CG14024	0.221153	0.340296	0.405394	0.412445	0.110686	0.0682742	0.267513	0.250309	0.640909	0.252047	0.755463	0.848953	0.266701	0.327504	0.254789	0.115854	0.198639	0.243901	0.0786246	0.480429	0.611363	0.194688	0.458256	0.345746	0.594436	0.240871	0.171746	0.323356	0.186328	0.400921	0.328571	0.0842515	0.142352	0.252328
Ncoa6	5.7387	6.38337	7.62562	7.46216	6.37304	7.39965	8.02274	7.99516	7.02232	7.364	7.28242	6.96715	7.28715	7.6427	8.9835	6.22285	6.97098	7.84767	7.68158	6.8216	7.83655	6.8729	7.53353	7.03836	5.84405	9.68214	7.64455	7.85815	6.53732	7.88892	8.42436	8.30815	7.67292	6.82594
CR44985	0	0	0	0	0.542238	0	0	0	0.348859	0.352785	0.194785	0	0.326634	0.2292	0.277373	0	0.194622	0	0	0	0	0	0.224494	0	0.342596	0	0	0	0	0.62023	0	0	0	0.20602
cype	901.277	1158.98	899.606	910.614	620.159	593.983	1137.61	955.617	535.318	1205.93	762.381	369.08	1517.18	1184.07	1170.32	1712.77	1704.86	796.333	1482.72	1212.86	762.692	1218.38	630.976	308.028	620.861	683.577	812.636	659.363	1530.86	2177.56	2148.66	2087.38	1381.53	1519.34
CG14022	243.305	336.424	213.241	178.355	166.761	254.759	215.024	187.805	269.15	298.906	163.441	115.812	286.513	396.087	277.606	292.769	305.568	233.395	327.766	332.513	207.029	241.959	114.088	232.928	218.652	174.788	120.167	200.88	361.277	407.738	551.134	451.029	490.113	402.263
TotM	17.398	28.0611	65.8977	41.916	40.3909	170.193	27.6094	466.194	45.8977	68.2562	31.9395	65.5223	1161.71	30.0439	52.5923	52.4339	22.3106	38.1439	46.9492	34.4368	101.02	24.4503	88.9325	563.433	103.156	51.0423	115.765	160.82	152.323	37.2003	89.0318	49.4107	681.744	100.349
fusl	12.6773	13.17	20.3831	10.6118	16.2656	12.3824	7.34011	4.37754	5.3333	4.98517	4.63578	5.2534	17.9227	14.5462	13.5923	14.1172	13.1559	16.8842	20.53	15.2189	15.0808	11.507	3.48768	3.55009	3.93525	4.81985	5.69056	8.87237	16.4817	16.5208	16.1809	14.7514	19.1837	17.791
CG12512	26.9271	30.8584	24.525	9.98062	13.8152	24.4343	11.0541	17.5975	10.6115	10.5475	8.81143	6.1785	37.8736	35.0673	21.4892	32.0435	36.4811	21.7444	25.535	26.4638	14.5346	19.3407	12.344	11.5891	15.1862	12.6217	8.24472	23.2456	51.0612	57.2429	52.0382	50.1645	40.6315	44.3755
nompC	0.167935	0.187933	0.209891	0.363813	0.553972	1.57891	0.533496	0.604783	0.565337	0.34799	0.816587	0.690709	0.64439	0.77515	1.2703	1.33962	1.42611	1.47325	0.325661	1.63754	0.253225	0.117599	0.340073	1.32358	0.862955	0.190035	0.328323	0.657265	0.846799	1.21632	0.967329	0.712475	1.20107	0.958039
CR42850	0	0	0	0	0	0	0	0	0	0	0	0	0	0	0	0	0	0	0	0	0	0	0	0	0	0	0	0	0	0	0	0	0	0
CR44745	0	0	0	0	0	0	0	0	0	0	0	0	0	0	0	0	0	0	0	0	0	0	0	0	0	0	0	0	0	0	0	0	0	0
H15	0.282041	0.0542482	0.129252	0.0730555	0	0.0544197	0.11846	0.159612	0.227046	0.0574001	0.142617	0.16917	0.10629	0.223753	0.0451302	0.261642	0.110831	0	0.219344	0.0957344	0.324868	0.0387953	0.0547897	0.11274	0.153292	0.054855	0.0421213	0.157507	0.259906	0.235468	0.138651	0.0839434	0.0504289	0.268165
CR43713	0	0	0	0	0	0	0	0	0	0	0	0	0	0	0	0	0	0	0	0	0	0	0	0	0	0	0.0452956	0	0	0	0	0	0	0.0720936
CR43714	0	0	0	0	0.20653	0	0	0	0.132875	0	0	0	0.12441	0	0	0	0	0	0	0	0	0	0	0	0	0	0	0	0	0	0	0	0	0
CR43715	0	0	0	0	0	0	0	0	0	0	0	0	0	0.109085	0	0	0	0	0	0	0	0	0	0	0	0	0	0	0	0	0	0	0.0737556	0
CR31647	0.0763746	0.11752	0	0	0	0	0	0.0864432	0.0614821	0	0.068657	0	0	0	0	0	0	0	0	0	0	0	0.0395643	0.0542737	0.0905676	0	0.0684367	0	0	0	0	0	0	0
snoRNA:Me28S-A2486	0	0	0	0	0	0	0	0	0	0	0	0	0	0	0	0	0	0	0	0	0	0	0	0	0	0	0	0	0	0	0	0	0	0
mid	0.0396259	0.243894	0.290551	0.164225	0.0495814	0.48933	0.239662	0.0448498	0.127596	0.0322581	0.249352	0.353121	0.179201	0.209577	0.2029	1.02062	0.373714	0.218508	0.246537	0.215206	0.292114	0.218024	0.164219	0.168955	0.234948	0.154139	0.106522	0.064376	0.236484	0.283564	0.225102	0.0943501	0.113361	0.226058
CR45287	0.403162	1.24072	0	0.417715	0	0	0	0.456312	0	0	0.181211	0.276364	0.303872	0	0.258044	0	0	1.11158	0	0.547387	0	0.443645	0	0.143249	0.159361	0	0	0.163744	0	0	0	0	0	0
CG14020	0.0953895	0.146779	0.0874288	0	0	0.147243	0	0	0.0767893	0.0776534	0	0.0653887	0.0718972	0.100901	0.122108	0	0.0856785	0.263003	0.0847824	0.129514	0.0878991	0.104968	0.0988292	0.0338931	0	0.0742102	0.0284918	0	0.0334868	0.0455074	0.0416828	0.0908499	0	0
CG7382	221.251	194.885	157.882	130.009	114.453	124.3	190.014	122.703	124.194	171.415	160.884	81.7281	115.594	99.5132	104.333	120.478	126.984	132.567	164.569	167.361	137.84	164.893	104.152	95.327	126.548	163.409	130.069	136.855	145.508	167.715	187.213	204.083	170.074	153.377
cl	261.311	186.249	268.534	323.486	255.99	117.49	300.494	245.278	179.916	254.691	261.491	202.944	98.4172	77.0084	86.9878	117.18	108.21	213.87	183.275	202.519	243.324	335.209	266.381	217.275	223.637	245.41	316.451	196.248	95.3652	102.846	106.207	119.667	90.1507	89.2718
CG7371	49.4746	39.2548	47.3512	44.5142	42.8724	44.4042	43.1107	34.6734	54.564	47.4009	44.1393	40.7924	25.383	31.1345	30.129	26.3512	22.4347	39.8778	30.691	35.5794	38.4094	38.9379	37.4901	47.3513	47.0024	47.1261	38.2429	31.4308	22.989	24.8759	32.2072	29.0497	34.1626	24.0023
CG6907	13.2949	12.5727	10.7892	10.8333	13.0828	7.90951	10.8888	10.9722	7.58096	9.86468	8.09216	8.2117	12.0561	7.58089	7.57871	11.4265	10.2933	11.455	14.0322	13.1622	11.4853	15.2395	11.1199	7.97152	9.36082	10.1276	14.2503	11.0526	10.5013	12.8504	13.253	13.1239	9.40946	9.54647
CR44793	0.548897	0.168921	0.301853	0	0.13736	0.508364	0.295093	0.497007	0.0883733	0.536206	0.444088	0.376264	0	0	0.0702643	0.143773	0.0986035	0	0.195144	0.447154	0.202318	0.241606	0.170607	0.819127	0.26036	0.341621	0.360689	0.535041	0.115615	0.104745	0.0479709	0.0522775	0	0.0521892
Cap-D3	2.48618	2.37449	2.20012	2.78318	2.07387	2.73488	2.95742	2.91097	2.92158	2.72182	3.12123	2.91878	2.30467	2.66006	2.26803	2.43267	2.07907	2.36371	2.7685	1.78479	2.0013	2.67294	2.50181	3.34057	2.53026	3.17916	2.70578	2.73912	2.07662	2.08587	3.18427	2.38147	2.65695	2.30952
CG31648	38.2685	39.8514	30.5871	30.8388	21.1201	26.4527	30.133	16.6254	24.5829	36.7124	20.3282	14.2204	34.3795	45.7951	33.648	41.9623	41.2009	28.0654	35.5019	33.0645	25.5275	24.1041	19.2902	15.7033	22.1043	14.936	16.9339	18.1593	33.4727	50.3443	51.9689	46.7556	44.6483	39.8773
CG31915	4.04767	2.93516	3.24081	4.04916	4.01675	3.94986	5.00246	6.37167	5.28086	6.13565	3.45045	6.79309	6.10163	7.30814	6.67033	5.15887	4.24154	4.10483	4.05244	3.47427	3.42973	4.40292	6.74836	7.02564	5.60903	6.22554	6.21172	6.61361	4.26285	5.5711	5.02157	4.25384	4.54197	5.08713
CG7277	145.067	141.08	126.084	118.464	95.5857	64.917	152.605	114.387	60.2193	133.01	115.234	62.0092	138.755	90.4975	112.15	140.924	120.612	101.236	151.761	149.461	106.289	159.555	95.8141	48.2378	86.027	131.265	141.388	82.6505	112.894	164.122	176.712	177.256	113.993	127.848
tomb	0	0	0.126855	0.573608	0.346358	0	0	0	0	0.112672	0.0622101	0	0	0	0.0885868	0.0604213	0.124316	0	0	0	0.127538	0	0.0716984	0	0.109418	0.107676	0.0826807	0	0.194352	0.132059	0.18144	0.131819	0.0989878	0.0657983
CG14015	0.161603	0.580214	0.24686	0.334872	0.539209	0.498898	0.651595	0.365814	1.5611	0.74548	1.18639	2.5848	0.243607	0.2849	0.413735	0.188127	0.701563	0.297041	0.766041	0.365689	1.24094	0.0592766	0.613909	0.401937	0.660072	0.209537	0.193076	0.415686	0.397118	0.513971	0.329543	0.179564	0.231156	0.973129
Hel25E	34.7593	31.266	35.4797	37.2323	34.7231	25.4113	34.7062	34.3907	27.3378	28.1432	35.8134	34.3705	29.2477	22.1651	24.8668	33.5311	24.1231	29.957	31.6048	29.9512	29.4293	38.5602	35.4035	28.1603	31.2348	33.0794	38.5364	32.4185	25.5771	26.411	27.2949	28.8941	24.0692	25.1111
Lam	11.8897	12.292	13.4515	14.2116	12.5136	14.0036	12.5052	9.04149	10.5683	12.0987	13.068	10.4637	9.31156	8.05691	12.4455	11.1513	8.78814	10.0735	12.4939	9.54288	11.7549	12.2318	12.6231	9.56025	10.5132	12.574	12.6515	11.3431	8.77173	10.3842	12.2175	9.08266	13.3752	10.4215
Oscillin	8.82644	9.83489	11.3444	14.4008	10.3458	12.998	10.4653	9.30108	10.4947	11.6039	12.5402	11.1968	12.8848	17.546	22.7922	13.7519	14.9217	10.6294	11.2264	7.64494	10.5173	12.2805	10.4323	7.11941	11.0682	11.997	9.66664	10.5897	14.2284	18.2711	19.861	18.0206	19.6817	15.5545
CG14014	0	0	0	0	0	0	0	0	0	0	0	0	0	0	0	0	0	0	0	0	0	0	0	0.0364795	0	0	0	0	0	0	0	0	0.0367142	0
CG18269	0	0	0	0	0	0	0	0	0	0	0.113183	0.0863074	0	0	0	0	0	0	0	0	0	0	0	0.044736	0	0	0	0	0	0	0	0	0	0
CG14013	0	0	0	0	0	0	0	0	0	0	0	0	0	0	0	0	0	0	0	0	0	0	0	0	0	0.0942587	0	0	0	0	0	0	0	0
CG14017	0	0	0	0.101683	0	0	0.0659517	0	0.158007	0.0798928	0	0.0672743	0	0	0	0	0	0	0	0	0	0	0	0	0	0	0	0	0	0	0	0	0	0
GluRIIA	0.569112	0.930441	0.32601	0.442241	0.801106	1.0981	0.478064	0.805173	1.17398	0.347471	1.59876	1.1216	2.46647	1.33567	0.978948	1.25776	2.01275	1.37298	0.537442	0.338057	1.01607	0.6654	0.902876	0.568723	0.80141	0.525768	0.775567	1.11238	1.12381	0.712702	0.761606	0.491212	0.941251	1.33587
GluRIIB	0.0392362	0	0	0	0	0	0.0791018	0.0444088	0.126342	0.0319409	0.12345	0	0.236585	0.207516	0.0753393	0.0685144	0.0528627	0	0.0697464	0	0	0.0863521	0.0609765	0.0557645	0.139583	0.0305246	0.0117194	0.0796786	0.123966	0.0748735	0.137162	0.112107	0.126277	0.0932645
CR44794	0	0	0	0	0	0	0	0	0	0	0	0	0	0	0	0	0	0	0	0	0	0	0	0	0	0	0	0	0	0	0	0	0	0
snRNA:U4:25F	0	0	0	0	0	0	0	0	0	0	0	0	0	0	0	0	0	0	0	0	0	0	0	0	0	0	0	0	0	0	0	0	0	0
CG14011	0	0	0	0	0	0	0	0	0	0	0	0	0	0	0	0	0	0	0	0	0	0	0	0	0	0.12148	0	0	0	0	0	0	0	0
CG7251	0	0	0	0	0	0	0.062556	0	0	0	0.0418404	0	0	0	0	0	0	0	0	0	0	0	0.0482219	0	0	0	0	0.0378073	0	0	0	0	0	0
CG18266	0	0	0	0	0	0	0	0	0.0516327	0	0	0	0	0	0	0	0	0	0	0	0	0	0.0332261	0	0	0	0	0	0	0	0	0	0	0
CG14010	0.154896	0.178758	0.141969	0.200609	0.339171	0.179323	0.364324	0.0438291	0.904022	0.346763	0.574382	0.663625	0.175123	0.28673	0.520492	0.10143	0.452164	0.106768	0.309762	0.105154	0.499566	0.17045	0.320963	0.275183	0.47451	0.0903785	0.104098	0.361738	0.149536	0.0923703	0.2369	0.0184406	0.249258	0.460236
CR44795	0	0	0	0	0	0	0	0	0	0	0	0	0	0	0	0	0	0	0	0	0	0	0	0	0	0	0	0	0	0	0	0	0	0
CR44796	0	0	0	0	0	0	0	0	0	0	0	0	0	0	0	0	0	0	0	0	0	0	0	0	0	0	0	0	0	0	0	0.113143	0	0
Cyp6a16	0.231322	0.142377	0.212017	0.095869	0.463103	0	0.559627	0.209455	0.22346	0.414286	0.124768	0.126856	0.523058	1.93303	1.51019	0.787676	2.95038	0.255116	0.37008	0.188445	0.25579	0.10182	0.119832	0.164384	0.0731493	0.539886	0.248736	0.131532	0.61717	0.353142	1.33428	0.440628	0.496324	0.79179
CG31646	0.200811	0.247196	0.147242	0.291284	0.301515	0.495954	0.377854	0.227285	1.00226	0.719284	0.758182	1.0737	0.363254	0.254897	0.565529	0.0701315	0.739509	0	0.428356	0.272649	0.481111	0.265171	0.416105	0.356754	0.619135	0.24996	0.155948	0.309925	0.197388	0.498165	0.245699	0.0765019	0.258516	0.439143
CR44822	0	0	0	0	0	0	0	0	0	0.0961159	0.053069	0	0.0889911	0.0624454	0	0	0	0	0	0	0	0	0	0	0.04667	0	0	0	0.0414485	0	0	0.056225	0.0422213	0
mir-959	0	0	0	0	0	0	0	0	0	0	0	0	0	0	0	0	0	0	0	0	0	0	0	0	0	0	0	0	0	0	0	0	0	0
mir-960	0	0	0	0	0	0	0	0	0	0	0	0	0	0	0	0	0	0	0	0	0	0	0	0	0	0	0	0	0	0	0	0	0	0
mir-961	0	0	0	0	0	0	0	0	0	0	0	0	0	0	0	0	0	0	0	0	0	0	0	0	0	0	0	0	0	0	0	0	0	0
mir-962	0	0	0	0	0	0	0	0	0	0	0	0	0	0	0	0	0	0	0	0	0	0	0	0	0	0	0	0	0	0	0	0	0	0
mir-963	0	0	0	0	0	0	0	0	0	0	0	0	0	0	0	0	0	0	0	0	0	0	0	0	0	0	0	0	0	0	0	0	0	0
mir-964	0	0	0	0	0	0	0	0	0	0	0	0	0	0	0	0	0	0	0	0	0	0	0	0	0	0	0	0	0	0	0	0	0	0
CR44821	0	0	0	0	0	0	0	0	0	0	0	0	0	0	0	0	0	0	0	0	0	0	0	0	0	0	0	0	0	0	0	0	0	0
Hsp60C	0.0535187	0	0	0	0	0	0	0	0	0	0.0240553	0	0	0	0	0	0	0	0	0	0	0.117786	0	0	0	0.041636	0.0159854	0	0	0	0	0	0	0
CG12511	0	0	0	0	0	0	0	0	0	0	0	0	0	0	0	0	0	0	0	0	0	0	0	0	0	0	0	0	0	0	0	0	0	0
CR44819	0	0	0	0	0.125457	0	0	0	0	0	0	0	0	0	0	0	0	0	0	0	0	0	0	0	0	0	0	0	0	0	0	0	0	0
CR44820	0	0	0	0	0	0	0	0	0	0	0	0	0	0	0	0	0	0	0	0	0	0	0	0	0	0	0	0	0	0	0	0	0	0
CG7236	0.139127	0.0713598	0.382549	0.192199	0	0.0715853	0.186991	0.157469	0.0746657	0.151012	0.208448	0.190741	0.174772	0.269804	0.326511	0.303681	0.249927	0.127865	0.0412188	0.125932	0.341873	0.102065	0.144144	0.131823	0.164982	0.288632	0.0969634	0.376709	0.179084	0.176996	0.405301	0.176675	0.281927	0.220471
CG14007	0.106154	0	0	0	0.265647	0	0	0	0	0.0864161	0	0	0	0	0	0.0463415	0.0476734	0	0	0	0	0	0.0549907	0	0.0419602	0	0.0317069	0	0	0	0	0	0.0379604	0
CR44818	0	0	0	0	0	0	0	0	0	0	0	0	0	0	0	0	0	0	0	0	0	0	0	0	0	0	0	0	0	0	0	0	0	0
CG34011	0	0	0	0	0	0	0	0	0	0	0	0	0	0	0	0	0	0	0	0	0	0	0	0	0	0	0	0	0	0	0	0	0	0.0504655
CG11149	19.3908	4.65952	0.438228	0.715562	14.1587	15.4168	0.392712	8.35796	0.256599	1.47042	0.620844	4.69781	8.60901	0.871024	1.70015	8.20998	0.954344	4.54072	0.99158	3.39013	4.30795	0.526141	0.990742	1.69886	1.72195	1.69454	8.99716	1.18673	6.39693	1.14051	1.09108	2.09979	0.930885	0.55563
sip1	1.70648	1.53706	1.67851	1.12122	1.1978	0.706712	2.01385	1.60169	0.703616	1.45695	1.34696	1.14124	1.69403	0.792472	0.612715	1.39908	1.57014	1.95085	1.47973	1.86486	1.15059	1.55723	1.66021	0.709854	0.937765	1.29521	2.03882	1.43688	1.25658	1.48922	1.12763	1.28832	1.05675	1.30593
CG11030	16.9416	14.6769	15.1719	14.6228	12.2816	11.8129	15.1862	11.549	13.6828	14.8299	13.1733	13.8752	9.61351	9.81079	11.7486	8.82421	9.48876	11.238	10.7203	12.1223	11.5232	11.8691	11.2181	12.4431	12.8891	13.2448	11.222	13.4125	9.34454	10.0533	11.1712	10.6161	10.2327	10.5454
CG14006	0	0.148555	0	0	0	0	0.0648786	0	0.0388592	0	0.021697	0.0330899	0	0	0	0	0	0	0	0	0	0	0	0.0514548	0	0	0	0	0	0	0	0	0	0
CG11147	43.2662	50.5923	72.6257	70.0709	70.4776	87.888	64.4126	69.5436	119.89	62.7335	119.549	88.8449	89.7441	122.151	89.5791	80.3028	92.7292	150.035	80.8473	82.9572	73.8962	82.8251	97.5062	72.8761	117.149	91.5619	93.2792	107.343	90.7036	76.4244	70.5021	88.3608	116.005	106.511
CG11029	0.320519	0.0986386	0.528787	0.0664178	3.85004	6.92652	0.430787	13.4226	15.3264	0.0521848	14.4066	0.175771	12.2724	7.96741	1.14883	8.0036	30.833	26.6883	0.398829	20.5405	0.11814	0.352704	14.711	2.50546	14.3925	1.1969	10.2054	8.14918	2.34041	1.71259	0.812342	0.213686	3.3239	36.3872
obst-E	0.894975	0.885295	1.46479	1.05975	0.959852	2.46693	2.2339	2.74947	2.72746	0.936732	3.10322	1.18317	3.75828	1.58908	1.06382	1.8977	3.6461	8.284	1.13636	4.25299	1.7083	1.89934	1.92073	0.840418	2.88065	1.44226	3.72337	3.79071	2.24417	1.34189	1.28498	1.27857	1.23445	2.85674
CG9171	10.6253	12.8109	7.826	7.61134	20.9413	24.7497	10.9323	11.3513	15.3757	10.1405	17.2561	15.5451	16.7233	12.3767	10.2352	12.2516	18.2936	21.1938	10.4279	15.9586	7.57379	7.66207	13.6779	17.7795	15.9161	9.1276	12.0141	12.4361	12.6104	9.17299	8.89521	6.7025	12.2821	14.1922
CR31912	0	0	0	0	0.0845664	0	0	0	0	0	0.0607566	0	0.0509412	0	0	0	0	0.186345	0.0600707	0	0.062279	0.0743728	0.0350116	0.0480285	0	0.05258	0.0201872	0.0823501	0.0237264	0	0	0	0.0241687	0
CG31913	0	0	0	0	0	0	0	0	0	0	0.0602638	0	0	0	0	0	0	0	0	0	0	0	0.0694553	0	0	0	0	0	0	0.0639635	0	0	0	0
CG14005	13.4274	11.861	14.7378	12.1086	10.0598	11.1309	16.9328	9.475	10.0085	12.1453	13.0764	8.06801	8.43376	9.951	8.80639	9.87811	8.63586	7.9984	12.2289	12.2664	9.54707	8.39113	7.85745	8.01043	9.86155	13.5412	9.2343	9.79612	7.76892	10.2809	9.38064	12.7884	7.43954	8.31416
CG7239	6.86848	4.67464	4.84252	3.2845	5.12341	3.56803	6.56852	5.60623	3.45574	4.62366	4.15586	3.3954	5.07737	4.15661	2.95896	4.18052	5.24979	4.91644	7.3961	6.99418	4.01657	5.95933	4.85814	3.3087	3.96802	5.80589	5.26693	4.66726	4.33553	6.08087	4.55975	6.03841	4.13296	4.64674
CG11034	0.90751	0.768027	0.374298	0.611174	0.227102	0.560331	0.274437	0.513574	0.219166	0.0738773	0.163161	0.653194	13.9538	5.01571	4.5016	9.23086	6.0319	0.500427	0.564617	0.739295	0.418124	0.399455	0.211553	0.32245	0.376655	0.247106	0.393041	0.202721	13.2691	4.04803	4.1837	3.15477	2.90449	8.90904
CR44575	0	0	0	0	0	0	0	0	0	0	0	0	0	0	0	0	0	0	0	0	0	0	0	0	0	0	0	0	0	0	0	0	0	0
CR44576	0	0	0	0	0	0	0	0	0	0	0	0	0	0	0	0	0	0	0	0	0	0	0	0	0	0	0	0	0	0	0	0	0	0
CG43307	0	0	0	0	0	0	0	0	0	0	0	0	0	0	0	0	0	0	0	0	0	0	0	0	0	0	0	0	0	0	0	0	0	0
CG31644	0	0	0	0	0	0	0	0	0	0	0.106355	0	0	0.125146	0	0	0	0	0	0	0	0	0	0	0.0935309	0	0	0	0	0	0	0	0	0
TrissinR	0.604466	0.440579	0.320748	0.263699	0.398069	0.589295	0.363451	0.57613	0.691484	0.414379	0.629183	0.697863	0.64743	0.487956	0.305438	0.486095	0.442916	0.964873	0.367592	0.34556	0.322474	0.0700172	0.659223	0.305206	0.414987	0.173252	0.370597	0.439321	0.335053	0.379437	0.305842	0.10605	0.27304	0.362985
rau	1.22442	2.27656	1.91715	2.59009	1.97888	2.0475	7.71399	9.41213	4.92833	3.40559	5.36587	6.15507	3.15314	3.18394	1.86126	3.98664	3.13892	2.39126	1.94981	2.70146	2.0685	2.58245	6.36927	10.405	5.08185	7.73956	7.4363	4.5171	3.0984	2.36087	2.0064	2.42947	1.84262	2.27985
CG44574	0	0	0	0	0.293667	0	0	0	0.188936	0	0	0	0	0	0	0	0	0	0	0	0	0	0	0.0833922	0.0927721	0	0.0701025	0	0	0	0	0	0.0839288	0
Sfp26Ac	0	0	0	0	0	0	0	0	0	0	0	0	0	0	0	0	0	0	0	0	0	0	0	0	0	0	0	0	0	0	0	0	0	0
CG43185	0	0	0	0	0	0	0	0	0.34371	0	0	0.292681	0	0.112909	0	0.093196	0.383498	0	0	0	0	0.234919	0	0.303412	0	0	0.0637648	0.0867056	0	0.101846	0	0	0.0763411	0.10149
CG9029	0	0	0	0	0	0	0	0.233443	0	0	0	0	0	0	0	0	0	0	0	0	0	0	0	0	0	0	0	0	0	0	0	0	0	0
CR44577	0	0	0	0	0	0	0	0	0	0	0	0	0	0	0	0	0	0	0	0	0	0	0	0.114519	0	0	0	0	0	0	0	0	0	0
CR44578	0	0	0	0	0	0	0	0	0	0	0	0	0	0	0	0	0	0	0	0	0	0	0	0	0	0	0	0	0	0	0	0	0	0
Acp26Ab	0	0	0	0	0.287257	0	0	0	0	0	0	0	0	0	0	0	0.103103	0	0	0	0	0	0	0.0815721	0	0	0	0	0	0.109525	0	0	0	0
Acp26Aa	0	0	0	0	0	0	0	0	0	0	0	0	0	0	0	0	0	0	0	0	0	0	0	0.0429148	0	0	0	0	0	0	0	0	0	0.057419
CR44579	0	0	0	0	0	0	0	0	0	0	0	0	0	0	0	0	0	0	0	0	0	0	0	0	0	0	0	0	0	0	0	0	0	0
CG9021	0	0	0	0	0.10476	0	0	0.189525	0	0.136315	0.0376322	0.172178	0.0631051	0.0442811	0.107176	0.1462	0.0752012	0	0	0.227352	0.0771503	0	0.216859	0.0892454	0.0992835	0	0.0250076	0.0340047	0.0881756	0.119827	0.0365856	0.239221	0.0299399	0.0398028
CR43808	0.195783	0	0.0897217	0.101425	0.122485	0.151104	0	0.664779	0.157606	0	0.0439997	0	0	0	0.0626553	0.0854691	0	0	0	0	0	0	0.101421	0.243474	0.0773885	0.152313	0.175434	0.0397584	0.0687302	0.140103	0.171104	0.0466163	0	0.0930751
bchs	5.32131	4.7312	5.63628	6.59831	5.05024	5.39269	6.2244	7.46658	6.84318	7.54788	7.06414	6.69508	6.85206	7.79871	12.338	5.74314	7.53703	6.01037	5.85487	5.62226	8.18412	4.52529	7.96897	8.56409	5.36573	8.90172	7.19928	6.29815	6.54324	7.67493	9.12641	8.16421	8.50345	6.55744
CG14000	0	0	0	0	0	0	0	0	0	0	0	0	0	0	0	0	0	0	0	0	0	0	0	0.0301631	0	0	0	0	0.0298016	0	0.0370956	0	0.0303572	0
CG9016	0.159817	0.245915	0.146479	0	0.199969	0.246693	0.107399	0	0.257308	0	0	0.219106	0	0	0	0.0697683	0.143547	0.440638	0.142046	0	0.294535	0.175865	0.16558	0.056785	0.442205	0	0.0954711	0.259638	0.112209	0	0.069836	0.0761056	0.0571504	0
CR43926	0	0	0	0	0	0	0	0	0	0	0.0687023	0	0	0	0.0978317	0	0	0	0	0	0	0	0	0	0	0	0	0	0	0	0	0	0	0
dsf	0	0	0	0	0	0	0.0439678	0	0.0526692	0.0266309	0	0	0.0246568	0	0	0	0.0146916	0	0	0.0444162	0	0	0	0.0116235	0	0	0	0	0.0114842	0.0156066	0	0.0155783	0	0
CR45288	0	0	0	0	0	0	0	0	0	0	0	0	0	0	0	0	0	0	0	0	0	0	0	0	0	0	0	0	0	0	0	0	0	0
CR45289	0	0	0	0	0	0	0	0	0	0	0	0	0	0	0	0	0	0	0	0	0	0	0	0	0	0	0	0	0	0	0	0	0	0
Sfp26Ad	0.189065	0	0.173286	0	0.236565	0	0	0	0.152198	0.153911	0.16996	0	0.142502	0.0999942	0.484043	0.0825363	0.0849086	0	0	0	0	0	0.097941	0	0	0	0.225886	0	0.331859	0.0901969	0.247849	0	0	0.179763
Gpdh	147.461	188.38	203.051	170.051	133.249	189.202	105.658	129.466	131.385	204.674	104.939	84.1228	185.02	292.256	206.88	148.86	254.561	120.544	246.531	186.507	114.672	211.914	85.479	78.4161	115.473	100.041	96.6642	132.321	179.218	346.807	241.818	284.907	190.856	252.507
CR44986	0.332016	0	0.304307	0.688001	0.623146	0	0.557798	0.187893	0.133638	0.675707	0.671548	0.796578	0.250248	0.702398	0.212507	0.0724709	0.447323	0	0	0.225395	0.764861	0.365355	0.687976	0.530863	0.787431	0.129149	0.347093	0.202272	0.349666	0.237592	0.290165	0.553376	0.296821	0.394601
CG9044	45.8385	45.6272	39.4486	47.0867	39.4908	45.2467	44.5807	45.3704	50.5616	58.5384	57.0263	52.6625	38.1365	51.1837	68.0837	37.145	42.0057	40.1571	39.1377	38.2366	54.3108	37.0037	49.8754	70.2952	43.256	63.9578	47.8536	41.6843	37.2048	42.7258	51.2469	49.1733	51.6159	41.0349
CG13999	0.222301	0.342061	0	0.345487	0.417227	0.686284	0.224084	0.629017	1.25268	0.452419	1.19902	2.66674	0.502659	0.411504	0.497992	0.194091	0.848596	0.612915	0.691534	0	0.614534	0.366934	0.806108	0.434425	0.7469	0.0864717	0.265595	0.541723	0.390197	0.318158	0.339989	0.476373	0.317978	0.792614
CG13998	0	0	0	0	0	0	0.234916	0	0	0	0	0.239627	0	0	0.223742	0	0	0	0	0	0	0	0	0	0.138177	0	0	0	0	0	0	0	0	0
Vm26Ab	0.18193	1.11977	0.166747	0.188497	0	0.280826	0.12226	0	0	0	0.0817731	0	0	0	0	1.35017	0.0817045	0	0	0	0.167644	1.20119	0	0	0.215739	0	0.0543404	0.0738906	0	0	0	0	0.065058	0
Vm26Ac	0	0	0	0	0.230905	0.284857	0.248029	0	0	0	0.0829468	0.253003	0	0	0	0	0	0	0	0	0	0	0	0	0.14589	0	0.0551205	0	0.064784	0	0	0	0	0
Vm26Aa	0	0.716951	0	0.160918	0	2.39739	0.208744	0	0	0	0	0.532325	0	0.0821429	0	0.203405	0.0697504	0	0	0	0.143116	1.02545	0	0.110369	0.491132	0	0	0	0.109046	0	0	0	0	0
psd	0	0.576937	0.206191	0.233086	0.375315	0.231504	0.907082	0.678996	0.181099	0.183137	0.876344	1.2851	0	0.0396607	0.623954	0.327364	0.0673546	0.413509	0	0.101815	0.207301	0.0825186	0.42731	0.319733	0.237131	0.408373	0.313576	0.152283	0	0	0.262145	0	0.0268159	0
CG13992	0.200099	0.538824	0.13755	0.207322	0.250372	0.540526	1.7481	1.07577	0.523515	0.529406	0.742003	2.8462	0.0754097	0.0264576	0.416239	2.48958	0.134796	0.275851	0.133387	0.0679205	0.0460967	0.0550481	0.233229	0.195519	0.138416	0.583768	0.40343	0.101588	0.0351228	0.0477306	0.0437192	0.0476442	0.0357777	0.0237818
Ucp4C	0.0967454	0	0	0.100238	0.242103	0	0	0	0	0	0.0434847	0	0	0	0.0619219	0.0844686	0	0	0	0	0	0	0	0	0	0	0.115587	0.039293	0	0	0	0	0	0
Ucp4B	0.0991495	0	0	0	0.12406	0	0.0666299	0	0	0	0	0	0	0	0	0	0.0445279	0	0	0	0.182728	0.109106	0	0.140916	0.0783832	0.0771354	0	0	0.0348068	0	0	0.0472155	0	0
CR43465	0.297449	0.152564	0.272625	0.616371	0.496239	0.153047	4.19768	1.68331	1.19724	0.726429	1.11413	8.2239	0.224194	0.157317	0.507685	0.129851	0.222639	0	0.352497	0.538475	0.730911	0.109106	1.54087	1.51485	0.901407	1.54271	0.681141	0.442964	0.278454	0.0473012	0.0866517	0.0472155	0.0354558	0.32995
chic	294.412	218.021	495.402	713.247	547.867	221.289	328.902	319.641	437.911	350.22	445.246	360.42	121.042	150.736	664.726	182.166	121.875	370.9	279.179	272.359	723.18	402.587	481.318	635.195	368.361	467.425	484.806	268.629	124.436	107.884	197.135	153.452	119.635	109.513
eIF-4a	380.575	387.171	424.033	396.874	399.073	378.384	412.614	455.83	290.103	362.759	361.558	428.341	382.006	311.584	404.396	417.724	381.789	362.502	373.67	367.412	357.355	453.908	417.428	365.486	327.755	445.911	440.772	430.53	365.543	320.363	316.925	352.754	327.912	370.945
ifc	36.7467	27.8268	25.1034	35.9489	49.5309	37.7335	36.1053	69.973	36.9873	35.3921	45.2497	50.4151	29.1233	21.9651	21.198	27.7691	34.0682	30.0034	22.8951	34.1894	35.0238	34.3625	47.5761	61.2296	38.7753	67.4821	56.8733	38.155	32.4071	17.9069	18.6073	21.154	19.4759	16.2698
lid	17.1185	16.5905	15.5121	14.5208	13.8144	14.2725	15.3602	16.1369	13.1169	14.5146	15.5122	12.344	19.2138	18.6205	18.0129	15.7789	16.9293	16.4904	18.074	17.2068	16.4893	15.4933	14.6793	16.7482	12.5108	17.4551	15.32	16.3213	18.0399	23.1429	22.6106	21.723	21.4572	19.8574
Tsp26A	4.65885	4.52452	4.30504	4.78745	4.39589	5.423	3.66972	3.02551	6.48636	3.32631	4.58285	3.76949	3.94322	5.69551	4.86391	4.03431	4.08166	5.1591	4.03897	3.31829	3.90594	3.44579	3.42231	5.46808	4.36234	2.34698	2.82872	3.44316	4.1692	4.11726	4.85589	5.14635	5.89928	3.92132
Gal	5.62501	5.54248	3.43705	5.77693	3.95129	10.8153	2.45374	3.35083	2.97906	3.6151	3.81463	3.34854	9.2232	3.86229	5.21094	5.06199	4.67566	4.76152	5.52579	4.2206	9.95742	3.69219	2.96504	1.89345	2.75005	3.30126	3.22761	3.36677	10.0639	4.89625	4.26914	4.51142	5.27577	4.59763
CR43866	0	0.0971849	0.173664	0.196317	0.0790271	0.097492	0.0848876	0	0.101687	0.205663	0.0851654	0.08659	0.0476044	0.267233	0.202125	0.220577	0.340376	0	0.112272	0	0.116399	0.0695012	0.0654366	0.201971	0.0499308	0.0982718	0.0754597	0.153912	0.288239	0.150656	0.0827969	0.390997	0.338785	0.240207
CG9098	0.493685	0.997039	0.509045	0.319691	0.772148	1.33359	0.559851	0.663538	0.794841	1.48198	0.596355	1.43827	0.69769	0.571167	0.454226	1.03718	0.748282	0.170145	0.548485	0.544614	0.824541	0.679073	1.67832	1.18404	0.768375	0.984186	2.20266	0.802039	0.714904	0.721286	0.552803	0.352643	0.463421	0.64542
H2.0	0.348097	0	0	0	0.261332	0.214928	0	0.236392	0.112088	0	0.0312922	0	0.157421	0.036821	0.0891198	0.151962	0.0937979	0.191951	0	0.0945247	0	0	0.108195	0.0494734	0.110076	0.0541619	0.124767	0.0565517	0.122201	0.0332133	0.030422	0	0.0248958	0.132388
CG13996	0	0.213994	0	0	0.174012	0	0.093458	0.157406	0	0	0	0	0.104821	0	0	0	0	0	0.123607	0.188822	0	0	0	0	0	0	0	0	0	0	0	0	0	0
CG9107	2.41372	2.43735	3.04188	2.11009	2.35948	2.67792	2.68652	2.98804	2.0645	2.51756	2.40713	1.8614	3.24058	1.07712	1.64145	2.79892	2.47286	1.66374	3.15093	3.07236	2.15467	3.73512	2.46168	2.11726	2.47467	1.70176	1.89249	3.18606	2.93922	3.20264	2.40611	2.51436	1.53747	2.61769
CG9109	0.188449	0.386629	0.230296	0.260335	0.0785981	0.0969627	0.548774	0.28439	0.0505675	0.460229	0.310578	0.4306	0.0946919	0.0332228	0.0402055	0.0274225	0.141053	0	0.223325	0.0852878	0.0578836	0.207372	0.195244	0.267833	0.148979	0.537561	0.337725	0.153076	0.0661556	0.0299677	0.0274491	0.239307	0.044926	0.179177
mtm	8.35377	9.66061	8.79796	8.33275	10.7122	5.52635	8.36847	11.0994	4.38577	7.77203	9.5153	8.92755	11.6151	4.91218	6.70845	8.83398	12.024	9.29885	8.94671	10.1446	7.6978	12.39	11.4504	7.28223	6.7682	10.9393	14.7386	10.284	8.34249	9.43111	8.59315	8.12917	6.27147	9.37346
CG9117	1.78797	2.16167	1.2876	1.58787	1.91758	1.57709	1.80232	2.31278	1.23371	2.07933	1.6073	2.62637	2.79153	0.878095	1.38962	1.8956	1.66331	1.05636	2.27022	2.7744	0.823788	1.68644	0.661588	1.08907	1.51446	2.38456	2.28878	2.12668	1.97269	2.68082	2.56713	2.43269	1.91813	2.24644
CG31643	15.32	18.18	13.2113	9.01783	10.644	16.5961	10.0571	10.0294	14.6788	15.1966	10.1785	7.74807	18.8196	22.4123	15.1999	14.5107	16.1835	14.116	15.0866	16.7901	12.121	12.958	9.89477	12.594	12.9675	12.0411	9.46944	10.9888	19.8674	23.7862	25.9174	22.2802	24.1811	18.0674
ade2	9.00295	14.7767	10.3803	12.9239	11.9832	12.4065	22.9203	54.1685	14.2428	33.8409	17.7347	25.616	21.3603	19.3499	31.2837	23.6498	23.099	14.102	18.2071	18.424	15.8947	13.037	32.0382	20.1668	26.2826	107.476	88.4279	34.0853	39.4378	22.9193	29.0095	24.2074	23.7492	26.3872
mir-966	0	4.09294	0	0	3.32822	0	0.893759	0	0	2.16537	1.79337	0.911683	3.00729	0.703408	0.851248	1.7418	4.7783	0	1.18208	1.80575	1.22554	2.92704	1.37793	0	1.05142	2.06936	1.58899	1.08033	1.86757	1.26898	1.74349	1.90002	3.32917	2.52908
slmo	9.45305	9.34501	7.01844	5.74525	6.01313	11.9016	9.22722	5.2002	11.0108	11.3926	9.39983	4.56133	3.74161	6.56375	5.13779	4.79532	4.00818	5.38741	7.04069	6.45322	7.49417	5.28831	4.02153	6.09837	7.34792	6.65575	3.89614	6.6277	4.11572	6.0718	6.3692	4.70278	8.97034	6.65311
CG34179	0	0	0	0	0	0	0	0	0	0	0	0	0	0	0	0	0	0	0	0	0	0	0	0	0	0	0	0	0	0	0	0	0	0
CG12393	9.98778	7.53927	6.73614	7.48462	6.75943	6.4965	9.07588	8.67388	4.85448	6.69889	8.92205	6.11452	8.66431	6.81068	5.50816	7.84283	7.75793	6.40815	9.26797	8.01705	5.55683	12.2349	9.209	5.73609	6.57992	10.5069	10.3194	10.9194	8.15919	11.1779	8.64647	10.8286	5.99763	7.04764
CG9135	1.96684	3.24788	2.28634	3.37982	3.48139	3.25814	2.57901	4.28937	3.05078	2.18692	3.04025	2.95957	2.78411	2.33419	2.8862	4.77479	2.73608	1.98397	2.5156	1.36779	2.74069	2.7978	2.85783	4.14192	2.48404	3.13492	3.29557	2.74719	3.65441	2.47166	2.41067	2.6271	2.65896	2.71388
CG13995	0.0684862	0.210764	0.156927	0.212875	0.257078	0.158572	0.184095	0.232545	1.26803	0.529647	0.815746	1.99523	0.361337	0.380327	0.32876	0.13454	0.41522	0.0944132	0.304353	0.697396	0.567976	0.22609	0.514429	0.352844	0.446673	0.133201	0.194333	0.25034	0.228402	0.49009	0.224451	0.130454	0.330623	0.569772
CG34180	4.00053	1.42055	9.02562	1.27536	1.92523	3.80011	2.27481	1.04491	2.97273	0.751544	0.138318	2.10948	2.55139	1.62757	0.590893	0.806046	2.21124	5.09078	2.18811	4.1782	1.98498	2.70907	1.43473	0.76539	0.85148	0	0.459581	0.999882	1.51243	2.05534	1.8826	0.879263	2.31094	2.19444
CG9140	2053.84	2144.8	1790.53	1619.27	1302.82	1317.75	2126.88	1627.96	1096.13	2175.69	1740.46	830.079	2446.08	1780.12	2385.2	2676.04	2252.92	1710.08	2543.41	2353.34	1789.77	2072.29	1363.73	788.995	1280.97	1927.38	1648.8	1383.59	2311.79	3275.05	3567.02	3328.73	2543.59	2815.03
CG13994	15.5866	14.108	16.6388	15.7692	15.1431	13.5865	16.1429	11.2075	7.38078	14.6291	14.2588	10.056	16.5853	13.4807	13.1451	21.0534	19.5174	12.134	14.0164	13.1954	13.8557	12.5107	13.2039	6.45028	9.35028	10.414	15.062	11.6928	16.0933	18.8959	21.4745	24.7996	19.0163	15.6915
Fbw5	17.4194	20.0249	14.1556	12.6967	11.8483	11.5683	12.9652	11.52	13.8189	13.6034	11.5623	9.85815	11.7172	11.784	9.75564	11.4509	11.9165	11.1693	15.6624	15.8819	11.3854	13.8749	12.0142	13.5662	16.4131	13.7882	12.3722	11.7846	11.2704	15.2435	15.0024	14.6131	14.7218	12.8792
CG9147	4.48	3.80332	3.46896	2.48091	3.38266	2.50381	2.49155	2.5353	2.11411	2.57806	3.08991	2.22383	7.91771	5.67844	4.20226	6.44048	6.86841	2.76855	3.77587	4.19493	2.20646	2.88991	2.7209	1.53691	2.90052	2.76421	2.88389	2.4156	6.34511	10.0599	9.51821	7.61402	7.89972	8.73949
CG9150	2.39395	4.70688	1.46277	1.65357	4.16028	1.64235	1.43001	1.80636	1.28476	0.433074	1.07602	1.27636	0.7017	0.140682	0	0.05806	0	2.93354	2.83699	1.80575	1.22554	0.585408	0.96455	1.03962	1.83998	0.310403	1.66844	0.270083	0.0933783	0	0.116233	0.0633339	0.0475596	0
CG13993	40.2545	24.537	39.0339	54.1997	44.5283	29.7175	38.8132	45.1212	39.7629	30.7119	38.1972	41.7245	21.5463	25.9185	31.2415	28.185	23.1436	26.8086	27.8276	21.9148	39.6023	46.2226	43.1164	49.0585	43.2768	38.4274	44.8416	35.3841	26.215	23.0079	24.9832	27.0409	21.6968	18.0276
CG9154	17.3488	33.0295	12.9363	12.9481	22.2593	17.4747	14.0299	22.132	14.321	9.45526	10.5073	13.3034	9.19763	8.55351	6.49306	9.43494	8.2535	12.5663	21.9534	16.5684	11.6512	11.8104	12.7191	13.8957	18.7131	9.83667	13.7891	12.0024	8.6194	10.2405	9.76533	10.432	7.41314	9.57562
Kr-h2	48.5436	42.6257	39.2227	41.1573	43.8175	39.3315	58.0434	51.0979	53.1208	45.7937	52.3307	53.6987	38.4596	35.6259	28.0176	29.0067	41.2837	43.5931	37.2225	42.6681	31.7276	41.7711	41.1219	40.9731	48.3192	52.4549	53.2751	54.9551	36.5599	38.2757	35.3729	33.2283	27.312	34.632
CR43801	4.66221	14.9999	2.33079	3.73266	7.15933	5.88809	2.42101	8.15511	3.41192	1.20761	2.00029	1.16215	2.71537	3.25036	2.44149	1.01765	1.04689	2.33716	4.70884	4.31594	4.29611	2.33198	2.41516	4.96963	3.43443	0.659465	2.84839	2.58211	1.85987	1.1121	3.33371	1.41283	1.89455	2.51865
CR9162	0.373551	0.431096	0.171188	0.0967588	0.467402	0.144153	0.564821	0.422797	1.20285	0.532167	0.37778	0.512132	0.492719	0.592702	0.239091	0.203843	0.293582	0	0.166006	0.507184	0.0860546	0.308296	0.145133	0.365001	0.44297	0.217959	0.195257	0.227576	0.295057	0.222762	0.285657	0.222359	0.267163	0.532759
CR44773	0	0.578061	0	0.778468	0	0.579888	0	0	0.60484	0	0.337712	0.257521	1.41577	1.39083	0	0.656003	1.68714	0	0.333899	0	0	0	0.58383	0.533927	0	0	0.112209	0	0.923171	2.32989	1.31328	0.715591	0.940384	1.25017
Kr-h1	6.71653	4.22793	5.77625	5.94224	4.82956	6.02532	8.45568	7.18239	9.28645	8.32582	8.73329	7.81804	6.13076	5.42072	4.75951	2.07532	4.28953	8.77822	5.52388	7.25396	4.74231	5.44724	4.55254	7.92649	6.02524	7.31197	4.51384	6.95263	5.58079	5.42017	6.50836	2.90768	3.57934	3.898
CG45075	0	0	0	0	0	0	0	0	0	0	0	0	0	0	0	0	0	0	0	0	0	0	0	0	0	0	0	0	0	0	0	0	0	0
CG9175	3.28525	4.62671	3.52143	5.53844	5.92209	5.50084	7.52125	6.05019	5.19965	5.03151	7.43324	7.55758	5.83367	5.0359	6.77148	5.44501	7.57705	5.98742	4.45413	5.59452	3.74561	7.04645	5.4517	4.57024	6.36087	7.01769	6.85223	7.14641	4.78912	5.52536	4.50137	5.72748	4.34079	8.47082
stai	2.13595	6.4794	1.78989	3.5725	3.5889	5.55787	3.44493	3.38455	9.8009	3.42793	9.1754	12.9266	4.43876	5.47089	3.84745	6.18082	7.78364	6.05738	3.79687	4.93009	4.61127	2.11539	4.42594	5.03063	6.68199	1.70918	2.31497	3.94099	4.20978	3.23167	3.00008	1.51119	3.43716	6.71636
CG31642	0.0593372	0.365216	0.0543852	0.430353	0.14849	0	0.0398754	0.134319	0.286601	0.144913	0.186694	0.406751	0.0894475	0.0941484	0.0759575	0.0777111	0.133241	0.327202	0	0.241693	0.109356	0.130591	0.338122	0.0843331	0.0938187	0.0461626	0.248127	0.168698	0.0624916	0.0566159	0.0777866	0	0.0424378	0.141045
Arpc4	40.4651	36.2587	40.8118	55.3959	35.9911	19.5663	51.9836	37.1548	19.7542	35.1903	41.6353	29.2981	32.5817	28.1916	34.949	37.3166	38.6081	36.7413	33.9433	42.8054	38.9349	51.8604	50.1744	27.4275	27.943	52.3414	53.8795	41.3842	33.8877	39.0745	44.2411	37.069	24.6402	32.1392
WDR79	3.02021	2.89164	2.46058	2.50338	2.09944	1.96839	3.74352	3.64626	1.62086	2.89574	3.07702	2.48439	3.08578	2.76875	2.9211	3.60383	4.31024	2.96076	3.10193	3.00714	2.0409	3.32348	2.36422	2.21778	2.81211	2.87177	3.06715	2.97123	3.69911	3.20188	3.43136	3.48373	1.75204	4.24361
tectonic	0	0	0	0	0	0	0	0	0	0	0	0	0	0	0	0	0	0	0	0	0	0	0	0	0	0	0	0	0	0	0	0	0	0
CG42730	0	0	0	0	0	0	0	0	0	0	0	0	0	0	0	0	0	0	0	0	0	0	0	0	0	0	0	0	0	0	0	0	0	0
CG9222	0	0.276035	0	0.185867	0	0	0	0	0	0	0.040316	0.122971	0	0	0	0.0391568	0	0	0	0	0	0	0.046465	0.03187	0	0	0	0.0364298	0	0	0	0	0	0
CR45719	0	0	0	0	0	0.42831	0	0	0	0	0	0	0	0	0	0	0	0	0	0	0	0	0	0	0	0	0	0	0	0	0	0	0	0
CR44824	0	0	0	0.270619	0	0	0	0	0	0	0	0	0	0	0	0	0	0	0	0	0	0	0	0	0	0	0	0	0	0	0	0	0	0.12417
CG13991	0	0	0	0.0212976	0	0	0.0138137	0	0.0165474	0	0.00923924	0	0	0	0	0	0	0	0	0	0	0	0	0	0	0	0.00613973	0.00834863	0	0	0	0	0	0
Muc26B	0	0	0	0	0	0	0	0	0	0	0	0.18998	0	0	0	0	0	0	0	0	0	0	0	0	0	0	0	0	0	0	0	0	0	0
CG31639	0	0	0	0	0.228717	0	0	0	0	0	0	0	0	0	0	0.0797981	0	0	0.162466	0	0	0	0	0	0	0	0	0	0	0	0	0	0	0
CG13989	0	0.208237	0	0	0	0	0	0	0	0	0	0	0	0	0	0	0	0	0	0	0	0	0	0	0	0	0	0	0	0	0	0	0	0
CG34380	0.588414	0.711395	0.365959	1.58946	1.4199	0.940711	0.437789	1.04655	2.30072	0.940909	1.95525	2.49214	2.07495	3.65667	1.3316	0.807315	1.6516	1.21676	1.25143	1.68342	1.97519	1.11	1.05597	0.910953	1.32076	1.27521	1.53156	0.870584	1.13611	0.912322	0.762184	0.660485	0.924329	1.28877
Ugt37b1	5.31988	0.818587	0.304744	0.275596	6.32362	6.67204	0.178752	1.27951	0.374723	1.19095	0.298895	2.0057	6.56591	0.91443	1.19175	6.93817	1.10498	3.30023	0.118208	0.722299	1.22554	0.146352	0.310034	0.165395	0.210283	1.24161	3.8533	0.513158	3.57172	0.475866	0.929863	0.570005	2.28286	0.790336
CR44823	0	0	0	0	0	0	0	0	0	0	0	0	0	0	0	0	0	0	0	0	0	0	0	0	0	0	0	0	0	0	0	0	0	0
Ddr	0.113975	0.280603	0.167141	0.283414	0.28522	0.316676	0.32169	0.206401	0.550505	0.148453	0.614748	0.656283	0.30926	0.192897	0.320979	0.149268	0.419725	0.125698	0.364684	0.123798	0.357086	0.37626	0.259787	0.226782	0.24328	0.0532015	0.142981	0.333294	0.184052	0.184872	0.189256	0.151971	0.154878	0.422634
CG9486	2.28054	2.03161	0.660069	3.35775	4.05498	2.2233	1.8552	2.03778	0.869615	2.54049	1.99614	3.94937	1.89983	0.253927	0.845067	1.51956	0.592951	3.64029	0.853452	4.56307	2.21207	4.75492	0.870496	0.895601	1.13867	10.8319	10.5044	1.65748	2.82314	0.801667	0.524495	0.285791	0.901364	0.34237
CG13983	0.131936	0	0	0	0	0.203655	0	0	0	0.214809	0	0	0	0	0	0	0	0.363765	0	0	0	0	0	0	0	0	0.0394077	0	0	0	0	0	0	0
CR42735	0	0	0	0	0	0	0	0	0	0	0	0	0	0	0	0	0	0	0	0	0	0	0	0	0	0	0	0	0	0	0	0	0	0
CG43922	0	0	0	0	0	0	0	0	0	0	0	0	0	0	0.19749	0	0	0	0	0	0	0	0	0	0	0	0	0	0	0	0	0	0	0
CG13984	0	0	0	0	0	0	0	0	0	0	0	0	0	0	0	0	0	0	0	0	0	0	0	0	0	0	0	0.0715288	0	0	0	0	0	0
PDZ-GEF	3.9405	4.535	5.02944	4.62261	4.44153	5.80606	4.54112	4.18354	5.4136	4.21525	4.6621	5.33539	5.64554	5.2619	5.90926	4.27214	4.62163	4.71395	5.0364	4.06789	5.19154	4.40786	4.31878	4.74418	4.0742	4.81374	4.59607	4.94678	4.81307	5.25904	4.64629	5.10218	5.45015	5.45739
Pez	9.11203	7.67628	13.5772	21.4135	13.8854	7.54339	15.0691	11.6096	10.9209	16.5554	16.8516	13.8184	8.59451	6.08465	35.9215	9.98911	7.23564	9.40364	9.90857	9.26151	21.7653	12.7718	25.632	14.9401	14.5379	24.2369	20.4049	11.578	8.27402	7.85629	10.5327	10.3268	7.58182	7.59891
Cpr	64.3934	66.6063	64.4108	55.9627	67.3233	69.5941	65.1773	55.3375	41.921	54.8148	53.1897	52.7511	228.434	163.971	152.923	146.446	183.77	66.5901	63.23	63.9864	104.868	53.0018	55.4587	47.0751	47.3779	50.7692	52.988	68.3275	174.516	178.329	191.54	154.146	133.473	194.352
CG9497	17.9366	14.6529	25.1079	9.66372	12.3232	16.008	11.8345	10.9258	8.71597	7.75212	5.71674	8.36087	37.4114	21.8017	14.7783	14.1514	14.646	23.0185	27.6523	19.0398	14.1241	28.2788	10.9473	7.25376	9.97749	4.97275	10.0136	19.2057	38.7649	30.5252	26.0502	19.7231	25.8431	27.2246
CG9498	35.7669	20.9324	33.0622	23.1216	23.2371	21.3524	26.8606	19.9816	19.6258	15.4293	17.5191	20.0125	52.3613	25.9095	24.409	25.7899	29.8261	19.5965	16.2345	15.5647	15.9862	44.3203	19.7952	11.6766	27.4601	25.5068	39.3314	29.7673	62.9683	41.3821	52.0307	26.0581	19.7046	44.144
ppk7	0	0	0	0.0696191	0	0	0	0	0	0	0	0	0	0	0	0	0	0	0.0597218	0	0	0	0	0	0	0	0	0	0	0	0	0	0	0
ppk14	0	0	0	0	0	0	0	0.188163	0	0	0	0	0	0	0	0.0362875	0	0.229183	0	0	0.076596	0.09147	0	0.0295347	0.0657135	0	0.024828	0	0	0.079311	0.0363228	0.0395837	0	0.0395168
CG9500	0.100791	0	0	0	0.252226	0	0	0	0.0811371	0	0.0906057	0	0	0	0	0	0	0	0	0	0	0	0	0	0	0	0.030105	0	0	0.048084	0.0440429	0	0	0
CR44777	0.071868	0	0	0	0	0	0	0	0	0	0	0	0	0	0	0	0	0	0	0	0	0	0	0	0	0	0.0429323	0.0875673	0.0252295	0	0	0	0	0
CR44778	0	0	0	0	0	0	0	0	0	0	0	0	0	0	0	0	0	0	0	0	0	0	0	0	0	0	0.0373224	0	0	0	0	0	0	0
CG9505	4.15926	8.01925	7.34871	4.82859	5.45503	3.71289	4.61356	5.04789	2.09769	3.54909	2.90558	5.29005	4.45688	6.25481	6.22233	4.44088	7.96677	3.73044	9.53139	8.64085	3.41706	8.16123	3.03723	4.45132	3.16928	5.06809	5.83742	7.42875	2.84988	5.57025	4.92693	4.60563	1.46943	6.43222
slam	0.421572	0.908161	0.695501	0.262074	0.457156	0.390442	0.736586	0.381719	0.24887	0.5491	0.505297	0.905483	0.296565	0.237829	0.287816	0.711613	0.265058	0.154978	0.499592	0.381589	0.414366	0.618539	0.203828	0.359496	0.255512	0.655941	0.444913	0.616395	0.443983	0.268159	0.147373	0.254289	0.331658	0.307304
CG42368	3.30593	3.89998	4.17471	7.00276	4.36631	4.13911	3.13497	3.49231	4.4355	3.3192	3.08744	4.78417	2.49175	5.03171	4.74915	2.87038	3.01886	3.13958	4.11364	3.59086	4.46795	4.48673	3.00651	6.10812	3.23786	4.28652	4.34475	3.14788	3.72668	2.50593	2.92132	3.48095	3.52032	3.31791
CG9507	0.268587	0.413284	0.344641	0.16697	0.268854	0.248754	0.0360989	0.303996	0.259458	0.349837	0.555328	0.552343	0.404881	0.369338	0.378201	0.187603	0.627235	0	0.57293	0.437605	0.593992	0.413781	0.417409	0.038173	0.403434	0.0417906	0.112314	0.196356	0.452585	0.896944	0.234732	0.639513	0.249721	0.995956
CG42370	6.06935	8.73934	9.69668	10.0961	11.4261	11.2595	4.71482	7.81483	4.30316	7.79658	5.28086	4.31317	24.5098	43.291	54.1005	21.9502	22.256	5.37333	10.3435	5.51892	8.4148	7.41409	3.98061	7.47857	3.65365	6.41122	5.03938	7.93795	19.8015	24.2797	27.1055	23.6524	24.1332	23.8771
CG42369	66.2606	92.1438	111.972	89.7629	73.3734	54.5916	52.4317	57.1843	23.3364	60.0762	38.4939	39.9705	57.2461	65.9713	89.2202	70.5074	74.1706	70.5639	135.674	73.5458	75.4823	105.725	46.9822	36.1977	34.769	52.322	57.2463	80.2976	66.323	84.9542	53.8186	91.466	57.1339	71.8601
CG13982	0.350231	0.134728	0.642004	0.362873	0.273889	0.810921	0.32362	0.743254	0.881058	0.427667	0.31484	0.54018	0.362968	0.370467	0.44833	0.172005	0.412881	0.362114	0.622571	0.713281	0.806823	0.578099	0.430896	0.38888	0.674888	0.476821	0.575355	0.444518	0.353481	0.584795	0.172172	0.416954	0.485313	0.4995
Tig	10.2221	7.12881	22.2892	20.0547	12.6046	5.21717	18.6803	21.0307	9.99409	13.9452	15.8068	18.3316	8.72361	8.65017	12.4627	6.44898	11.1362	10.4553	11.2835	8.12587	15.2534	21.2634	31.7464	9.30857	11.9783	22.7159	31.0986	23.7718	6.92813	11.8062	8.94801	12.3972	6.41465	9.43701
Fic	13.5736	13.5528	15.3713	13.001	15.3987	13.0369	17.6352	18.026	12.3838	15.0769	16.9201	15.1768	16.0963	15.5384	16.835	13.958	16.1744	11.3105	14.0481	16.2998	12.8969	16.4635	14.8443	13.1611	14.8084	19.8056	17.4965	16.6612	14.9941	17.0379	18.0049	20.3682	15.8992	15.8311
CG9527	41.8491	20.8262	22.8593	23.5108	43.7197	30.8111	15.8699	27.4105	14.6459	15.9223	17.4201	22.9057	25.8516	20.328	20.0249	24.248	21.6081	30.4516	18.9547	26.9377	22.3162	23.5118	19.8898	14.3558	18.7487	19.7469	27.111	22.0862	25.9424	25.6555	22.6745	19.5654	23.9414	26.845
retm	16.1678	17.3712	19.2325	17.205	17.4907	27.8045	14.942	13.9102	15.5326	18.1768	16.3894	14.427	27.2476	38.7853	30.9044	26.5804	26.6281	25.3493	26.961	19.4464	24.8688	22.3337	14.1102	15.2894	14.339	16.0328	17.1869	18.3024	27.1822	42.3701	34.2177	34.1772	46.4651	35.9332
frj	26.9505	24.0129	28.5124	20.2644	23.3802	27.9715	22.9752	29.1671	24.96	24.8648	24.7348	24.1046	33.8166	29.5394	26.6466	30.3208	26.7198	30.5718	31.7101	29.8309	27.3886	24.2338	23.7738	19.8631	26.4599	21.3261	23.6588	25.7698	31.3207	29.8288	31.427	28.2592	33.8505	28.0406
CG16947	1.84968	3.16239	1.83659	2.82143	2.57154	2.37929	1.4847	1.57014	2.68848	2.46777	2.37868	3.38116	2.78828	2.8533	3.55165	2.24299	3.29967	1.27495	2.46599	1.81377	2.84072	3.16619	2.36885	1.78908	2.07155	1.67883	1.50397	3.04671	1.96604	3.06397	3.32286	2.5446	1.87409	3.41964
CG9531	3.46531	2.08085	2.09158	1.40113	3.27838	2.47882	2.10154	2.29589	2.24529	2.13294	2.65927	3.59213	2.80299	2.50329	1.56881	3.9111	3.07457	0.932132	3.75606	2.86888	2.02495	2.13916	2.1454	2.25232	3.00679	1.11782	2.65073	2.50591	2.34401	2.98381	2.62224	2.49542	2.56905	3.29482
mmy	22.6144	24.7394	21.1619	23.7037	29.2194	20.8305	30.9257	31.0847	21.1752	30.1248	31.6311	30.2089	35.4805	22.8058	23.5503	34.4496	46.6611	25.7252	27.8772	32.7083	21.0329	29.9898	33.124	25.3604	28.8589	44.824	48.8256	32.5	29.7753	25.8273	26.3518	23.948	23.7139	35.1095
CG9536	16.3086	16.0275	16.8569	17.8223	13.7032	12.1275	19.4393	18.2565	10.2057	16.0866	15.9447	14.5658	16.554	12.6863	15.7336	16.9154	17.8025	11.9797	17.0873	18.5869	13.6568	19.8456	17.4516	12.689	14.7985	23.7545	20.0536	20.0403	15.8801	19.3656	16.3336	18.9337	13.2176	16.44
Sec61alpha	96.6223	84.838	89.5554	87.6596	117.904	116.58	113.128	138.162	85.4854	93.3083	101.962	130.716	113.809	93.0313	115.647	101.404	122.829	83.8033	81.8185	93.9057	61.1271	99.3839	97.2051	75.5981	99.49	120.22	126.906	145.356	94.6771	141.762	88.6723	109.864	75.19	124.904
CR45463	0.428546	0.659417	1.57113	0.444015	0.536214	0.661501	0.575978	0.485042	0.689966	1.0466	0.770484	0.587529	0.323005	0	0.548582	0.374165	0.192459	0	0.761785	0.581852	0.78979	0.471579	0.887998	0.456804	0.67758	0	0	0	0	0.204446	0.374528	0.204076	0.306495	0.407462
DLP	7.75026	9.43458	9.90404	9.41378	10.9128	10.6201	7.84642	11.0852	9.92052	8.00596	8.19498	9.27994	10.1579	10.7666	10.5039	9.52294	9.39678	11.2143	10.6114	10.1382	11.2439	8.6621	10.577	12.1295	9.21451	11.1301	9.5256	9.45149	9.30598	10.9088	10.611	10.5036	11.0063	10.1491
KFase	5.68775	6.40066	7.6251	4.3978	4.35501	5.1105	5.4196	3.07466	3.21191	4.49199	3.54858	2.90963	4.79886	6.15107	5.48783	6.67073	5.48996	2.8087	6.26251	6.10881	5.31935	5.23131	2.4187	2.83534	3.65759	3.43425	2.73847	5.75794	6.40734	6.15589	7.79007	6.99368	6.76966	6.45722
epsilonCOP	35.3929	30.7748	34.8385	38.0808	35.6376	19.881	36.3804	40.7699	19.8092	31.3694	33.0402	28.1376	25.3347	20.4911	25.4011	27.8389	34.5173	30.3143	28.4791	33.2683	25.6664	46.2062	40.6289	27.9787	29.3459	35.5995	43.5682	39.1266	25.1804	32.7206	29.0098	31.2652	21.3063	26.1845
CG9548	23.4769	17.6937	19.7611	18.8638	20.6825	12.5726	19.6405	15.1839	14.8493	17.9416	20.6739	12.8089	14.0838	15.3308	16.0997	16.2099	16.2455	15.1915	17.6725	17.8892	13.4657	20.2984	17.0016	11.9166	16.6659	17.7052	18.3178	14.4973	17.1561	18.2859	17.4819	18.1387	16.191	15.0331
CG31638	3.96259	5.70934	3.6649	4.03097	4.23696	3.948	3.70387	3.87339	4.84287	4.1349	4.80893	5.85243	4.53433	4.95364	4.10412	4.07306	4.74018	4.17152	4.5145	4.59758	4.58088	4.083	3.54563	4.09588	4.21483	4.23181	4.25013	4.65263	4.9573	4.74325	4.94279	4.73466	4.93379	4.91505
CG9547	5.70106	6.54841	6.32921	6.48922	6.32963	4.83387	6.9609	4.54412	1.74526	6.01375	5.37761	4.56854	14.1015	7.43191	16.3433	16.2999	15.0375	7.97002	10.4911	6.97738	5.25339	5.9201	8.77676	3.90867	4.95136	15.3048	10.1451	12.3601	19.4782	15.5144	14.7368	13.8803	17.3433	15.0784
CG9550	0	0	0.163407	0	0.111539	0.275201	0.0599053	0	0.287043	0.0725682	0.0801351	0.0611067	0.067189	0.0471467	0	0.0389154	0.0800679	0.24578	0	0.121032	0.082143	0	0	0.0950209	0.0704725	0	0.0798779	0	0.15647	0	0.155813	0.0424503	0.12751	0.0423786
CG31637	14.8965	14.9257	16.2331	20.549	22.8653	26.3363	17.7223	15.8801	21.3342	15.0879	20.9043	18.3449	20.3667	21.5287	22.6721	20.6246	25.9042	34.1468	15.5493	24.4587	20.8295	18.1554	19.8304	22.1871	20.8143	15.059	17.0733	18.7485	19.9753	19.4606	18.2982	15.6517	22.3144	25.8979
CR44775	0	0.362982	0.108105	0	0.737909	4.36955	1.66452	0.400494	1.70909	0.672125	0.265075	1.05108	0.266701	0	0.377465	1.0813	0.688616	5.52842	0.419331	3.363	0.108687	0	0.549907	0.586721	3.03046	0	0.10569	1.0539	0.165625	0.112539	0	0	0.506139	2.35506
eya	0.438999	1.2545	0.546062	0.61729	0.510057	0.629233	0.463592	0.319418	0.530096	0.357374	0.26779	0.30093	0.590862	0.547285	0.541892	0.903471	0.549213	0.432279	0.780365	0.46832	0.346737	0.828138	0.194926	0.323105	0.309869	0.365923	0.318444	0.471218	0.44032	0.718055	0.465876	0.612227	0.437317	0.387586
CR44776	0	0	0	0	0	0	0	0	0	0	0	0	0	0.104968	0	0	0	0	0.1764	0	0	0	0	0	0	0	0	0	0	0	0	0	0.0709724	0
Osm6	0.0787126	0.121117	0	0.0815538	0	0.1215	0.158688	0.0890894	0	0.0640773	0.0707587	0.16187	0.0593274	0.0416302	0.05038	0.137448	0.141399	0	0.13992	0	0	0	0.122326	0.0559352	0.0622267	0.122472	0.0235106	0	0.248691	0.150205	0.0343954	0.11245	0.140738	0.1871
CoVb	822.015	1024.54	774.217	818.633	589.835	497.841	797.943	635.046	495.881	934.571	520.433	271.351	1114.37	863.298	716.306	1219.85	1177.35	674.804	1218.57	1028.15	656.988	975.295	474.421	263.254	487.104	530.718	609.431	467.108	1039	1766.49	1813.27	1556.04	1112.75	1231.82
CG9596	3.11121	3.64748	3.12314	2.86535	2.34808	2.97294	2.2899	3.29779	2.42504	2.65334	2.37508	2.91132	2.71721	2.3507	2.33902	5.17411	2.86102	2.72319	3.24807	2.07858	2.32083	3.641	2.635	3.08825	2.55719	2.15149	3.20087	3.2493	2.94721	3.08633	2.22271	3.01018	2.63131	2.41817
CG11043	2.86139	1.92627	2.45868	2.4088	2.90898	2.20841	5.28796	2.02413	4.75085	6.11457	5.94833	2.45182	2.56107	2.93213	4.23519	3.04479	3.53388	2.95847	3.81481	4.37064	4.61423	2.16474	3.33514	2.28755	4.66556	5.28693	3.52549	3.34118	3.82966	2.47421	3.67292	6.13174	3.96502	3.48579
Ent2	30.4672	24.7841	26.3238	22.7202	23.6743	23.0652	21.5503	19.2736	16.2077	21.6033	18.2299	17.7589	36.4203	31.3808	28.8161	36.7246	28.1281	27.8225	25.7857	29.7733	20.8326	20.5003	19.9548	14.8073	21.3438	19.5131	21.6203	21.8913	31.1502	34.7173	34.6191	33.6379	41.3248	30.7211
CG13766	5.47794	5.84875	4.81585	4.69112	6.01492	5.0044	3.98176	3.92252	5.53473	5.41499	4.24604	4.09993	4.38163	5.43968	4.6868	5.12443	4.21737	5.08586	4.81912	3.33933	5.66588	5.22837	4.77782	5.28304	4.37481	4.65305	5.07556	3.67783	5.16084	4.32004	5.61792	4.76473	7.156	5.07556
CG11319	0.372695	0.816103	0.367868	0.742592	1.14789	1.81438	0.953661	1.21681	2.86175	0.898526	2.55786	3.73393	1.93395	1.91808	1.55971	1.10136	2.45915	1.77849	1.01924	1.16774	1.46618	0.252381	1.49256	1.30895	1.38252	0.44607	0.637948	1.12945	0.946045	1.14887	1.06484	0.450524	1.16872	4.08876
CG11050	247.292	205.804	212.499	185.085	170.904	192.716	231.978	153.396	205.966	253.52	229.634	147.75	139.937	190.282	195.139	168.255	151.679	153.21	198.712	179.767	177.599	177.357	137.176	163.885	212.975	256.651	148.531	170.724	159.387	222.959	246.079	266.911	303.178	194.436
CG11320	0.0871948	0.805016	0.159836	0.180684	0.76371	0.269187	0.175788	0.394759	0.421155	0.496876	0.274343	0.239085	0.197162	0.0922328	0.055809	0.114195	0.195795	0	0.232497	0.47355	0.160696	0.479752	0.406525	0.588647	0.275729	0.339175	0.494838	0.814523	0.0612201	0.0831959	0.0381019	0	0	0.414525
CR44913	0.630559	0	0.288968	0	0	0	1.27123	1.78422	0.253802	0.256658	0.425131	1.94509	0.475266	0.500244	0	0	0.141591	0	0.560442	0.428066	0	0.693876	0	1.34427	0.124623	1.47167	0.376681	0.512201	0	0.15041	0.137769	0.150138	0	0
CG34345	0	0	0	0	0.0814731	0	0.218787	0.294792	0.104834	0.0530071	0.263404	0.848066	0	0	0.0416762	0	0	0	0	0.0884075	0.120002	0.0716524	0.0674619	0.0925433	0.205905	0.253284	0.0583464	0.0793378	0.0228585	0	0	0.0310076	0.0232847	0.0309552
Oatp26F	0	0.0736322	0.219295	0.0991597	0.059875	0.0738649	0.0321576	0.0541611	0.0385217	0.0779103	0.15056	0.164013	0	0	0.030628	0.0835603	0.0644715	0.131936	0	0	0.044095	0.0526577	0.0495781	0.0510079	0.0189151	0	0.0571721	0.0194353	0.0503965	0.022829	0	0.0227876	0.0342241	0.0454983
CG31635	16.083	15.893	20.8289	18.1509	17.7794	20.0182	14.1027	12.8056	17.5107	15.6775	16.6998	15.8449	23.6849	26.6058	25.1119	20.1072	20.3901	22.8759	19.3009	18.9624	21.692	17.2026	17.4948	24.466	15.8643	16.3641	15.5379	13.3557	20.2478	26.4075	29.7275	26.8174	34.5554	21.9139
Tango1	28.5621	24.1246	26.5411	30.3618	27.8788	28.3234	22.7505	25.6101	26.8746	27.479	28.0546	27.1564	38.4706	44.5339	42.8777	34.9451	37.3821	29.2499	24.9245	28.8414	26.4788	23.7563	28.375	26.7287	27.2132	30.5315	29.7742	23.4922	34.7684	39.6396	40.9547	39.8975	43.3312	37.6435
CG31633	10.9173	10.6678	9.20278	15.1919	11.9651	10.7016	9.74641	10.1919	11.6753	10.12	11.0319	8.68548	6.00629	8.59785	8.16072	7.51422	6.65655	9.88705	9.9158	7.4655	12.6301	11.4874	10.8156	10.2498	11.4972	11.2831	11.5678	7.44402	6.93777	8.97198	9.12332	7.28601	9.91677	6.51603
CG31636	1.69832	0.11362	0.406067	8.87464	8.13046	1.70969	1.836	0.167149	2.25879	0.540997	0.165947	4.70736	0.0556549	0.0390533	0.189046	0.290115	0.066323	2.23947	1.1157	1.40357	2.65363	1.13757	0.994535	1.60042	0.350249	1.60847	1.21304	0.479841	0.673968	0.105681	0.0322663	0	0.0528103	0.105311
CG11070	18.4258	13.3886	14.7927	15.9445	15.1566	12.6409	15.5239	11.393	12.0312	16.4165	14.9842	12.6541	14.8395	14.1306	16.904	13.4362	13.3473	16.7461	12.7376	14.3619	14.495	14.0806	14.353	12.3422	13.5821	17.2017	16.6942	12.0985	11.4636	16.3436	13.7176	15.8428	14.3861	12.4744
CG13771	0.0808578	0	0.14822	0	0	0.249623	0.326025	0.0915174	0	0.0658236	0.109031	0	0	0	0.051753	0	0.0363131	0	0	0.219567	0	0	0	0.0574596	0.127845	0.12581	0.0724539	0.0656806	0.0567709	0.115724	0	0	0.0578293	0
CG34310	1.3163	1.51907	1.60086	1.18022	0.981866	1.17221	1.13973	1.17467	1.05963	1.73097	1.16053	0.798197	1.06844	1.39235	1.00451	1.43658	1.14819	1.04689	1.10243	1.30602	1.23626	1.03064	0.839237	0.9264	1.28075	1.08312	0.846812	1.0281	1.63509	1.89597	2.12377	1.43447	2.08197	1.81713
cup	0	0	0	0	0	0	0	0	0	0	0	0	0	0	0	0	0	0	0	0	0	0	0	0	0	0	0	0	0	0	0	0	0	0
Galt	38.5172	45.7104	52.5968	33.0408	25.658	45.7345	32.8005	35.8291	17.3235	34.0849	24.9525	28.9152	54.5364	34.0209	50.4037	38.7011	64.9901	35.2558	57.4496	54.9427	27.2302	59.03	29.768	20.0575	26.6591	39.246	31.3001	65.8999	54.7981	53.601	63.4401	50.0508	34.0997	69.0187
Spn27A	8.36257	11.152	12.3564	10.7649	12.6831	8.8403	26.498	43.8833	14.0351	15.8433	28.1338	20.6369	36.4431	26.3764	16.4791	24.5592	38.6942	14.8122	16.2618	20.5751	12.8432	17.568	34.4989	26.3098	21.3558	33.712	44.3701	29.477	29.624	20.673	22.2797	20.0804	13.6836	24.9377
cort	0.139828	0.537893	0.256317	0.144875	0.0874789	0.215837	0.375865	0.316523	0.168844	0.170744	0.188547	0.0479254	0.158087	0.369767	0.536981	1.55657	0.376779	0	0.434977	0.189849	0.128848	0.461606	0.181087	0.248413	0.110542	0.163173	0.08353	0.227163	0.687219	0.366891	0.366608	0.332933	0.250011	0.764453
CG11329	0.82902	1.64011	0.542738	0.736238	0.444558	0.54843	0.795876	1.2064	0.190676	0.771288	0.692016	0.405918	1.51749	0.689008	0.530614	1.65444	1.2765	0	0.947358	1.12559	0.545658	0.390971	0.67486	0.420802	1.12352	1.10563	0.672108	1.10632	1.62146	1.469	1.13853	1.35354	0.931721	1.01344
Nhe3	33.9524	28.1552	41.3676	45.7893	39.2709	28.7934	30.1089	34.5453	46.7875	34.0735	38.3232	47.6805	21.1276	25.5243	29.8479	21.4009	19.8817	45.8949	24.3945	28.1904	33.5344	45.4437	34.8607	54.6028	48.7703	38.6126	43.343	22.9037	20.9477	22.7446	25.9192	25.0633	33.2069	20.9736
CG11327	0	0	0	0.0663076	0	0	0.0860144	0.0724344	0	0	0.0862959	0.263218	0.0482363	0.0338476	0	0.0558764	0	0	0.113762	0	0	0	0	0.0454783	0.151781	0	0.0191153	0.155955	0	0	0	0	0.0228854	0
Tsp	5.46595	4.93282	9.59681	6.33233	6.14663	4.7348	9.90368	7.17847	7.8534	5.78266	6.67589	9.86515	4.46747	5.95254	7.366	6.02079	7.28139	8.83876	7.70744	7.45263	7.54449	7.02997	6.65468	6.3836	8.00414	6.83605	6.33759	13.7602	5.89417	6.21652	5.9057	7.3255	5.22056	6.49081
AkhR	37.0177	30.6623	59.7912	33.6067	32.2133	37.6632	23.0192	21.1547	22.9497	27.5595	17.9461	24.129	26.0921	38.2911	31.8857	22.113	24.5776	33.1855	31.5439	29.6229	25.7675	34.7726	16.5579	13.4371	11.0245	16.0118	16.8241	25.107	18.6375	25.9002	23.5487	25.4203	24.9276	28.8002
Aatf	11.1427	10.6637	12.2678	8.79948	11.3918	8.80966	10.5472	10.9199	7.82137	8.18594	8.21495	11.4108	6.60614	3.91686	4.3922	7.23722	4.36339	10.1158	6.88425	11.1621	6.44864	14.4298	10.3478	14.702	11.978	8.14012	9.61931	9.74107	4.24561	4.76481	4.57219	3.81788	3.62017	4.29594
homer	11.3594	11.3237	9.06242	13.138	11.7107	10.1361	9.40896	9.86696	14.066	8.60215	11.5855	12.9348	9.64273	12.375	11.1354	9.88498	8.77931	11.5497	11.0355	10.6578	13.5624	13.1645	9.83358	13.1678	11.3372	11.5677	10.934	11.1585	10.9034	10.0283	8.95459	11.7713	12.4158	9.75996
Liprin-alpha	8.72279	8.94802	9.19064	10.0805	8.97864	9.55171	8.90549	9.0922	9.48259	8.93686	11.6029	9.4035	8.69584	9.59152	10.999	7.51825	8.11938	9.35277	8.91245	8.7306	10.5454	7.65024	9.64561	11.4768	8.98819	11.2956	9.92613	9.00828	7.7274	9.16748	8.29928	8.84022	8.93122	7.3101
TTLL3B	0.0767037	0.118026	0	0.0397362	0.0479873	0.118399	0.180411	0.130224	0.0926206	0.0624419	0.086191	0.341768	0.0578132	0.0405678	0.0490942	0.0669701	0	0.105741	0.102262	0.0520716	0.0353403	0.0844059	0.0993369	0.0545076	0.0303193	0.17902	0.0343658	0.0467296	0.0134636	0.036593	0.0167588	0	0.0274292	0.0182325
TTLL3A	0.0376162	0.0578812	0	0	0	0	0.0505572	0	0.0302813	0.0306221	0.135261	0.154714	0	0.0198948	0.0481525	0	0.0168934	0.103713	0	0	0.0346624	0.0413934	0.0974315	0.0400966	0	0	0.0449422	0.0152778	0.0132053	0	0	0	0	0
CG11221	0.595116	0.457861	0.389607	0.528512	0.904196	1.11546	0.771286	0.914132	1.403	1.10735	2.00617	1.42781	2.1146	1.39389	0.952259	1.16909	2.02358	1.75802	0.566721	1.03887	1.33179	0.467767	2.79661	0.679668	1.22659	1.25667	2.7171	1.39844	1.13412	0.790896	0.798727	0.910919	1.06406	1.45501
CG31910	0	0	0	0	0.319951	0.197354	0	0.289418	0.720462	0	0.114934	0.262927	0	0.0676204	0	0.0558146	0	0.705021	0	0	0	0	0.33116	0.045428	0.0505377	0.0994663	0.0381884	0.155783	0.13465	0	0	0.0608845	0	0
snoRNA:Me28S-G2743	0	0	0	0	0	0	0	0	0	0	0	0	0	0	0	0	0	0	0	0	0	0	0	0	0.578945	0	0	0	0	0	0	0	0	0
CG44271	0	0	0	0	0.293072	0	0	0	0	0	0	0.16056	0	0	0	0	0	0	0	0	0	0	0	0	0	0	0	0	0	0	0	0	0	0
CG11322	0.262227	0.100874	0.300428	0.271692	0.492162	0.202386	0.96921	0.445195	1.16102	1.01398	1.06078	1.25828	0.098823	0.346722	0.587433	0.314807	0.294414	0.542247	0.174801	0.445043	0.362453	0.504977	0.475444	0.722087	0.544175	0.714016	0.724498	0.18638	0.41425	0.2502	0.286466	0.280966	0.351645	0.436319
CG11321	24.6847	19.1089	31.0081	28.7712	22.743	16.5989	26.2658	15.8476	24.8747	24.5531	24.7046	17.2668	35.7436	40.4565	30.2329	26.5846	28.9813	28.808	25.0458	22.179	24.7995	27.2796	20.3019	25.5832	23.3759	26.84	21.7654	16.9079	32.1062	49.2536	37.8684	65.465	43.0836	31.3866
CG17378	1.24455	0.76601	0.879957	0.994736	0.622891	1.31731	0.908042	0.724433	1.88924	1.07104	1.82203	2.48626	0.777236	1.18481	1.04693	0.527786	0.942188	0.9804	1.10616	0.724186	1.31065	0.665195	0.9947	1.06129	1.30716	0.691587	0.892159	0.996502	0.961188	0.763375	0.94783	0.745059	0.762942	0.92975
nrv1	517.02	473.942	488.077	510.777	421.471	452.087	607.072	409.471	643.404	514.911	555.902	456.097	385.597	509.785	368.707	372.18	361.428	411.168	400.869	436.946	406.96	366.549	360.104	519.758	526.44	511.313	408.869	357.543	374.94	412.281	483.73	494.197	516.843	409.06
nrv2	63.9504	56.6862	51.0044	48.5517	41.794	52.5604	59.7561	54.9465	91.1875	55.175	70.8983	68.6016	74.8922	103.338	64.5107	79.9163	75.8925	53.7366	72.0291	63.976	56.4784	51.6371	40.5031	54.2365	56.7478	42.8136	36.3525	51.0907	81.3529	90.6445	132.341	109.537	146.13	107.209
CR43610	0	0	0	0.703133	0	0.523769	0.456053	0	2.45838	0.552455	0.610061	0.2326	0.255752	0.538385	0.868722	0.296259	0.761936	2.80665	0	0.460704	0.93802	0.746781	0.878884	0.482256	0.26825	0	0.304052	0.689068	0.476476	0.647513	0.741368	0.161585	0.485359	0.483936
CG17376	0	0	0	0	0	0	0	0	0	0	0	0	0	0	0	0.0598486	0	0	0	0	0	0	0	0.0487113	0	0	0	0	0	0	0	0	0	0
CG17377	0	0	0	0.0913751	0	0	0	0.0998182	0.070995	0.0717939	0.03964	0	0	0	0	0	0	0	0	0	0.0812665	0	0.0456859	0	0	0	0	0	0	0	0.0385376	0	0	0
CG11236	23.0239	23.9702	35.2905	31.1638	24.8856	34.6322	18.6327	16.19	16.2472	19.1418	13.123	15.7827	26.8058	31.1941	36.9979	25.8763	32.076	26.4726	40.5791	24.6093	21.0354	33.2062	11.521	15.3171	14.9099	18.5979	13.1102	31.953	34.4974	32.9053	36.5189	33.1723	38.8543	34.5135
CG17375	0	0	0	0.0936595	0	0	0.0607477	0.102314	0.0727699	0	0.040631	0	0	0.0478097	0	0.0394627	0	0	0	0	0.0832982	0	0.046828	0	0.0714635	0	0	0.0734288	0	0	0.118503	0	0	0.0429745
CR44081	0	0	0	0	0	0	0	0	0	0	0	0	0	0	0	0	0	0	0	0	0	0	0	0.0872874	0	0	0	0	0	0	0	0	0	0
sens-2	0.988953	0.427987	0.764791	0.768488	0.734716	0.620158	0.851506	0.419748	0.87075	0.528329	0.513965	0.953323	0.83857	0.75188	0.751663	0.566644	0.624568	0.511253	0.93392	0.881171	0.882818	0.748178	0.928556	0.560024	0.684095	0.913634	0.636933	0.866084	0.748597	1.16475	0.796772	0.662265	0.663091	0.808068
Rca1	1.56563	2.29436	1.84496	1.31316	1.39927	1.49605	1.70344	1.60327	1.14031	1.33522	1.40742	1.78871	1.23624	0.946337	0.715772	2.70136	1.60714	1.43889	2.25296	1.82204	1.99229	1.88692	2.04692	0.980127	1.65029	0.986011	1.02435	1.57456	2.06762	1.81393	1.53117	1.1716	1.17306	1.94936
l(2)k09022	11.1202	9.79345	10.2086	9.00242	9.08216	7.97543	7.76129	6.9811	8.53449	7.75729	7.39293	8.23558	6.33333	4.68996	5.90455	7.01645	5.54005	9.31631	8.40589	9.92799	7.64407	10.5843	10.2246	10.6656	9.02436	7.00998	7.66825	11.2549	5.23435	5.39893	5.49206	5.04009	4.13641	6.18748
Nha1	7.62953	4.02137	3.47708	1.61592	8.01683	6.18124	2.63439	1.00189	0.848319	2.84811	2.61459	4.5076	4.03491	4.57023	3.26451	9.16397	9.38949	1.97573	4.38339	9.72933	4.6999	2.69032	10.8088	1.79726	3.08243	3.08255	4.87247	5.08465	6.88091	6.73667	5.63634	9.81571	6.84339	8.41643
CR44915	0	0	0	0	0	0	0	0	0	0	0	0	0	0	0	0	0	0	0	0	0	0	0	0	0	0	0	0	0	0	0	0.0929182	0.0697755	0
CR44914	0.272895	0.139971	0.750361	0.471243	0.227638	0.982891	0.183389	0.102957	0.512593	0.148103	0.163546	0.87298	0.205687	0.529215	0.232889	0.119133	0.490227	0.752411	0.323399	0.494026	0.838221	0.300298	0.424103	0.226247	0.719129	0.212304	0.489064	0.55418	0.319336	0.173586	0.317996	0.043318	0.32529	0.778407
Nlg2	0.348455	0.473098	0.187867	0.552168	0.564235	0.253117	0.55098	0.48719	1.36954	0.784251	1.41881	2.44483	0.556175	0.466155	0.669085	0.214755	0.8653	0	0.637633	0.695749	0.812176	0.203	0.860076	0.415129	0.98036	0.255141	0.318361	0.507823	0.302218	0.645391	0.3941	0.117131	0.285863	1.1401
mir-932	0	0	0	0	0	0	0	0	0	0	0	0	0	0	0	0	0	0	0	0	0	0	0	0	0	0	0	0	0	0	0	0	0	0
CG13773	9.74041	8.5645	8.437	7.09767	8.30362	7.93067	9.20712	6.66316	10.4261	7.5808	8.13071	7.04383	6.45412	8.03876	5.20671	9.81274	6.92213	10.3291	7.99135	8.86504	7.69333	11.0718	8.04004	10.0404	9.18117	8.3272	6.71389	10.9987	8.60488	7.04687	10.0561	6.06564	7.61702	8.85411
Rat1	6.68409	7.62051	7.23725	6.31536	6.24004	8.23263	5.19001	7.25168	5.7153	4.5955	5.46384	5.93508	7.38725	5.34851	6.16231	7.84671	6.33025	7.25701	6.67959	7.05328	6.25497	7.69826	6.58424	6.71875	5.25677	5.55029	6.7859	7.37058	6.44369	7.18713	6.06856	6.74531	5.89506	6.30585
Wee1	2.61782	3.55817	2.71926	1.763	2.72959	2.02042	3.31318	2.96293	3.37178	2.59281	3.45149	4.30678	3.48582	3.39211	4.02128	4.32363	3.86007	2.2856	3.10229	3.25811	3.05552	2.9287	3.11904	2.66641	3.19053	2.64756	2.6585	2.49857	3.52281	3.76745	3.43176	3.57364	3.35446	4.14837
x16	13.4032	13.3507	17.2103	10.7339	10.7753	15.8916	12.7492	10.3333	16.4712	10.1204	9.86603	11.7177	6.93005	11.5407	6.92098	8.45168	8.57828	14.2819	11.5675	13.0111	11.396	14.179	10.331	15.8284	14	9.87316	9.24451	11.9393	8.11482	9.57591	8.20524	8.54104	9.47014	9.63476
CG32829	0.401298	0	0.122602	0.138594	0.167373	0.20648	0.0898925	0.302801	0.43073	0.217789	0.360747	0.183391	0.403289	0.141495	0.171234	0.175187	0.240296	0	0.475565	0.363237	0.246524	0.147198	0.415768	0.0950575	0.422998	0.312198	0.519407	0.380302	0.328713	0.191447	0.526071	0.1911	0.143504	0.508739
nop5	33.0593	33.1927	35.7988	25.5903	28.9076	25.0225	34.4824	30.2663	19.6258	30.0817	27.1943	28.3054	30.4975	12.0503	15.6859	37.5011	18.8309	26.5705	28.3621	32.4945	20.5245	45.579	32.2016	25.1708	23.6125	29.8898	29.8711	43.8321	23.0991	26.3367	18.5178	22.2772	11.434	22.0272
snoRNA:nop5-x16-a	1.14562	1.7628	1.05001	0	0	0	0	1.29665	0	0	0.514927	0.785311	0.863478	0.605905	0	1.00024	1.02899	0	0	0	1.05566	3.78197	0.593464	0	0.905676	0	0.342183	0.465292	0.804347	0.546539	0.500607	0.545549	0	0.544628
Hrb27C	86.957	87.2088	103.916	105.845	88.2023	115.098	69.3668	76.4858	121.294	80.1507	84.6314	82.6742	91.5352	135.388	113.401	84.1561	84.5783	99.9306	80.2569	79.7338	95.215	88.3946	76.1022	109.035	83.7391	78.5228	69.1648	78.0628	93.8273	101.555	114.262	106.569	140.752	89.1331
CG43232	0.933125	0.957219	0.285084	0.644538	0	0.480122	0	0.352047	3.00469	1.01283	0.699028	1.70573	2.10995	2.13859	1.79174	1.08628	0.419065	0.857586	0	0.844624	0.859852	1.3691	0.805644	0.77362	0.860635	0.725944	0.278714	1.01063	1.20112	1.3355	0.951422	1.4812	1.89088	1.03509
CG18304	24.0963	17.9624	22.0694	19.2977	16.8518	13.2051	18.1601	10.8461	15.779	14.2262	15.0596	9.2084	7.76116	7.28902	6.4903	7.11933	7.3083	19.3594	20.6271	21.5744	16.7294	24.2535	16.7157	14.4181	15.544	13.4192	15.8725	14.3863	8.39793	12.1024	10.7883	13.9888	11.1215	10.478
CG10158	4.63282	5.12916	4.55688	4.91712	4.87776	3.31397	4.36624	3.96465	4.41167	3.9094	3.63139	4.60872	5.11004	4.84074	4.77331	5.32746	4.77014	5.45204	5.82498	4.90938	3.95666	6.09276	5.00475	4.59704	4.19848	4.2635	4.94445	4.81877	5.03778	5.01332	4.3698	5.43471	4.62661	4.61976
ihog	0.565116	0.978257	0.485582	0.402541	0.839675	0.763271	0.569649	0.679592	0.767682	0.776321	0.777892	0.387382	0.931744	1.00873	1.33378	1.32602	1.18965	0.876434	0.69063	0.671368	0.553287	0.505263	0.87824	1.02906	0.767861	0.714421	0.675175	1.07588	1.12832	0.791948	0.709957	0.992347	0.606255	1.14179
Gas41	14.3257	13.9891	15.7814	15.4137	16.029	16.5848	11.4784	9.97801	16.4113	14.129	11.5779	10.009	7.6829	14.5706	12.6958	9.86191	9.95977	16.7107	15.5486	11.0344	13.5816	14.0968	13.6292	16.2492	13.9932	9.0017	10.9442	12.0843	11.3154	13.603	12.7607	13.7095	16.1074	10.0192
SA	16.6206	18.2256	16.3717	14.3505	14.0236	18.9713	13.1378	12.0006	15.3534	15.2151	12.4509	10.2583	18.911	22.2288	21.6021	19.1263	16.7446	15.2751	14.0649	15.0875	15.6676	13.3493	12.2552	15.3521	13.1773	10.7753	10.1856	11.6516	17.3812	22.3141	23.3049	25.8369	27.7592	17.0744
CG13775	3.40004	3.43333	2.87283	2.97233	2.52596	3.36218	2.57048	2.52543	3.20749	2.46512	2.34011	2.47636	0.920964	2.2478	1.87017	1.69302	1.43152	2.49007	3.02196	3.318	3.47573	2.51379	1.89892	2.51053	2.96091	1.28123	2.11045	2.28715	1.49199	2.15429	1.64823	1.9733	1.97576	1.46484
CG3430	1.70072	1.89503	1.45128	1.70135	0.953933	2.35364	1.02467	1.26116	1.51072	1.28901	1.21255	1.72864	1.10506	1.05458	1.05101	2.9698	0.842802	1.77863	1.87647	1.75175	1.78333	1.54882	1.2152	1.31276	1.66905	1.23186	1.59402	1.5244	1.93524	1.06316	1.5376	0.698181	1.42607	1.42188
Atac1	2.35178	5.06626	3.10393	2.53414	4.00198	3.63019	2.02295	3.5136	2.65048	2.98663	2.41011	2.32146	5.03415	6.76644	3.85345	5.50296	5.36539	1.55621	3.84609	1.78813	3.46737	3.51959	2.58278	2.94137	2.826	1.9028	3.37176	3.09476	6.01037	5.78932	5.38498	5.86842	6.15607	3.533
CG10399	6.26986	7.16264	6.26903	5.90562	4.99233	5.42562	4.85184	7.20395	3.13544	6.2641	4.22722	3.12577	9.95268	4.87361	3.95222	8.33576	6.1862	6.28615	10.6387	6.4491	6.65291	6.4813	5.56093	4.05048	5.74524	4.87777	6.32758	7.44658	8.53744	9.15476	8.92502	6.6953	8.11911	7.99369
sip2	0.197369	0.835168	0.271346	0.46011	0.246955	0.685479	0.265269	0.279235	0.278046	0.120503	0.0443562	0.236766	0.148761	0.182676	0.157907	0.840075	0.243755	0	0.306988	0.200981	0.318274	0.108594	0.127804	0.245447	0.156031	0.0767736	0.221069	0.300604	0.744836	0.164778	0.194052	0.140982	0.211737	0.211116
Coprox	25.3973	17.8407	22.4825	17.8151	21.0209	8.27891	29.0463	18.0329	10.7305	22.1519	19.1794	14.3819	13.1382	6.00701	7.01714	15.6667	10.8745	17.1798	17.8061	21.8462	15.3355	29.2494	18.0187	9.78065	18.7062	22.581	32.6287	14.6397	12.1277	12.5678	10.8567	12.3197	7.36153	9.6741
smt3	128.01	122.929	124.892	126.338	122.564	115.865	120.979	113.688	127.997	121.957	124.594	113.05	116.673	123.464	108.546	129.646	107.285	100.043	104.917	121.367	103.034	127.326	96.9687	97.9393	116.835	104.677	106.286	103.287	120.273	110.475	134.059	128.667	124.52	104.536
snRNP-U1-70K	11.3824	9.7235	9.56906	8.49925	8.54522	12.2382	9.04704	9.41785	10.7427	9.10623	8.3798	8.42132	8.07621	9.67352	8.18965	8.29305	6.59245	8.76553	9.24453	10.0719	9.51204	9.97706	9.27157	9.31583	10.3326	7.93909	8.05396	9.5328	7.34404	9.28746	8.04384	8.84075	9.85297	8.93777
uif	1.03765	1.02427	1.48041	1.39966	0.906391	0.831074	2.66426	1.97218	1.39482	2.02413	2.68838	2.34192	2.08805	1.43413	1.46613	1.32904	1.23096	1.45746	1.73142	1.14303	1.29894	1.93898	2.03856	1.1165	1.69868	4.38662	3.90926	2.68767	1.16841	1.65321	0.889742	1.48706	0.924154	1.47059
CR44326	0	0	0	0	0	0	0	0	0	0	0	0	0	0	0	0	0	0	0	0	0	0	0	0	0	0	0	0	0	0	0	0	0	0
CG43321	0	0	0.195666	0	0	0	0	0	0	0	0.0959551	0	0	0.112909	0	0	0	0	0	0	0	0	0	0.0758531	0	0	0	0.0867056	0	0	0	0	0	0
CG43322	18.5569	18.3362	14.4236	8.95361	9.21933	21.062	13.3874	8.95727	12.0093	23.7705	10.8349	4.61432	21.46	29.4436	24.0457	22.8735	19.6091	15.8006	23.9316	18.0319	16.9321	14.7146	8.10508	6.88438	10.4993	14.7198	9.83562	12.7831	26.6007	35.7588	37.0067	33.7014	39.4577	26.4226
ade3	12.0307	21.678	17.017	23.2495	12.1759	15.1702	13.762	15.0962	7.0736	20.9472	15.2541	13.8057	28.371	29.7148	59.1694	36.6055	42.7344	14.8832	34.4668	23.0392	15.1233	24.4797	15.3862	11.0522	11.2332	68.8687	46.4615	36.7894	54.4625	34.5523	44.5109	42.9738	50.2582	42.1071
Pcp	0.322305	0	0.147703	0	0.20164	0	0.64978	0.364795	0.129729	0.655944	0.217302	0.220937	0.364393	0.170464	0.309437	0.281405	0.289493	0	0.143233	0.218802	0.148498	0.177335	0.667854	0.458076	0.5733	0.626859	0.673882	0.392711	0.509159	0.230643	0.352098	0.0767416	0.115256	0.38306
CG31908	11.8688	13.0092	10.7293	12.2411	11.528	13.8032	13.6576	14.415	12.3903	12.1327	11.6682	13.3371	14.1335	14.2457	15.3667	13.9352	12.3886	12.4023	14.3062	14.4959	11.2365	15.625	12.8583	18.0625	11.0753	16.6542	14.666	16.5086	13.7745	15.513	12.5278	14.659	14.6709	13.8614
CG3476	25.6508	23.596	25.81	27.2508	28.1415	18.793	34.7877	33.0296	25.8862	35.2564	34.8389	30.8347	17.5123	18.6784	18.2023	21.0163	17.7387	22.5494	22.1377	21.9562	21.1531	24.0335	26.8165	32.2295	35.8178	36.8021	31.5625	21.893	21.0765	20.8387	24.5293	25.9791	27.8172	17.0103
Rab30	5.2364	3.98538	4.23172	4.25866	5.98837	5.73623	7.18922	9.36804	7.52416	6.64626	7.69359	8.99306	5.81409	6.40255	8.18068	5.65344	5.43663	5.12298	4.90434	4.66331	5.44782	4.15127	6.12524	10.9433	5.92017	7.49047	7.16437	4.87096	5.39617	4.1904	4.08427	5.06763	4.93301	4.09544
CG11266	34.2957	30.0606	34.9554	28.1292	27.7693	29.0469	34.6552	36.5001	31.4243	29.9946	30.2167	30.0083	33.4283	30.9021	28.9844	29.8809	28.2238	31.1893	33.1951	40.1283	26.2418	33.0369	29.0026	28.8373	29.9943	31.9893	30.817	34.553	33.1184	33.8193	30.2395	40.2565	33.813	30.5085
milt	11.6507	9.21912	14.1226	17.0906	13.577	12.5795	14.3405	13.9895	13.4002	14.9024	16.6259	18.5489	12.5465	12.3239	15.8124	11.9577	12.8707	13.8561	12.3136	11.2492	19.2328	13.8337	17.6606	15.5827	13.3983	18.4918	18.9368	13.3315	11.4648	13.1683	11.3362	13.0654	12.7255	11.63
Mnn1	10.7355	11.5734	10.6211	9.31073	9.7941	11.34	10.3735	13.0664	16.9323	12.2993	13.2476	14.5983	7.21817	9.26273	7.36108	6.27108	8.12061	11.0922	11.4073	12.112	11.7058	9.8406	10.6582	17.4953	11.8663	14.7647	10.9063	11.0915	7.83684	7.87535	7.74853	7.14265	8.18624	8.91843
CG31907	0	0	0	0	0.0919807	0	0.0494009	0	0.0591775	0	0	0	0	0	0	0	0	0	0	0	0	0	0.0380812	0.0522393	0.0290576	0.05719	0	0	0	0	0	0	0	0
Sem1	87.5258	82.5584	84.4435	106.969	83.4082	101.642	97.7881	77.5954	95.3268	94.1936	108.887	89.3471	67.8083	72.8052	75.793	87.0656	96.1396	68.7354	66.2325	71.0078	81.6517	99.8929	87.0321	122.759	82.9043	55.4437	90.084	72.7478	86.8516	70.972	71.9936	87.7478	78.7808	63.5097
Nuf2	0.0896957	0.828106	0.16442	0.929334	0.673384	0.553815	0.542491	0.507602	0.577646	0.584146	0.524108	0.491885	0.405634	0.237196	0.344459	1.01808	0.72508	0.494608	0.159443	0.608915	0.66122	0.493513	0.696975	1.01984	0.496366	0.558245	0.509031	0.510017	1.00762	0.38512	0.352753	0.341708	0.545277	0.426414
CG11289	0.152951	0	0.140186	0.158472	0	0	0	0.0865575	0.0615634	0.0622562	0	0	0.345848	0.404471	0.342637	0.166927	0.240415	0.421708	0	0.207667	0.563763	0	0	0	0	0	0.114212	0	0.53694	0.547262	0.334179	0	0.574299	0.181783
Pvf2	1.10093	1.01642	1.21086	3.47904	3.03055	1.95429	2.36748	4.17432	4.38696	2.15095	2.44946	4.33939	1.28618	1.39745	1.83209	0.841069	1.77993	1.97302	0.929581	2.16741	2.1304	3.08927	5.6461	6.37613	3.00269	4.32527	3.89669	3.77834	2.14499	0.84035	0.938102	0.996107	1.1417	1.04676
CR44611	0	0	0.420004	0.237394	0.286688	0	0	0	0	0.186522	0	0	0	0	0.146651	0	0.102899	0	0	0	0	0	0	0	0	0	0.136873	0.0930583	0	0	0	0	0.0819344	0
Pvf3	0.619058	1.09689	0.5502	1.04957	0.539865	1.15827	0.844637	0.721902	2.52193	0.91628	1.79598	2.88049	0.862498	1.17075	0.972559	0.425849	1.28899	0.775832	1.28385	1.22257	1.08903	1.01151	1.20502	1.01981	1.68324	0.55458	0.706003	1.00572	0.856119	0.939697	0.778749	0.562797	0.892206	0.981001
CR44612	0	0	0.0358281	0	0	0	0	0	0	0	0	0	0.0294633	0	0	0	0	0	0	0.0530744	0	0	0	0	0	0	0	0	0	0	0	0	0	0
CR44610	0	0.420905	0.250712	0	0.342264	0.422235	0.183823	0.309602	0.440404	0.44536	0.12295	0.187509	0.206173	0.57869	0.350159	0.358243	0.245693	0.754189	0	0	0.252061	0	0.141702	0.388769	0	0.212806	0	0.111098	0.288082	0	0.23906	0.651306	0.195635	0
CR44613	0.394906	0.607654	0	0	0.494122	0	0	0	0	0.32148	0	0	0.297649	1.25317	0.505519	0.51719	0	0	0	0	0	0	0	0.140315	0.156098	0	0.117954	0	0	0.188398	0	0.752225	0.423654	0.187739
CG4495	168.685	157.407	156.842	171.099	131.673	137.974	163.856	131.84	162.737	176.342	150.842	96.3725	35.5444	48.711	58.8071	40.4243	42.4821	133.079	135.792	133.4	176.681	126.838	144.022	152.714	144.022	139.294	126.838	113.682	43.6154	41.6912	50.4886	53.4907	52.0778	40.0437
CG4496	4.18623	2.51218	5.29488	7.54697	5.39512	2.58474	5.42949	4.73811	5.12232	5.45259	6.24694	5.42359	3.6601	2.78971	11.8429	3.58191	4.04207	6.34812	4.50209	3.63763	7.36785	4.69873	4.55404	5.93482	5.31167	7.39286	6.07685	3.68951	3.54172	2.69612	5.19515	4.62493	2.94908	2.78619
CG4497	50.4453	35.1409	50.2979	75.0533	46.0056	42.8106	65.1049	37.8407	56.9543	70.7569	70.014	36.7501	43.8125	54.2083	85.6767	36.3592	44.5325	47.1375	38.9453	31.4086	62.0047	40.9711	42.0957	43.0772	62.8232	72.1515	54.1671	42.4853	32.7061	54.4553	47.1303	70.4586	43.9129	43.6086
CG4502	22.5635	20.9512	24.6536	35.067	23.8515	23.8484	26.8154	20.1286	29.4826	26.376	28.6517	25.4102	19.2686	26.2187	35.4642	22.8542	17.7456	24.823	25.1422	17.5813	31.034	29.6605	26.3712	28.7905	25.8559	33.9834	31.5228	26.409	16.6419	22.6158	21.3708	26.4652	26.1736	20.8722
CG13784	29.3776	27.3837	35.6744	34.0423	36.3868	36.1467	24.1467	26.3123	27.3545	24.4333	25.0552	32.0319	27.3544	31.5911	34.7417	26.2423	21.8239	29.7091	30.0134	21.8587	30.6476	27.3792	23.4705	24.9463	24.8764	28.614	25.2789	28.7566	23.5675	23.4868	23.1071	26.2523	33.4656	22.4164
ico	14.6079	11.879	14.5328	13.7941	12.6673	18.2673	10.7487	8.99935	12.8014	14.4884	12.6954	10.2354	17.0032	15.8187	11.8648	16.4674	11.3561	13.7652	14.3394	11.2349	14.6962	12.0561	10.5128	7.80199	13.9969	7.76815	11.0875	8.67417	14.1673	17.4666	17.5136	12.5919	20.0024	14.1969
CR44989	1.47712	2.6517	3.15897	1.78551	1.84823	1.90006	1.81985	2.50777	1.58545	0.801647	1.2172	1.01255	1.29889	2.34369	2.206	1.71957	2.3218	0	1.9693	1.33702	0.680564	3.25088	1.91297	3.14903	1.45968	0.383051	1.39713	2.39972	2.07419	1.64427	2.04397	2.11023	1.67268	1.75556
Ndae1	13.7458	12.1909	16.5376	14.089	13.7923	15.521	12.6435	12.2904	10.5373	11.0698	12.143	13.4256	15.244	14.3492	12.6931	14.5292	9.17879	20.0802	17.4512	13.6522	14.2082	15.7398	8.48879	9.87303	8.4354	12.9908	15.0706	13.6373	10.5724	14.0623	17.4033	10.6233	14.8344	14.4732
CG43799	0.135489	0.208481	0	0.561518	0	0.627419	0.364202	0.153351	1.74511	1.32356	0.121798	0.371506	0	0.143317	0	0.0591478	0	0	0.120423	0	0.873948	0.298188	0.491311	0.433268	0.321335	0	0.080938	0.495258	0.0475639	0	0	0.0645205	0.0484507	0.128823
CG43800	0.980572	1.50884	1.97722	0.812774	1.47232	1.81633	0.395375	0.665906	1.26299	0.6386	1.49853	1.20991	1.18253	1.86701	0.627615	1.54105	0.616522	4.32572	2.09168	0.532543	1.44572	1.29484	1.01593	1.60269	0.697677	0.457714	0.644349	0.716864	0.481927	1.21628	1.11406	0.466953	2.45456	0.839096
CG13786	0.0529554	0	0	1.1522	0	0.0817416	0.0355867	0	0	0	0	0.0363004	0.0399136	0	0	0	0	0	0	0	0	0	0.0274324	0.0376315	0.0418642	0	0	0	0	0	0	0	0	0
Wnt4	0	0.158636	0.0314972	0.320451	0.472989	0.583504	0.369502	0.272269	1.05124	0.139878	0.926778	0.518254	0.72525	0.708839	0.175963	0.450064	1.55877	0.852747	0.122175	0.653223	0.095	0.151264	0.65868	0.244208	0.597687	0.0267351	0.359257	0.502465	0.277472	0.245918	0.105117	0.0327297	0.331802	0.980233
CG31909	0.73699	0.283508	0.506613	0.190898	1.15269	0.284403	0.247634	0.625612	0.889924	0.14999	0.828148	0.5052	0.277743	0.389786	0.235855	0.402167	0.165491	2.53998	0.16376	0.500319	0.509339	0.405498	0.190891	0.654655	0.291316	0	0.275163	0.673487	0.194042	0.175798	0.322046	0.263219	0.724754	0.437957
wg	0.277476	0.365967	0.254319	0.492843	0.644779	1.52968	0.61268	0.762708	0.670111	0.387229	1.42536	0.489105	0.836559	0.587016	0.558167	0.813318	1.28174	1.20221	0.21139	1.02258	0.876643	0.130859	1.02672	1.07041	0.705087	0.18503	0.887989	0.563483	0.556623	0.434947	0.36375	0.528542	1.134	1.2249
CR45304	0	0	0	0	0	0	0	0	0	0	0	0	0	0	0	0	0	0	0	0	0	0	0	0	0	0	0	0	0	0	0	0	0	0.095499
Wnt6	1.37795	1.12251	0.26002	0.923801	1.4706	1.75165	1.93371	1.33026	1.33764	1.08875	3.62505	1.38908	1.34406	1.77909	2.0752	1.53925	2.65736	2.45831	1.26075	1.59576	0.858949	0.668964	1.9735	2.23202	1.26557	1.98636	2.37263	2.23861	1.2947	1.48877	1.23968	1.48607	1.30435	3.391
Wnt10	0	0	0.0446531	0	0	0	0	0	0	0	0	0	0	0	0	0	0	0	0	0	0	0	0	0	0	0	0.0145518	0	0	0	0	0	0	0
CR44063	0	0	0	0	0	0	0	0	0	0	0	0	0	0	0	0	0	0	0	0	0	0	0	0	0	0	0	0	0	0	0	0	0	0
ninaC	0.0853143	1.18148	0.371423	0.154689	0.106749	1.05352	0.888652	0.337965	0.0686786	0.711878	0.00958667	0.131585	2.95795	0.0789632	0.900989	0.027933	0.34483	0.823283	0.0947844	1.15834	0.294806	0.445935	0.0441953	0.310711	0.278214	0.215709	0.0063706	0.0779631	0.112312	0.172978	0.596483	1.1985	0	0.162234
CG5149	8.83961	11.069	6.5374	8.52706	12.8912	13.4566	7.33325	12.6269	14.0847	10.3722	9.20684	11.9936	12.8198	15.0895	12.4081	14.664	13.169	11.2616	7.91085	8.35991	10.561	7.64762	10.3268	10.4405	10.41	9.3906	9.35938	7.97271	13.4186	12.6804	12.1741	11.0898	13.9522	13.6214
gudu	0	0	0	0.0532345	0.0642885	0	0	0	0	0.0418266	0	0	0	0.0271743	0.0328857	0.0224299	0	0	0	0	0	0	0.0532326	0.0547678	0.0203093	0	0.0306932	0.0626036	0	0	0.0224517	0	0	0
CG5160	1.50982	1.26721	1.82413	1.42211	1.37393	1.27121	2.99775	2.33027	3.64626	2.06712	3.02298	3.52831	1.65526	2.83115	2.28413	1.58787	1.75679	0.946092	0.975953	0.931792	1.89718	1.73695	6.11486	4.55991	3.60793	2.29581	1.55789	1.89539	1.59009	1.17866	2.00926	1.47065	1.44795	2.15331
CG5171	134.021	107.012	141.147	154.226	143.263	155.36	101.811	96.6151	129.636	122.532	111.26	98.3026	248.515	407.563	465.179	278.032	251.46	126.858	114.073	97.7124	129.982	120.831	104.121	132.667	117.886	124.34	93.6005	126.507	220.366	245.676	306.906	314.026	323.113	249.638
CG5177	131.163	131.273	158.368	135.79	142.586	172.085	201.697	140.874	177.167	159.198	189.043	130.24	71.2135	133.564	107.098	93.3329	93.7019	182.664	201.286	157.1	151.815	224.607	170.105	136.443	154.112	147.089	173.849	156.927	85.6157	95.2614	100.222	83.3622	75.4585	108.741
CG5181	6.38583	7.03958	6.55176	8.29511	6.67838	8.09168	5.70048	7.33557	6.52171	7.21582	8.39662	5.42279	4.74131	8.87197	7.74748	6.86534	5.86415	6.83243	6.94643	4.52925	9.66094	6.08313	7.20859	7.61967	6.78138	6.74757	7.31636	6.6969	5.2531	6.36579	6.16398	8.21514	8.00953	6.2529
CG15818	62.715	12.804	1.04365	17.243	75.8411	178.47	177.058	53.7329	45.9029	40.5724	210.432	160.554	85.6928	5.09584	145.034	210.308	27.7718	214.694	7.08443	76.1121	5.6499	0.578317	15.5635	108.367	190.01	41.3629	34.0111	21.9853	141.046	0.334295	140.24	0.208556	4.88629	39.3088
chm	2.95023	3.64167	3.09031	3.22468	3.24523	4.55396	3.22444	3.55933	2.79254	3.32541	3.52644	3.44468	3.20109	3.20643	4.04635	3.4675	3.13036	2.94977	4.12056	3.25733	3.01731	3.24648	2.85508	3.95112	3.47286	4.11117	3.13746	3.56837	3.31193	3.09333	3.7542	3.98317	3.54758	3.09792
CR43857	0.0886647	0.136431	0.406326	0.551191	0.665644	0.547449	0.29792	0.100354	0.428255	0.216537	0.478231	1.21558	0.133657	0.328257	0.226999	0.193533	0.238915	0	0.0788054	0.240766	0.32681	0.195136	0.367448	0.567067	0.350472	0.551828	0.185382	0.144044	0.311261	0.253795	0.503676	0.211113	0.0951193	0.0843025
mir-275	0	0	0	0	0	0	0	0	0	0	0	0	0	0	0	0	0	0	0	0	0	0	0	0	0	0	0	0	0	0	0	0	0	0
mir-305	0	2.43894	2.90551	1.64225	1.98326	4.8933	2.13033	3.58798	3.82789	0	0	1.08653	0	0.838308	0	1.3839	0	4.37017	1.40878	0	0	0	1.64219	3.3791	2.50612	0	0	1.93128	0	0.756171	0.69262	0	1.13361	0.753526
CG5261	210.502	215.09	196.396	219.861	157.064	135.976	178.324	145.121	168.733	218.709	142.231	106.888	163.108	173.577	131.438	156.112	157.185	211.77	251.291	242.156	175.093	178.392	139.493	105.658	189.869	145.878	167.05	109.692	158.004	245.508	219.202	249.222	216.102	191.684
CG5958	51.0532	49.7428	81.9321	96.908	67.0861	51.2692	99.68	95.265	58.8704	78.2272	84.3906	81.6135	54.1542	65.8878	86.9904	67.1202	61.6132	49.4566	57.2896	58.6115	51.4944	83.6188	65.1987	35.9646	82.3571	85.3398	138.86	84.0616	67.434	87.2205	82.9911	110.248	57.4836	64.4721
CG5973	29.8893	27.1032	42.74	39.9237	33.8542	34.0281	27.7006	15.9077	29.9375	26.3127	21.7433	24.1982	39.4723	67.4967	46.9549	37.3213	42.4879	40.7539	36.0557	28.0078	40.4265	27.3755	15.8786	13.4977	22.2797	16.4438	21.2288	27.5831	45.2986	43.1243	39.262	41.1265	57.4419	47.2725
santa-maria	12.9165	14.5942	14.8696	20.0633	17.8532	18.9425	7.67367	10.0051	12.3904	9.02484	7.66606	12.0764	8.04231	15.0709	14.7904	9.15267	9.52783	14.8529	18.8009	11.4938	18.3804	14.9917	10.2037	9.87347	11.4444	10.2752	9.9339	11.6494	8.8278	10.3098	8.67077	11.3509	14.4072	11.312
Gr28a	0	0	0	0.0846042	0	0	0.0548744	0	0.0657342	0	0	0.11195	0	0	0	0.0712946	0.0366719	0	0	0	0	0	0	0	0	0	0	0	0	0	0	0	0	0.0388196
Gr28b	0.0542718	0.167019	0.0248713	0	0.0339535	0.0837736	0.164121	0.0614266	0.56796	0.265085	0.219545	0.26042	0.122718	0.129167	0.052105	0.0947697	0.0974935	0.0748176	0.0241184	0.11053	0.0750152	0.0298607	0.070286	0.0674922	0.107262	0.0211109	0.0405259	0.0440848	0.057157	0.142403	0.0118577	0.0387667	0.0582226	0.090303
CG6055	0	0.153089	0	0.618491	0.248973	0.614292	0.267436	0.112607	0.640725	0.161984	1.16268	0.0681999	0.224965	0.263097	0.127358	0.521192	0.312767	2.19448	0.0884274	1.4859	0.0916781	0.218962	0.721546	0.247452	0.432591	0.0774007	3.41742	0.484895	0	0.142392	0.260849	0.142134	0	0.425681
Ziz	6.32027	7.8211	6.50014	8.40954	8.44092	9.83808	7.40373	6.03905	10.9684	7.6581	8.06191	11.0364	8.27384	9.49333	8.49085	6.92975	8.29417	9.97861	7.7935	8.59932	10.2134	5.95927	8.16109	10.3206	7.74725	8.64354	6.25555	7.66848	6.6656	5.66859	5.88409	6.09552	8.31249	6.8443
CG6441	0	0	0.0519349	0.0587092	0	0	0	0	0	0	0	0	0	0	0	0	0	0	0	0	0	0.0623537	0	0	0	0	0	0	0	0	0	0	0	0
Obp28a	0	0	0	0	0.251787	0	0.676148	0.227759	0	0.163815	0.361792	0.413825	0	0.106429	0.128798	0.0878473	0.81335	0	0	0.273218	0	0.442874	0.104243	0	0	0.156551	0.0601053	0.326918	0.141285	0.0960008	0.175865	0.0958269	0.0719598	0.0956651
RapGAP1	4.65211	5.37478	6.01535	7.28685	5.86009	6.16548	6.08414	4.18396	7.79259	6.80917	6.8785	9.22334	5.69052	7.37307	7.54922	5.65502	5.67686	6.17574	6.26485	4.76383	6.95704	6.11897	5.71242	6.14431	5.99956	7.78677	5.45988	6.55899	6.23563	5.6568	6.29022	5.62417	6.86721	6.06146
CR44082	0	0	0	0	0	0	0	0	0	0	0	0	0	0	0	0	0	0	0	0	0	0	0	0	0	0	0	0	0	0	0	0	0	0
Spn28B	0	0	0.0849768	0	0	0	0	0	0	0	0	0	0	0	0	0	0	0.255627	0.0824047	0.125882	0.085434	0	0	0.0658852	0	0.072129	0.0276927	0	0	0	0	0	0	0
CR45370	0	0	0	0	0	0	0	0	0	0	0	0	0	0.190643	0	0	0	0	0	0	0	0.396655	0	0	0	0	0	0	0	0.171964	0	0	0	0.171363
Cyp4d21	18.808	8.21284	9.14334	21.067	26.475	3.82516	9.00974	3.66778	1.94373	2.37941	3.05591	1.74226	25.1433	38.3108	11.55	15.5337	9.04591	39.4179	13.8364	13.6309	19.9074	3.07653	1.15206	1.39976	0.703254	1.82901	5.23817	7.09691	31.6971	22.6137	18.2976	18.0642	28.2435	23.4106
CG6739	0.297996	0.196515	0.429199	0.220537	0.798994	0.459984	0.171649	0.337281	0.137079	0.242588	0.133942	0.0875458	0.417125	0.90061	0.790176	0.446024	0.497081	0	0.75674	0.2312	0.353052	0.608992	0.0882117	0.121008	0.117791	0.0993565	0.190731	0.363092	0.373616	0.568658	0.372048	0.628445	0.548038	0.404764
CR44799	0	0	0	0	0	0	0	0	0	0	0	0	0	0	0	0	0	0	0	0	0	0	0	0	0	0	0	0	0	0	0	0	0	0
CR44800	0	0	0	0	0	0	0	0	0	0	0	0	0	0	0	0	0	0	0	0	0	0	0	0	0	0	0	0	0	0	0	0	0	0
Slob	0.503213	0.943689	0.345913	0.488791	0.511582	0.582567	0.54952	0.498358	1.08868	0.793694	1.32175	2.2206	0.900796	0.374265	0.764943	0.329517	0.868657	0.563643	0.754745	0.768633	0.768	0.605656	0.839061	0.737542	0.944817	0.367017	0.507276	0.696167	0.430596	0.637679	0.501627	0.434334	0.438624	0.8672
Myo28B1	3.50251	1.2216	0.171211	1.35481	3.95397	5.43049	1.83069	6.73043	1.10276	1.24189	2.60983	4.48176	3.00364	0.798608	1.07606	2.12025	3.20187	2.57518	0.304386	2.59967	1.36271	0.839363	1.4112	6.05098	2.41205	2.61586	3.5616	1.03687	3.02748	0.794625	1.44888	0.674579	0.545531	0.762244
CR44148	4.76077	0	0.189716	0.214462	0.776982	1.27803	0.1391	0.702834	0	0	0.093037	0.28378	0.624052	0.437899	0	0	1.02255	0	0	0	0.572209	0.227775	0.214454	0.147093	0.163637	0.161032	0	0.168138	0.290659	0	0	0	0	0
CG18585	35.8588	0.250236	2.01221	0.33699	9.1567	0	0.54643	0.0920319	0.196371	0	0.146192	0.836084	0.429008	1.16114	0.364308	0.283976	0.328655	8.07083	1.2286	11.4817	8.24201	0.178955	0.126367	0.115565	0.032141	0.253034	0.17001	0.198149	1.08471	2.67662	0.24872	0.154885	0.378004	0.309248
CG7025	10.4565	0	1.17835	0.177606	4.82592	0	0.51838	0	0.344983	0.209319	0.115573	1.11631	0.258404	0.271984	0.384007	0.224499	0.307935	3.54469	0.685607	2.90926	2.84324	0.188631	0.1332	0.121814	0.033879	0.133359	0.0256004	0.174054	0.270797	0.0817785	0.112358	0.0408152	0.214547	0.0814925
CG43235	0.34132	0.5252	0	0	1.06768	0.26343	0	0.579475	0.824296	0	0	0.58493	0.12863	0.451301	0.327693	0.0745018	0.996361	0	0.151683	0.695133	0.471777	0	0.707255	1.81913	0.269833	0.265537	0.407794	1.10901	0.119822	0.0814166	0.223723	0.0812691	0.122056	0.0811319
Tep2	39.4079	39.5276	59.6036	58.6271	52.7858	79.7104	46.9071	117.786	67.5868	55.4153	59.3151	78.0415	96.414	110.785	122.432	79.1976	85.4734	53.0296	56.9826	41.3249	62.2632	53.2372	141.371	154.941	129.088	149.155	84.0093	108.27	95.3807	64.5328	90.4424	78.389	112.221	76.3113
Tep3	12.7729	9.89929	21.6707	16.4695	13.661	13.4824	20.3702	14.8554	26.4618	21.1018	22.1413	26.7339	15.9451	22.4519	22.963	14.4321	15.3952	20.9099	14.3159	13.3255	16.8976	19.4297	20.4341	18.8626	22.3764	26.3402	23.024	25.6715	14.8449	16.2644	15.9851	20.3496	18.942	19.0204
CR44990	0	0	0.0780361	0	0.106532	0	0	0	0	0	0.0765381	0.116728	0	0	0	0	0.0764739	0	0.075674	0	0	0	0.0441059	0	0.0673092	0.0662377	0	0.0691603	0	0	0.0372048	0	0.0304466	0
Ntl	0.688735	0.57065	0.971164	0.494028	0.795482	0.163558	0.640855	0.779532	0.980927	4.18351	0.690578	0.61739	1.55734	1.17685	2.88232	1.27206	3.64034	0.292145	0.329619	0.0719323	1.46458	1.57409	0.795905	0.545906	0.984259	0.494599	0.490557	1.2265	0.409171	0.606599	1.52795	0.580271	0.719927	0.604477
CG33296	25.5874	35.5355	12.1885	36.4143	21.6906	31.7989	9.41542	11.4902	33.5496	19.7183	15.8238	31.7836	6.89099	17.238	19.1511	8.60444	6.7188	21.9338	24.589	17.0078	22.32	22.5385	18.268	21.1785	23.3024	13.2093	12.7851	16.6373	7.81546	11.6972	8.35338	14.6727	14.7972	11.0071
CG13793	13.6303	13.0275	6.60412	11.5094	7.28772	21.7811	5.81059	4.34952	11.4075	6.159	4.15629	6.13293	12.9889	15.0212	22.0216	11.9793	7.98202	10.5954	7.41822	6.60359	6.75031	7.33431	6.53211	8.53396	10.3008	5.65234	4.95003	5.87735	10.7504	12.2031	12.2271	14.7259	18.2513	12.2746
CG13794	27.9136	33.641	30.8683	36.3142	25.07	49.8721	18.72	21.6438	36.5781	31.7386	16.4977	24.8867	42.7236	63.34	61.5267	34.14	32.1731	34.1528	35.5656	21.4685	31.4026	31.6588	27.8852	26.5902	27.8436	25.1799	21.1762	23.7175	44.8879	39.6507	47.3435	41.2914	69.6283	42.7142
CG13795	23.5675	23.1548	29.8759	39.1938	36.0351	47.671	16.7089	42.6581	38.2794	31.3979	19.1881	30.9458	30.5362	51.8909	47.7128	29.6929	33.3743	32.4256	27.0786	25.4604	36.3512	29.1949	36.2901	55.0797	46.9629	55.6888	32.3754	51.2256	36.6535	26.2859	40.4045	34.0437	58.4144	28.9455
CG13796	21.8861	17.5789	14.5365	13.6577	17.9598	23.7064	18.1667	25.2924	27.6573	20.6783	20.6902	12.4497	18.2308	20.539	17.5169	16.9166	12.5353	22.0373	17.5555	22.1588	16.4656	14.2292	14.481	19.5228	23.7036	22.6263	14.3742	15.8234	19.1713	12.9766	20.9194	16.3608	27.9088	13.9657
CG31904	0	0.149532	0.118758	0.0335622	0.243188	0.150005	0	0	0.130383	0.0791099	0.0291196	0.0444101	0	0	0	0	0	0	0	0	0.149246	0.142583	0.184585	0.0345289	0.0256084	0.0252007	0.0677278	0	0	0	0	0	0	0
Acp1	0	0.207509	0	0	0	0	0	0	0	0	0	0	0	0	0.0863154	0.0588721	0	0	0	0	0.124268	0	0	0	0	0.104915	0.120841	0	0.0473421	0	0.0589292	0	0	0
CG7214	0.444601	0.17103	0.305623	0.230325	4.03319	4.1177	0.0746946	8.93205	10.7372	0.361935	4.34646	0.990503	0.586435	0.705435	0.213425	0.145568	0.449257	12.8712	0.197581	5.28194	0.716956	0.244623	4.31844	3.59388	11.3353	0.259415	3.02114	2.0766	0.312158	0.106053	0.534269	0.211721	0.278231	0.528409
CG7211	0	0	0	0.438333	0	0	0	0.239418	0	0	0	0	0	0	0	0	0	0	0	0	0	0.232772	0	0	0	0.164565	0	0	0	0	0	0.302196	0	0
CG7203	7.29116	4.39009	12.7842	6.56899	8.528	3.66997	6.81706	3.76738	4.72107	4.64516	2.35103	5.64994	2.98669	7.88009	7.81166	4.77444	12.9554	13.1105	4.22634	13.558	5.40411	3.48839	2.29906	2.81592	2.88203	1.23311	1.18358	9.78515	6.39897	9.52775	13.9217	9.88789	4.9879	7.53526
CR45718	0	0	0	0	0.757998	0.935107	0	0	0	0.49316	0	0	0	0	0	0	0	0	0.538435	0	0	0	0	0	0.239459	0.471293	0.180945	0.246044	0	0	0	0	0	0
CG7196	0.279622	0.258158	0.205029	0.057943	0.209924	0.345298	0.225492	0.316485	0.0900391	0.0910523	0.175956	0.115007	0.0843028	0.0591556	0.107383	0.0976553	0.150693	0.154191	0.298234	0.531513	0.412264	0.24616	0.231764	0.278189	0.309479	0.261045	0.384191	0.431558	0.0392649	0.0533596	0.0733126	0	0.0599955	0.132932
CG14538	0	0	0	0	0	0	0	0.183677	0	0	0	0	0	0	0	0	0	0	0	0	0	0	0	0	0	0	0.048472	0	0	0	0	0	0	0
CG7191	2.18316	4.98476	0.774567	14.4474	2.99601	2.50026	4.59065	6.21728	6.633	3.84113	6.10924	10.9585	3.92796	0.819429	3.06511	2.67472	2.46695	1.74753	2.69152	1.14741	2.4011	1.62742	20.5029	23.4964	5.92934	3.45166	4.27011	3.37513	1.82949	1.84786	2.12339	1.1067	0.780696	1.54007
CG7179	0.10396	0.879816	0.142926	0.376994	0.455276	0.240708	0.244519	0.411828	0.0836886	0.338521	0.490638	0.427582	2.93839	0.934717	0.332698	0.453839	2.47448	1.00321	0.369599	0.846901	0.718475	0.114399	1.23865	0.572544	0.986234	0.36395	1.00918	0.358897	0.456194	0.644749	1.18113	0.940619	0.65058	2.37229
Uro	17.0536	46.9796	3.61347	4.46478	21.1086	9.48222	5.11397	8.19806	1.10712	1.26885	4.65679	1.1313	33.1016	15.2264	1.0563	19.3323	55.4228	2.27512	15.1572	6.47322	15.7989	0.908032	2.99224	10.6527	3.84159	0.855946	3.12195	8.37857	65.3711	9.22924	15.9857	2.05208	19.7048	16.1274
CG7164	0.0936145	0	0	0	0	0	0	0	0	0	0	0.0641719	0	0	0	0	0.168168	0	0	0	0	0.103015	0	0.0665249	0	0	0.0279616	0	0.0985911	0	0.0409072	0	0	0
CG7154	10.2071	10.3031	9.50493	10.6178	10.677	9.32731	10.3713	8.59521	10.3203	9.33959	8.44161	10.4673	7.01629	8.39994	10.3483	7.6107	7.70109	10.0187	9.25351	8.53685	9.55607	10.3335	9.77143	9.63254	10.6353	10.5454	8.62184	8.656	7.81145	9.25202	8.95616	10.0907	7.75269	8.09389
CG7149	8.11406	10.3924	11.6497	9.23307	12.8522	18.5338	11.2522	6.05172	12.7617	11.149	10.119	14.5001	11.2063	10.3441	12.128	6.593	13.4175	9.828	7.96215	9.23369	6.74219	8.51594	6.80307	6.38267	11.2905	6.96929	5.88383	15.9061	9.8297	7.40631	11.1288	5.60609	6.27278	12.8209
LKR	10.1637	11.1563	10.2865	12.3486	8.36769	12.7247	12.5924	17.4615	9.08801	13.6102	8.94324	14.1158	9.78164	9.0175	9.70496	6.72051	20.2058	12.5966	16.5664	12.0915	7.35217	15.4832	12.0737	13.4336	20.1267	20.3472	13.8835	24.6065	12.7612	11.4349	18.8646	7.15754	6.10886	13.0003
CR44825	0.561687	0	0.257406	0.290981	0	0	0.188731	0.635735	0.226081	0.228625	0.252464	0.192516	0	0	0	0	0	0	0.249614	0	0	0	0.29097	0.698511	0.111011	0.436976	0	0.114064	0.197182	0.133982	0	0.133739	0	0
Herp	36.701	33.3135	28.6255	36.574	39.5311	38.442	36.7827	47.9851	39.5868	45.5146	45.9943	38.6978	41.9364	47.4033	58.3211	49.4665	48.7163	29.9083	32.6199	28.7812	32.7362	32.5776	33.482	41.2248	35.7853	48.1732	48.3712	33.2816	40.3022	41.3357	46.7692	59.2115	55.7456	35.5614
r2d2	12.6921	13.7466	12.7058	12.6395	16.035	19.0208	8.98471	9.4839	13.4411	10.4827	10.6895	10.981	14.5817	22.2562	14.8669	16.2726	15.1631	11.7213	10.1855	9.28547	12.2064	11.6614	9.09631	12.0841	11.3246	8.24437	9.84552	10.1596	15.9191	15.696	17.0691	18.7189	21.5036	15.4946
cdc14	9.67634	8.50343	12.3966	10.3821	10.1971	11.5176	8.22222	10.7816	13.3287	9.55765	10.7475	9.83164	12.4958	15.3759	13.24	11.4148	10.4198	12.2724	9.47949	8.70021	10.9376	9.20459	10.3817	13.2177	10.2506	9.66918	9.81388	9.86875	11.391	11.551	12.6568	12.851	14.7791	10.887
LanB1	10.4804	12.2436	11.0407	18.2822	14.6345	16.9735	11.1647	11.049	14.0415	11.8004	12.1782	16.5779	13.7717	15.2261	14.9603	12.817	9.99245	10.8169	14.0461	10.1032	13.4592	12.4853	11.5834	14.1426	11.7217	15.1605	12.7195	24.1331	10.7336	14.1296	14.1977	14.7005	10.9535	12.9419
CR45008	1.493	0.574331	0	1.54689	0.467025	0.576146	0.752488	2.11228	2.40375	1.2154	1.67767	0.767579	2.53194	2.96112	2.15009	1.62943	0.83813	3.08731	0.66349	0.506775	1.03182	1.23219	0.386709	1.85669	1.03276	0.290377	0.668913	0.757975	1.96546	1.0684	2.93582	2.13292	4.00421	1.95188
CG7115	60.1233	60.0037	57.0724	51.9897	49.5156	55.9257	60.148	50.4883	71.1214	65.6735	62.8766	55.7818	58.6281	86.775	64.8673	62.6719	59.5807	53.0186	64.9908	63.5908	52.2081	56.8972	54.3178	66.8296	70.1056	72.3282	52.494	62.447	65.449	71.0873	102.313	75.2424	84.7311	74.723
Rack1	372.273	342.519	381.17	265.402	300.416	170.588	470.262	493.213	113.007	327.591	317.023	307.896	291.048	112.453	165.44	333.237	284.283	249.112	407.476	420.82	226.343	532.694	377.2	180.817	242.731	422.915	524.287	493.622	248.756	297.685	203.38	263.46	150.55	286.311
mts	113.693	94.5314	130.837	180.599	134.136	98.7454	109.792	117.029	124.164	105.125	129.6	123.296	80.8574	92.3273	188.847	88.144	83.9935	125.058	93.3261	96.529	146.562	132.826	137.889	135.371	116.642	141.671	141.406	101.973	84.408	82.427	92.2393	97.0386	92.5978	77.0139
CG14537	0	0	0	0	0	0	0	0	0	0	0	0	0	0	0	0	0	0	0	0	0	0.156999	0	0.0506934	0	0	0	0	0	0	0.124689	0	0.0510196	0
CG14535	0.139024	0.24448	0.0728123	0.0823097	0.149102	0.122626	0.186852	0.157352	0.415685	0.210181	0.374927	0.776011	0.134724	0.168064	0.127117	0.060691	0.214064	0.109517	0.229477	0.296619	0.201311	0.109274	0.267497	0.190531	0.337569	0.154509	0.0711854	0.161327	0.104582	0.151598	0.0867856	0.0756615	0.113634	0.283251
lectin-28C	19.0819	22.1676	34.9787	71.7966	29.1553	39.84	12.5167	12.6487	27.5091	16.9573	5.51855	23.9461	15.6717	43.1431	35.4236	21.0744	27.0233	32.3843	16.3519	13.2121	59.7207	68.6825	24.4367	13.3034	23.8149	21.5875	17.9388	18.9275	47.0247	26.5303	25.7956	12.7976	38.6039	29.4192
TwdlE	0.42982	0.661377	0.15758	2.13761	1.3983	0.132693	0.462152	0.194594	1.31483	0.279921	0.386387	2.06246	0.194379	0.0909308	0.220085	0.0375277	0.0772125	0.237015	0.15281	1.75074	1.26742	2.55409	0.846105	1.16068	3.29603	2.60822	2.1825	0.663369	0.965695	0.246065	0.112692	0.0818729	0.215184	0.286071
Proc	4.7992	6.93439	3.1649	12.4917	8.64126	9.75689	12.5465	14.9046	64.5469	15.6275	55.3486	94.923	20.3802	12.1031	10.6761	3.39814	21.6057	4.3569	8.73915	6.51604	14.9928	5.28111	19.6465	14.2864	40.4389	6.3745	6.57297	14.1197	5.40361	17.6742	6.93076	3.84616	6.59267	19.2262
CR45364	0	0	0	0.307395	0.371225	0	0	0	0	0	0	0	0	0	0	0	0	0	0	0	0.273389	0	0	0	0	0.230813	0.0886167	0	0	0	0	0	0	0.141045
spz3	1.31486	1.25579	2.95048	1.55023	1.53174	2.30955	4.53989	1.53952	2.95642	3.21114	3.05688	3.54313	2.46051	2.32604	2.26355	1.48449	1.73078	1.87513	2.1761	2.52394	1.42051	2.49464	2.20782	2.98032	2.83166	4.05641	3.37209	3.13051	2.10101	2.27118	2.67468	1.55456	1.36193	2.58656
CG7102	0.255538	0.0786408	0.234212	0.0529524	0.319739	0.157779	0.27476	0.231381	0.164568	0.374444	0.160801	0.385371	0.154084	0.243272	0.22898	0.200799	0.229523	0.422732	0.090849	0.277562	0.329661	0.112479	0.370653	0.453979	0.24242	0.238561	0.152652	0.166058	0.179415	0.219437	0.156329	0.194701	0.201036	0.121483
SmE	69.5133	77.5733	71.4471	55.9152	56.4105	59.3066	66.4144	47.2567	47.556	71.7751	52.5068	45.0627	55.4068	59.6695	62.4025	77.562	59.7437	53.8847	54.0853	53.6734	51.3667	50.0996	43.6031	45.6892	53.6374	49.9327	45.3068	45.2806	59.7988	70.8812	83.9453	69.1664	64.567	57.7525
CG34132	30.2786	24.9593	24.1836	25.5454	31.1204	27.375	18.7489	21.5413	26.1155	22.36	20.0254	22.3865	28.6901	28.7109	21.8715	32.8566	19.9115	26.2373	21.3371	17.9124	26.9045	17.6115	22.8556	32.2751	30.0921	16.4891	18.2815	21.0816	29.9142	28.9931	25.7059	25.0269	34.0296	24.2649
Spn28Da	0.0911083	0	0.0835048	0.188794	0.227996	0	0.122452	0	0.0733428	0.0741682	0.0409509	0.0624539	0	0	0	0	0.0409166	0	0	0	0.0839541	0.100257	0.0471968	0.194232	0.0720262	0	0.027213	0.074007	0.0319839	0.0434649	0.0796241	0.0867724	0.0325802	0
Spn28Db	0	0.149868	0.0892686	0	0	0	0	0	0.15681	0.0792875	0	0.0667647	0	0	0	0	0	0	0.0865665	0	0	0	0	0.0346064	0	0	0.116365	0	0.0341915	0	0	0	0	0
Snoo	4.93748	6.37001	5.87422	6.32694	6.29842	7.26055	6.0908	6.28889	8.1487	6.98642	6.11382	6.42036	7.50517	8.28513	7.22716	6.01608	6.29399	6.71186	6.17315	5.65807	5.6777	5.61489	4.63816	7.28617	5.4636	6.62315	4.44074	6.06632	6.36838	7.51272	7.56646	7.35503	8.03635	6.388
CG7231	15.4399	5.82207	4.13912	4.99517	16.4937	15.6374	2.50168	5.80209	4.27408	2.28529	3.01732	5.64753	3.54181	4.45417	3.71074	3.46339	4.1933	5.88912	3.57991	8.45159	6.69197	4.83517	3.35107	2.90562	4.12498	3.60828	3.06233	4.288	4.15622	4.94941	3.14675	4.64983	3.29531	4.26481
pes	17.5096	13.5638	14.3111	13.8711	16.8267	18.6686	16.2954	18.3537	13.1024	15.3805	15.7132	17.4059	21.4287	27.1613	27.3628	20.1996	22.1584	15.5944	17.4878	16.9926	12.7802	13.8053	16.8318	21.1334	14.532	19.1924	15.4471	14.3818	21.123	22.7777	24.8337	24.556	23.8299	21.6826
CG7227	3.8711	4.77835	9.86431	5.95013	7.13243	4.5308	4.80264	3.61107	3.11626	2.49336	1.54876	3.58674	4.61707	11.6768	6.31676	1.81993	6.32357	3.7532	3.21378	3.69647	2.19515	2.99591	0.947579	1.43591	0.975266	0.992835	0.724246	2.40155	1.86671	2.76002	5.65097	3.72738	3.08805	3.74131
CR44996	0.282386	0.217258	0.388228	0.365723	0.353332	0.326917	0.616743	0.559323	0.511476	0.919522	0.47597	0.290359	0.47889	1.04545	1.03926	0.739654	0.729209	0.194644	0.50197	0.479256	0.45537	0.233056	0.475423	0.652179	0.502294	0.713985	0.337382	0.516107	0.371747	0.707267	1.20311	0.60513	1.00981	0.604108
Sirup	102.179	102.858	169.069	103.394	94.1951	82.301	103.426	72.7764	132.351	81.8849	88.4202	71.1339	122.6	192.26	139.255	194.545	138.166	126.819	128.021	124.254	219.403	102.982	120.374	46.4281	106.006	59.0621	137.386	89.0115	162.143	133.332	164.967	140.897	313.599	109.788
Wwox	6.08581	6.51954	6.07217	5.26788	5.01228	5.82667	10.4573	5.14429	7.3797	6.45935	6.44036	7.39301	5.51603	5.41886	5.07858	7.0623	6.43496	7.85873	5.54602	5.85726	7.16963	5.67967	9.29826	7.66409	7.42992	7.4315	7.66222	6.41402	6.19299	5.69645	5.45335	5.24592	8.20926	6.07938
Spn28Dc	12.0744	13.9096	17.9316	14.1827	14.4616	9.86715	164.409	292.178	82.9576	73.7464	70.9301	145.62	24.3822	29.8811	27.4	21.1407	27.3739	14.5981	20.66	15.8678	13.9227	23.8737	279.229	499.176	131.008	247.647	159.148	31.3646	24.0045	24.5815	21.2177	27.704	17.9638	26.3066
CG12560	21.8623	22.5461	18.2259	17.832	27.937	19.9248	24.6947	46.1985	28.084	23.1934	19.9668	42.7273	10.7809	14.8225	11.4623	13.5038	12.534	25.65	22.7387	13.8943	24.2176	21.4983	28.735	65.8624	39.3473	38.6304	29.6283	20.8287	11.8797	9.98602	9.65492	10.0787	18.0478	10.3934
CG34010	0.924603	1.42272	1.45275	1.36854	1.65271	1.01944	0.887638	1.19599	1.16963	1.39785	1.00928	0.814895	0.298669	0.419154	0.169084	0.634286	0.118639	0.728361	2.46537	1.97272	1.46057	1.1628	1.23164	2.01807	1.72295	1.02759	1.18358	1.07293	0.370955	0.189043	0.230873	0.3774	0.330637	0.313969
Tg	9.76247	7.68161	15.4891	8.19917	9.76289	8.79042	14.8854	12.0958	10.5976	10.2051	10.6874	13.7898	17.1691	12.5952	8.73366	10.7837	11.8742	21.207	9.86012	17.3217	10.393	11.0276	14.7312	11.5624	13.2576	13.0034	14.5134	15.9502	8.56788	8.55616	8.32185	7.64257	6.84986	12.5872
CG7367	0.141538	0	0.194589	0.513265	0.265647	0.327716	0.0951157	0.400494	0.284848	0.172832	0.127236	0.194046	0.0533402	0.224574	0.135887	0	0.0317823	1.17072	0.440298	0.0960857	0.130424	0.233626	0.109981	0.150871	0.0839204	0.165169	0.10569	0.143714	0.099375	0.135047	0.154622	0.303305	0.126535	0.269149
baf	91.1395	69.5098	110.409	166.571	129.053	62.04	115.114	81.8829	93.7834	126.912	107.934	100.969	53.5044	53.0529	177.248	77.8442	60.0485	88.3398	67.0177	74.8608	148.978	106.894	107.681	101.011	96.7987	129.036	113.421	74.3542	62.6781	52.2838	76.7324	92.1935	64.535	49.948
Cka	17.4108	15.6178	16.3156	15.026	15.0932	17.1133	16.042	17.8724	18.3211	15.1269	16.2919	16.5243	17.3304	21.0389	18.5521	15.5763	16.1292	18.5128	19.6036	16.7754	16.9429	18.8799	17.6645	20.473	17.1512	19.6191	17.152	18.6773	17.4798	20.4394	18.6193	21.0066	22.1123	17.6584
CG7429	10.0692	12.7756	10.5242	10.0666	9.72552	7.08968	10.4467	8.99735	7.82137	10.0665	9.13112	9.56641	5.59217	4.76491	5.76639	8.56009	9.28213	6.33174	10.3626	9.11421	11.0691	12.2466	9.42566	7.09267	8.72836	8.1084	11.7136	12.6993	7.62779	8.42755	8.64559	9.08527	8.27538	6.88642
RpL36A	1221.68	1081.07	1212.57	995.458	1195.96	877.738	1251.53	1358.02	657.998	1218.84	952.529	1044.69	930.819	684.71	802.83	1201.48	1030.99	1022.24	1261.1	1175.5	926.405	1485.06	1139.44	773.696	963.672	1057.26	1288.02	1296.28	944.444	1011.11	912.661	1053.02	773.683	930.845
snoRNA:Psi28S-2648	0.714244	4.39612	1.30927	1.48005	0.893689	2.205	2.39991	2.42521	1.72492	1.16288	3.53138	1.46882	1.61502	0.755512	0.457152	1.55902	0.320766	0	3.17411	0.969754	1.97448	3.92982	1.11	1.2689	1.69395	0.555661	2.13337	0.870268	1.25369	1.70372	2.49685	1.70063	1.78789	2.03731
CG7466	3.00583	3.36852	3.70103	3.74895	3.30685	4.34214	2.78221	3.18385	4.20026	3.56423	3.33938	3.2812	4.09511	4.26533	4.68266	3.28792	3.47412	4.90996	3.55876	3.00309	4.5362	3.74452	3.60779	3.28061	3.74824	3.36207	3.61834	3.66244	3.24925	3.39828	3.77686	3.46775	3.96287	3.6668
poe	89.1852	72.7937	90.2768	101.934	82.2008	70.865	70.7418	63.1306	100.268	106.694	79.4419	61.8351	67.6027	80.594	118.989	58.6111	66.7143	90.7922	69.2033	77.8235	97.9294	76.7522	83.419	77.2505	75.154	90.2057	78.6755	61.7976	55.8118	67.2305	83.771	89.8237	82.5369	64.9227
MED20	12.9432	10.4731	8.59044	10.1734	7.81827	7.06154	10.9475	7.45104	6.28754	11.7174	10.5319	7.3427	12.2785	11.6256	12.2836	13.103	12.2268	7.07571	8.92545	10.4531	7.50567	10.191	8.67019	6.22434	7.85064	11.5451	8.53182	10.3324	12.2211	13.6271	15.1635	17.2156	14.8829	12.2533
Trf	2.7073	2.71683	2.26559	1.7074	2.65107	2.36202	2.61036	3.33066	2.08464	1.91645	2.32791	2.33996	1.50823	1.55637	1.7328	2.41513	2.06165	1.6227	1.98777	2.23744	2.38624	4.01537	3.17078	1.92387	2.60555	3.66295	3.16424	3.20308	2.0661	2.80776	2.52035	1.90581	1.76788	2.5741
Mcr	12.3684	13.7717	14.8903	21.0216	16.7405	14.8649	15.129	14.7061	18.2711	16.7412	17.446	20.1189	15.3756	18.9149	20.3614	12.5077	12.6196	15.5559	14.7499	14.3476	19.8815	15.4911	19.2786	20.6345	15.5167	21.1603	16.7423	17.7349	14.3097	13.4231	15.5153	16.1906	17.1725	13.7693
CR45257	0	0	0	0	0	0	0	0	0	0	0	0	0	0	0	0	0	0	0	0	0	0	0	0	0	0	0	0	0	0	0	0	0	0
Bsg	98.0789	94.7718	99.9648	117.303	105.009	108.692	67.8115	58.3636	90.988	86.202	70.6121	59.1829	81.5628	117.327	95.5957	83.7999	80.8458	82.8138	79.9649	72.3305	103.173	66.5413	50.5198	63.991	74.6962	80.6114	58.2017	65.3859	88.0688	84.7067	120.012	108.703	144.973	90.2995
mon2	16.4414	16.5286	15.3433	20.7516	20.7217	17.0115	17.0219	18.9472	16.2996	18.1703	20.8711	21.366	17.1689	15.6311	28.2152	15.1728	16.5576	17.5281	13.7983	18.1561	20.3657	16.952	20.3688	20.5845	16.7396	25.3027	25.7746	18.1227	14.384	15.6208	16.9467	17.7753	15.7283	14.4482
CG8673	0.247238	0.126811	0	0	0.103118	0.127212	0.22153	0.186555	0.4644	0.134179	0.222255	0.282466	0.0621163	0.479459	0.105497	0.179887	0.222069	0	0.0732486	0	0.379707	0.0906882	0.341538	0.204976	0.423487	0.256459	0.246158	0.167359	0.173588	0.157266	0.108037	0.156981	0.0589414	0.235074
CG12375	81.0449	90.7789	81.3817	69.5637	63.1305	57.3377	99.7826	65.5369	83.551	95.0021	81.6052	59.4363	59.3636	60.5661	51.1735	63.3029	60.8403	74.758	70.4439	81.9887	61.5935	65.2479	48.2606	43.7238	73.846	72.2454	68.6464	59.0153	65.8978	62.4974	95.0031	73.8299	76.3608	66.245
CG8668	20.0104	19.9364	17.6807	18.5699	26.1636	23.3326	15.6723	19.3896	15.9636	18.6336	18.9428	21.3402	33.0942	23.2413	27.8036	21.886	31.7603	19.1512	13.3709	22.5755	20.6279	17.7029	28.4505	22.5191	15.5348	20.1873	28.0247	17.3068	21.0236	19.7108	19.2652	18.6125	16.5765	19.5221
CG8552	45.7471	45.4523	37.7455	60.0792	65.7666	36.2521	58.918	56.1959	55.9458	47.9315	55.3083	56.2902	41.449	44.9964	48.896	37.0178	35.0884	59.5088	37.0733	63.7293	39.3964	44.6443	49.5815	96.4695	59.204	67.3841	64.0377	64.6476	38.1926	42.6549	45.9865	45.1688	53.1524	37.8196
mir-4984	0.940711	0	0.862204	0.974668	0	1.45208	1.26434	0	2.27184	0	2.11413	1.2897	0	0	0	0	0	0	0	7.66342	0.866843	0	0.487316	3.34247	1.48737	0.731846	0.56196	0.382069	0	0.897569	0	0	0	0
CG42762	0	0.300241	0.178838	1.21299	0.732433	0	0.393375	0.883382	1.2566	0.158842	0.350811	0.267509	0	0	0.374664	0.0851808	0	1.07596	0.6937	3.17909	0.539401	0.429431	1.31403	1.59458	0.539893	0.758997	0.524527	0.792486	0	0	0.0852636	0.185836	0.0697755	0.0927612
CG42763	0.701258	0	0.803417	3.45121	2.41296	0.541228	1.41376	0.992132	2.54033	0.713588	0.866794	1.68247	0.132138	0.370888	0.44884	0.0765337	0.0787334	0.966734	1.09074	2.38031	0.80774	2.50794	1.72554	1.68187	1.45526	1.2275	0.837831	1.28167	0.246179	0	0.153216	0.166971	0.250769	0.0833446
CG43394	1.97898	3.00657	3.71948	4.04891	4.921	7.1535	4.59573	4.19621	9.59888	3.91539	13.9393	4.43032	12.4237	11.9372	5.56361	7.45818	10.3388	16.8524	3.65142	11.1899	3.53174	2.72901	7.5006	3.53358	10.2781	6.3922	5.40967	7.244	7.02642	4.44568	5.1229	5.34423	8.12488	10.1107
CG31606	0.83846	1.5482	2.61285	9.38224	3.77681	1.29424	0.563457	1.89799	3.91481	1.36512	1.88434	1.95417	1.26393	1.8625	2.14663	1.83015	1.28027	3.23646	0.29809	1.13841	3.8631	4.61327	1.38991	0.476665	1.45827	1.95689	2.55447	0.681079	1.17738	0.720006	1.68538	1.11798	2.87839	1.19581
Rbsn-5	7.58429	6.8478	6.4343	7.27358	7.99963	5.22464	7.07648	7.09434	7.77053	7.04156	8.02935	8.46443	6.89753	6.66332	6.94048	8.3731	6.61514	6.04863	7.29804	6.04231	6.69995	7.31126	7.53307	9.53201	7.58148	10.5816	8.49972	7.40812	6.68924	7.17666	7.20348	7.73078	6.52257	6.4066
CG8498	56.6416	51.2085	56.9646	63.4815	60.9445	51.3703	50.0607	62.612	57.484	47.7247	49.0358	48.4963	54.8185	61.4296	56.4256	53.4949	56.1212	63.8044	55.4362	53.2644	50.5691	57.7212	43.3851	52.7021	54.6226	38.9216	41.8018	60.7795	63.2118	59.0908	56.0508	64.6512	67.7793	52.7023
Piezo	10.9134	7.5616	15.8551	26.2361	15.2088	9.34095	15.7758	12.5293	17.554	15.5772	15.4241	20.1974	8.09201	10.8763	11.9869	7.45158	6.87856	16.4258	11.2949	12.3102	18.9496	17.394	18.8576	17.583	11.7661	21.721	17.6012	13.539	7.66607	8.49659	10.6229	9.62892	9.55511	7.7923
CG34134	33.8772	34.8743	31.05	19.7747	20.2987	26.1464	58.5182	46.7141	34.5694	50.6897	40.8555	23.059	35.0643	32.8063	25.9587	41.7637	31.3927	24.9955	36.4715	24.2938	20.6648	30.1908	20.8863	36.9587	38.5696	50.4838	31.7814	34.6887	41.7921	33.1203	46.3913	49.42	36.1728	34.1386
CG8475	250.493	259.547	188.743	204.393	166.914	203.027	226.31	190.652	263.842	274.661	187.396	134.595	216.183	253.598	232.423	198.022	196.259	208.433	224.637	238.603	187.241	163.464	147.646	202.292	224.58	216.91	151.534	154.006	203.673	249.69	296.381	300.396	307.085	230.218
CR44116	0.36429	0.210204	0.500832	0.849238	0.17093	0.281158	1.04043	0.721551	0.989739	0.667251	0.777761	0.686723	0.377538	0.337171	0.408036	0.318062	0.184052	0.502199	0.526145	0.680087	0.419605	0.350761	0.401015	0.80898	0.395988	0.708516	0.326428	0.443867	0.431613	0.217239	0.497455	0.368638	0.390809	0.238127
CG8460	8.96564	6.37726	8.37245	9.90271	8.0432	12.142	6.47975	10.3391	9.19198	4.95756	8.05967	8.81294	10.2001	7.60482	6.98359	10.228	8.35679	8.62852	8.87079	6.54584	9.5866	7.3529	7.97446	8.05418	8.4586	6.18538	8.48855	7.45453	10.1252	6.33514	6.94848	6.92784	8.68068	6.23256
PGAP5	3.32412	5.65906	5.18587	6.30198	6.28314	5.89529	5.94109	6.40398	6.88912	5.23937	6.0718	6.59354	4.58446	7.44382	5.97539	6.20596	5.90789	3.90003	5.21748	5.66559	6.06101	4.43618	6.08192	6.30758	5.03215	5.72235	6.92901	4.79711	5.214	6.20837	5.34664	5.5572	7.56216	5.71593
SLC5A11	32.2763	17.9381	33.6493	26.4556	25.0912	40.6898	23.9702	23.8783	36.4178	22.3444	28.2914	31.9055	37.9008	34.9004	29.6791	31.6746	25.2983	46.534	15.5421	27.6402	30.9844	13.8814	16.4947	20.788	19.4295	15.7699	21.8537	13.745	29.4415	25.6288	26.4781	18.498	64.4919	24.4225
CR44119	0.662764	1.01982	1.01242	1.08725	0.621957	1.02304	0.927888	0.687626	1.55613	1.48372	0.794389	1.62797	0.666053	0.642636	0.424202	0.723325	0.545684	1.21822	0.785421	1.2748	0.559827	1.0332	0.972771	1.56992	1.55002	1.24606	1.12177	0.897269	0.872496	0.737763	0.917102	0.762727	0.967765	0.735182
CR44120	0	0	0	0	0	0.633352	0	0	0	0	0	0	0	0	0	0	0	0	0	0	0	0	0	0	0	0	0	0	0	0	0	0.195392	0	0
CR44121	0	0	0	0	0	0	0	0	0	0	0	0	0.326634	0	0	0	0	0	0	0	0	0	0	0	0	0	0	0	0	0	0	0.206369	0	0
CG8419	0.0714244	0.109903	0.163659	0.0740025	0.0893689	0.330751	0.119995	0.121261	0.0574972	0.14536	0.0802587	0.171363	0.161502	0.151102	0.137146	0.155902	0.176421	0.196927	0.0952232	0.0969754	0.0658158	0.0392982	0.0185	0.076134	0.0423487	0	0.064001	0.0290089	0.150443	0.153335	0.218475	0.0340126	0.0893945	0.0679104
Su(var)205	39.1256	39.8148	41.598	39.4569	33.0286	42.8395	39.6848	39.6781	41.0713	35.4181	35.4534	32.971	30.9053	33.9367	26.5783	39.763	33.2682	33.9446	36.7223	32.44	36.0533	35.9361	32.7534	38.8139	33.9416	32.062	32.5972	35.8921	35.9313	31.2089	34.6042	32.1958	39.6606	28.5205
Ssb-c31a	48.3554	44.8428	49.4641	51.2192	49.1596	59.313	44.9714	41.7806	52.655	59.0467	47.6413	39.5102	41.9786	64.6216	58.4455	54.376	52.1579	44.0441	40.6759	38.6888	42.3702	40.8584	35.2259	37.5074	47.0166	42.1535	33.4644	34.4568	57.8222	52.0079	70.3707	59.2124	74.185	49.0551
CG8372	33.0784	30.4981	28.2312	22.7558	27.1458	24.1861	23.3991	25.1616	18.1116	28.3453	22.9339	21.6651	24.6291	25.8527	21.1718	27.0685	30.0116	28.0621	30.3524	28.1835	25.4214	26.821	24.6975	21.6982	22.0213	23.2336	25.3204	28.3925	26.6566	32.2642	29.8452	31.1216	27.2494	26.294
CG8360	62.1909	60.4033	66.5683	65.5021	51.1413	50.3817	63.9248	70.5561	56.337	66.4262	51.1486	47.8721	64.2726	61.974	63.3309	59.177	65.6979	53.9135	54.8834	63.0796	44.437	65.0383	49.2771	53.7543	47.8288	55.703	59.0647	63.5351	63.9487	68.8077	72.9188	67.5628	63.2483	65.0024
CG8353	30.4433	26.0636	33.5671	26.2061	28.0677	26.4993	40.9167	32.5137	33.9967	32.05	32.5627	27.4587	25.4474	26.0887	21.6828	20.5346	22.1528	17.3553	20.3444	24.3964	23.9398	21.284	16.9563	30.9461	26.691	28.2249	25.946	22.1725	24.7896	18.564	24.0554	25.561	24.024	24.7561
CG8349	0	0	0	0	0	0	0.0837899	0	0	0	0	0	0	0	0	0.0544313	0	0	0.11082	0	0	0	0	0.0443021	0.0492852	0	0	0	0	0	0	0	0	0
CG8292	2.30368	1.77237	2.30337	2.27834	0.917144	1.77797	2.25179	2.60738	3.0346	2.21632	2.35329	3.94788	5.209	3.98746	3.21702	1.50851	1.50484	1.73225	1.39603	0.853032	2.31576	1.95887	1.89855	2.93925	1.82119	2.85122	1.62638	1.99886	2.49966	1.4487	1.64725	1.74526	1.94715	2.48902
Snx6	29.1016	31.1893	32.3802	45.8206	43.648	36.2899	40.9495	44.7326	36.675	39.6223	40.6122	44.8197	39.4151	39.3526	41.5639	35.3946	30.2196	29.432	29.9882	34.1635	40.6931	39.9249	37.7546	42.9185	33.6808	53.5851	47.9217	41.704	43.6309	34.739	29.3761	31.2871	39.3092	34.0738
Pvr	13.6004	15.2539	14.3782	15.4247	17.953	17.5035	19.1792	20.3342	15.2046	17.6409	18.386	21.5787	18.0767	19.804	17.2651	14.6306	18.1831	15.3925	15.9989	15.6793	17.0999	14.6981	21.5866	23.9704	16.4028	24.8687	21.5581	21.2969	20.3067	15.7313	16.0203	14.1871	15.3989	15.916
Spn28F	0	0	0	0	0	0	0	0.107965	0	0	0	0.130777	0	0.100901	0	0	0	0	0	0	0	0	0	0	0	0	0.0284918	0	0.0669737	0	0	0.0908499	0	0.0453482
CR43262	0.361586	0	0	0	0	0	0	0	0.291079	0	0.162524	0	0	0	0	0	0	0	0	0	0	0	0	0.128476	0	0	0.108002	0	0	0	0	0	0	0
CG14277	0	0.262213	0.156187	0	0	0.263042	1.71776	0	0.411541	0.277448	0.382972	0	0	0	0.43628	0	0.459181	0.939682	0	1.85096	0.314055	0	0	0.121097	0.134718	0.397719	0.101798	0.207634	0	0.569077	0.0744643	0.0811494	0	0.32405
CG43057	0	0	0	0	0	0	0	0	0	0	0.0901346	0	0	0	0	0	0	0	0	0	0	0	0	0	0	0	0	0	0.0703978	0	0	0	0	0
CG8086	6.15445	7.34945	11.3163	11.3253	8.45658	8.9463	12.1666	7.6923	10.5775	7.14635	11.413	10.2753	11.7534	13.3396	12.7116	10.1453	11.4882	20.9767	7.70175	10.3042	11.2032	9.51467	13.4667	6.71455	12.2308	11.7497	15.2813	18.9849	9.55676	11.0599	9.86642	10.7702	13.9003	13.5252
Btk29A	6.16884	8.74229	9.80344	16.8757	10.0455	8.49276	14.7033	18.6092	13.0808	14.0841	13.1259	14.6553	3.49928	5.29076	5.15504	4.83735	4.3313	8.80475	7.3751	7.64431	8.49711	12.6028	19.991	32.0441	11.1832	11.953	15.1925	13.1576	4.37171	3.99533	2.89738	3.48729	5.85202	4.17037
mir-2b-1	0	0	0	0	0	0	0	0	0	0	0	0	0	0	0	0	0	0	0	0	0	0	0	0	0	0	0	0	0	0	0	0	0	0
CR43752	0	0	0	0	0	0	0.152764	0	0	0	0	0.467484	0	0	0	0	0	0	0	0	0	0	0	0.242313	0.269568	0	0.0678989	0.092327	0	0	0	0	0	0
wol	22.2748	23.0722	16.6028	21.7318	28.6302	26.8911	24.3464	33.0592	21.3502	30.6923	36.4638	33.0337	33.4473	27.0456	29.457	29.5506	34.7595	23.8968	17.4098	23.5356	19.9666	24.13	28.2413	25.1602	26.9281	32.1634	41.0584	30.8368	29.9094	29.3162	23.4059	30.7077	24.4542	29.0076
Scgalpha	5.09755	3.65326	4.09612	4.41336	3.05807	3.77259	3.33177	2.9243	4.38464	3.06968	3.20144	4.73888	1.1579	1.92047	1.69839	1.46324	1.88162	2.69542	3.91007	3.98202	4.69727	3.68839	3.00242	4.49085	3.17424	2.87924	2.5863	3.48842	1.61792	1.29923	1.70877	1.42989	2.44715	2.05821
CG7840	9.00837	10.6271	7.1557	9.02242	8.39109	11.4332	6.45733	13.9345	7.49353	7.90379	10.3475	9.26273	7.92144	9.10535	10.1863	13.1961	9.21508	11.3148	7.47288	7.74629	10.3301	7.0492	11.0961	11.594	9.09985	10.8238	13.0648	8.33379	11.1739	8.69073	7.5667	5.8151	8.55456	7.28039
Ostgamma	54.9262	50.7672	55.7939	56.5237	70.7027	70.0076	60.6443	70.6876	48.9294	56.0622	60.8636	68.1676	46.7929	47.5809	49.5508	51.1208	60.3534	46.3799	47.4969	50.0954	43.0769	61.2598	54.1144	53.1324	59.6597	59.216	60.6822	62.0931	43.0339	53.0279	39.1088	52.2237	43.9359	44.2268
CG7818	9.21055	8.35168	8.3665	8.94658	8.02605	7.74337	7.2949	8.09783	8.34138	7.96662	7.35574	7.15934	6.44632	7.00258	7.10583	8.07765	6.68478	9.74979	7.82089	9.1558	9.24509	9.23047	10.0113	8.99972	9.45939	7.99725	8.35151	7.3481	6.8421	7.80732	8.22924	7.67569	9.08703	6.48986
CG7810	6.92492	7.68821	5.62392	8.26474	7.56792	9.74211	6.65647	7.14335	10.2319	7.92082	6.02816	4.62679	10.7032	15.7164	12.7919	10.906	9.99914	8.7006	6.77816	7.61698	6.78501	6.46277	6.13022	9.25028	6.68725	7.63781	5.41972	5.26907	10.4626	10.3292	14.3257	13.2742	14.7954	10.9598
CG7806	12.7064	11.4947	12.7978	19.7717	16.2191	14.9077	13.168	18.4379	13.5259	14.5117	15.6692	16.8938	16.6635	18.3269	19.1998	14.091	16.649	16.6826	12.2449	12.07	16.9411	13.086	18.1556	27.2291	15.7208	20.1687	17.315	13.2609	15.5387	14.1221	17.2063	13.631	17.3596	14.648
mtsh	0.183081	0.42257	0.125852	0.37938	0.286348	0	0.0615167	0.259022	0.626373	0.335341	0.329162	0.533378	0.0689963	0.0726224	0.175772	0.0199811	0.102777	0.378586	0.162723	0.186432	0.168705	0.0503664	0.260814	0.260205	0.235196	0.213648	0.232409	0.130127	0.0964071	0.109178	0	0.0871843	0.0491023	0.108796
CG7787	12.2483	13.8344	16.6003	16.3356	19.5645	19.1076	10.858	12.9782	16.0487	12.6228	11.1278	9.19999	11.9817	14.1276	12.0929	14.6758	13.9273	15.8074	11.2338	11.4994	20.1717	11.901	16.875	19.445	14.8335	10.1371	15.8402	12.4895	13.4484	13.5515	10.4197	15.3264	14.5378	12.2032
CG7781	10.2799	16.3573	8.67253	20.2127	15.0551	15.0566	9.49884	7.27196	27.4123	14.4072	20.6088	31.7506	12.4588	17.2376	20.6362	9.1794	15.8174	11.756	16.0413	11.4197	19.2145	14.783	13.3738	12.1615	16.6924	11.3146	9.47318	11.6478	11.6876	14.2947	12.4298	11.4596	12.3859	18.0766
CG14275	7.11317	15.3233	13.365	17.8107	14.0921	12.8098	13.6234	15.9676	10.9751	16.6962	15.0268	13.5716	17.067	25.9583	26.1026	24.4798	20.6578	12.7478	25.2888	8.69202	17.042	11.8716	8.41369	18.9555	10.4501	15.3103	12.2874	24.2195	19.6439	20.0215	16.9401	28.4535	25.1822	23.8967
CG14274	0.719574	0.885785	0.395713	1.41654	0.990394	0.777511	1.16055	0.732993	4.05484	1.40587	3.42837	5.4752	1.30166	0.951437	1.0593	0.659675	1.93896	0.396794	1.53494	0.781593	1.59137	0.554281	1.15556	1.53404	2.98653	0.503827	0.515829	1.63662	0.83361	1.16717	0.628872	0.548263	1.02928	2.53144
CG14273	0	0.839033	0.0999539	0.112992	0.409362	2.86173	2.85818	2.96237	1.66801	1.86434	2.59793	3.43879	2.38372	0.230712	1.39601	4.14191	9.84427	9.3211	0.387714	3.55363	0	0	3.55911	7.36225	5.99189	2.54525	4.85346	3.0119	1.41652	5.46282	4.14593	0.259663	1.36493	1.34797
CR45371	0.357122	0.219806	0.654636	2.51609	1.78738	0.551251	0.575978	0.565883	0.517475	1.0466	0.706277	1.46882	0.0538341	0.113327	3.0172	0.467706	0.673608	0.984636	0.634821	0.678828	1.90866	0.471579	1.295	1.09125	1.55279	1.27802	1.28002	0.667205	0.150443	0.238521	1.18601	1.25847	0.255413	0.407462
CG7778	5.80688	4.96402	8.03268	6.35074	7.26579	8.79748	47.5142	60.6123	26.0565	12.7371	18.2945	26.6477	13.0087	20.56	18.8244	18.9421	25.1369	11.5631	10.3223	11.6803	6.29226	9.46663	80.1612	49.0597	43.8238	71.3192	82.5309	15.4173	21.0082	16.7243	16.0941	16.8988	19.2079	30.98
Mur29B	17.6878	2.36256	0.450323	1.71808	8.45305	24.4587	14.2389	20.1586	11.4701	9.69934	30.3102	7.15701	9.48955	7.24353	6.68257	9.11579	20.2174	27.7705	3.22061	44.6952	5.60273	0.743412	19.5664	20.9053	14.6144	3.48792	16.7116	14.8916	7.15801	4.48284	2.03963	0.233972	9.15826	16.3796
CG7627	23.3449	18.5197	28.4993	63.2039	41.997	18.1671	22.3442	16.9937	21.0152	30.0244	36.1485	28.536	15.5878	17.5725	83.7925	30.2672	13.1813	39.8611	18.446	16.8016	64.156	32.2979	43.92	26.0975	31.0814	40.7884	35.971	26.7331	14.5798	14.5568	23.4182	21.6689	19.147	13.9533
RpS13	829.773	758.711	874.479	742.108	825.184	680.449	792.015	879.583	443.555	710.905	599.158	752.668	652.678	534.975	574.84	815.612	709.694	757.278	848.467	788.471	649.811	1010.25	779.285	574.018	653.947	718.133	854.056	889.392	718.32	703.729	643.011	687.806	611.126	728.619
CSN8	24.1885	24.7204	22.997	27.4929	24.3931	28.9781	18.6811	20.2265	23.686	21.6013	20.3649	20.4169	14.1497	23.2948	24.8402	21.1978	16.7809	25.8801	19.0922	16.4208	25.4495	23.0419	18.9825	23.5386	20.7634	16.0093	15.7976	18.7685	17.8701	16.5343	19.8774	22.0918	31.9525	16.6481
Pp2A-29B	135.685	123.345	131.708	136.93	122.985	103.134	126.916	120.891	113.957	118.724	113.881	106.705	105.969	104.724	128.051	102.582	100.517	110.854	123.021	121.201	118.146	140.442	124.554	127.87	117.27	132.887	136.863	118.722	100.098	124.156	124.248	130.227	114.691	105.466
CR45341	0	0	0	0.3655	0	0	0	0	0	0	0	0	0	0	0	0	0	0	0.31354	0	0.325066	0.38819	0	0.125343	0	0	0	0	0	0.168294	0	0	0	0
CG17292	16.7523	18.4123	16.5785	15.627	17.7577	19.5873	15.5589	12.7875	12.276	14.9514	10.1814	15.9472	19.7998	19.9278	17.9892	19.7773	17.4213	24.0916	20.9244	16.3977	22.9757	17.1483	11.9937	8.83945	13.0896	12.8596	12.9332	20.5021	20.4368	22.4891	18.0211	21.3352	22.6687	20.6906
Wdr82	25.0753	19.1286	25.5146	19.3752	19.0112	12.7927	19.4214	20.2034	15.3104	20.0669	18.8641	14.3483	13.5342	13.3744	11.561	15.6314	13.4563	19.6276	25.0256	24.0916	18.015	27.944	18.0535	15.0632	17.9755	19.3425	19.7715	18.4267	14.3604	15.9164	16.1109	20.6437	15.806	14.9515
CG13390	20.5075	14.1855	16.8992	14.3276	12.3591	15.8276	25.4765	16.8227	11.8893	23.6633	21.987	10.511	20.6329	13.7319	15.7149	20.862	18.0818	17.1183	21.8224	16.9873	14.9097	18.1155	16.52	10.6291	14.8365	21.2235	18.4042	16.3143	17.2385	21.5416	19.649	22.7569	17.9973	16.8153
CG17294	118.337	123.68	110.348	122.727	118.598	118.423	99.0403	77.3863	149.106	120.069	105.403	78.4543	28.0076	42.511	41.7128	33.8412	29.7818	109.073	85.1589	94.229	115.156	100.779	69.9496	89.8216	115.969	93.0413	86.1281	72.6278	32.8328	34.5821	47.5636	40.1275	50.1265	33.4828
Aats-ala	18.6103	18.7841	19.0886	23.8383	23.2859	17.5401	25.0128	35.2389	17.0771	19.0163	25.1262	30.3858	20.9477	17.6389	22.6296	21.9926	21.4555	22.0182	17.7291	18.6285	18.7698	25.6278	33.4599	28.7874	24.3771	29.3123	36.1682	26.5049	20.0195	21.1806	16.2337	19.601	12.9201	21.9929
CG13392	9.66321	8.30351	8.39667	6.24126	8.00831	9.87947	5.81913	6.10775	6.3646	9.09244	6.59967	6.88212	8.7968	7.89846	6.02429	9.47789	6.31233	5.53617	7.5848	6.98601	7.74799	7.04299	6.63109	7.71414	8.13536	5.36978	7.68428	5.19895	8.45873	10.2378	10.529	9.44238	11.9822	7.81559
Rcd4	36.7801	25.5041	30.6723	29.2759	31.7997	22.417	28.5357	21.0825	27.0668	33.9251	25.2588	28.6751	20.8212	27.217	25.4608	22.8097	21.4095	24.808	20.9049	24.8617	23.4189	33.0041	16.7635	22.996	27.8288	21.9823	19.8499	19.1696	25.0478	25.3034	32.282	31.1209	29.9742	24.7646
l(2)k12914	47.7348	52.8035	53.2272	59.4862	66.3335	40.7465	58.3917	57.5135	50.8227	47.2759	63.7737	63.6341	39.958	43.9777	44.4915	46.575	47.4197	44.2749	43.4044	49.2805	47.8379	60.0321	44.67	51.1951	49.3886	48.9446	51.6437	56.4648	41.1601	52.262	35.2776	51.9579	42.0849	38.798
CG13384	22.6917	18.7251	21.571	84.3059	49.4988	19.5282	46.719	26.8651	52.5378	29.6214	35.3999	73.2597	30.0896	31.0974	35.3198	33.2949	20.9047	31.116	21.8461	30.3185	46.0757	54.0065	37.2414	44.1234	51.166	60.2717	47.0844	34.7606	49.3046	20.4822	26.7461	22.109	33.5352	21.1552
CG42819	0	0	0	0	0	0	0.128737	0	0	0	0	0.131319	0	0	0.122614	0.0836295	0	0	0.170267	0	0	0	0	0.0680668	0	0.149035	0	0.0778054	0	0	0	0.0912259	0	0
snRNA:U6atac:29B	0	0	1.09331	0	0	0	0	0	0	0	0	0	0	0	0	0	0	0	0	0	0	0	0	0.423839	0.471512	1.85602	0.356294	0.484479	0	0	0	0	0	0
CG42820	0	0	0	0.10087	0.182723	0	0	0.0550953	0	0.0396271	0.0437591	0.0667366	0.0366896	0	0.747752	0.127502	0	0	0.129795	0.0660918	0.0448556	0.0535659	0.0504332	0.0172959	0.0192413	0	0.0581582	0	0	0	0	0	0	0
Acp29AB	0	0	0	0	0	0	0	0	0	0	0	0	0	0	0.579337	0	0	0.415935	0	0	0	0	0	0	0	0	0.0450594	0	0	0	0	0	0	0
lectin-29Ca	0	0	0	0	0	0	0	0	0.117608	0	0.0656662	0	0	0	0.280525	0	0	0	0	0	0	0	0	0	0	0	0	0	0	0	0	0	0	0
CR45343	0	0	0	0.132615	0	0	0	0	0	0	0	0	0	0	0	0	0	0	0	0	0	0	0	0	0	0	0	0	0	0	0	0	0	0
Peritrophin-15b	2.4331	0	0	3.36124	1.0148	0	0.545026	1.52992	0.217629	0	1.94421	1.85319	2.44518	0.285965	0.692136	0.472077	1.57835	0.745379	0	0.367056	1.99293	0.594982	2.1007	1.92114	1.06861	1.89288	1.69573	0.2196	2.94207	0.386919	0.236268	0.643697	0.096675	0.514088
Peritrophin-15a	80.1298	6.9047	0	21.9179	34.0889	4.45277	2.58472	13.0599	2.32218	4.69663	7.49141	17.5771	14.4949	1.35615	1.84634	2.93838	6.18962	0.883718	1.42439	19.5831	49.6189	1.41082	1.66038	6.26366	6.20802	10.9716	6.41428	4.03553	12.2646	2.44656	0.280118	0.152633	0.687704	1.52375
CG13385	0	0	0	0	0	0	0	0	0.0752386	0	0	0	0	0	0	0	0	0	0.0830703	0	0	0.102848	0	0	0	0	0	0	0	0	0	0	0	0
CG13386	0.587945	0	0.431102	4.14234	1.61845	0	1.02728	0.399273	1.60922	0.574351	1.00421	1.93455	0.0886293	0	0.0752628	0.102667	0	0.648419	0.31354	0.638618	1.9504	2.58793	0.730974	1.00274	0.790165	2.74442	2.38833	0.382069	0.28896	0.112196	0.0513834	0	0.0420497	0.223607
CG31898	0.691086	0.607654	0.904873	0.818322	0.988243	0.761968	0.464419	0.558709	0.874232	0.32148	0.488127	1.15049	0.595299	1.72311	0.758279	0.732686	1.06411	0.544406	0.175497	0.402133	1.18266	0.10864	0.818292	0.87697	0.819513	0.384032	0.442328	0.400977	1.31702	0.75359	1.42365	0.423126	0.882613	0.844824
fy	3.08462	1.89856	2.70154	1.91758	3.08768	3.17427	2.39536	4.03436	1.82097	1.33925	2.24915	1.78556	1.91162	1.70393	2.3253	1.79546	2.15491	3.40189	2.07144	2.32672	3.0319	2.56463	2.41464	2.67912	2.2489	2.07978	2.23169	3.03459	2.11761	1.864	2.96538	2.57875	2.01001	2.63957
CR44991	0	0	0.255545	0	0	0	0	0	0	0.226972	0.12532	0.191124	0.210148	0.147461	0	0.121716	0	0	0	0	0	0.30681	0	0.0990659	0	0	0	0	0.0978784	0	0	0.132772	0	0
emb	40.7758	38.7635	40.9614	40.4062	39.2885	38.6475	33.045	35.5683	43.6282	35.2282	36.6554	35.7383	28.3068	37.5053	31.5227	29.8328	26.4332	38.0667	35.1427	32.6651	38.8794	37.1604	36.9887	47.7387	38.029	36.8925	34.6452	34.0427	29.5152	29.6401	33.4524	33.7815	36.0436	28.5078
CG13397	7.7351	10.6752	4.82383	6.81629	9.22945	10.155	3.21532	7.67176	3.78744	5.03101	4.0323	6.9969	8.35449	11.5139	14.0614	13.7333	9.06058	7.14557	9.81632	5.73832	7.71556	6.62518	6.13444	7.50846	5.87862	6.35889	6.35952	7.87019	11.0437	9.83413	11.6908	7.29103	11.8057	11.79
CG13398	9.62644	11.2411	9.52053	8.39701	9.14085	10.748	5.72758	8.95757	9.95471	6.75245	6.3278	7.35523	8.4028	10.9675	10.3989	9.31843	9.68879	8.18274	8.18399	9.35058	9.99249	8.91828	7.41118	10.2206	8.10656	6.24584	7.03485	7.20139	10.058	10.7823	9.75977	11.3789	11.4429	9.189
Akap200	33.9665	31.3771	43.0933	62.3566	50.6284	44.8312	30.5782	80.4496	32.8073	34.7179	39.5295	44.9899	22.5274	39.9503	30.8205	27.7359	33.0205	40.962	45.9315	32.393	59.8069	64.6569	73.2498	96.2083	36.6054	80.5213	73.4368	50.3782	27.499	30.5187	25.8153	38.648	30.116	31.6029
grk	220.302	183.846	287.659	319.389	231.577	123.194	223.314	143.539	198.164	183.891	215.205	150.646	129.091	167.987	241.574	132.867	146.243	248.644	194.608	193.769	307.329	264.139	212.092	230.425	185.662	234.683	221.002	158.299	130.89	177.426	204.188	215.142	175.43	146.356
D12	2.02871	1.86203	1.72892	1.95443	2.09306	1.64816	2.15261	2.45729	1.89099	1.97021	1.53575	1.24428	2.41434	2.07063	2.55139	2.50153	2.07792	2.06074	2.46743	1.98127	2.65652	1.9191	2.2678	2.4154	1.89924	1.96592	1.80723	2.09603	2.24901	2.49599	2.03738	2.23724	2.04912	1.97966
Chrac-14	8.20898	9.02243	8.06132	8.91031	7.09215	7.54246	6.43597	8.18509	7.70967	6.36443	4.91964	4.95728	6.62924	8.57991	5.50435	8.53247	8.60216	4.31111	9.7282	8.22653	6.30364	6.66742	5.16374	4.72237	4.78998	5.32195	5.25413	6.3506	9.46875	9.88387	12.3841	10.2383	10.0646	7.71219
mus201	1.43536	2.25371	2.22842	2.70119	2.23581	2.12518	1.73231	1.95613	1.98081	1.83618	2.05397	2.12849	2.05333	1.9366	2.41862	2.12279	1.59181	1.69607	1.79646	1.98861	2.05145	2.12748	2.47347	2.1545	2.32736	1.80034	1.63616	1.95116	2.01555	2.13814	1.89445	1.85528	1.94838	2.01926
CG31897	0.0686895	0.317084	0.062957	0.533767	0.12892	0.265072	0.161561	0.62196	0.24883	0.307548	0.370491	0.517947	0.258864	0.127152	0.285771	0.254885	0.092545	0.189387	0.244205	0.139893	0.221535	0.11338	0.195708	0.19525	0.0678786	0.213754	0.133359	0.139491	0.180853	0.131079	0.225117	0.212617	0.257915	0.277568
U26	5.15679	5.80856	4.54107	4.05085	5.52458	6.3992	4.12228	4.50144	5.83346	3.75896	3.62069	4.04322	3.73436	4.84866	4.07721	5.44408	3.25437	4.92519	4.67323	4.6677	5.18666	3.63471	4.33006	4.98187	5.11589	3.12031	3.89599	3.874	4.14123	3.26411	4.90443	2.85694	5.41166	4.59864
fu12	11.673	9.35324	12.1779	9.97641	8.4807	16.4407	11.6401	7.36696	13.4673	11.4293	15.2565	14.0491	6.81148	13.7984	15.1491	11.9529	8.93849	5.78422	7.076	5.9159	6.84044	12.2532	4.23564	7.14831	7.61214	12.178	7.85686	12.0599	9.80081	10.3934	12.3171	15.9333	9.40646	10.357
fu2	4.19971	4.80525	3.75053	4.01659	4.64851	4.32177	3.76302	3.47362	4.50774	3.24352	3.17031	3.4694	2.71901	3.55959	3.20495	3.87832	3.26438	6.53186	4.45054	3.50898	4.81261	4.85842	4.01645	4.11315	3.80961	2.93215	3.57024	3.87065	3.19437	2.95396	3.52917	2.61529	3.36945	3.22519
d	0.264993	0.174752	0.503105	0.392227	0.33157	0.292173	0.445198	0.299928	0.289508	0.169496	0.212693	0.350326	0.442262	0.380413	0.629976	0.594942	0.44203	0.730625	0.55517	0.436889	0.226743	0.312431	0.16669	0.107606	0.306756	0.161981	0.192223	0.691886	0.245857	0.433441	0.388742	0.585888	0.392583	0.557903
CheA29a	0.16867	0	0	0	0	0	0.113348	0.190906	0	0	0.151626	0	0	0.0892077	0	0.073633	0.0757493	0	0	0	0	0	0	0	0	0	0	0.068505	0.177636	0.160934	0.0737045	0.0803214	0.241265	0.160371
CG43796	0.183081	0	0	0	0	0.282603	0	0	0	0	0	0	0.137993	0	0	0	0	0	0	0	0	0	0	0	0	0	0	0.148717	0	0	0	0	0	0
unsRNA:d-a	1.15132	0.885785	0	0	0.720287	0	1.16055	0.651549	0.46341	0.468625	0.258745	0.394609	0.433887	0	0	0	0.258528	0	0.511647	0	0	1.26693	0.298208	0.818156	0.682636	0.447846	0	1.16902	0	0.274629	0	0.274132	0	0
CG13088	1.43242	1.9592	2.04225	2.72089	1.7923	2.94809	1.01608	1.62126	1.79372	1.1013	1.32344	1.52741	1.43953	1.55727	1.57897	1.80649	1.25085	1.31646	2.68773	0.864375	1.39327	1.48868	1.64897	2.09238	1.69861	0.804829	1.21223	1.00194	1.78793	0.949114	0.7998	1.09898	1.25212	1.47544
CG43400	0	0	0	0	0	0	0	0.464402	0	0	0	0	0	0	0	0	0	0	0	0	0	0	0.106276	0	0.0810933	0	0	0	0	0	0	0	0	0
Dh31	2.94853	5.49939	6.96088	13.2382	2.45954	2.48255	14.2905	8.4948	21.7219	14.5473	14.8593	40.1788	5.11819	4.53657	12.1811	2.18431	6.78141	4.68063	9.52967	5.94433	16.1373	3.83454	5.69313	5.8097	19.2482	3.75361	3.76296	5.51595	11.8565	7.7579	3.90435	3.2337	7.31684	8.58031
Bace	597.427	204.843	7.79457	29.6533	628.325	471.947	34.8396	656.381	14.087	104.645	39.2171	261.436	442.836	33.604	66.6266	434.726	108.445	51.8552	23.4754	149.884	174.362	29.8744	147.245	63.3101	83.7804	126.024	555.362	55.4302	424.969	73.6526	61.1381	90.575	49.506	129.491
CG13096	8.21759	9.95586	7.66165	7.19305	9.10031	8.52932	6.72836	9.19403	5.85485	7.99684	6.34706	7.96402	7.65323	4.27126	4.98762	11.4219	4.89947	8.85449	8.81494	8.14356	6.44082	9.35458	10.6913	8.25603	7.56054	7.56878	9.40893	10.3196	6.46597	6.71418	3.79726	6.40965	4.10391	5.83752
CG13097	14.5437	11.2953	12.7413	10.125	11.4238	12.11	12.8259	9.08733	10.8214	11.7649	11.3006	10.1583	8.12635	7.64349	7.25316	10.6152	8.03568	9.86666	9.21573	12.8321	8.11711	11.4099	10.291	11.786	12.2049	12.3497	9.96253	12.0561	8.55233	9.19278	8.50039	9.30722	7.79303	9.53142
PIG-U	9.70753	8.79372	9.61492	12.6535	13.2239	11.2384	9.52234	9.92401	10.2725	9.30464	10.0989	11.4843	11.0932	11.6348	9.72081	11.7907	10.2662	9.06558	8.00184	7.86564	9.88306	8.18403	8.71927	10.2364	10.2428	9.92745	10.2185	9.28442	12.1749	8.96354	10.0575	8.64906	10.3862	9.15549
mRpL51	17.872	17.5775	17.7315	14.5083	16.8293	10.8073	15.7248	12.0952	12.3106	17.0988	13.416	10.104	14.8592	10.1344	9.08043	14.7998	13.0738	15.2399	14.4108	16.2604	13.4126	17.2336	10.9763	6.87388	15.0756	12.0405	15.189	14.5174	15.5881	15.2065	16.9879	13.2487	9.22415	14.1898
CG13090	2.63894	3.54003	2.97687	4.13635	3.13262	2.40229	2.72832	3.98245	2.34225	2.53386	2.70683	2.78303	4.53907	2.46933	3.24818	4.87399	3.28194	3.91781	3.30775	2.93989	3.11759	3.79745	3.36505	2.86104	3.45031	3.52698	4.00175	3.8475	4.20448	3.84144	3.25248	3.1578	2.90364	3.86017
CG13091	0.515401	1.48699	1.24002	0.867758	0.483667	20.5854	1.86167	1.67712	0.777941	2.20274	0.289575	1.36905	11.3627	3.74811	4.65959	2.13749	4.86078	1.95392	0.916178	1.48703	17.1568	0.992521	1.10135	0.984316	0.560248	0.150362	0.461833	1.67464	12.0547	4.3644	11.5705	3.06795	2.94891	6.37057
Acer	78.0429	72.5978	116.563	135.591	71.8456	96.8982	41.2127	57.6181	42.7281	50.2778	31.0778	50.3478	65.6948	86.762	87.2585	57.0671	71.8202	86.7884	87.4374	76.7816	62.8794	87.6712	41.3094	34.6717	38.0566	29.5553	36.7003	72.1816	55.0104	68.4396	60.0791	74.5528	68.1981	81.4791
lmgB	0	0	0	0	0	0	0	0	0	0	0	0	0	0	0	0	0	0	0	0	0	0	0	0	0	0	0	0	0	0	0	0	0	0
lmgA	0	0	0	0	0	0	0	0	0	0	0	0	0	0	0	0	0	0	0	0	0	0	0	0	0	0	0	0	0	0	0	0	0	0
CG17834	4.69856	3.58112	3.26001	4.45869	6.31857	6.91376	6.99371	8.30002	4.13587	4.21816	7.30278	7.46508	5.39485	4.80746	4.55313	5.96178	4.91045	6.29569	4.3322	5.54471	4.451	5.50861	4.00357	6.39699	4.99892	5.26096	5.69232	6.34916	5.11791	4.00125	3.39634	4.5586	4.58522	4.84316
Sema-1a	1.16957	1.57251	1.46744	1.78826	1.50603	1.70017	1.40405	1.09242	3.44611	1.37732	2.48044	3.90744	1.37792	1.55543	1.56984	0.852611	1.44826	1.65929	1.57441	1.40296	2.30194	1.54941	1.47644	1.67435	1.87614	0.901053	0.932693	1.30976	1.2716	1.32719	1.00229	0.816504	1.5024	1.74901
CR43855	0.464689	0.476687	0.709847	1.2839	1.74431	0.956388	0.728647	1.92848	0.748156	1.00877	0.487354	0.84944	0.116749	0.245769	0.495707	0.405721	0.208691	0.427071	0.826032	0	1.2846	0.17045	0.722167	1.48599	0.489817	0.964038	0.416392	0.69202	0.761277	0.295585	0.270743	0	0.498517	0.147276
Glt	100.717	96.7543	152.27	111.709	92.0259	112.363	66.83	68.5286	42.0024	64.5643	42.8335	59.3051	207.466	260.516	271.731	174.494	223.57	134.683	152.844	110.431	106.306	139.746	77.2306	42.77	54.4419	72.2164	68.4858	118.872	184.396	211.654	212.199	192.925	199.917	214.827
CG9287	0.0584677	0	0.0535882	0.0605781	0	0	0.0392911	0.0661756	0.141201	0	0.0525595	0.0400791	0	0	0.0748444	0.0255241	0	0.161204	0	0.158767	0.107753	0.193016	0.121152	0.0830972	0.0924439	0.0454861	0.139709	0.0474931	0	0	0	0	0	0
CG9289	0.652179	0.669019	0.747189	1.63299	0.952037	0.251675	1.57048	0.676644	3.10631	0.929105	0.41528	1.45296	0.204817	0.0574885	1.32185	0.237258	0.195262	0.899076	0.579658	0.368953	1.05169	4.42562	1.85816	0.868979	4.94102	0.465095	2.56485	1.14782	0.248029	0.181495	0.166242	0.388214	0.0583047	0.18086
PrBP	15.1145	12.5714	18.9076	33.648	17.8896	10.8771	12.9023	24.9671	25.2389	11.0571	17.9479	15.1912	9.46777	8.26395	29.7411	11.0119	9.12696	21.3995	10.2569	9.7061	25.2203	52.4813	38.1436	20.284	24.7454	15.6517	29.4359	22.8958	7.85144	7.06449	8.16656	11.6718	7.37699	8.93324
Trs23	26.1665	21.6444	29.8052	33.3795	24.9812	24.0475	23.9878	18.4887	24.3517	25.8571	23.7944	17.4185	17.8983	25.1985	27.3968	20.8652	20.9215	21.2681	23.929	22.3842	26.7599	25.1324	24.6811	19.132	23.1971	24.4752	22.2723	21.8079	22.4071	23.6677	27.1643	23.9849	25.0425	23.0815
Hnf4	17.043	15.099	17.1788	15.3841	16.4783	21.0593	17.6714	13.688	16.9418	16.3091	16.9748	13.8955	27.3296	27.2806	19.9023	22.2735	22.2082	26.1649	18.4567	20.7149	18.0842	14.5868	12.9979	15.1467	15.3022	16.2724	14.8282	16.4747	21.5449	22.5647	24.5049	21.5504	28.7568	23.4577
CR44992	0.361586	0.185461	0.33141	0.187319	0.60324	1.30233	0.364486	0.136418	1.01878	0.196237	0.433397	0.165243	0.726761	0.860575	0.34715	0.315701	0.70368	1.82773	0.321378	1.14552	0.555321	0.265263	0.156093	0.23554	0.547887	0.0468839	0.306005	0.587431	0.380808	0.402503	0.210672	0.172189	0.797367	0.487045
CG9314	0.0611239	0.188106	0.280114	0.189991	0.229442	0.471752	0.369685	0.138364	0.147616	0.149277	0.439579	0.335199	0.276422	0.0323278	0.195612	0.133418	0.192154	0.674109	0.108654	0.58093	0.225297	0.134523	0.126656	0.0868724	0.0241609	0.142658	0.146056	0.32273	0.107289	0.0291603	0.0801288	0.11643	0.131147	0.087175
raw	16.6484	11.4763	17.0791	21.0294	15.9773	14.2214	35.038	26.37	22.2315	21.4478	28.7594	34.8385	18.1349	16.4868	19.7302	13.3664	14.3417	17.9533	15.6591	18.9047	22.0648	21.166	26.196	28.978	20.5819	34.7601	29.2361	23.033	15.4259	14.9706	16.7293	16.3729	11.717	13.0301
CG45307	0	0	0	0	0	0	0	0	0	0	0	0	0	0	0	0	0	0	0	0	0	0	0	0	0	0	0	0	0	0	0	0	0	0
CG12438	0	0	0	0	0	0	0	0	0	0	0	0	0	0	0	0	0	0	0	0	0	0	0	0	0	0	0	0	0	0	0.0546608	0.0595681	0	0
CG9463	2.13469	0	0.232132	0.187436	0.0905426	6.2551	0	0	0	0	0.0162626	0	0	0.114815	0.0463156	0.0315899	0	0.199513	0	0	3.00061	0.0398143	0	0.0128556	0	0	0	0.0587798	0.0508062	0.0345219	0	0.0344593	0.0129384	0.0516017
CG9465	0.156732	0	0	0	0.0490273	0	0	0	0	0	0	0	0	0	0	0.0684216	0	0	0	0	0.216637	0	0	0	0	0	0	0	0	0	0	0	0	0
CG9466	3.83935	0.115838	1.44897	0.116998	0.470975	2.14977	0	0	0.0909031	0.030642	0.0507557	0.129012	0.0851119	0.597233	0.216827	0.0657283	0.135235	0	0.0669102	0.664379	14.2902	0.0828408	0.058497	0.0401227	0.0148785	0.0585667	0.0449714	0.259891	0.251064	0.107743	0.0657922	0.0896234	0.0942219	0.28631
CG9468	9.447	0.112685	2.04719	0.113814	2.06171	2.43039	0.0492133	0	0	0.0298081	0	0	0.0275985	0.329221	0.304671	0.0639395	0.180887	1.81721	0.130179	5.2201	15.6221	0.201466	0	0	0	0	0	0.0743583	0.167106	0.227091	0	0.0348737	0.0261879	0.40037
CG42710	0	0	0	0	0	0	0	0	0	0	0	0	0	0	0	0	0	0	0	0	0	0	0	0	0	0	0	0	0	0	0	0	0	0
SoxN	0.373621	0.619125	0.395123	0.59555	0.431528	0.621082	0.521471	0.29276	0.670943	0.374341	0.852585	1.06386	0.584874	0.608012	0.790988	0.489314	0.567913	0.316962	0.48534	1.05358	0.556149	0.379512	0.655081	0.561644	0.522574	0.290666	0.540813	0.455237	0.554912	0.808949	0.929343	0.780111	0.503593	0.76513
CR45365	0	0	0	0	0	0	0	0	0	0	0	0	0	0	0	0	0	0	0	0	0	0	0	0	0	0	0	0	0	0	0	0	0	0
CR45260	0	0	0	0	0	0	0	0	0	0	0	0	0	0	0	0	0	0	0	0	0	0	0	0	0	0	0	0	0	0	0	0	0	0
CG32986	0	0	0	0	0	0	0	0	0	0	0	0	0	0	0	0	0	0	0	0	0	0	0	0	0	0	0	0	0	0	0	0	0	0
CG32987	0	0	0	0	0	0	0	0	0	0	0	0	0	0	0	0	0	0	0	0	0	0	0	0	0	0	0	0	0	0	0	0	0	0
CG32988	0	0	0	0	0	0	0	0	0	0	0	0	0	0	0	0	0	0	0	0	0	0	0	0	0	0	0	0	0	0	0	0	0	0
CG32983	0	0	0	0	0	0	0	0	0	0	0	0	0	0	0	0	0	0	0	0	0	0	0	0	0	0	0	0	0	0	0	0	0	0
CG9483	0	0	0	0	0	0	0	0	0	0	0	0	0	0	0	0	0	0	0	0	0	0	0	0	0	0	0	0	0	0	0	0	0	0
CR44414	0	0	0	0	0	0	0	0	0	0	0	0	0	0	0	0	0	0	0	0	0	0	0	0	0	0	0	0	0	0	0	0	0	0
CR44415	0	0	0	0	0	0	0	0	0	0	0	0	0	0	0	0	0	0	0	0	0	0	0	0	0	0.0750142	0	0	0	0	0	0	0	0
CG42713	0	0	0	0	0.215764	0	0	0	0	0	0	0	0	0	0	0	0	0	0	0	0	0	0	0	0	0	0	0	0	0	0	0	0	0
CG34398	12.6873	12.5399	27.2585	18.5734	17.911	14.3971	21.1507	12.9823	11.353	12.8054	10.0792	11.6354	13.6112	22.1178	27.9942	20.8668	20.6822	17.2168	22.506	18.7888	20.0662	11.6466	10.8764	8.47067	10.0562	13.1948	12.6411	26.3128	14.9455	18.3476	23.951	28.1298	22.9498	20.8243
Tsp29Fa	59.0599	17.0235	2.89715	5.51588	51.8327	39.5474	12.4657	43.6852	5.02222	13.7464	17.3857	23.9489	24.3264	7.83103	8.78481	20.7351	26.0381	16.9717	5.47105	25.7504	18.7795	3.66143	9.8248	25.7137	9.76548	14.4312	30.5852	9.39213	25.9895	10.3178	5.81582	7.1698	5.8005	8.18586
Tsp29Fb	131.606	111.023	36.385	52.5346	165.612	141.287	87.4925	188.563	40.7417	72.9043	136.658	102.789	120.04	63.9329	53.9484	130.346	206.462	101.672	76.0856	112.269	63.0195	43.2702	97.7069	103.617	90.2833	89.8706	196.04	91.0852	120.67	60.2717	53.521	50.4864	58.5331	76.7868
CG9510	21.7754	17.8761	24.7203	18.2064	19.7955	30.098	9.57251	11.2328	5.78047	9.55243	6.00896	10.0846	37.8414	40.6947	55.8615	47.0972	35.604	17.3836	22.7786	15.932	19.2586	20.1718	10.1311	6.9696	7.70738	15.2148	12.2932	21.5292	70.0492	53.5851	36.097	48.3172	46.1367	61.9735
CG9515	32.8344	37.8925	32.4646	32.8545	30.5313	31.4165	24.2566	22.3996	35.9366	31.4894	22.845	24.2035	6.61077	10.1102	8.13277	8.05054	6.86794	26.9727	24.486	33.4353	25.3861	29.2021	21.4362	27.3683	30.8022	20.0329	19.5809	25.4382	10.5398	7.51027	11.9401	8.62116	12.2241	9.99649
C1GalTA	9.34224	8.83475	8.11661	15.8804	13.2723	16.7489	10.0057	8.92168	7.83393	7.05065	8.74814	9.67274	10.7089	10.6798	11.3984	12.0014	11.4723	14.0863	9.94678	9.97566	8.0706	10.2268	7.03248	8.6616	9.19348	5.5267	9.09793	8.59655	10.6588	10.0512	7.27164	7.90129	10.7009	12.5143
CG31886	12.9506	10.8534	10.704	14.5762	17.6029	13.1485	8.70299	7.85245	11.0769	10.5427	9.78825	10.0929	11.0104	18.0817	12.4582	10.4995	10.3686	12.4336	9.93468	7.74511	13.9581	9.67035	7.28783	10.3123	11.1675	12.0243	8.68043	9.69006	9.68807	11.8418	8.28653	11.545	20.716	11.4339
CG9525	0	0	0	0	0	0	0	0	0.0300469	0	0.0335533	0	0	0.0197408	0	0	0	0	0	0	0	0	0	0	0	0	0	0	0.0131031	0	0	0	0	0
CG32985	0.0589743	0	0	0	0.0737909	0.182065	0.0396315	0.133498	0	0.0960179	0.10603	0	0.0889004	0.280718	0.150986	0.334689	0.264852	0.1626	0.157249	0	0.16303	0	0.0916512	0.14668	0.0932449	0.183521	0.0704598	0.0958093	1.59414	0.393887	0.386554	0.0842515	0.23198	0.252328
CG32984	9.32836	4.50858	10.6873	2.2304	7.33241	9.87637	1.88867	3.18098	11.6973	5.89014	2.6071	10.1656	26.2761	11.2589	3.75077	10.2591	20.9736	10.7165	1.1161	21.8398	8.98157	3.9481	28.1578	10.7296	2.83638	3.76815	6.21554	9.2046	59.1345	16.6885	9.04093	3.0469	5.60245	9.15369
CG18088	5.54762	2.64219	4.76181	16.4681	4.79287	3.66997	1.06517	1.89366	5.52918	3.36918	4.96725	3.47085	4.38048	1.14103	0.309986	1.11481	3.81623	7.16222	0.782656	11.5374	4.62514	1.84109	14.506	6.74255	2.07103	1.74691	3.748	4.20232	9.56754	1.82741	0.442507	0.2516	0.692764	1.48612
CG9541	0.425552	0.261924	0.507048	0.529095	0.372727	0.656879	0.543356	0.288992	0.342572	0.346427	0.439932	0.641766	1.34714	1.44045	1.49806	0.798833	1.01291	0.703984	0.453877	0.520008	0.901912	0.56194	0.308628	0.483853	0.437349	0.59592	0.190661	0.328391	1.07562	1.23841	1.52483	1.47934	1.12611	1.01154
CG13101	6.84487	2.68913	8.6763	5.28124	5.8312	10.2285	4.25731	3.87362	5.97913	3.08248	4.84401	4.89176	9.16569	7.62549	4.24124	5.6266	5.26508	16.6638	4.401	8.79919	8.65588	2.40389	5.62054	6.18367	4.60532	2.43595	4.17597	4.939	7.1065	3.23074	6.14118	2.49669	11.2491	3.77332
CG18662	0	0	0.328332	0	0	0	0.120367	0	0.288376	0	0	0	0	0.473657	0.229284	0.234577	0.160879	0	0	0.486378	0	0	0.0927862	0.254566	0.0707997	0	0	0	0.628786	0.256349	0.391341	0	0.320254	0.170302
rost	97.2885	63.3964	112.905	69.3046	78.4104	82.5155	49.3718	48.3562	65.0513	48.3651	45.7518	48.8905	143.734	85.8069	96.7947	82.0106	90.8982	153.688	75.4537	79.5372	78.9932	50.9	52.0125	42.687	35.7463	64.8597	43.2472	64.0373	113.497	72.8078	76.3412	64.762	178.285	87.4983
CG9555	8.06351	3.13201	0.143506	0.567787	12.2444	6.88803	0.0526096	4.78479	0.189064	0.254922	0.175939	1.87827	3.12733	0.455454	0.450966	1.05946	0.63285	1.07924	0.834974	2.33843	2.66915	0.344591	0.202774	0.611957	0.278504	0.304523	1.16917	0.445144	1.95128	0.448177	0.342093	0.484646	0.335942	1.15374
alien	25.4306	23.3905	23.1116	23.5692	22.5558	24.6238	19.902	16.5574	25.0211	20.8769	18.3112	17.7757	24.3706	35.2991	29.4174	28.1682	24.7853	21.4982	18.9469	18.7452	21.2584	18.7742	16.9351	18.885	22.2533	16.2782	16.3455	17.4323	26.0166	25.527	31.6496	30.5906	34.7003	25.9308
CG17906	1.3108	0.18336	0	0	0.745508	0.735759	0	0.269745	0.191855	0	0.0535609	0.0816853	0.538896	0	0.228811	0.364146	0.160548	0	0.105912	0.161792	0.439224	0.131129	0	0.0846805	0.0471026	0	0.462705	0.048398	0.209163	0.113698	0.104143	0.113492	0.0426126	0.0566503
CG18661	5.22381	7.23424	3.94998	5.54769	5.06558	6.04759	4.73914	5.76467	3.57443	3.72096	3.81546	5.81893	4.62633	5.24936	6.10189	6.21426	6.04097	2.88056	5.80367	5.49673	5.29498	6.17949	4.32974	4.73303	5.00728	4.16557	5.10996	4.93283	6.18921	5.04654	6.7339	6.2812	6.44471	5.77391
Try29F	0.723172	0.973671	0.33141	0.187319	0.565538	0.558142	0.425234	0.716195	0.436619	0.441532	0.203155	0.557694	0.340669	0.334668	0.231433	0.552477	0.284178	0.249236	0.160689	0.245469	0.832982	0	0.23414	0.353309	0.285854	0.562606	0.297005	0.183572	0.444276	0.258752	0.316008	0.258283	0.517211	0.429745
CG9568	78.6955	24.3288	5.10494	12.2863	33.7215	4.71474	1.32815	9.35439	3.61589	13.1637	7.18739	3.07905	2.97927	7.31697	0.689987	5.96107	28.4834	11.889	14.5319	68.7923	23.6753	0.593135	74.6456	43.8574	7.9542	20.5474	83.3961	1.53243	13.9393	14.5716	2.82641	1.2834	3.34099	3.50202
CG13102	7.25142	4.26914	0.809109	1.89463	10.1778	8.37061	0.38137	5.49538	0.456844	3.64455	0.793577	5.27336	3.80213	1.50073	1.3722	5.23015	2.52033	1.04312	1.34506	2.73962	2.6147	0.346938	2.3192	1.72515	1.64502	3.77728	10.1516	1.22928	3.71885	1.29353	0.771507	1.83168	0.676461	0.92928
Rcd-1r	0.195452	0	0	0	0	0	0.0656732	0.110609	0.0786701	0	0	0.13398	0.0736582	0	0	0.0426624	0.0438885	0	0	0	0	0.107539	0	0.0694466	0.0772578	0	0.0583793	0.0793825	0.034307	0	0	0	0	0
CG9582	0	0	0	0	0	0	0	0	0	0.0710359	0	0	0	0	0	0	0	0	0	0	0	0	0	0	0	0	0	0	0	0	0	0	0	0
CR44352	0	0	0	0	0	0	0	0	0	0	0	0	0	0	0	0	0	0	0	0	0	0	0	0	0	0	0	0	0	0	0	0	0	0
CG31708	0.0974516	0.299903	0.0595458	0.168282	0.203225	0.100284	0.152807	0.330896	0.575295	0.237996	0.394219	0.467615	0.269322	0.137443	0.0831652	0.0850852	0.218827	0	0.17323	0.220522	0.269398	0.0357457	0.269241	0.150045	0.231123	0.101086	0.135836	0.211092	0.0912286	0.0774852	0.170336	0.139221	0.0929295	0.3243
CR44483	0	0	0	0	0	0	0	0	0	0	0	0	0	0	0	0	0	0	0	0	0	0	0	0	0	0	0	0	0	0	0	0	0	0
CG12439	0	0	0	0	0	0	0	0	0	0	0	0	0	0	0	0	0	0	0	0	0	0	0	0	0	0	0	0	0	0	0	0	0	0
Toll-4	0.171266	0.316239	0.219762	0.461366	0.085718	0.105746	0.069056	0.155076	0.303315	0.25096	0.23094	0.328724	0.0258174	0.0362324	0.0438476	0.0598132	0.0307662	0.283323	0.0304444	0.186027	0.157818	0.0753856	0.248419	0.109536	0.216633	0.26648	0.133004	0.278238	0.0601237	0.0490235	0.0299356	0.0326231	0.0612446	0.0977041
CG31609	0	0	0	0	0	0	0	0	0	0	0	0	0	0	0	0	0	0	0	0	0	0	0	0	0	0	0	0	0	0	0	0	0	0
CR44482	0	0	0	0	0	0	0	0	0	0	0	0	0	0	0	0	0	0	0	0	0	0	0	0	0	0	0	0	0	0	0	0	0	0
Or30a	0.102035	0	0	0	0.12767	0	0	0	0	0	0	0	0	0	0	0	0	0	0	0	0	0	0	0	0.0403321	0	0.0304767	0	0.0358197	0	0	0	0.0364875	0
CR44617	0	0	0	0	0	0	0	0	0	0	0	0	0	0	0	0	0	0	0	0	0	0	0	0	0	0	0	0	0	0	0	0	0	0
CR44616	0	0.50437	0	0	0	0	0	0	0	0	0	0	0	0	0	0.143094	0	0	0	0	0	0	0	0.116466	0.129565	0	0	0.133129	0	0	0	0.156092	0	0
CR44615	0	0	0	0	0	0	0	0	0	0	0	0	0	0	0	0	0	0	0	0	0	0	0	0	0	0.191934	0	0	0	0	0	0	0	0
CG32982	17.889	12.2014	23.6929	24.6144	21.6293	9.88988	26.6437	27.7144	21.7544	22.9287	24.9346	24.3298	15.6349	10.1491	16.1191	14.1235	12.0936	19.1518	15.2514	19.7667	30.9226	21.3607	43.6733	36.1198	21.6647	35.8538	28.4783	20.4441	14.1745	10.1231	19.8752	13.5183	12.6581	12.5908
CG13108	0.226655	0.174381	0.415479	0.70451	0.4254	0.524795	0.761577	0.897875	1.27721	0.645793	1.0697	1.78676	0.170835	0.479502	0.290141	0.197893	0.305371	0	0.70508	0.153869	0.626572	0.748244	0.821898	0.644268	0.98551	0.528993	0.406196	0.64439	0.159136	0.378456	0.346649	0.323803	0.243155	0.431008
CG9586	58.5724	56.2143	74.104	92.4572	64.1458	48.0718	70.3516	59.1089	63.1576	77.7146	66.544	60.021	53.1754	63.6671	86.785	60.7088	54.2233	53.5006	53.1239	53.8304	83.2223	55.3592	74.7077	57.9659	68.3209	76.0392	74.9885	54.3404	55.2947	59.2005	71.6023	76.3763	62.4937	53.413
tai	6.56744	6.98119	7.18583	6.02944	6.30895	6.88328	7.38398	7.80711	6.2879	6.41402	6.90815	6.4532	9.08725	7.64056	7.05142	6.49746	7.42593	7.33938	8.09949	7.99351	7.74372	6.59616	7.14648	6.32046	5.25338	7.45985	6.54067	7.72193	7.57481	8.16652	9.24197	8.99836	8.34486	7.22347
aust	0	0	0	0	0	0	0.167399	0	0	0	0	0	0	0.0658735	0	0	0	0	0	0	0	0	0	0	0.0492321	0	0	0	0	0	0	0	0.0445392	0
borr	0.0891429	1.50884	0	1.29305	0.334617	0.1376	0.0599053	0.302684	0.215282	0.217705	0.0801351	0.244427	0.134378	0.0471467	0.228224	0.778309	0.400339	0.24578	0.0792304	0.242065	0.164286	0.686659	0.323251	0.443431	0.387598	0.277402	0.26626	0.470669	0.970112	0.0850547	0.0779064	0.127351	0.0318774	0.169514
lectin-30A	0	0	0.272275	0	0	0	0	0	0	0	0.133524	0	0	0	0.190138	0	0	0	0	0	0	0	0	0	0	0	0.0443652	0.0603266	0	0	0	0	0	0
Ggamma30A	1.5959	3.33573	1.14988	2.91514	2.33159	2.76245	2.90744	2.55804	10.4634	3.86747	7.11514	12.4511	4.17874	4.35689	4.84159	1.40547	5.14959	1.44975	3.64039	3.14376	5.1683	1.24859	3.43114	3.11711	5.49146	1.21286	1.25645	2.33417	2.36729	3.71436	2.77335	1.92849	3.12726	5.56082
CR45262	0	0	0	0	0	0	0	0	0	0	0	0	0	0	0	0	0	0	0	0	0	0	0	0	0	0	0	0	0	0	0	0	0	0
CR42844	0	0	0	0	0	0	0	0	0	0	0	0	0	0	0	0	0	0	0	0	0	0	0	0	0	0	0	0	0	0	0	0	0	0
CR45456	0	0	0	0	0	0	0	0	0	0	0	0	0	0	0	0	0	0	0	0	0	0	0	0	0	0	0	0	0	0	0	0	0	0
CR45457	0	0	0	0	0	0	0	0	0	0	0.100986	0	0	0	0	0	0	0	0	0	0	0	0	0	0.088809	0	0	0	0.157746	0	0	0	0	0
CG17005	0	0	0	0	0	0	0	0	0	0.0421636	0	0.106513	0.0390382	0	0	0	0	0	0	0	0	0	0	0.018403	0.0614189	0	0.0154702	0	0.0181824	0	0	0	0	0.0492457
Cks30A	0	3.72539	0	0.731638	0.126223	1.09001	0.338958	0	0.243624	0.0821217	0.0453423	0.207454	1.52068	1.44054	1.29134	2.42212	1.17791	0	0.0896609	0.136966	0.371828	0.222016	0.156774	0.0716868	0.319	0	0.0903937	0.163886	3.01017	2.35817	2.46855	1.4892	2.34481	1.87035
Eaat1	104.539	116.842	143.451	124.773	126.606	158.861	103.569	95.2068	128.724	123.901	118.629	122.247	110.188	159.317	147.315	92.0935	100.899	104.376	163.648	106.051	99.115	149.473	70.8623	96.6186	96.4709	94.8061	70.8606	142.51	112.826	135.917	142.116	125.683	129.509	145.027
CG3748	0	0	0	0	0	0	0.0399574	0	0	0	0	0	0	0	0	0	0	0	0	0	0	0	0	0	0	0	0	0	0	0	0	0	0	0
CR44802	0	0	0	0	0	0	0	0	0	0	0	0	0	0	0	0	0	0	0	0	0	0	0	0	0	0	0	0	0	0	0	0	0	0
CG43350	0	0	0	0	0	0	0	0	0	0	0	0	0	0	0	0	0	0	0	0	0	0	0	0	0	0	0	0	0	0	0	0	0	0
CG13110	0	0	0	0	0	0	0	0	0	0	0	0	0	0	0	0	0	0	0	0	0	0	0	0	0	0	0	0	0	0	0	0	0	0
CR43404	0	0	0	0	0	0	0	0	0	0	0	0	0	0.101994	0	0	0	0	0	0	0.177703	0	0	0.0685206	0	0	0	0	0	0	0	0	0	0
CG34181	0	0	0	0	0	0	0	0	0	0	0	0	0	0	0	0	0	0	0	0	0	0	0	0	0	0	0	0	0	0	0	0	0	0
Shawl	0.184013	0.283147	0.0843282	0.209721	0.276293	0.539679	0.39571	0.416544	0.711034	0.449397	0.88499	1.29924	0.291259	0.272503	0.341555	0.072298	0.446256	0.30441	0.327102	0.349778	0.508691	0.141744	0.324102	0.509982	0.771005	0.20042	0.186873	0.179368	0.161496	0.324812	0.152777	0.15773	0.171088	0.507384
CR43865	0	0	0	0	0	0	0	0	0	0	0	0	0	0	0	0	0	0	0	0	0	0	0	0	0	0.0725359	0	0.113605	0	0	0	0	0	0
Aldh	985.638	949.819	1071.68	872.664	757.46	727.45	1038.86	598.121	540.468	1110.76	760.618	440.187	586.001	594.374	766.739	667.713	631.978	829.611	1151.82	1018.42	836.079	962.39	577.276	388.045	646.61	937.395	696.453	837.931	680.76	757.873	869.654	689.767	771.229	739.81
CG4438	0	0	0	0	0	0	0	0	0	0	0	0	0	0	0	0	0	0.343034	0	0	0	0	0	0.0442068	0	0.0967925	0.0371619	0	0	0	0	0	0	0
Mco1	1.00555	5.2287	3.97255	4.45479	43.9496	63.6921	40.1951	37.8717	16.8594	12.1941	47.6282	45.0656	26.5267	8.8943	50.6448	43.4584	97.6992	56.0225	4.80767	44.7243	2.39635	1.83148	15.0344	56.6358	76.6434	9.3335	23.4788	15.815	24.5641	40.4781	35.3944	10.2374	20.1739	15.4621
Fbp2	0	0.165775	0.197488	0.111624	0.134802	0.498898	0.361997	0.121938	0.0867276	0	0.435818	0.664663	0.162405	0.22792	0.137912	0.282191	0.145151	0.297041	0	0.146276	0	0.237107	0.11162	0.689034	0.340682	0.0838147	0.579227	0.175026	0.113462	0.0513971	0.37662	0	0.038526	0.102435
CG42847	0	0	0.129805	0.146737	0	0.218611	0.190348	0	0.228018	0	0	0.194165	0	0	0.090647	0.0618265	0.0636035	0	0	0.192289	0	0	0	0.402569	0.0559812	0	0.126905	0.0575207	0	0	0.18566	0	0.10129	0.0673285
FucTB	3.76377	5.00169	3.5542	5.49494	4.78073	4.75342	3.10415	2.90452	5.78429	3.71389	3.6654	5.27734	1.84824	3.22722	3.65	2.5642	2.43301	3.14462	3.39593	3.48423	4.57175	4.832	3.22003	4.98454	5.04929	3.85977	4.10502	4.51647	3.26318	2.33969	2.16798	2.1182	3.32402	2.62973
scat	5.23578	4.95397	4.50076	5.18891	5.85947	6.27478	6.25029	5.88922	5.23583	6.88317	8.21481	6.97753	9.19175	7.49906	9.86615	8.13477	9.09882	4.66249	5.34727	5.29849	5.42398	6.29832	7.32823	6.19343	7.09573	7.46347	7.99419	5.46816	7.19233	7.32283	7.95793	6.59719	7.07059	8.45673
CG3769	0	0	0	0.0899356	0	0	0	0.0982456	0.20963	0.141326	0.078031	0.119004	0.0654248	0.0459088	0.166673	0.0757873	0.0779656	0	0	0.353564	0	0.191037	0.0449662	0.030842	0.137244	0.135059	0.0259269	0.105764	0	0.0414107	0	0	0.0931213	0.0412659
RpS28-like	0	0	0	0	0	0	0	0	0	0	0	0	0	0.167662	0.2029	0	0	0	0	0	0	0	0	0	0	0	0.0946864	0	0.111286	0	0	0	0	0
numb	8.84988	10.5391	6.10506	6.5112	8.77619	9.15552	5.80489	6.87308	7.23791	3.87044	5.94555	6.27626	9.52654	5.913	4.09763	6.01091	13.0756	6.61925	9.97868	6.19964	5.3788	5.15417	6.51096	6.55657	5.9078	5.89615	7.80354	5.49671	11.8818	4.8845	5.16309	3.79965	5.25207	5.6283
CG33723	0	0	0	0.220781	0	0	0.143199	0	0	0	0	0	0	0.112701	0	0	0	0	0.378788	0	0	0	0.110387	0	0	0	0	0	0	0	0	0	0	0
CR43769	0	0	0	0	0	0	0	0	0	0	0	0	0.188769	0	0	0.109334	0	0	0	0	0	0	0	0	0	0	0	0	0	0	0	0	0.0895603	0
Gdi	60.1438	65.4223	67.1247	80.1464	71.8968	68.4856	59.3204	77.6553	73.1085	62.5572	70.1407	72.6565	58.7569	55.0548	53.8635	59.823	57.5739	81.637	64.3939	64.1969	74.8611	88.4309	78.8973	72.4603	70.516	76.3399	85.4686	75.6496	60.434	55.8185	48.4992	56.8189	64.6876	53.3139
CG33298	7.98477	7.60325	5.11959	10.5175	10.3493	13.9004	8.28943	7.80135	7.09075	6.61672	9.56787	10.5788	9.49973	10.6334	12.7995	10.0196	9.16587	9.97098	6.17396	8.87228	8.33111	6.48156	7.13195	10.1207	9.14308	7.71614	8.21902	7.92572	9.35199	9.02784	8.88715	8.54258	11.6455	10.9028
Oatp30B	14.7615	15.0894	18.6031	15.5521	17.7956	24.4178	13.0826	11.7797	16.4227	14.6666	16.1307	16.23	23.4866	20.0991	21.9217	20.0293	24.3386	26.0088	15.3865	18.1843	18.1683	14.2589	14.9501	15.0939	14.9642	15.8066	17.5373	15.2073	21.5289	16.2703	16.0535	13.3876	32.6656	19.6335
CG31883	0.20407	0	0	0.105718	0.25534	0.1575	0.0685688	0.230973	0.246416	0.0830631	0.137586	0.069944	0.153812	0.161895	0.130615	0.356347	0.183295	0.281325	0	0.277073	0.0940226	0.224561	0.052857	0.217526	0.161328	0.15876	0.18286	0.124324	0.429836	0	0.40128	0.097179	0.255413	0.0970148
CG17855	6.54318	3.80126	2.32541	3.66639	10.1921	8.45103	3.23053	8.53932	4.40734	3.8047	5.91201	5.30912	3.573	3.07218	2.09398	4.08062	3.62819	4.23399	2.78911	4.44195	3.81451	3.08581	5.11893	7.18814	4.43379	5.35012	6.80043	3.44391	4.26587	2.16597	1.69218	1.30359	2.29208	1.84099
Cpr30B	0	0	0	0.168613	0	0	0.437452	0	0	0	0	0.223112	0	0	0.104161	0	0.0730858	0	0	0	0	0	0.0843036	0.0578233	0	0.126606	0.145825	0.132193	0	0	0	0	0	0.0773663
CG13113	0	0.252543	0	34.1797	0	0	0	0	0.132121	0	0	0	0	0.26041	0	0	0.0737079	0	0	0	0	0	0.0850211	0	0	0	0.098044	0	0.0576164	0	0	0	0	0
CG13114	0.151252	0	0	5.56325	0	0.116736	0.0508216	0.0855957	0.243517	0.0615644	0.0679839	0.103682	0.0570008	0.799954	0.145213	0.0990436	0.237744	0	0.0672164	0.10268	0.348437	0	0.0783528	0.0268708	0.179359	0.0588346	0.112943	0.092146	0	0.0360787	0.0330466	0	0	0.0359526
jp	115.741	89.331	130.151	194.595	131.664	103.539	112.252	72.6931	142.512	134.492	130.012	103.215	72.8277	110.384	165.215	69.0334	77.6072	142.774	104.57	96.0588	166.33	134.947	132.267	127.657	123.29	150.185	118.968	88.9353	74.375	99.5209	113.616	124.272	132.544	78.7802
CR44149	0	0.28216	0	0.379981	0	0.566103	0	0.622638	0.147616	0.149277	0.082421	0.251399	0.138211	0.193967	0.117367	0.0800511	0	0.505582	0	0	0.168973	0	0	0.651543	0.434897	0	0.109542	0	0.0643733	0	0.160258	0.174645	0.196721	0.261525
CG3838	9.73304	9.05923	7.67311	7.43987	8.30342	10.5062	9.9712	14.7524	11.9719	11.5803	9.88146	9.44799	8.23377	8.6755	8.75634	11.4841	9.10899	9.19534	7.50135	9.14877	9.0942	7.86427	10.8244	14.4498	11.488	13.6879	10.2767	8.05817	8.21948	7.61442	7.52471	8.78366	10.6241	7.08625
Mtpalpha	79.8646	72.4262	106.308	77.5134	63.0079	64.3623	116.124	86.627	82.4624	101.243	106.214	100.121	64.9098	47.3711	51.6819	62.5364	50.0735	95.6182	82.2799	96.5137	69.6033	83.0312	97.5737	48.4345	99.2386	99.0936	122.578	89.576	60.8167	65.529	62.2468	54.4131	67.3987	54.6643
CG31709	0	0	0	0	0	0	0	0	0	0.0675223	0	0	0	0	0	0	0	0	0	0	0	0	0	0	0	0	0	0	0	0	0	0	0	0
gcm	0	0	0	0	0	0	0.10735	0	0.0428649	0	0.0239336	0	0	0	0	0	0	0	0	0	0	0	0	0.0189196	0	0.0414252	0.031809	0	0.0186928	0	0.0465359	0	0	0
CR43621	0	0	0	0	0	0	0	0	0	0	0	0	0	0	0	0	0	0	0	0	0	0	0	0	0	0	0	0	0	0	0	0	0	0
CG3841	4.56813	1.2001	0.255299	0.288599	1.81233	6.96535	0	2.08075	0.0896923	0.0453508	0.125199	0	11.0431	2.26872	2.49596	6.12859	2.95222	1.22878	0.198057	1.28585	1.69404	0.183909	0.577177	0.356294	0.308287	0	0.183036	0.316766	13.0444	1.88697	1.19283	3.28958	1.61364	3.73425
CG4382	0	0	0	0	0	0	0	0	0	0	0	0.174131	0	0.0335875	0	0	0	0	0	0.086224	0	0	0	0	0	0.0494056	0	0	0	0	0	0	0	0
gcm2	0	0	0	0	0	0	0	0	0	0.0404612	0.0446801	0	0	0	0.0318121	0	0	0	0	0	0	0	0	0.0176599	0	0	0	0.0201866	0	0	0	0	0	0
Trx-2	149.559	131.99	285.095	389.866	292.116	105.163	209.95	246.096	227.201	230.521	273.069	249.581	137.533	119.507	1416.72	357.531	122.079	208.528	185.22	170.529	490.287	296.5	673.076	383.978	230.941	304.28	421.45	210.176	113.926	125.818	332.952	218.534	105.927	106.326
GlcAT-S	9.1893	9.36019	11.309	11.0408	9.5007	12.3865	14.0032	9.13117	14.274	15.3477	12.8177	17.8625	23.6075	26.1945	45.0095	22.6382	18.077	10.9433	12.8839	9.48927	13.3575	11.8211	13.0518	16.6933	13.2503	13.0562	9.32954	12.7561	22.1575	21.755	28.9379	20.2158	26.1961	21.5148
CG31882	0	0	0.12716	0.143746	0	0	0	0.157028	0	0.112942	0	0.190207	0	0	0	0	0.062307	0	0	0.188369	0	0.152669	0.143741	0.0492954	0.0548401	0.107934	0.165758	0	0.0487045	0.0661876	0	0	0	0
Apoltp	40.6669	38.5203	63.8136	48.1785	39.7731	49.428	32.4036	38.0997	42.2543	59.3356	33.608	43.5199	40.3606	71.9713	71.8363	24.9909	49.5042	56.6246	55.1469	44.2072	42.5287	46.3169	36.3731	39.9034	30.9829	51.201	34.2935	72.1275	44.2122	54.9272	52.2947	51.3885	44.304	58.9524
CG33299	0	0.215809	0	0	0	0	0.659757	0	0	0.114174	0.630396	0.192282	0	0.0741775	0	0	0	0	0.124656	0.190424	0	0	0	0.0498332	0	0.436446	0.0837831	0	0.0492358	0.0669097	0.0612864	0	0	0.0666756
CR44150	0.0877902	0.135086	0	0	0.109846	0	0.117992	0	0.141344	0	0.0394595	0.0601794	0.132339	0	0.16857	0	0	0	0	0	0	0	0.0909558	0.155965	0.0347015	0.0682982	0.0786658	0	0.0616382	0	0.115086	0	0.0313937	0.0417355
Pka-C1	40.6442	39.6514	43.2911	51.3041	41.878	54.5019	33.045	29.8981	55.5456	40.2112	38.572	37.2683	43.3391	67.2787	54.0725	37.8864	42.96	48.2016	42.1783	36.3594	48.5897	49.3069	38.037	38.4625	41.0551	33.381	35.3272	36.9963	45.054	47.7086	53.3963	48.498	67.8942	44.7362
hoip	16.0122	26.1051	15.0254	19.1578	20.5122	15.5949	22.6738	17.4759	11.9693	18.4663	14.3942	20.3845	18.6779	8.4687	10.0046	41.0256	12.8412	16.8183	13.7234	17.0817	9.13398	24.1228	17.1821	11.7174	14.5423	11.5673	18.0489	21.7553	17.1981	17.9151	9.57916	15.0687	7.02112	13.2308
pelo	14.8241	14.4524	14.4167	12.604	13.876	12.4019	13.0799	12.6799	12.2524	12.4824	12.5887	12.1011	14.6703	15.6208	17.3105	16.3516	15.5765	12.9481	15.2879	12.061	10.584	12.8883	10.0828	15.2387	12.7257	11.4447	12.2356	15.3048	16.0293	18.3552	17.5048	17.6753	17.1577	16.2198
CG31710	14.1635	13.4574	16.5284	27.5854	20.3367	16.8451	21.3767	10.95	19.2521	24.8243	14.3673	20.0015	9.39198	14.1632	15.3071	11.1161	11.5746	15.1509	13.758	14.6066	17.6158	17.0336	13.0705	14.025	19.3348	20.6527	14.8414	20.4952	14.6448	12.8493	15.2191	11.6835	12.4546	11.9581
CG4364	71.9086	68.3168	79.2887	60.1114	65.6407	53.9852	66.811	68.8719	45.6518	59.514	58.0067	69.2339	54.117	48.0006	42.9916	62.6646	52.698	64.285	69.5291	61.9821	54.114	83.0258	70.6071	55.3004	56.654	57.6804	75.4181	74.784	53.2414	54.1349	43.3484	48.1221	38.0652	52.9356
Nckx30C	2.58744	3.1007	2.69936	4.08921	3.43146	3.49701	2.96477	2.57766	9.45468	3.99915	6.73677	11.8517	2.8669	3.75856	4.31957	1.29612	4.60522	3.55053	3.91059	3.70733	6.60342	3.03095	4.66968	4.50779	4.66604	1.95729	2.09771	3.02674	2.70406	3.25378	3.05327	1.95895	3.34716	5.12435
CG13116	27.7192	29.2018	44.5921	57.5587	38.4251	31.4246	112.771	39.4446	34.3508	41.5725	51.6975	62.0498	29.3883	34.5523	38.7961	15.9169	31.8706	28.5407	42.1178	35.6052	42.7123	59.3598	28.8975	40.5811	26.1872	45.2769	34.8697	50.8717	49.8256	35.5017	29.9548	28.098	31.4234	39.9706
CG13117	14.3755	14.5404	10.7802	66.9726	42.0119	8.22423	33.0349	36.1822	36.3356	19.3952	27.5627	58.2986	13.4871	11.8565	12.4182	12.1124	17.9685	19.679	16.3509	27.571	45.7612	65.0459	37.3387	44.2913	39.2993	61.002	54.0477	35.3173	37.3375	10.455	11.3774	11.7765	11.7552	10.8008
Cyp4e3	31.6673	18.4454	112.455	17.6671	34.891	26.6176	64.1442	42.5171	51.3977	108.492	127.556	32.8691	75.3254	306.559	265.421	140.931	106.058	43.6557	16.9218	17.8424	61.1376	5.43165	26.4001	58.0128	30.1532	80.1426	72.6058	6.04028	47.3257	69.8492	279.25	115.665	314.373	52.5694
zf30C	6.72628	6.93984	6.34311	6.8885	6.32429	5.5214	6.27073	9.15322	4.94522	5.22243	6.50096	5.97006	7.26761	6.08674	6.09689	7.17966	6.60027	6.53909	6.77313	7.2321	6.95047	8.17181	6.52571	8.23352	5.76318	7.1082	7.08398	8.00611	5.678	6.47344	6.13327	7.38746	6.3122	7.3565
Taf11	15.1894	14.2068	18.0164	15.7377	12.6704	12.6426	18.8138	14.4951	10.1897	20.3662	12.9852	9.3914	13.5812	9.45119	11.0564	15.8623	12.3724	9.44338	14.0298	15.5685	16.3294	15.4037	12.8057	8.46587	10.2422	17.0302	11.6091	17.4188	12.1284	14.0665	15.8126	20.4233	12.7805	14.7961
und	133.977	109.087	128.256	103.081	94.3374	68.4586	142.347	110.583	69.6992	113.647	109.103	92.7476	76.3847	50.0635	59.6536	85.3622	70.4249	96.3636	103.429	129.059	84.48	133.663	96.9051	78.6027	102.907	122.872	125.648	113.937	73.9192	90.7587	86.6021	91.1301	59.6982	77.2873
ppk18	0.278478	0.214251	0.319047	0.793457	0.261332	0.322392	0.327497	0.236392	0.448353	0.340049	0.156461	1.00219	0.209895	0.036821	0.0891198	0.0911773	0.15633	0.575852	0.185634	0.567148	0.25661	0.306441	0.540974	0.939994	0.467823	0.704104	0.45748	0.282758	0.195521	0	0.121688	0.132612	0.0746875	0.0661942
CG4017	0.143202	0.330525	0.196877	0	0.0895901	0.552616	0.144351	0.405202	0.230558	0.0582881	0.0965489	0.441738	0	0.113607	0.0916567	0.0937727	0.225092	0	0.127278	0	0	0.157582	0.074183	0.0763225	0	0.167111	0.149705	0.116323	0.0251359	0.239111	0.125152	0.0340968	0	0.0340392
CG17633	881.263	23.0796	9.34821	8.25868	220.062	67.3408	8.63967	120.193	6.96866	14.0941	15.5638	301.814	120.61	2.90117	33.1344	67.9109	239.727	35.9195	15.4642	57.8361	88.3775	13.8644	4.17359	8.83154	19.0061	14.336	31.9749	71.536	42.1541	27.4776	37.303	15.6322	3.5247	9.45312
ppk16	1.30334	0.222832	0.530919	0.900256	0.543596	0.335304	0.194636	0.655627	0.641176	0.294723	0.585819	1.34014	0.491177	0.689322	0.278067	0.347706	0.390218	0.598915	0.386136	0.294931	0.133444	0.478071	1.12528	1.49219	0.48656	0.844966	0.670448	0.264675	0.457542	0.138174	0.284763	0.37929	0.258929	0.103268
ppk11	0.223806	0.114792	0	0.386474	0.0933447	0.115155	0.100267	0.25331	0.24022	0.182193	0.167658	0.46025	0.224916	0.394561	0.238745	0.195405	0.234525	0.411376	0	0.10129	0.343719	0.328372	0.541043	0.583154	0.235908	0.464304	0.423372	0.121198	0.209514	0.0711805	0.260793	0.213155	0.293453	0.0709315
IP3K1	8.71807	10.8677	7.9905	8.28956	12.0821	9.45408	9.715	12.8651	6.263	7.77086	6.39865	8.92641	10.3556	9.3677	10.7362	12.9593	16.7266	6.5417	11.8191	7.79133	7.32166	5.52536	9.37543	10.5281	7.19747	14.638	12.2783	10.2191	16.1355	9.0553	10.3919	10.379	8.4648	10.8598
CG4036	9.10187	9.62866	8.55082	7.42645	6.69081	7.37603	8.25739	9.27161	7.32707	6.85381	6.8014	7.72107	7.71781	7.16065	5.38873	8.0462	8.53293	7.84223	7.88751	8.3416	7.12908	9.38984	6.8368	9.78288	9.26425	7.08098	6.28682	8.68727	6.39049	6.3505	7.05969	6.88079	7.11992	7.24778
CG13123	2.53837	2.44117	2.22959	2.52042	2.38208	1.30607	1.84797	1.55621	1.53256	1.8081	1.90156	1.52253	1.27548	2.01378	1.3539	2.35477	1.70997	2.91611	3.00815	2.15402	2.14413	2.79326	2.19159	2.17963	1.96492	1.8925	2.68523	1.76122	1.29953	1.51372	1.57137	1.51098	1.55069	1.70955
nAChRalpha6	0.327235	1.00705	0.259027	1.04797	0.539729	0.596958	0.769674	0.572399	2.96954	0.811283	2.08592	4.0479	1.19959	1.2587	1.28524	0.311684	1.46293	0.287075	0.991525	0.666449	1.64476	0.212783	1.3022	0.935453	1.62862	0.208292	0.275453	0.598078	0.61616	1.33406	0.90996	0.488743	1.09572	1.61932
CR43766	0	0	0	0	0	0	0	0	0	0	0	0	0	0	0.165679	0	0	0	0	0	0	0	0	0	0	0	0	0	0	0	0	0	0.0925657	0
CR44701	0	0	0.360718	0	0	0	0	0	0	0	0	0.269784	0	0	0	0	0	0	0	0	0	0	0	0	0.155567	0	0	0	0	0	0	0	0	0
FKBP59	27.0495	30.6274	27.9328	35.1267	32.4769	28.4733	31.7006	34.0813	25.8835	32.4662	38.1783	40.283	27.8065	23.2909	27.4861	40.6135	27.0789	29.1482	27.8001	24.847	30.3002	33.2958	31.9528	29.2994	28.7907	39.1946	38.2409	31.0631	28.641	27.4089	24.5638	28.262	22.5787	25.7533
CG34183	8.90058	10.0212	7.95881	8.32216	5.43256	7.03699	9.04491	6.14266	9.61163	8.48272	6.7327	4.76196	6.38131	6.77409	5.97471	5.3071	6.23958	7.18249	5.40253	7.36867	8.20167	8.36101	6.41008	8.94753	7.46545	4.72885	4.73343	6.26005	7.16367	4.86758	5.02767	7.13308	7.68539	7.22424
CG4537	5.00516	6.79552	2.42865	7.01612	6.26265	7.27147	4.35281	4.66529	4.50321	4.07453	2.77904	4.03646	4.21632	4.51577	5.27644	7.96885	5.42118	6.49409	4.44859	4.79695	5.69734	5.50775	4.11801	5.02136	4.88788	3.43576	4.57289	6.93557	5.58131	5.61837	7.71928	6.30921	6.42237	4.47897
mtDNA-helicase	4.06301	4.53035	5.18112	2.56241	3.3892	2.45412	3.12611	4.3987	2.32271	3.59517	3.01724	2.78516	5.32588	2.80289	2.78897	5.93808	3.59649	4.0588	4.50093	3.75761	3.25562	4.98937	3.20289	4.14262	3.88703	2.7028	3.28897	3.27646	4.73378	4.55088	4.81168	3.30883	4.59041	4.61894
Uhg2	20.7609	20.871	20.0431	19.7895	27.7086	24.7826	29.5774	28.5107	20.5009	29.0693	25.1329	32.4476	22.1158	12.8835	14.5282	25.4978	16.907	19.0803	19.1904	17.2885	18.3655	20.7134	24.3775	31.1785	27.0262	18.7356	21.745	23.8345	19.1437	19.0164	18.265	17.532	13.0664	15.66
snoRNA:U14:30Eb	2.85698	0	2.61855	2.9601	3.57476	6.61501	0	0	5.74972	0	0	2.93765	1.07668	2.26654	3.65721	4.98886	0.641531	0	0	0	1.31632	1.57193	1.48	1.52268	0.56465	2.22264	1.28002	0.580178	3.51033	0.681487	2.49685	0	1.53248	2.71642
snoRNA:U14:30Ea	1.42849	2.19806	1.30927	0	1.78738	0	1.91993	1.61681	1.14994	0	1.28414	1.95843	1.07668	0	1.82861	1.87082	1.28306	0	2.53928	0	1.31632	3.14386	0.739999	1.01512	2.2586	1.11132	1.28002	1.16036	1.00295	0.681487	1.24843	0	2.0433	0
snoRNA:Me18S-G1620	0	2.65735	4.74856	0	2.16086	0	1.16055	1.95465	2.78046	4.21762	0	2.36766	1.30166	0	1.10535	1.50783	0	0	0	2.34478	0	1.90039	0.894625	0	0	1.34354	0.515829	0	0.606262	1.64778	0.754646	0	0	0.821006
snoRNA:Me18S-A1576	1.02396	3.1512	0	3.18276	2.56244	1.58058	2.75246	1.15895	0.824296	0	1.84098	2.10575	1.54356	1.08312	0	1.78804	1.83944	2.8232	0.910098	1.39027	1.88711	1.12678	1.06088	2.18296	2.02374	1.59322	2.44676	1.66352	0.71893	1.954	1.34234	0.487615	0.732334	0.486791
Bka	23.3552	25.1327	22.9451	17.8719	19.1	13.6664	20.3112	17.1045	18.1867	20.5039	17.496	15.9051	11.7356	12.5138	9.67256	12.6614	13.4366	18.0976	15.4669	18.4458	15.4728	19.6533	15.578	18.007	16.7741	15.3195	15.5021	24.9852	13.8257	16.8223	14.9416	13.0119	11.2995	12.4819
RpS2	446.834	415.924	429.56	327.2	392.146	276.04	499.177	522.762	193.308	387.301	340.116	346.156	354.765	202.587	239.709	409.826	371.964	319.55	454.442	439.178	268.319	635.156	414.171	220.196	313.606	419.309	552.74	542.265	321.123	392.938	283.235	346.476	219.558	366.018
Muc30E	0.352431	0.440616	0.625849	1.27803	1.46073	0.408008	1.09538	0.847647	1.32989	0.968295	1.7029	1.91761	0.332044	0.291245	1.15606	0.307708	0.227522	2.79364	0.763526	0.867296	1.66438	1.23618	0.832974	1.44007	0.600767	1.43945	0.743449	0.653073	0.301573	0.304743	0.587138	0.451041	0.598638	0.272262
CG13124	272.845	224.111	408.596	509.23	367.466	257.196	353.314	274.263	400.667	393.596	403.367	369.534	181.258	276.217	476.496	185.821	190.618	370.84	330.857	306.963	488.552	399.689	470.608	429.448	370.681	508.894	414.137	333.502	213.79	236.637	281.044	292.43	229.238	209.071
Etl1	8.42603	10.0713	8.3779	9.04198	9.60164	9.05801	7.93749	9.57943	9.44778	6.58375	9.43442	8.81867	8.50565	9.78825	9.82311	9.52441	7.85542	9.23048	9.06044	8.32488	9.60149	9.39631	10.6785	12.5502	8.68342	8.6915	9.90975	8.64722	8.96641	9.31373	9.35285	9.97756	9.85997	8.60161
Srp54	10.9526	10.3455	11.0822	12.6963	11.1263	10.8804	10.3117	13.5012	7.46385	10.6817	11.5275	11.5964	8.09177	6.76774	10.3418	9.98883	8.93665	9.11919	11.325	10.7482	11.5915	15.9904	15.5889	9.78682	9.73028	13.4983	15.5474	13.0809	7.80413	9.57084	8.34001	9.47604	7.15467	7.62989
yip2	174.102	131.58	256.169	176.422	149.357	132.253	263.234	179.072	189.639	234.096	238.652	204.364	211.853	141.619	179.689	198.781	137.512	215.357	146.905	198.323	189.711	165.314	227.651	83.4661	250.877	240.736	266.62	173.417	210.661	147.664	186.87	148.783	272.237	132.753
CG5885	58.7638	54.213	52.1914	47.9537	71.5755	52.7789	82.8244	78.4297	31.0834	51.5419	65.8569	71.6522	50.9549	37.268	56.2512	60.1606	74.3845	46.2403	55.8115	64.9583	31.7469	69.6718	53.8112	31.1345	54.0103	70.193	80.7707	105.13	49.8845	103.64	46.5277	82.4031	35.5655	68.5429
CG4598	39.8696	31.4796	48.9265	44.365	31.9082	31.2853	43.9941	44.2641	38.2233	42.3716	40.1605	38.0928	37.1509	30.5479	31.2435	37.6765	31.11	39.3531	35.0133	33.9781	38.8432	40.313	39.7299	24.5795	40.2076	40.3448	49.2544	40.4245	41.4212	31.1411	36.7151	34.4831	41.547	28.4084
CG4594	11.854	14.0433	12.4031	9.34727	13.1258	16.1927	8.45952	13.5355	10.7248	10.3331	10.5618	9.27636	17.3948	18.9193	13.3614	19.0508	15.3113	15.6185	13.5194	10.9671	12.9531	9.46578	9.50995	9.76558	11.0713	11.4255	10.81	12.3131	22.3536	19.5178	26.2204	16.0356	26.4467	17.9036
CG4592	9.52885	14.179	10.1732	7.59447	13.7572	9.37476	7.10721	10.074	7.33362	6.39323	6.91867	7.82398	10.8126	8.14107	6.03192	15.4965	11.1923	8.37252	13.588	6.82426	11.1929	8.75728	9.22152	6.17616	7.90561	7.57609	8.9138	9.90924	11.3588	11.09	7.22958	9.27483	10.934	9.10982
TbCMF46	0	0	0	0.0680001	0	0	0	0.0742833	0.0528335	0	0.0589991	0.089979	0.0989351	0.0347115	0.0420071	0.0286513	0	0	0.058333	0	0.0604774	0.0722213	0.0339988	0.0233195	0.0259425	0	0	0.026656	0	0.0313105	0	0	0.0234696	0.031201
CG42366	0.0425865	0	0.15613	0.132371	0.0532859	0	0.200331	0.0964015	0.102847	0.208009	0.153133	0	0.0962951	0.0675706	0.136287	0.0743647	0.114753	0	0.0757019	0.173464	0.117727	0.0468628	0.132366	0.0605261	0.134668	0.0993931	0.0381603	0.0864822	0.0598006	0.0812668	0.130265	0.0405598	0.0913733	0.121474
CG42367	0	0	0	0	0	0	0.158688	0	0.190093	0	0	0	0	0	0	0	0.106049	0	0	0	0	0	0	0	0	0	0.141063	0	0	0	0.103186	0	0	0
Cpr30F	0	0	0.128236	0	0	0	0	0	0	0	0	0	0	0	0.0895509	0	0	0	0	0	0	0.153962	0	0.0994253	0	0	0	0.11365	0	0	0	0	0.0500325	0
CG31712	20.1087	23.7278	18.397	14.421	17.5071	22.3893	14.4241	14.8415	18.5465	18.6061	16.595	17.0986	28.325	34.0174	23.1389	26.7672	26.5824	18.9858	26.2393	19.2459	21.2636	14.3086	15.4641	16.8276	18.0109	11.5406	14.2224	16.4235	23.788	35.4024	36.1564	29.4427	39.0323	31.3607
CR45007	0.361135	0.333413	0.330996	0.299336	0.271119	0.557445	0.19415	0.326995	0.232573	0.352785	0.259714	0.495109	0.816585	0.802201	0.369831	0.662145	1.29748	0.796559	0.513563	0.19613	0.532443	0.635836	0.224494	0.436274	0.228398	0.168571	0.25888	0.645367	0.2282	0.689144	0.504982	0.481527	0.464909	0.583724
Apf	19.3888	16.6815	15.4777	21.3847	22.6949	15.7688	17.5128	14.394	15.9438	17.3113	13.8687	13.5767	20.4279	23.0452	19.2152	22.2982	19.6621	20.1185	18.7152	21.5128	18.0584	16.7474	9.93598	14.0004	16.5641	11.8401	14.0733	17.0196	23.4203	22.2791	31.0656	28.1956	29.4484	24.8772
CG4619	40.1451	39.1298	34.8974	35.0435	31.3988	36.6625	27.8993	18.46	35.425	40.5151	27.6008	15.3417	42.4037	52.1561	47.5221	42.3418	41.5109	38.258	42.7178	35.9325	37.9466	31.8931	23.5934	15.6358	28.0104	26.1171	27.7337	20.6567	44.7542	64.6897	70.2186	54.7141	69.7084	48.3443
CG5853	56.9936	41.6089	74.4743	57.7711	53.65	43.4427	67.5298	45.3847	58.5222	70.1694	64.7964	70.9403	20.9799	42.3219	33.26	31.8518	14.0459	70.9073	52.5771	47.3157	59.0626	43.688	49.0853	31.2535	36.3556	81.1972	68.2251	55.7018	27.2552	32.9772	20.9532	27.9389	50.8101	22.2085
mir-87	0	0	0	0	0	0	0	0	0	0	0	0	0	0.618146	0	0	0	0	0	0	0	0	0	0	0	0	0.349096	0	0	0	0	0	0	0
CG13126	12.8564	10.2941	11.5702	9.3424	8.66191	11.2246	10.9071	8.62541	9.45972	11.6972	11.6357	6.38041	13.4171	15.1684	14.4841	14.1455	13.5592	9.78399	9.10006	11.1368	9.16657	9.73031	8.73935	8.26795	11.3134	9.36829	10.4255	8.55304	13.887	16.3187	19.4466	15.1256	17.3912	17.5614
CG4709	4.61226	4.31993	4.71747	5.26354	4.01463	3.7145	5.34552	3.70717	3.60528	4.08118	4.02601	3.61987	5.13897	3.99492	3.37991	5.71947	4.95324	3.13309	5.64408	5.08238	4.80444	5.59029	4.39767	4.67888	4.91451	4.10823	3.85337	4.77818	5.18597	5.51686	5.9587	5.85701	5.40218	4.60778
CG5846	4.10796	9.69227	4.89467	3.97249	5.31137	3.17051	5.52121	6.04437	1.98416	5.46211	4.00059	4.31782	5.9861	5.35922	5.52153	7.89067	8.30195	6.79574	7.18062	9.10995	5.80426	7.83546	4.18515	2.82191	3.5182	3.40893	4.3354	4.83848	8.02777	12.6732	11.9073	8.73783	9.79334	10.6109
CG4658	66.7592	63.1449	54.8286	39.2747	42.7187	46.3003	53.3069	46.1118	40.8341	52.6589	45.3522	32.9156	84.8197	72.4736	57.8117	76.2393	74.0606	50.3903	67.5329	64.793	48.2234	45.2509	37.8268	43.1266	45.6697	55.228	49.8758	41.685	86.7639	92.0142	98.2941	98.5563	95.9006	86.0811
CR44872	0	0	0	0	0	0	0	0	0	0	0	0	0	0	0	0	0	0	0	0	0	0	0	0	0	0	0	0	0	0	0	0	0	0
CG5850	10.4808	12.2566	13.1411	13.5232	12.3096	14.021	11.9265	12.3369	12.9144	11.4443	11.0799	13.296	17.5476	19.0093	15.8135	14.873	16.7314	12.1752	14.5319	12.9399	10.7909	12.8556	11.7418	11.9762	12.4616	16.9815	13.7741	15.6308	15.3157	17.7602	17.672	17.9143	20.4586	17.6847
CR43683	0.425787	0.491378	1.17076	0.882312	0.799141	0.821552	1.43067	1.44576	0.342761	1.47313	0.765522	0.583746	5.45572	4.10979	3.33843	4.36812	6.31026	0	1.04071	1.01168	1.37323	0.585677	1.32342	1.2103	0.546988	2.81562	0.508711	3.02632	5.04475	4.72276	6.79112	5.52525	4.22524	4.70625
Dref	12.5699	12.7705	11.2624	9.64249	10.4349	12.9974	11.8043	13.4062	11.1891	13.2829	10.5029	9.74885	11.7517	11.6768	10.0567	11.4145	11.6521	8.77533	13.2848	13.1281	10.9146	11.4381	10.31	14.4008	10.0646	11.7536	10.0962	12.0104	12.4602	12.1087	12.8692	13.7559	13.9748	12.5069
RpL13	244.784	231.618	263.849	188.546	223.725	123.227	318.397	342.916	98.6428	239.83	197.958	199.511	217.05	98.7893	134.02	258.817	246.862	181.654	319.636	287.69	172.562	381.132	260.636	121.218	158.234	268.704	336.47	352.634	192.158	247.553	177.994	220.219	124.062	207.501
CR13130	0	0.427473	0.127312	0.863511	0.695211	0.428824	0.466729	0.47165	2.68366	0.90462	1.37355	0.856961	1.04695	0.220395	0.800153	0.121278	0.748582	0	0.493834	0.377191	0.767983	0	0.791523	0.246773	1.26284	0.108064	0.207446	0.902654	0.195052	0.596404	0.303489	0.264588	0.248361	0.924494
bib	0.0706395	0.380433	0.0647443	0.109784	0.265161	0.109039	0.213618	0.279832	0.284327	0.230021	0.20638	0.774764	0.319455	0.242843	0.203458	0.0770944	0.206207	0	0.188354	0.191819	0.26037	0.155465	0.27445	0.100396	0.0698056	0.0549554	0.0843969	0.0860704	0.235583	0.15165	0.108037	0.134555	0.0757818	0.402985
CG31875	1.1226	1.60399	0.881922	0.747718	1.40463	1.73283	0.916057	0.99832	1.22645	1.04442	0.720827	0.989394	1.32962	1.65396	1.18042	1.82026	1.51247	0.221083	0.926496	0.762094	1.33	0.882372	0.996921	0.797745	1.20443	0.873346	1.02987	0.944448	1.88601	1.60667	1.92715	0.954617	1.46238	1.86789
SoYb	0.542121	2.13985	0.734516	1.00127	0.7668	1.89193	0.665267	1.06711	1.57488	0.748329	1.32429	1.0987	5.09872	4.63742	2.51941	4.51719	3.47203	2.33954	0.879878	1.53612	1.34662	0.95968	1.46522	1.25623	1.68636	0.880183	1.36581	0.832861	3.11949	3.00235	3.24441	3.78262	4.57683	3.5073
CG4747	32.3246	35.7216	33.061	31.4743	32.8163	35.2675	29.4489	37.5839	32.8227	27.0022	31.0395	29.8633	28.9043	30.5788	29.9996	31.5902	26.3944	36.1558	36.7616	34.0134	31.1064	37.5916	31.9679	39.1285	31.7978	34.7494	32.6844	35.8948	28.64	34.382	31.0109	35.5792	34.9667	29.215
CR44873	0	0	0	0	0	0	0	0	0.126901	0	0.14171	0	0.118816	0	0	0	0	0	0	0	0	0	0	0.0560114	0	0	0	0.0640251	0	0.225615	0	0	0.112744	0
Trp1	59.1478	55.9687	65.8992	69.0345	67.4138	82.8746	92.1448	109.179	98.4107	86.7623	86.1436	111.249	64.4775	72.1217	62.8549	53.7578	68.1513	71.874	52.0688	60.3101	56.9747	63.7926	87.6551	96.2186	97.8157	101.731	100.505	93.9316	63.2667	61.1044	59.7318	54.9884	65.4896	64.2909
CG13131	0	0	0.0256782	0	0	0	0	0	0.0225534	0	0.0125927	0.0384099	0	0	0	0	0	0	0	0	0	0	0.0145133	0.00995457	0.0110742	0	0.0167363	0	0	0	0	0	0.0100186	0
CG13127	0	0	0.0404312	0	0	0	0.0296443	0	0.035511	0	0	0	0	0	0	0	0.0198109	0	0	0	0	0	0	0.0156738	0	0.0343183	0.013176	0.0179163	0	0	0	0	0	0
obst-B	0.302108	0.309909	1.29218	0.313013	0.37801	0.932665	1.2858	0.569893	1.4592	0.409894	0.995795	1.03546	1.21443	0.905431	0.773458	0.835276	1.58289	3.60948	0.895048	1.91419	0.371181	1.21896	1.14767	0.822963	1.433	1.33184	1.68441	2.00411	1.55549	0.720633	0.792083	0.863193	0.612191	1.81922
CG33301	24.8738	21.5292	2.23908	3.75836	60.3935	80.2182	10.298	20.1092	2.44335	15.0661	8.95078	20.7552	12.4986	4.15024	5.59111	25.1107	4.85397	13.6753	6.25073	9.34761	8.79987	6.02824	5.0621	7.65432	9.18829	14.5133	29.1432	4.32962	11.8506	3.81424	6.92266	7.19162	1.69425	4.08244
CR44874	1.74559	0.767425	0.114279	0.645927	2.02814	3.0794	0.921689	2.25796	0.301117	1.11652	0.61647	2.3077	0.845799	0.197833	0.478827	1.08863	0.279979	1.03132	0.22164	1.69289	0.919152	0.54882	0.516723	0.797438	0.739277	1.45502	1.75037	0.303843	0.481482	0.17845	0.272421	0.0593755	0.178349	0.0592752
CR44875	0	0	0	0	0	0	0	0	0	0	0	0	0	0	0	0	0	0	0	0	0	0	0	0	0	0	0	0	0	0	0	0	0	0
Cpr31A	0	0	0	0	0	0	0.0632685	0	0	0.0766424	0	0	0.0709612	0	0.0602592	0	0	0	0	0	0.0867548	0	0.0487713	0	0	0	0.0281209	0	0	0	0	0	0	0
Pen	3.54711	10.5706	2.63379	4.00079	2.24723	5.05945	3.4096	2.28687	2.02411	2.88758	2.38141	1.44659	1.62442	1.44858	2.06916	11.9763	1.73415	4.20906	1.55638	1.34117	3.47544	2.22339	2.44225	2.48876	2.09427	4.12185	3.76853	2.37069	6.1946	1.28523	1.86392	1.77468	1.18816	1.34477
Spn31A	47.7253	44.386	46.7872	53.1419	36.4986	31.1434	45.7939	39.4352	52.0519	40.8964	36.0922	27.4941	104.25	123.421	80.5413	95.2941	96.8685	42.6703	46.7394	41.0353	39.4978	60.2749	47.8931	53.2618	54.8327	41.2893	44.2655	36.8584	86.8428	114.885	144.142	150.6	125.058	100.192
CG44153	0.0791541	0.121797	0.0290193	0.114816	0.0990407	0.0733091	0.106385	0.125425	0.369574	0.0515494	0.313085	0.661965	0.202845	0.142337	0.233048	0.0345548	0.234617	0	0.211057	0.171953	0.131289	0.0522614	0.221422	0.129373	0.162697	0.0492637	0.0520134	0.19932	0.177839	0.211467	0.0830121	0.0376936	0.15851	0.270935
CG13133	0.0978913	0.753142	0.0897217	0.20285	0.122485	0.151104	0.328922	0.221593	0.23641	0.39845	0.527997	0	0.0737828	0.103547	0.0626553	0.0427345	0.131888	0.2699	0.348024	0	0.0902044	0.323163	1.47061	0.0695641	0.193471	0.0761565	0.029239	0.596376	0.206191	0.140103	1.02663	0	0	0.558451
CG34109	0.0455362	0	0	0	0.0569766	0	0.0612019	0.103079	0.073314	0.0370695	0.0204674	0.124859	0	0	0.0582909	0	0	0	0	0	0	0.0501087	0.117945	0.0485388	0	0.0354258	0	0	0.0159857	0	0	0.0216846	0	0.0216479
CG13135	0	0	0	0	0	0	0	0	0	0	0.0808828	0	0	0	0.115177	0	0	0	0	0	0	0	0	0	0	0	0.107498	0	0	0	0	0	0	0
CG4839	11.425	6.56177	3.46881	4.7313	15.1181	19.1167	6.56732	12.8307	4.74881	5.94496	7.25168	10.2556	3.61595	1.55059	1.89923	3.66121	3.76644	10.0429	3.50594	8.80552	5.38675	3.20662	6.23147	6.15549	6.27193	4.46491	10.8957	6.92071	3.54298	2.82275	1.81685	1.86996	1.2136	2.29761
CG13137	0.249908	0	0	0	0	0	0.111961	0.188569	0.0670593	0	0	0.0571033	0	0.0440579	0	0	0	0	0	0	0	0	0	0	0	0	0.0746448	0	0	0	0	0	0	0
Sur	1.31104	0.492035	0.849933	1.32524	1.18031	1.03654	0.956249	1.19434	1.44152	0.780933	1.30792	1.05215	2.74757	2.82432	2.46623	2.23351	2.1541	1.67512	0.682102	1.45443	0.92817	0.897283	1.53225	0.931661	0.985894	1.1319	1.25596	1.03249	2.03182	1.73145	2.068	1.7207	2.18977	1.93062
CG31874	0.142585	0.1097	0.0653426	0.147732	0	0	0.0958189	0.080691	0.229564	0.34822	0.224309	0.0977405	0.214938	0.867233	0.547568	0.435719	0.448242	0.196563	0	0.387185	0.131388	0	0.147726	0	0.112721	0.33278	0.14906	0.115821	0.400439	0.340114	0.498448	0.135799	0.433399	0.203355
Ripalpha	32.1665	35.7782	36.4735	27.9	29.0935	44.4031	27.8542	21.3241	34.0325	34.6399	24.62	16.3799	53.1996	88.5137	63.7057	55.6076	55.5962	31.6742	36.9215	26.3289	34.3832	25.6877	17.3773	28.8342	30.5516	25.3106	17.3763	24.1504	60.5906	69.8446	88.1108	65.9105	96.8528	62.3039
RpL7	844.754	742.836	933.74	649.449	708.257	438.172	1060.81	1009.87	326.847	825.546	712.911	725.402	614.664	356.691	419.602	741.885	674.597	583.097	904.507	859.676	537.494	1092.91	814.607	453.399	595.477	817.558	976.875	998.884	593.804	667.372	543.783	685.097	401.04	650.85
CG34159	16.3177	15.4075	14.9559	13.7047	13.4569	19.0818	11.6303	18.8887	15.8228	11.9755	11.5017	14.2363	15.0011	16.999	12.5805	17.485	16.2665	17.7234	15.3822	18.4626	15.9477	17.1401	15.8175	19.1067	15.1967	14.1373	17.6126	17.4221	16.838	15.4514	12.4783	16.1887	19.4949	16.6315
CG5734	6.61186	6.21736	5.96387	6.63304	4.4648	7.04702	6.59436	8.4338	6.04072	5.72423	8.72691	7.66186	7.75211	6.49432	7.25472	7.28476	7.68267	6.80002	6.71615	5.98477	8.0752	8.71939	9.81329	7.06648	6.45083	8.20563	9.32586	7.99225	8.27128	6.80931	5.73257	6.59706	5.49815	8.90596
CG5731	0.197117	0.505516	1.44533	2.17847	1.64427	0.912804	0.750636	1.48735	1.00498	0.695353	0.97459	1.26114	0.297142	0.868774	6.47645	1.86445	0.619673	1.8116	0.875988	1.07053	2.78512	1.44607	1.66783	1.33072	0.597355	1.17569	1.05978	0.934018	0.715052	0.407499	1.52172	0.876101	0.728383	0.718439
CR44845	0	0	0	0.123465	0.149102	0.367879	0	0	0	0.0970068	0	0.0816853	0	0	0.152541	0	0.053516	0	0	0.161792	0.109806	0.131129	0	0.211701	0.0942052	0	0.0355927	0.145194	0.125498	0.0568491	0.0520714	0.226984	0.0426126	0.113301
CG5727	8.39329	9.45564	16.3473	24.3806	16.1281	10.4109	10.3743	13.7408	16.8917	11.2251	11.3177	11.918	8.24666	15.2991	53.0497	13.2824	9.01966	16.9429	9.32496	8.1399	33.9753	9.2361	19.4106	24.4437	12.619	10.6108	16.2954	9.37454	8.52379	7.07882	11.1995	9.92094	11.4698	8.55037
CG4901	8.60336	8.79908	8.26311	8.16664	7.73523	9.70163	7.16639	7.46352	9.28966	7.46503	6.57621	6.67445	7.76592	8.82798	7.74878	9.46823	7.33419	8.23833	8.10457	8.2537	8.59239	8.27677	7.95284	9.15235	8.79707	6.613	6.97058	6.84202	7.75859	8.33168	7.63147	7.70327	8.54803	7.73924
Npc1a	17.7635	17.7769	21.5652	33.6266	26.0979	25.3236	16.7092	22.0705	36.3228	19.3171	24.6931	30.1213	23.2373	29.5857	29.5208	21.233	21.0335	31.9759	19.2901	20.5518	33.7218	23.197	30.3966	31.2258	26.0975	25.1106	24.6804	24.3019	24.1623	18.2975	19.4639	20.4692	25.6954	20.3288
Prosalpha6	45.6342	42.9299	46.7814	65.9923	45.057	35.2203	50.5784	61.6865	34.1243	39.5261	63.3327	56.411	47.5994	36.2031	35.0913	52.8726	51.8183	35.1819	43.4431	42.8722	43.1469	77.9427	71.0876	64.0892	40.65	45.2609	74.935	56.1298	52.198	38.2276	44.1821	46.1402	39.018	43.4404
CG4908	9.27013	8.12125	6.1398	4.48689	5.75724	6.78909	6.86627	4.8249	5.93734	7.216	5.80904	4.68477	12.1382	12.4182	8.96499	13.8539	10.7879	5.22375	7.3372	6.98223	5.61167	3.57407	4.0661	5.12101	7.43554	3.52698	5.33566	4.03987	11.9483	16.0436	15.6119	13.759	15.0505	11.8057
CG5708	27.3126	25.9142	50.0663	68.531	52.299	35.9635	23.808	32.691	66.8736	34.0972	37.5742	44.9819	22.1646	37.6594	76.516	29.0274	23.7483	37.2914	30.0147	31.2779	69.7142	37.929	59.1262	59.3742	38.3208	44.3296	26.3504	26.6869	23.0055	25.269	35.881	33.8249	36.3842	26.84
CG5694	16.9588	16.9245	19.4516	23.6957	20.8557	22.8866	12.2106	16.2879	26.8749	13.3717	16.639	16.2752	14.0239	18.5281	18.5767	13.5376	11.9683	20.8406	16.2789	16.2495	23.3514	16.209	17.0934	23.6207	19.6315	16.0206	14.9212	15.8813	13.5909	12.7599	14.5671	14.7442	19.9261	11.9321
eEF1delta	447.244	415.753	467.288	387.04	341.975	432.079	308.096	250.492	391.452	375.353	259.086	230.428	364.727	462.205	320.894	348.904	376.851	391.215	388.757	372.097	320.669	379.372	278.966	245.611	377.721	240.757	277.788	296.754	401.293	539.751	616.815	498.457	543.919	459.205
mthl15	3.71276	1.00447	0.411341	0.760901	3.62455	3.84165	1.12413	3.41719	0.525503	1.89317	1.50375	1.84587	2.06035	1.46733	1.12289	2.79634	1.55746	2.69976	0.290102	1.99422	1.50383	0.314275	1.0145	3.20375	1.77399	1.65052	3.86308	0.795393	2.24868	0.895353	0.76662	0.990876	0.933752	0.543091
me31B	77.4519	109.142	78.2306	74.4646	76.6655	118.296	52.8495	70.414	104.505	72.2406	61.0562	60.4009	82.9098	124.947	93.0449	151.537	85.114	87.1475	65.8294	62.4995	75.8776	65.4919	68.0618	92.1407	77.4672	53.3759	55.2968	62.8885	113.294	90.4749	109.618	90.9083	131.688	84.1062
chico	34.7317	35.6782	39.3912	32.7018	35.5672	44.3768	30.8812	39.2372	56.361	38.1197	37.8793	35.1803	34.2459	50.0449	32.6205	30.2396	32.9386	39.3205	36.733	37.2333	38.8284	36.6534	33.7392	69.3096	43.6275	39.7252	29.4605	35.3837	43.3555	37.366	39.1716	45.9684	51.0677	33.6532
CR44995	0	0	0	0	0	0	0.204624	0.344635	0.490239	0	0	0	0	0	0.194891	0.132927	0.136747	0	0.541269	0	0	0.335069	0	0.324571	0	0.473774	0.0909488	0.12367	0	0	0	0.435004	0.435546	0.289513
bsk	38.0722	41.2022	38.6787	46.3378	42.3285	50.0945	32.8676	36.2772	59.1275	36.5945	45.4101	47.4798	32.0668	52.8873	43.7085	32.0895	38.9087	40.7868	35.0108	31.2176	40.8945	36.3429	34.9303	52.4193	48.0484	34.9273	30.6558	33.1383	36.2114	33.3446	39.5871	35.8235	47.5281	36.6625
CG31717	53.1492	37.3694	63.9803	112.638	81.6164	46.7122	67.5034	42.0228	61.9263	70.9039	74.1824	63.889	34.3095	41.0218	117.924	40.7983	36.0893	48.7297	36.955	40.3972	100.529	66.4615	71.7303	48.7475	60.9654	84.2797	86.1734	42.8114	38.5216	36.7599	44.4495	51.4069	36.2843	33.6089
Ror	0.2038	0.391992	0.186792	0.263946	0.191252	0.235938	0.513587	0.519002	0.943349	0.331814	1.14504	1.01285	0.0768043	0.215575	0.489158	0.133454	0.411868	0.140476	0.271707	0.345883	0.187797	0.280331	0.184755	0.253445	0.825716	0.356738	0.182618	0.248319	0.089431	0.388907	0.289431	0.121313	0.291515	0.217995
CG5676	596.593	465.597	622.929	880.034	691.318	554.397	653.2	363.422	766.36	673.074	674.003	486.729	487.09	822.133	1063.3	590.054	510.18	517.322	326.577	385.702	679.245	496.225	454.966	565.469	631.629	531.908	498.364	370.822	463.876	515.755	619.82	695.742	671.07	492.992
Pten	15.5064	16.7022	17.6639	18.0553	17.0924	21.4281	15.9285	16.4224	28.9482	19.3557	18.9677	19.285	14.4981	24.6036	19.9207	15.3761	15.9838	21.1731	16.9323	14.4368	18.7796	15.6415	13.7131	23.2061	19.1907	17.8943	13.1449	15.4749	15.916	16.8913	18.2466	19.2518	26.3523	16.0599
Rsf1	26.6259	24.582	26.7538	17.642	20.0714	26.9938	15.5956	15.5517	26.303	18.9993	17.4344	15.4126	23.1903	38.8737	26.2151	23.0462	23.5019	22.114	22.9639	20.6194	20.355	19.9671	13.9973	20.4861	18.8144	14.8835	12.8424	16.9554	25.9411	28.0707	31.4859	34.4065	40.413	24.9096
CG18619	148.011	162.317	143.52	97.1931	122.399	175.788	121.787	109.272	168.367	127.77	86.6248	90.8261	117.887	203.087	146.015	130.503	159.007	135.861	146.8	138.268	130.166	128.13	88.3971	147.265	118.165	87.3193	90.9258	130.087	161.517	142.006	176.805	167.822	191.286	138.126
Mob3	45.9278	49.7817	49.1882	44.6936	39.3694	58.1643	39.1343	29.5812	55.254	44.9279	42.4843	33.1355	50.3951	75.6904	51.1589	58.1001	46.893	49.3225	44.8802	37.0357	38.9309	40.7667	28.7869	39.3543	38.2643	32.9668	26.9436	32.2056	57.8116	48.4215	62.6472	63.136	78.5344	51.4488
CG4953	8.88019	11.3189	10.2042	8.51411	10.7796	11.9684	7.83805	9.37582	10.4028	7.55275	7.4169	7.67725	9.83999	13.3889	11.8765	10.7042	10.3869	9.1358	10.131	10.3474	8.79354	8.53217	9.74967	10.7372	11.2901	9.17699	9.0657	8.63987	10.3992	11.4132	10.2223	13.0651	12.4178	9.04188
CG4957	19.083	22.3329	21.9246	25.7591	17.9921	34.0201	19.4167	13.233	28.6685	25.0526	17.7587	13.2655	22.1827	33.0504	20.6435	26.4001	21.0029	16.6736	20.4249	16.969	25.3861	17.4501	13.8537	19.0998	21.4606	14.0096	13.6476	11.7895	25.57	32.9536	31.1824	33.5339	49.3543	24.5329
Mulk	7.30409	7.53837	5.87812	6.27569	7.35591	6.87473	5.02817	7.25883	5.66473	4.42325	4.52415	7.57139	9.53349	7.58478	7.92467	11.6656	8.76068	6.63094	5.9377	6.7726	7.3051	7.15536	7.33675	5.47532	5.8095	5.68237	7.15688	7.34401	8.94318	8.49892	8.71881	8.48352	9.07807	9.27377
trk	0.787126	0.403725	0.360718	0.271846	0.492441	0	0	0.148482	0.316821	0.213591	0.117931	0.269784	0.296637	0	0.0839666	0.629971	0.235665	0	0.2332	0.712472	0.241772	0.288722	0.339795	0.0466127	0.414845	0.20412	0.352658	0.266408	0.23027	0	0.114651	0.124944	0.18765	0.124733
Utx	12.1522	13.6615	16.2029	10.9356	11.4367	15.9686	10.3664	12.5981	17.3725	12.2592	11.1008	10.2512	12.8902	18.3395	9.57163	11.0217	10.2681	14.1531	14.1994	16.4283	14.1905	10.7498	9.02219	12.9442	11.9984	9.90228	8.84743	9.73289	13.5153	12.8193	13.264	12.5342	16.1743	10.6703
CG34043	61.39	49.7707	18.7556	12.8971	77.9935	34.7895	8.23832	17.3975	18.9024	5.22018	8.22289	4.13713	12.936	14.9625	1.9918	34.0865	58.9519	3.38002	41.9913	11.7793	15.1199	5.18852	6.20405	9.18076	8.53601	2.56772	10.5625	11.4135	38.1698	5.12865	6.46954	3.05365	21.1437	8.47302
CG5604	76.5665	59.0449	76.7301	85.8997	71.9853	57.8969	61.4235	64.6342	79.1697	72.6311	74.5787	59.7484	75.0362	86.6448	94.464	64.2741	67.4836	74.7324	58.1233	65.1618	82.8212	66.9478	76.1779	79.8597	70.1266	70.9267	71.8019	57.2506	66.2699	76.6037	92.8166	81.6214	93.5458	69.72
Hand	26.2898	27.468	13.5353	19.8406	14.0107	31.3123	11.2328	8.6328	24.8214	22.4585	7.65891	19.5788	24.0962	24.5472	30.3297	19.5531	14.8677	17.0026	12.8371	5.72876	13.1595	14.2863	24.3795	21.7382	21.6174	9.09008	8.87037	10.6776	19.5976	16.413	20.2812	19.1654	29.1901	21.4475
CYLD	80.0063	53.1846	67.1204	129.721	91.8781	53.2	48.9471	52.8883	94.7775	63.6008	71.5439	51.9286	35.6299	44.4851	52.8538	35.5528	33.1992	89.8442	46.7619	41.0206	94.547	103.765	80.6627	93.1705	103.904	66.8588	79.9028	44.5041	40.0641	36.2106	50.7125	57.5729	53.7369	35.6843
CR44968	4.26179	2.6231	3.51551	13.2469	6.93226	2.30246	3.00718	5.54717	6.17539	4.33672	6.03404	5.55069	0.80305	1.35241	1.36388	0.744195	0.382792	8.22525	1.89394	2.31455	7.85427	12.1933	8.27899	4.23995	8.8441	3.31554	6.61933	2.0771	1.72053	1.42322	1.76918	1.52211	0.990607	0.405211
CG13138	0	0.363724	0.108326	0	0.147883	0	0.198562	0	0.142715	0	0.0531233	0.162036	0	0.0937637	0	0.0515957	0.0530787	0	0.157571	0.16047	0.0544544	0	0.0918384	0.0839885	0.0700765	0.045974	0.123557	0.096005	0.0207454	0.0563845	0	0	0.0845289	0
nmd	58.6951	51.3724	57.4983	45.0524	46.4063	45.5085	47.3146	44.568	45.6786	46.1927	43.2036	37.5127	62.1996	70.4169	52.9913	60.0035	62.4838	42.4992	49.9548	54.2859	40.9988	47.4788	36.1243	38.4576	46.3486	43.6208	41.0544	42.839	62.9969	67.7884	75.6213	66.3514	66.4822	65.2153
CG5390	57.1517	56.6788	80.3142	71.109	72.7505	69.6064	51.3385	73.1926	61.5651	44.7772	45.7341	54.5761	130.039	132.134	139.184	125.974	97.2147	98.8263	93.959	54.8337	91.9336	82.5212	72.6894	67.9337	62.5165	73.5685	66.0622	92.1775	125.744	100.117	124.22	113.977	187.687	104.989
CG4968	47.879	40.809	42.3774	49.972	47.7208	42.7494	36.7493	34.6663	47.234	33.9135	38.5047	40.9453	30.6036	32.8946	30.8703	32.9405	32.1481	38.1791	33.585	37.4427	39.2532	50.4914	40.5476	46.1993	44.9944	37.2484	37.9605	33.9351	33.3278	35.2701	35.1262	39.565	37.5581	30.4047
Cdk5alpha	1.4747	1.74552	0.987731	1.2341	1.49036	2.36389	1.90581	1.9259	4.42897	2.58571	3.77311	6.37642	2.09478	2.03988	2.86795	1.08948	2.75104	1.40745	2.0669	1.69422	2.82234	1.31071	1.93923	1.22934	2.62313	1.41203	0.965662	1.72774	1.29425	2.27296	1.8093	1.6206	1.64291	3.12787
l(2)SH0834	23.7349	21.6847	21.3009	32.4046	26.2951	29.1951	24.0083	28.5429	41.6965	28.3788	31.7825	33.3027	20.9642	30.9251	33.627	23.907	22.3734	28.6302	23.8424	18.6305	34.0597	23.6696	23.6301	40.0143	35.6218	28.2746	22.4865	21.5893	26.9495	21.3489	25.5507	30.9057	32.0494	18.1007
CG5384	44.5247	39.8196	43.5381	79.482	53.3158	49.5761	43.4048	45.9007	57.7022	42.768	66.1568	59.8761	34.9486	34.2355	40.8411	37.2651	36.3939	40.6597	36.3598	35.7133	51.1549	56.2514	72.8681	82.8041	54.5364	47.987	65.5422	46.4473	33.3021	29.3929	30.7023	38.4555	35.3935	30.8743
CG4972	56.6855	52.728	53.3824	50.7778	50.7418	74.7051	45.0094	35.007	61.6193	48.6818	46.9069	41.6411	47.2115	73.1415	55.7932	52.5279	51.1146	44.3257	41.7792	37.2358	43.9814	38.4427	34.2637	43.7807	50.3982	37.8245	35.8399	38.8382	48.8997	47.1858	51.8982	49.9348	66.3622	46.7034
CG5381	197.259	173.381	217.466	243.509	193.954	182.257	152.446	167.084	313.347	213.287	182.866	165.119	155.591	256.375	235.006	132.966	156.265	193.725	158.208	157.945	194.275	168.748	165.394	215.53	207.537	193.078	143.734	129.589	164.503	185.025	203.769	232.873	229.502	153.421
CG4995	0.84458	1.06329	1.19633	1.19327	1.05677	1.65924	1.13514	1.12973	1.05074	0.750048	0.93179	0.52632	1.44677	1.0152	0.63886	0.603331	0.689636	0.846774	0.61418	1.87644	0.849011	1.01388	0.83526	0.736585	0.728387	0.716791	1.1008	0.904339	1.02425	1.42855	1.644	1.02376	0.713868	1.38705
RnrL	8.98002	10.0179	4.9795	13.398	10.4496	7.00006	7.3925	6.70815	10.3013	6.50619	8.79912	6.86363	3.92569	4.39323	5.34532	6.93882	4.35554	9.28469	6.22553	5.85239	8.48174	10.03	12.5602	8.00869	9.86789	8.27863	10.7826	8.00565	7.77083	4.62682	4.68923	5.36679	4.27095	4.58929
CG5375	1.57044	1.63975	2.21047	3.07991	1.96499	1.47178	1.62072	2.28532	5.91471	2.60254	3.55457	5.34415	1.56414	1.57218	2.477	0.905939	2.26697	1.85568	1.89431	1.37072	2.58414	1.17266	2.26627	2.41134	2.70473	1.43992	1.17268	1.09342	1.04355	1.49841	1.10289	1.09507	1.14323	1.99978
CG5037	149.406	147.462	136.362	147.637	108.706	123.193	117.348	74.9494	93.1454	158.844	108.747	60.7393	157.608	182.426	181.25	188.229	157.444	129.515	157.368	135.663	129.35	117.559	73.6532	62.9106	91.2559	115.073	83.5271	89.299	160.382	232.269	244.362	231.138	245.986	198.669
GATAd	12.5638	10.3984	13.9288	20.7094	16.7921	14.9858	15.4576	14.3997	19.2829	17.6661	20.7346	23.0533	12.5783	17.3001	28.998	12.7423	12.1682	16.5328	13.5636	10.9845	21.6635	11.9052	16.6162	22.8164	15.7764	19.9434	14.4895	12.0611	14.8355	12.7747	13.6974	15.5919	18.3116	13.5897
SamDC	43.0122	45.9653	50.7728	54.6531	47.0764	66.5393	37.5445	45.2587	58.9008	52.5606	39.3032	43.6759	31.4217	65.1962	56.754	33.5097	41.7326	44.3086	57.8901	37.6065	39.8089	47.3312	31.8308	46.9568	45.5124	44.2731	31.3134	52.2161	35.874	44.1965	44.489	50.7338	60.916	51.1874
CG31715	49.2754	35.6085	44.2489	75.4443	54.666	60.6642	44.7773	50.804	82.0643	57.653	57.4774	62.9062	32.178	46.6359	63.9713	40.6711	41.84	52.8037	33.512	37.6499	55.7006	43.9056	55.7028	73.2934	61.2713	51.8374	54.5818	40.3504	40.6896	32.6444	39.4901	33.2503	46.442	30.6334
Sps2	54.2082	61.0955	50.8464	43.3554	50.1764	77.5588	61.4068	35.3416	63.9258	64.2581	44.064	40.2015	53.8798	75.4058	61.8846	56.4976	57.0181	40.2055	54.872	43.902	49.5864	43.8665	36.3334	42.6893	54.414	38.5963	41.1176	47.9601	67.5787	57.1287	66.8379	66.2338	81.7335	60.9603
CG5022	0.332812	0.0853513	0.406716	0.344825	0.347022	0.171242	0.596411	0.502249	0.803748	0.722482	0.84768	1.44488	1.21243	1.05612	1.3491	1.04124	1.3701	0.152935	0.591607	0.150623	0.562243	0.183115	0.574687	0.473009	0.920872	0.517835	0.513603	0.428041	1.32413	1.21727	1.59973	1.26789	1.52733	1.08116
CG34367	0.0654084	0	0.239799	0.0677694	0.163683	0	0.0439554	0.0740313	0.0526543	0.425974	0.146997	0.358695	0	0.103781	0.125594	0.0571082	0.293748	0.18034	0	0.0888073	0	0	0.10165	0.0697214	0.103418	0.0508858	0	0.0265655	0.0229619	0.0624087	0.0571637	0.0934434	0.07017	0.0932856
CG5367	0	1.01377	0.0754812	0.511961	0.309134	0.254243	0	0	0.0662957	0	0.0370161	0.169359	0.31036	0.34845	0	1.72568	0.0739702	0	0	0.22363	0.151775	0.181247	0.0853237	0.234092	0.0651055	0.384414	0.0491965	0.234136	0.115643	0.117866	0.43184	0.0392174	0.147249	0.195756
CG5045	131.266	116.523	116.792	117.946	93.0273	95.7629	114.419	90.9485	111.854	138.204	100.563	64.6682	85.0588	90.8312	79.1009	91.9108	92.2528	94.2133	125.947	117.658	99.9068	102.294	70.4485	73.3025	82.793	90.1702	83.6806	68.9919	83.2441	104.857	103.102	109.216	110.503	89.229
Cand1	11.1776	9.80963	9.83289	11.1446	11.8423	8.41006	9.09682	9.69496	7.2346	9.71657	11.1968	9.74129	12.1926	9.9667	10.7133	11.5982	10.5189	12.2343	10.8832	9.53278	10.9468	12.4854	12.7445	8.92098	9.88	10.7496	13.0273	11.5661	10.145	12.2459	11.499	13.6815	12.172	11.3486
pim	2.36621	2.91276	1.73499	2.32904	1.33231	3.28722	1.43111	2.00861	3.0477	2.3115	1.01037	1.78421	0.713385	1.6269	1.13587	1.49781	1.06266	2.28339	1.57732	1.28507	2.83452	2.34343	2.20638	2.05982	1.87062	1.56471	0.954125	1.77791	2.78273	1.01596	1.18907	0.845099	1.35384	1.01241
lft	7.85835	9.03417	12.8321	13.2893	13.3363	13.3849	14.8109	15.4373	18.6873	14.1915	15.2653	19.6898	14.0927	16.2426	12.4298	9.7791	11.5205	17.931	12.2028	9.1979	12.4017	14.9094	13.8503	15.3409	18.0304	16.1623	16.1336	18.7097	11.8275	10.816	9.98595	14.2805	13.76	12.9252
CG5056	15.3047	18.7264	16.9851	18.8185	16.958	18.2163	17.0384	17.5311	17.2189	19.7394	14.0483	16.0529	15.705	18.0907	17.2312	17.5887	17.3075	16.0147	18.6015	18.0258	19.0305	18.4648	16.0476	16.1174	15.5978	16.5689	18.9463	19.5467	18.2545	18.9133	18.2101	19.4937	21.3643	16.4803
rho-5	0.321067	0.304022	0.158454	0.2303	0.216317	0.228737	0.298746	0.391347	0.695857	0.442318	0.799264	1.60834	0.48399	0.195933	0.363575	0.247979	0.698769	0.136189	0.570729	0.570054	0.455162	0.244597	0.588524	0.272035	0.605266	0.307422	0.376219	0.451387	0.286114	0.518425	0.259012	0.176416	0.185467	0.540094
CG33303	25.046	22.4366	22.7739	27.0806	25.7534	24.498	32.3627	36.4873	21.8391	26.0415	33.6166	34.6096	34.3911	29.6933	33.1724	29.7704	39.5577	22.6994	21.8642	20.7402	18.7376	28.325	27.1053	22.6444	26.9362	32.6423	34.6938	32.7531	28.3623	29.15	26.05	32.4037	22.5595	31.5709
dpr19	0.689762	1.26036	0.592685	0.714659	0.53941	0.731989	0.956029	0.683107	3.95625	1.61435	2.11208	3.60529	0.812326	1.11722	1.32445	0.564593	1.10356	0.475443	1.26444	1.28771	1.98625	0.521829	1.29527	1.1335	2.21526	0.536614	0.502183	0.805419	0.499421	0.76096	0.791197	0.431114	0.616645	1.43462
gny	3.03184	3.27259	3.19356	3.42258	4.41637	5.72767	3.13218	4.40465	3.46062	3.09435	3.94583	3.44315	2.66034	4.47545	3.12801	3.31875	3.27189	4.8658	3.09689	3.37916	4.003	3.43587	3.28181	4.75919	3.97088	3.30919	3.55472	3.84116	3.00238	2.67691	2.70899	2.49967	3.54382	2.90418
CG5096	50.5212	18.3549	2.76543	5.52528	52.3272	64.6619	10.421	45.4275	7.23021	18.6217	20.248	26.7435	29.8814	13.4343	10.9134	32.0105	36.9326	22.8287	7.54625	24.3891	16.8758	2.23921	19.3378	28.6964	15.6708	20.4162	39.2552	7.52367	35.9393	8.90438	7.42015	10.4253	10.2878	10.0741
cdc2	1.06939	3.94919	0.294042	1.55118	0.802834	1.6507	0.431185	0.968292	1.46347	0.261165	0.720994	1.24619	0.725417	0.622145	0.136892	3.50131	0.480259	0.58969	0.66533	0.580777	0.985413	1.05909	0.83096	0.759933	1.18357	0.49917	0.415237	0.608061	3.49133	0.459154	0.514024	0.305548	0.573617	0.508386
mRpS7	334.631	355.891	295.139	338.735	234.612	311.829	276.771	181.661	286.242	347.499	243.875	114.434	291.687	420.367	388.707	345.764	302.207	244.92	315.364	276.167	288.355	219.246	123.932	141.943	200.254	197.9	146.421	169.17	305.865	387.186	489.237	425.121	491.334	321.286
da	10.1481	9.98186	10.3019	12.2113	11.01	11.4014	12.7761	10.4318	12.0471	10.8232	11.4033	11.1611	11.2796	11.9743	15.7038	11.7904	10.9034	10.6252	11.1318	11.0315	13.8789	12.51	11.5621	11.9355	10.2441	14.5906	13.4482	12.6258	9.80822	11.9961	11.2125	12.7543	11.1854	11.6335
Mdh1	159.333	168.788	203.957	125.836	134.107	174.033	137.9	179.221	90.7608	127.004	110.552	123.374	225.504	180.883	197.47	238.297	240.51	174.98	219.325	190.007	161.628	197.064	147.036	84.553	120.817	155.033	175.564	232.347	284.053	234.677	217.857	193.044	214.653	238.38
Cnot4	59.4439	59.1221	62.2798	70.2963	58.1699	60.9453	55.2727	59.4667	71.0403	60.768	61.6422	53.8111	48.0198	60.6631	58.3366	43.6606	42.5583	67.7254	58.2804	58.8379	62.6387	60.576	50.9924	77.0799	57.2653	62.5392	54.2928	49.0107	45.512	54.263	57.6568	61.8603	64.7698	46.0464
CG17768	0	0	0	0	0	0	0	0	0	0	0	0	0	0	0	0	0	0	0	0	0	0	0	0	0	0	0	0	0	0	0	0	0	0
LSm-4	0	0	0	0	0	0	0	0	0	0	0	0	0	0	0	0	0	0	0	0	0	0	0	0	0	0	0	0	0	0	0	0	0	0
Ir31a	0.0511301	0.550729	0	0	0.063976	0.0789242	0	0.0578707	0	0	0.0229817	0.0700985	0.0385379	0.108169	0.130903	0.111605	0.229625	0	0	0.138842	0.0942304	0	0.0264869	0.0726688	0.0606318	0	0.030544	0.0415329	0	0.146356	0.0446852	0.170439	0.127989	0.0729219
RpS27A	2397.41	2104.93	2473.03	2168.65	2500.1	2374.97	2187.97	2078.13	2146.59	2243.14	1870.78	2030.74	1608.69	1752.16	1756.76	2128.85	1749.31	1989.04	1956.93	1920.5	1928.74	2346.29	1827.36	1942.14	2009.01	1835.62	2113.8	2131.02	1773.4	1671.96	1717.12	1793.09	1904.8	1701.79
Ip259	119.76	122.541	133.075	110.751	111.943	109.947	108.805	111.122	94.2873	105.164	99.9167	121.058	100.117	98.2787	84.24	119.027	103.382	95.539	110.315	98.4971	99.2459	124.427	94.0563	101.665	98.0013	90.3323	107.374	127.815	111.259	92.9514	90.1868	95.3885	86.7755	107.317
CG5355	30.1783	30.0688	24.66	29.8214	30.3527	36.5532	27.3314	29.7442	30.2994	23.1174	29.2705	31.9047	32.4684	31.591	28.804	38.5355	33.5691	27.7353	24.5552	26.5319	25.2805	30.0837	28.9726	34.3743	30.2501	29.8809	35.2075	29.8896	38.2202	28.4039	27.489	30.782	34.5266	30.0893
Klp31E	11.8112	11.6075	11.8722	11.9573	11.0557	13.6853	12.5623	11.5314	18.3146	16.0985	14.6972	13.2263	11.3035	15.9588	14.4078	11.3095	11.2971	11.2694	10.3108	10.3237	12.8777	9.72309	11.2251	14.4908	14.0655	15.4549	11.1402	9.83832	12.6712	12.3018	13.8551	14.3404	18.5068	11.7302
RfC3	1.93866	3.9251	1.21575	2.43151	2.68107	2.83501	1.57708	4.15751	2.29989	0.996757	2.29311	2.37809	1.84574	1.45706	1.30615	3.6971	1.42053	0.843974	1.45102	1.80097	2.16252	2.58245	2.32571	2.79158	2.37959	1.90512	1.8286	1.74054	2.47156	1.7524	1.3376	1.11756	1.20409	1.50373
pie	5.64967	2.30117	3.14752	11.822	5.05925	1.62446	1.07944	4.1376	5.97486	1.8487	3.88377	3.30327	0.375731	0.615187	0.744485	0.918844	0.547252	5.65046	1.96919	2.55692	5.76747	13.0435	10.1287	4.78234	5.8676	2.49928	4.06984	5.12912	0.933336	0.634184	0.459868	0.342894	0.415948	0.500307
CG5168	74.7307	55.2509	98.3487	108.658	90.1167	54.4607	82.1443	84.1109	74.6393	86.4478	82.6941	85.458	55.5409	57.0089	107.443	61.5485	56.5179	72.7661	64.3837	73.5523	115.517	84.1454	124.845	114.206	82.9903	114.331	108.536	81.9441	54.4682	53.5769	68.194	65.5186	52.727	51.1774
SmB	7.30627	6.65366	6.55986	7.57	8.95532	6.44452	8.6174	9.78836	6.6018	7.04024	8.3105	7.87032	7.0803	5.44144	5.72618	8.85266	7.36604	4.93333	4.9035	7.28815	6.73255	8.36809	10.2732	8.26486	8.07464	9.2801	11.2233	9.08398	5.75793	7.96708	5.53829	6.31951	5.27875	5.67087
KdelR	54.4077	54.6569	57.9454	74.4984	69.155	67.8209	73.6153	95.4833	69.5656	75.2577	75.2115	90.7188	51.9971	54.3267	59.7643	54.8807	65.1783	53.3531	47.6509	52.1868	55.8145	62.0588	81.19	85.4506	71.9841	84.7067	82.4821	83.7072	50.0649	63.0411	52.0092	59.6133	48.7944	56.3306
CG5188	11.0198	10.1739	11.6151	12.5593	12.4095	12.2472	11.2563	11.4747	12.5968	14.9813	11.4912	7.17625	14.7844	21.5645	16.8571	18.0401	15.5892	13.9762	11.8512	8.97715	14.927	11.0349	7.59239	7.596	12.5013	8.57305	7.63623	7.78765	16.1704	17.927	24.462	17.0549	24.9838	17.4452
CG5343	17.0555	14.7268	15.9695	11.9503	14.5852	15.9097	17.0686	12.9156	15.9029	15.4825	11.0854	12.3643	18.2191	22.0645	13.7436	19.1764	15.7049	14.2088	15.159	13.4943	14.0202	15.1225	11.3142	15.0847	14.5504	11.3595	11.6546	14.2528	18.2637	19.9026	22.7874	18.5811	25.4053	18.958
TfIIB	32.4616	33.4108	32.5955	36.623	32.6743	32.5142	30.2496	25.2289	29.9645	29.0097	28.8895	21.6587	30.2303	34.299	37.5833	33.066	33.4008	29.436	31.9936	31.4396	31.5744	29.6089	27.0552	27.8354	28.229	27.8357	27.3856	28.3607	33.073	40.2303	41.9873	42.0124	41.609	34.0195
CG5337	4.2751	4.365	4.431	4.59501	3.34948	2.83696	3.70527	3.66294	4.4064	4.32588	5.18999	5.149	4.00521	4.3108	4.90996	3.94191	4.30641	3.74542	4.0483	4.9365	5.74343	4.52852	4.38786	4.24468	5.13274	5.1909	3.44889	4.4463	4.1938	4.61275	5.51705	4.14776	5.40071	5.73627
holn1	36.895	32.2498	29.1242	42.9301	34.0795	37.8679	23.6906	16.6161	35.7654	33.1014	25.7434	18.4719	22.9312	38.0051	33.5056	27.2378	24.6374	33.2869	26.0107	22.6864	31.9509	22.7444	18.1621	20.4532	26.0752	21.7153	20.9729	16.5932	26.2433	29.3512	35.4098	38.1748	50.7713	26.5395
CHIP	55.9963	49.7739	48.3334	54.4501	49.4307	69.0924	39.1525	45.4314	74.3267	51.1906	44.962	39.6893	49.9228	76.7711	70.057	52.134	56.1553	55.2106	41.1525	40.8436	51.6827	41.5779	41.4932	62.4573	51.3955	39.052	36.4821	41.2903	55.824	48.9326	64.7359	67.4841	80.4532	45.4446
CG13142	2.92824	3.8621	2.99059	2.94726	3.45456	4.52002	2.30516	2.55673	5.25332	2.58811	2.93319	2.8102	2.77462	4.33641	3.96264	3.50627	3.19374	5.07483	3.34624	3.52141	5.16533	2.57783	2.73045	5.2914	3.24092	2.79879	2.8738	2.71841	3.87692	2.79395	3.76559	3.38651	4.75699	2.78418
CR45375	0.300539	0	0	0	0	0.46391	0	0	0	0	0	0	0	0	0	0	0	0	0	0	0	0	0	0	0	0.467621	0	0	0	0	0	0	0.107472	0
loh	2.36628	1.47753	1.13155	1.84765	1.67348	1.74688	1.49799	2.36771	2.15333	1.45171	1.74181	1.52803	2.22293	1.90445	1.75598	1.66178	1.47853	0.945531	1.82883	2.37466	2.14887	1.01891	1.6344	2.33953	1.72156	1.28062	1.49551	1.1282	2.54023	1.84874	1.85821	2.15568	2.24421	1.79337
ppk10	0.699985	0.430835	0.513254	1.1604	0.525509	1.40464	0.42336	0.633812	0.84524	0.512851	0.503401	0.911683	0.527594	0.481279	0.0896051	0.15279	0.125745	0.192996	1.18208	0.475197	0.774023	0.770274	0.253829	0.497427	0.442702	1.30696	0.459971	0.341158	0.0982929	0.0667882	0.275288	0.166668	0.625785	0.0332773
CG5322	14.4991	12.1144	18.905	17.4954	12.9266	22.3807	7.87625	8.91086	17.0059	11.9772	9.35113	12.6008	10.7403	16.1093	16.4853	11.2595	9.67926	23.3766	14.8182	11.947	19.0068	15.4846	11.7555	10.0503	11.1244	12.7487	8.36348	12.3708	11.468	10.4861	12.5158	9.78848	16.9813	9.80581
LM408	102.745	103.895	132.206	120.61	91.4574	161.694	50.6181	66.8325	91.0943	83.8486	66.7238	81.1067	109.08	152.174	163.345	101.873	101.311	131.192	141.849	91.8039	143.277	116.216	79.9033	66.5742	61.2339	80.7006	63.6606	101.388	101.89	85.3457	118.116	78.8363	146.966	102.656
RluA-1	11.1486	5.88479	9.82138	9.3455	19.8635	18.6569	8.97103	8.04472	9.43943	10.8674	8.48145	12.4403	12.1013	16.9259	10.7612	15.0103	7.29149	14.2252	8.91481	9.94429	9.44202	10.4815	9.70028	9.28137	11.4805	14.1748	10.4964	11.1222	12.2479	8.88165	9.08117	9.75899	9.28948	8.76482
RluA-2	5.05825	7.25261	4.74148	5.35995	5.82563	7.71916	4.17176	6.1805	7.54233	5.00681	4.0304	5.24048	12.2174	17.0547	17.4385	13.4499	15.1788	5.86379	5.00667	6.00929	5.93225	4.23788	6.28282	8.47572	6.11185	4.02461	4.29217	5.64961	10.9368	10.6123	11.9559	14.0694	12.1685	11.6682
Grip75	12.43	13.3885	11.4918	14.5026	13.5243	16.1838	11.3312	12.2948	19.0989	14.4304	14.6234	9.8914	11.3648	18.2074	15.4274	10.8999	11.7714	15.3476	11.8164	11.3001	13.1472	12.132	13.2702	17.2246	15.744	11.6463	9.20107	12.4675	12.7683	11.6022	14.5945	14.9783	17.7412	11.7414
CG7456	9.54826	11.3531	10.5812	10.2527	11.2955	10.652	9.88734	10.2175	11.879	9.53948	9.69535	11.0674	14.1318	16.4124	16.5285	14.3996	15.6906	10.8894	8.37078	9.36944	10.4782	10.6981	10.1848	10.5017	10.5678	9.04897	10.2152	11.4049	13.3316	14.5559	14.3567	12.8347	15.753	15.3303
CG6144	4.88618	4.59465	5.0382	5.48444	5.34956	5.55196	4.74295	4.37818	5.57234	5.4693	4.84998	5.16371	5.01273	5.88635	5.12546	7.1991	5.36403	4.49063	4.82539	4.23848	5.06531	5.52618	4.67566	4.38853	4.53342	3.22055	4.43915	4.27222	5.26506	5.63336	6.16818	5.04145	5.6059	5.29103
CG13144	41.1487	44.5393	37.1008	28.2942	24.4865	31.701	34.5531	20.9707	31.8671	41.4331	21.0706	13.0579	37.8009	43.0146	34.8147	43.8206	37.628	29.1326	43.5173	43.0384	21.3243	23.9095	13.5298	15.8897	25.736	21.1294	17.8248	17.8609	39.5224	65.7791	63.5024	49.1121	60.1096	49.1352
Myo31DF	23.9025	11.9987	15.3993	57.7487	44.9957	19.8129	49.9712	43.5224	36.844	42.7994	44.9978	68.7544	15.673	10.3742	14.8357	13.7803	11.3363	26.0803	16.4812	24.631	39.7053	49.2733	57.233	63.1443	46.7323	105.131	74.4676	37.1123	23.0754	9.05093	9.89446	9.78742	8.9404	9.03202
CR44224	0	0.249011	0	0	0	0	0	0	0	0	0.072738	0.221864	0	0	0	0.0706465	0	0	0.143834	0	0	0	0	0.172499	0	0	0	0.131453	0	0	0	0	0	0
CG6094	24.5992	21.6295	24.6936	18.34	19.054	15.4698	25.3651	16.4991	10.5823	25.8529	19.5394	8.38667	30.8035	26.5712	21.4095	33.296	31.2135	16.1485	23.4834	24.5635	16.1911	22.343	13.8893	9.48035	17.0805	18.3274	20.0988	16.123	25.8156	39.3047	42.8833	32.6016	25.1799	33.1034
CG7384	4.70813	5.66965	6.09759	5.19622	4.54631	4.89763	4.57394	7.1244	3.33692	5.9574	3.3353	5.47252	7.7144	9.20247	10.023	7.28305	9.10118	5.36172	6.36787	7.15671	3.81971	4.89933	5.80576	5.89138	5.32009	7.4052	6.12949	11.1407	9.44975	8.12992	9.57109	8.77318	7.192	10.4127
Fatp	0	0	0	0	0	0	0	0	0	0	0	0	0	0	0	0	0	0	0	0	0	0	0	0	0	0	0	0	0	0	0	0	0	0
CG45083	0	0	0	0	0	0	0	0	0	0	0	0	0	0	0	0	0	0	0	0	0	0	0	0	0	0	0	0	0	0	0	0	0	0
Lrr47	1.79056	1.99514	1.47136	1.27945	1.2361	2.38268	0.954329	1.53743	0.994081	1.55816	1.05458	1.56601	1.58228	1.73074	1.69932	2.02157	1.46963	1.02142	1.20731	1.50897	1.70686	1.29093	1.34337	1.25048	1.46435	1.2489	1.16185	1.60493	1.79905	2.23865	1.72675	1.55834	2.05339	1.81988
Lip4	12.4548	9.69502	21.4878	17.307	19.2507	20.733	24.5842	28.4146	22.844	17.8924	18.6824	15.803	36.7767	44.7672	29.4484	25.1388	18.6448	17.1025	10.3753	13.9925	16.2475	11.3406	16.8763	19.2806	9.96205	16.9851	19.8843	11.0295	27.8284	14.237	22.346	17.9094	45.691	21.246
CG18301	0.506379	0.259727	1.08294	0.349771	0.1056	0.781643	0.397009	0.573135	0.407639	0.412226	0.531078	0.404971	0.318057	0.312455	0.378125	0.257903	0.303218	0.930772	0.375058	0.57294	0.466616	0.464355	0.131159	0.299871	0.36696	0.32829	0.327707	0.239942	0.266649	0.201315	0.331912	0.24114	0.543241	0.200611
CG18302	0.215872	1.66085	0.692498	1.45382	1.21548	1.16627	0.217604	0.183248	0.304113	0.351469	0.26683	0.184973	0.732184	3.16829	3.55785	3.43973	0.945241	1.19038	2.59021	0.219823	3.63031	1.30652	0.111828	0.153404	0.127994	0.167942	0.402991	0.394543	1.21252	1.77651	1.10839	2.69848	5.50019	1.87292
CR44618	0.174521	0	0	0	0	0	0	0	0	0	0	1.07669	0	0	0	0.152375	0	0	0	0	0.160817	0	0	0.248038	0.0689843	0	0.0521275	0.141763	0.245065	0	0.0762614	0	0.0624086	0.0829674
Trim9	1.36448	1.30639	0.194538	0.691156	2.08668	5.10167	2.03766	3.29463	1.80628	1.18482	3.48898	3.30485	1.6912	0.75373	1.24207	1.81346	3.06392	2.42443	1.32055	2.14078	1.11763	0.800794	2.07339	4.38489	2.72071	1.53331	2.66268	1.56402	1.7457	1.3019	0.821488	0.693088	1.09514	1.23968
CG6138	0	0	0	0	0	0	0	0	0	0	0	0	0	0	0	0	0.137108	0	0	0	0	0	0	0	0	0	0.0455944	0.061998	0	0	0	0	0	0
w-cup	0	0	0.056621	0	0	0	0.0415147	0	0	0	0	0	0	0	0	0	0	0	0	0	0.0569256	0	0	0	0	0	0	0	0	0	0	0	0	0
CG34160	0	0	0	0	0	0	0	0	0	0	0	0	0.175475	0	0.298022	0	0.209111	0	0	0	0	0	0	0.165442	0.368102	0	0	0	0	0	0	0	0	0.110679
CG34161	0	0	0	0	0	0	0	0	0	0	0	0	0	0	0	0	0	0	0	0	0.184786	0	0	0	0	0	0	0	0	0	0	0	0	0
CG7329	0	0	0	0	0	0	0.0396113	0	0	0	0	0	0	0	0	0	0.0264717	0.162518	0	0	0	0	0	0	0.0232993	0	0	0	0	0	0	0	0	0
CR45351	0	0	0	0	0	0	0	0	0	0	0	0	0	0.0593564	0	0	0	0	0	0	0	0	0	0.0398762	0	0	0	0.0455814	0	0	0	0	0	0
CG31872	0	0	0	0	0	0	0.022863	0	0	0	0	0	0	0	0	0	0	0	0	0	0	0	0	0.0362649	0	0	0	0	0	0	0	0	0	0
CG18284	0	0	0	0	0	0	0	0	0	0	0	0	0	0	0	0	0	0	0	0	0	0	0	0	0	0	0	0	0	0	0	0	0	0
CG17097	0.0341119	0	0	0.0353432	0.0426821	0	0	0	0	0	0	0.0467668	0	0	0	0	0	0	0	0	0	0.0375372	0	0	0	0	0	0	0	0.0325474	0	0	0	0
CR44580	0	0	0	0	0.271628	0	0	0	0	0	0	0	0	0	0	0	0	0	0	0	0	0	0	0	0	0	0	0	0	0	0	0	0	0
CG17098	0	0	0	0	0	0	0	0	0	0	0	0.0289793	0	0	0	0	0	0	0	0	0	0	0	0	0	0	0	0	0	0.0201682	0	0	0	0
CR45692	0	0	0	0	0	0	0	0	0	0	0	0	0	0	0	0	0	0	0	0	0	0	0	0	0	0	0	0	0	0	0	0	0	0
CG45690	0	0	0	0	0	0	0	0	0	0	0	0	0	0	0	0	0	0	0	0	0	0	0	0	0	0	0	0	0	0	0	0	0	0
CG31871	1.09158	0.458086	1.09143	0.514083	0.310415	0.459534	0.700214	0.224634	0.279596	0.161567	0.289923	0.374134	1.68289	0.682293	0.603393	0.801438	0.423378	1.64162	1.4994	1.14524	1.23447	0.764394	1.20805	0.370223	0.607991	0.231605	0.933668	0.423192	2.43857	0.757468	1.01903	0.378048	1.18879	1.03788
CG17104	2.98775	1.58817	3.53504	3.771	3.39854	2.59942	6.27897	7.50108	3.97945	2.47645	2.88118	5.51119	1.7606	2.67196	2.64247	2.51375	1.9517	3.74439	3.37975	2.72897	3.30377	2.74977	3.99599	6.50463	3.50003	3.12735	4.0564	4.34643	3.43264	1.73635	3.34701	3.56989	2.44765	2.14348
CR44180	0	0	0	0	0	0	0	0	0	0	0	0.240353	0	0	0	0	0	0	0	0	0	0	0	0	0	0	0	0	0	0	0	0	0	0
CG17105	0	0	0	0	0	0	0.208464	0	0	0	0	0	0.467621	0	0	0.406265	0	0	0	0	0	0	0	0.110221	0.0613091	0.120666	0.0926556	0.251981	0.1089	0	0	0	0	0
CG17107	0.369083	0	0.16914	0.191203	0.230905	0	1.7362	1.04435	1.78269	0.751145	0.580628	0.632508	2.08639	1.26883	1.06304	2.7391	1.24316	0.508807	2.13227	0.250558	1.0203	0.812289	0.955979	1.04912	1.53185	1.43568	1.43313	1.72388	3.04485	0.528234	1.12896	1.93335	0.857894	1.84235
CG7299	0	0	0	0	0.294563	0.181694	0	0	0	0	0.0529071	0.0806882	0	0	0	0	0	0	0	0	0	0	0	0.0418234	0	0.0915738	2.63687	0.0478072	0	0	0	0	0	0
CG7296	0.122701	0	0.337384	0.508522	0.307058	0	3.05091	3.33306	1.28408	0.599323	0.772118	0.672886	1.20228	0.194686	0.392675	0.374958	0.44084	0	0.545286	0.166596	0.339199	0.270045	4.06803	0.915546	0.873021	1.43187	4.32465	1.54489	0.990721	0.40976	0.536175	0.467448	0.702047	0.583323
CG7294	0	0	0	0.445666	0	0	0	0.730268	0	0.175081	0.0966685	0.147428	0	0	0	0.0938889	0	0	0	0	0.396363	0	0.334237	0.917004	0.510074	0.669271	3.01923	0.0873503	0	0.102603	0.18796	0	0	0
CG17108	449.112	244.732	633.209	208.973	336.944	129.351	351.644	353.843	79.7017	112.32	152.091	136.76	775.012	131.804	184.637	678.096	377.23	613.652	686.225	748.925	415.037	442.141	517.883	94.1275	160.314	293.174	458.372	475.274	677.586	647.325	493.711	513.23	540.281	343.702
CG7300	0.608187	0.233959	0.801306	0.354454	0.523178	0.997468	1.1495	1.37673	2.35618	1.60909	1.0422	1.5634	2.86502	3.71923	2.77355	2.17382	2.91914	1.25764	0.439203	0.877366	1.40107	0.962058	1.31931	1.55319	1.02171	2.30661	1.70305	5.72764	3.28266	1.83155	3.6044	2.47988	4.73034	2.72869
CR44181	3.46606	1.70213	3.10921	2.36865	2.53753	2.10593	0.792934	0.667745	0.920175	0.72041	0.563499	0.935216	5.83632	6.29906	5.56973	6.92169	3.2788	5.28654	2.81846	2.353	4.21322	2.15051	1.83372	1.20533	1.10771	1.34825	1.8723	2.11161	5.32015	6.56143	4.49541	6.14569	11.5771	4.31224
Lip1	0.137665	0.105915	0.189264	0.213951	0.0861259	0.212499	0.878872	0.233721	0.166232	0.168103	1.79443	0.660577	0.259403	0.218429	0.308394	0.240391	0.0927377	0	0.428249	0.654194	0.25371	0.151489	0.106972	0.146743	0.163248	1.07099	0.596226	0.139781	0.579934	0.0985136	0.270703	0.131114	0.344602	0.065446
Lip2	1.71643	1.39824	2.40605	2.09222	1.83183	2.49362	2.0016	1.99985	2.60092	3.12335	3.33557	1.69568	3.80503	7.02211	10.0166	3.85674	4.19431	2.92298	3.54469	1.71357	1.62817	2.55541	2.01369	1.95517	2.19504	7.10867	2.66894	3.73167	5.60025	4.45554	5.69145	6.65918	8.99026	5.27994
CG6415	22.7909	31.6615	37.2955	36.7109	26.5541	32.4737	24.5549	25.4821	17.604	32.5246	18.9534	18.912	27.9577	47.1906	55.3372	30.0093	40.7342	23.9139	43.4655	28.8142	19.2157	37.0607	19.024	19.9333	19.4764	30.5799	22.875	49.6177	38.676	44.1516	42.0941	46.0049	36.4275	52.8141
CR44407	0	0	0	0	0	0	0	0	0	0.148805	0	0	0	0.0966769	0	0	0.0820917	0	0	0	0	0	0.378767	0.129897	0	0.142207	0	0	0.0641699	0	0.159751	0	0	0.0868995
CG6431	0	0	0	0	0.0737533	0	0	0	0	0	0	0	0	0	0	0.0257322	0	0	0	0.160061	0	0	0	0.0209436	0	0.0458569	0	0	0	0	0	0	0	0
CG6443	25.311	19.5486	20.3324	18.3269	12.2278	17.3477	18.6512	15.2641	14.1606	20.1275	15.4178	13.599	26.1487	24.8094	27.3341	27.1333	28.3081	13.4722	18.7615	17.5145	19.7214	19.5721	18.9843	13.4379	16.2628	21.5159	17.6889	18.6946	25.1471	32.3091	35.2306	31.7852	26.3149	25.1343
CG17118	0.118189	0.181862	0	0.489823	0.147883	0.182437	0.397125	0.535082	0.0951434	0.48107	0.690602	0.405089	0.712656	0.187527	0.302589	0.257979	0.106157	0.325865	0.105047	0.48141	0.108909	0.130057	0.183677	0.335954	0.233588	0.367792	0.494226	0.336018	0.165963	0.563845	0.258229	0.506542	0.0845289	0.337124
CG6750	40.4496	33.0598	38.504	33.8262	29.1358	27.0502	50.7357	33.2838	25.1222	38.4005	42.0269	27.2342	35.7349	31.233	31.1138	35.9454	35.7388	27.1367	29.0174	33.7342	24.2221	33.1524	28.602	23.8401	32.4996	28.2003	35.887	35.2458	31.2231	37.5065	35.0362	39.039	27.4701	31.6121
Dpy-30L1	18.7252	13.591	18.2958	15.0084	12.1569	7.36236	24.811	13.3961	7.11034	13.5179	13.657	8.11329	22.9013	11.5853	11.1936	20.2049	22.2136	7.30585	15.3869	19.9073	9.92965	13.8018	10.2493	5.58626	9.0775	16.6291	13.4021	13.7037	18.2943	25.9569	24.5473	27.2558	15.0347	17.8039
Nup107	10.1004	8.52507	9.84342	7.81565	7.03891	5.98641	11.37	7.95898	4.42569	9.12446	9.57784	5.84283	10.3433	5.72519	7.22855	10.6978	9.26357	5.40516	9.69698	10.8205	7.18665	10.7864	8.38938	4.6488	7.09212	9.38299	10.1199	9.65853	8.75228	12.443	10.522	11.5478	6.79709	10.6976
Vha16-5	0.47879	0.245576	0.146277	0.330715	0	0	0.321753	0.361273	0	0.129922	0.143469	0	0.240583	0.0844089	0.10215	0.209016	0.286698	0	0	0.65007	0	0	0	0.17012	0.189255	0.124161	0.0476697	0.19446	0.224108	0.228416	0.209219	0.0760006	0.285358	0.151745
CG12299	0.80401	1.022	0.736911	0.86925	0.787311	0.80939	0.587289	1.10783	0.731656	0.569145	0.864176	1.34191	0.974869	0.776511	0.850219	1.22084	1.00474	0.578288	0.963164	0.806859	1.28848	0.80781	1.12274	0.968811	0.911969	0.516714	0.971036	0.851863	0.96947	1.01729	1.1762	0.89892	1.08755	0.930639
CG6729	7.19064	6.42453	7.54724	5.64773	5.22419	4.59493	7.92379	6.69465	4.91713	5.97954	6.3424	5.14113	7.69254	6.56334	6.26021	7.86458	8.83719	5.75583	6.80338	7.61093	4.77357	7.69998	6.5287	5.64557	5.89854	6.73699	6.6165	6.469	7.55933	8.94495	9.08853	8.43168	6.52519	7.71905
mir-4970	0	0	0	0	0	0	0	0	0	0	0	0	0	0	0	0	0	0	0	0	0	0	0	0	0	0.873952	0	0	0.394365	0	0.490886	0.534956	0	0
CG17124	55.2407	41.994	79.4053	62.2082	63.5007	55.8104	34.7032	37.6804	46.8688	39.6754	30.3103	35.7707	44.7581	71.8224	47.7206	54.078	35.2048	62.0113	56.117	46.5677	65.5639	47.5823	29.3583	35.4042	25.0947	32.1038	29.8199	43.0167	36.7057	44.6923	39.363	47.8189	90.6997	41.3706
CG6495	13.8975	9.79545	12.2446	12.4947	11.1065	12.3868	6.47724	6.84998	4.11413	3.86847	5.11815	5.83887	13.2456	8.53573	11.3627	12.9559	9.98612	22.6195	26.6566	16.0691	14.2107	14.701	14.863	7.32727	6.55659	8.37043	12.8815	12.2903	10.1037	14.03	12.5767	12.4675	12.5846	11.871
UbcD2	19.7299	19.0534	23.1692	26.3511	20.8295	20.3826	18.4725	20.7608	23.7827	17.5672	20.7153	18.2794	12.3924	16.3861	16.7059	13.2785	12.9679	18.841	16.1203	19.0446	19.9797	24.4249	23.795	28.8991	22.32	24.5029	23.9407	18.4472	15.7644	13.8491	16.2326	14.8761	18.0243	12.4084
CG6724	7.99022	7.77125	6.01071	5.46703	6.88519	5.23599	8.20628	7.84915	5.03653	6.19775	6.09862	8.37086	5.90878	4.14621	4.77642	8.25965	4.13004	6.85845	7.43671	5.93603	5.55683	8.04602	10.0355	5.94589	5.7208	5.98159	8.08289	9.46012	5.37184	6.32917	4.315	5.85106	4.39377	5.51866
CG17127	0.493422	0.379622	0.904487	0	0.617389	0	0.49738	0.558471	1.39023	0	0.776234	0.338236	2.97522	0.391449	0.473722	0.215404	2.10515	2.72087	0.219277	3.01471	0	2.17188	1.66145	0	0.585117	0.191934	0.294759	0.901812	3.72418	2.11857	1.94052	0.587425	0.441118	2.11116
CG31869	2.7578	1.38375	3.87389	1.64608	1.87536	3.97929	9.85057	10.5176	10.3763	3.0015	10.1321	7.47958	4.49613	1.80736	1.97617	1.93674	3.71556	5.86802	1.62521	4.15135	3.01082	1.94618	15.4508	28.9384	13.9224	5.0139	10.4487	2.92193	4.23033	1.97349	2.55426	0.885033	3.21582	4.38919
CR44582	0	0	0	0.178665	0	0	0.115882	0	0	0	0	0	0	0	0	0	0.0774427	0	0	0	0	0	0	0.245081	0	0	0.051506	0	0	0	0	0	0	0
CG31870	0	0	0.0880092	0	0	0	0	0	0	0	0	0	0	0	0	0	0	0	0	0	0	0	0	0	0	0	0	0	0	0	0	0	0	0
CR44581	0	0	0	0	0	0	0.14825	0	0	0	0.0991567	0.0756115	0	0	0	0	0	0	0	0	0	0	0	0.235152	0	0	0.0329462	0	0	0	0	0	0	0
Nos	2.17062	1.32919	1.98947	1.8359	1.57969	1.02568	1.90523	2.85789	1.87218	1.47854	1.70239	3.44656	0.8848	0.995731	1.50272	1.03461	1.3926	2.99236	1.83082	1.83444	1.67362	1.94987	2.55869	2.45541	1.96114	1.87823	1.88548	1.97909	0.816434	1.05667	1.32598	1.18133	0.974226	1.25304
CG6508	0	0.77466	0	0	0	0	0	0	0	0	0	0	0	0	0	0	0	0	0	0	0	0.0923323	0	0	0	0	0	0	0	0	0	0	0	0
CG17134	0	0	0	0	0.11463	0	0	0	0	0	0	0	0	0	0	0	0	0	0	0	0	0	0	0	0	0	0	0	0	0.0437058	0	0	0	0
CG6700	37.6287	35.1665	41.5177	33.1402	37.1653	46.5221	27.9243	36.6378	53.2731	31.1334	35.3366	36.6779	35.7081	59.0937	39.1389	31.3308	39.0162	42.4326	36.1118	35.4181	36.3284	32.7701	34.6804	46.5806	34.158	25.3828	27.7266	32.9722	32.9116	40.2715	41.0453	41.2124	48.2012	36.0944
mir-4987	0	0	0	0	0	0	0	0	0	0	0	0	0	0	0	0	0	0	0	0	0	0	0	0	0	0	0	0	0	0	0	0	0	0
CG17140	0	0	0	0	0	0	0	0	0	0	0	0	0	0	0	0	0	0	0	0	0	0	0	0	0	0	0	0	0	0	0	0	0	0
CG17139	0	0	0	0	0	0	0	0	0	0	0	0	0	0	0	0	0	0	0	0	0	0	0	0	0	0	0	0	0	0	0	0	0	0
Porin2	1.74382	2.05191	1.50427	1.70048	1.66854	0.950029	4.13601	2.43811	0.990909	4.00824	2.2592	3.0939	0.695835	0.922287	0.853512	1.07473	0.460674	4.24231	2.37045	2.22837	1.98498	1.12878	0.903349	0.76539	1.05421	3.27189	1.01108	1.99976	1.11632	1.02767	1.97225	0.586175	0.696951	1.60926
porin	548.092	609.382	537.714	563.095	414.172	420.016	482.05	406.356	374.472	679.492	399.302	235.368	892.466	967.838	704.489	905.049	898.371	477.528	673.72	600.751	455.436	468.853	337.261	238.115	362.884	385.738	382.064	345.108	844.582	1245.99	1453.19	1162.62	1117.22	992.077
CG43129	2.29787	2.20988	2.19386	2.48002	1.91679	1.33012	2.3163	1.40877	1.15613	2.65005	2.04416	1.54236	1.08247	0.835533	1.04178	1.06584	0.988972	2.77181	2.17	2.59992	1.45574	2.68665	2.03354	1.56489	2.98982	3.01671	2.01615	2.0221	1.14279	2.23817	2.07098	2.05173	1.47224	1.61586
Dnz1	5.58056	6.30321	7.78107	11.1334	7.57687	9.53051	7.46053	7.59294	8.17233	7.24938	8.77913	7.40667	7.11472	8.22651	10.7915	8.50077	7.30536	6.05635	8.0732	7.89934	9.13587	9.86468	9.13399	7.74153	7.83788	9.32962	9.16767	7.42652	7.64873	7.42048	5.81105	7.43531	7.34551	7.59209
ial	0.293426	0.451503	0.0896459	0.101339	0	0	0	0	0	0.0796226	0.131888	0.268188	0.294882	0.15519	0.438216	0.597778	0.439256	0.269672	0.173865	0.132798	0.450641	0.21526	0.152003	0.173763	0.154646	0.152184	0.146072	0.238349	0.686721	0.279969	0.256439	0.372615	0.104929	1.06946
Stam	30.1229	29.3203	32.5139	34.3606	30.7919	29.4129	35.0915	44.0974	27.4802	33.5321	33.8032	33.7943	28.9686	29.9121	40.7919	28.3357	29.1865	27.6098	31.6378	29.3943	35.1919	35.4675	41.7731	42.6825	29.4067	43.9361	42.02	33.5416	27.0987	32.0875	32.5442	38.6707	29.6336	28.9685
CR43807	0	0	0	0	0	0.408241	0.0888652	0.29934	0.106452	0	0.0594373	0.0906474	0	0	0	0	0	0.364597	0	0.179543	0	0	0	0.328899	0	0	0	0.0537079	0	0	0	0.062972	0	0
CG12517	0	3.52243	0	0	0	0	0	0	0.167528	0	0	0	0	0	0.133199	0.181699	0	0	0	0	0	0.229004	0.539028	0.221829	0.0822601	0	0	0	0.0730567	0	0	0	0	0
CR45453	0	1.33365	0	0.449004	0	0	0	0	0	0	0	0	0	0	0	0	0	0	0	0	0	0	0	0	0	0	0	0	0.152133	0	0	0	0	0
CR45454	0	0.479899	0	0	0	0.481416	0	0	0.251066	0	0.140182	0	0	0	0	0	0	0	0	0	0	0	0	0.332445	0	0	0	0.12667	0	0	0	0	0	0
CR44490	0	0	0	0	0	0	0	0	0	0	0	0	0	0	0	0	0	0	0	0	0	0	0	0	0	0	0	0	0	0	0	0	0	0
CG14071	0	0	0	0.0973085	0	0	0	0	0	0	0	0	0	0	0	0	0	0	0	0	0	0	0	0.0333704	0	0	0	0	0	0	0	0	0	0
CR44491	0	0	0	0	0	0	0	0	0	0	0	0	0	0	0	0	0	0	0	0	0	0	0	0	0	0	0	0	0	0	0	0	0	0
CG14070	0	0	0	0	0	0	0	0	0	0	0	0	0	0	0	0	0	0	0	0	0	0	0	0.0334519	0	0.0732441	0	0	0	0	0	0	0	0
CR45724	0	0	0	0	0	0	0	0	0	0	0	0	0	0	0	0	0	0	0	0	0	0	0	0	0	0	0	0	0	0	0	0	0	0
CG7309	0.0552831	0	0	0	0	0	0	0	0.0445033	0	0.0248484	0	0	0	0	0	0	0	0	0	0	0	0	0	0	0	0	0	0.0194073	0	0.0241573	0	0	0.0262816
CG14069	0.193491	0	0.354686	0	0	0	0	0	0	0	0	0	0	0	0	0.0844686	0	0	0.34395	0	0	0	0	0.0687498	0.0764826	0.15053	0.115587	0.078586	0	0	0	0	0	0.0919856
dpr2	0.228445	0	0.0697934	0.27614	0.0952798	0.176313	0.307037	0.258562	0.45975	0.309949	0.513402	0.782986	0.54525	0.34233	0.463018	0.132971	0.427476	0.104976	0.169202	0.206779	0.31576	0.16759	0.256406	0.175867	0.496646	0.0592412	0.0568617	0.231957	0.227224	0.435937	0.299475	0.199442	0.245075	0.561115
CG14072	0	0	0	0	0	0	0.0999448	0	0.119724	0	0	0	0	0	0	0.0649257	0	0	0	0	0.137046	0	0	0	0	0	0	0	0	0	0	0	0	0
CR44492	0	0	0	0	0	0	0	0	0	0	0	0	0	0	0	0	0	0	0	0	0	0	0	0	0	0	0	0	0	0.093244	0	0	0	0
CR44493	0	0	0	0	0	0	0	0	0	0	0	0.225973	0	0	0	0	0	0	0	0	0	0	0	0	0	0	0	0	0	0	0	0	0	0
CG33129	17.1846	19.8446	20.2247	25.9043	22.7814	30.9556	21.412	24.9753	26.7647	21.1855	23.3501	29.1219	19.6399	26.1672	26.0514	24.1906	22.264	23.3719	20.9317	18.5851	20.2727	23.4835	19.7692	20.7789	23.8201	21.8884	22.2555	26.3908	21.5487	26.1211	19.4289	23.9219	26.6921	20.9022
YL-1	9.77474	10.0271	12.965	12.0213	9.0486	9.32281	8.97197	9.98401	6.84516	10.7391	8.53697	7.73553	11.3207	11.4323	9.35905	12.1424	11.385	10.079	12.3607	10.6819	11.1308	11.1061	11.4034	8.16035	9.45517	9.89198	10.2067	10.4253	10.9081	12.2836	13.6821	11.9208	12.845	11.7117
CG16743	33.5814	40.7758	33.1868	29.5864	33.3003	41.4336	17.6546	38.0086	36.5042	28.1744	15.9668	33.4335	35.0395	42.1065	19.1543	14.7597	61.1975	34.957	51.0652	40.3219	23.9978	44.118	31.7155	38.3932	26.6835	28.9689	29.3747	63.3706	49.5214	54.1651	33.641	28.067	17.6046	58.537
abo	5.09526	4.36671	4.37446	4.74458	5.00346	5.27652	4.59434	5.91297	4.3094	4.25289	3.73968	6.18969	3.50012	4.12752	3.01353	4.53315	3.38896	5.15699	4.1274	4.11578	4.27913	5.46495	4.27665	5.1104	4.58896	4.11449	4.23819	5.21287	3.46421	3.60003	4.08661	3.40923	3.55186	3.49545
l(2)06225	746.893	892.696	754.186	833.263	560.027	496.202	808.713	727.342	510.47	1059.41	593.902	344.81	895.767	719.698	702.759	1020.49	1017.42	703.547	1154.32	927.468	626.757	925.98	564.301	280.439	537.478	585.054	657.132	522.121	893.218	1404.36	1382.26	1246.43	911.026	987.066
[truncated: 14,962 more rows]

## Sheet: Table 2
Supplementary Table 2: Differential expressed gene analysis from DeSeq2 under TRF versus ALF in WT
[truncated: 10,491 more rows]

## Sheet: Table 3
Supplementary Table 3: Differential expressed gene analysis from DeSeq2 under TRF versus ALF in DIO
[truncated: 10,491 more rows]

[truncated: 5 more sheets: Table 4, Table 5, Table 6, Table 7, Table8_Glossary]
